# Supplementary material for: Temporal Quantitative Changes in the Resistant and Susceptible Wheat Leaf Apoplastic Proteome During Infection by Wheat Leaf Rust (Puccinia triticina)
Source: Front Plant Sci. 2019 Oct 23;10:1291. doi: 10.3389/fpls.2019.01291 (PMC6819374; doi:10.3389/fpls.2019.01291)
Supplement: Table S3 — Perseus data showing all proteins with significantly altered abundance relative to control at all time-points. [file Table_3.xlsx]

## Sheet: Significant Proteins
			Table S3. Perseus data showing all proteins with significantly altered abundance relative to control at all time-points. A negative value in column D indicates that the abundance was higher in the experiment vs. control sample.
24h Lr1	Significant	#NAME?	Difference	Protein IDs	Majority protein IDs	Fasta headers	Peptides	Razor + unique peptides	Unique peptides	Sequence coverage [%]	Unique + razor sequence coverage [%]	Unique sequence coverage [%]	Mol. weight [kDa]	Score	Intensity	MS/MS count	-Log Student's T-test p-value Oil_Lr1_24_Rust_Lr1_24	Student's T-test q-value Oil_Lr1_24_Rust_Lr1_24	Student's T-test Difference Oil_Lr1_24_Rust_Lr1_24	Student's T-test Test statistic Oil_Lr1_24_Rust_Lr1_24	LFQ intensity Oil_Lr1_24_1	LFQ intensity Oil_Lr1_24_2	LFQ intensity Oil_Lr1_24_3	LFQ intensity Oil_TH_24_1	LFQ intensity Oil_TH_24_2	LFQ intensity Oil_TH_24_3	LFQ intensity Rust_Lr1_24_1	LFQ intensity Rust_Lr1_24_2	LFQ intensity Rust_Lr1_24_3	LFQ intensity Rust_TH_24_1	LFQ intensity Rust_TH_24_2	LFQ intensity Rust_TH_24_3		QUERY ID	GI Number	Ref ID	Protein Name	Common Name	Scientific Name
	+	1.1874	-4.29516	Q94F73;C3UZE3;C3UZE2;A0A0A7ACH1;A0A1D6D3U2;Q84ML7;Q2V6H5	Q94F73;C3UZE3;C3UZE2;A0A0A7ACH1;A0A1D6D3U2;Q84ML7	tr|Q94F73|Q94F73_WHEAT Pathogenesis-related protein 1 OS=Triticum aestivum GN=Pr-1-4 PE=2 SV=1;tr|C3UZE3|C3UZE3_WHEAT Pathogenesis-related protein 1 OS=Triticum aestivum PE=2 SV=1;tr|C3UZE2|C3UZE2_WHEAT Pathogenesis-related protein 1 OS=Triticum aestivum P	8	8	1	56.7	56.7	7.9	17.537	322.01	74502000000	152	1.1874	0.7115	-4.29516	-2.52581	28.1266	27.9106	28.2594	27.6216	28.7995	27.6167	30.3386	31.0817	35.7617	31.1221	32.1957	29.5102		Q94F73	1149816966	XP_020167256.1	pathogenesis-related protein PRB1-3	bread wheat;Aegilops tauschii subsp. tauschii	Triticum aestivum;Aegilops tauschii subsp. tauschii
	+	1.29446	-3.76825	A0A1D5SA13	A0A1D5SA13	tr|A0A1D5SA13|A0A1D5SA13_WHEAT Uncharacterized protein OS=Triticum aestivum PE=4 SV=1	4	3	3	53.8	44.3	44.3	10.855	275.5	33572000000	121	1.29446	0.707208	-3.76825	-2.76169	27.8711	28.1459	28.4816	28.0578	26.4579	28.6969	30.7269	30.4411	34.6354	31.0847	31.1669	30.8703		A0A1D5SA13	1149717010	XP_020184520.1	chitinase 8-like	Aegilops tauschii subsp. tauschii	Aegilops tauschii subsp. tauschii
	+	1.35952	-4.62546	A0A1D5TQY9;Q43219	A0A1D5TQY9;Q43219	tr|A0A1D5TQY9|A0A1D5TQY9_WHEAT Peroxidase OS=Triticum aestivum PE=3 SV=1;tr|Q43219|Q43219_WHEAT Peroxidase (Fragment) OS=Triticum aestivum GN=pox3 PE=2 SV=1	11	8	2	59.6	44.9	17.6	32.611	323.31	16381000000	211	1.35952	0.766395	-4.62546	-2.90951	25.8927	24.023	26.8461	24.5621	25.8731	25.6959	29.2372	28.5083	32.8928	28.0549	31.1805	29.308		A0A1D5TQY9	57635147	AAW52715.1	peroxidase 1	Triticum monococcum	Triticum monococcum
	+	2.39091	2.99056	A0A1D5V3G5	A0A1D5V3G5	tr|A0A1D5V3G5|A0A1D5V3G5_WHEAT Uncharacterized protein OS=Triticum aestivum PE=3 SV=1	7	7	1	44.1	44.1	6.2	16.016	74.55	13133000000	206	2.39091	0.826462	2.99056	5.92509	30.4518	30.9728	31.5759	31.0379	30.2648	30.1787	27.7772	28.764	27.4876	28.4152	27.554	27.8761		A0A1D5V3G5	1149720082	XP_020185985.1	60S ribosomal protein L27a-3-like	Aegilops tauschii subsp. tauschii	Aegilops tauschii subsp. tauschii
	+	1.35071	-4.14535	A0A1D5WHM8	A0A1D5WHM8	tr|A0A1D5WHM8|A0A1D5WHM8_WHEAT Uncharacterized protein OS=Triticum aestivum PE=3 SV=1	11	5	2	59.3	35.9	17.7	34.875	172.66	10844000000	99	1.35071	0.760398	-4.14535	-2.88927	26.3638	25.9969	25.1536	26.3393	28.5641	26.403	29.7961	27.6763	32.4779	30.1954	28.0105	27.7568		A0A1D5WHM8	1149766838	XP_020148298.1	glucan endo-1,3-beta-glucosidase GIII-like	Aegilops tauschii subsp. tauschii	Aegilops tauschii subsp. tauschii
	+	1.25669	4.20105	W5DNR0;A0A1D5X760;A0A1D5X761;A0A1D5X759;A0A1D5X763	W5DNR0;A0A1D5X760;A0A1D5X761;A0A1D5X759;A0A1D5X763	tr|W5DNR0|W5DNR0_WHEAT Uncharacterized protein OS=Triticum aestivum PE=4 SV=1;tr|A0A1D5X760|A0A1D5X760_WHEAT Uncharacterized protein OS=Triticum aestivum PE=4 SV=1;tr|A0A1D5X761|A0A1D5X761_WHEAT Uncharacterized protein OS=Triticum aestivum PE=4 SV=1;tr|A0A	20	3	3	61.8	12.8	12.8	41.755	114.14	11397000000	108	1.25669	0.699174	4.20105	2.67747	30.5645	30.4498	30.2465	30.3228	29.0598	30.1411	28.3104	27.1935	23.1537	29.8157	29.0039	29.0174		W5DNR0	1149801490	XP_020161074.1	ankyrin repeat domain-containing protein 2A-like	Aegilops tauschii subsp. tauschii	Aegilops tauschii subsp. tauschii
	+	1.55628	-5.0937	C3UZE5	C3UZE5	tr|C3UZE5|C3UZE5_WHEAT Pathogenesis-related protein 1-1 OS=Triticum aestivum GN=Pr-1-1 PE=2 SV=1	7	4	2	56.1	29.9	8.5	17.635	176.62	29579000000	149	1.55628	0.771673	-5.0937	-3.38024	26.7982	25.109	27.3084	26.4289	27.5562	24.4016	30.3307	29.9702	34.1957	29.9694	31.2402	29.7147		C3UZE5	228480395	ACQ41880.1	pathogenisis-related protein 1.1	bread wheat	Triticum aestivum
	+	1.5879	-4.82027	C6ETB3	C6ETB3	tr|C6ETB3|C6ETB3_WHEAT Peroxidase OS=Triticum aestivum GN=Prx113-F PE=3 SV=1	9	5	1	47.5	29.1	8.2	32.905	260.83	41589000000	294	1.5879	0.805045	-4.82027	-3.45954	27.7948	25.6009	28.3539	27.1764	28.7482	28.8302	31.5118	30.4858	34.2128	29.4728	32.5672	31.1064		C6ETB3	193074373	ACF08092.1	class III peroxidase	bread wheat	Triticum aestivum
	+	1.15385	-4.26638	W5C8U5	W5C8U5	tr|W5C8U5|W5C8U5_WHEAT Peroxidase OS=Triticum aestivum PE=3 SV=1	9	5	5	43.9	23.1	23.1	33.081	323.31	18616000000	114	1.15385	0.719355	-4.26638	-2.45364	26.6618	24.3751	27.4214	25.1075	26.2558	26.2627	29.5678	28.3928	33.2968	29.6182	31.2166	29.1796		W5C8U5	1149715536	XP_020183803.1	peroxidase 1-like	Aegilops tauschii subsp. tauschii	Aegilops tauschii subsp. tauschii
24h Th
48h Lr1	+	1.82138	-3.92771	A0A0H4TM98;A0A023W638;A0A023W5U7	A0A0H4TM98;A0A023W638;A0A023W5U7	tr|A0A0H4TM98|A0A0H4TM98_WHEAT Chitinase OS=Triticum aestivum PE=4 SV=1;tr|A0A023W638|A0A023W638_WHEAT Endochitinase OS=Triticum aestivum PE=4 SV=1;tr|A0A023W5U7|A0A023W5U7_WHEAT Endochitinase OS=Triticum aestivum PE=4 SV=1	6	1	1	43.1	6.9	6.9	33.565	90.886	7875800000	97	1.82138	0.388543	-3.92771	-4.08086	24.5814	27.7286	26.7256	25.6221	29.1874	27.3362	30.1743	29.8897	30.7547	27.3048	29.7493	28.1391		A0A0H4TM98	880797018	AKQ09033.1	chitinase	bread wheat	Triticum aestivum
	+	1.55505	-4.5024	Q94F73;C3UZE3;C3UZE2;A0A0A7ACH1;A0A1D6D3U2;Q84ML7;Q2V6H5	Q94F73;C3UZE3;C3UZE2;A0A0A7ACH1;A0A1D6D3U2;Q84ML7	tr|Q94F73|Q94F73_WHEAT Pathogenesis-related protein 1 OS=Triticum aestivum GN=Pr-1-4 PE=2 SV=1;tr|C3UZE3|C3UZE3_WHEAT Pathogenesis-related protein 1 OS=Triticum aestivum PE=2 SV=1;tr|C3UZE2|C3UZE2_WHEAT Pathogenesis-related protein 1 OS=Triticum aestivum P	9	9	2	56.7	56.7	15.2	17.537	323.31	239650000000	531	1.55505	0.374721	-4.5024	-3.37719	30.1115	32.0395	29.2252	29.8546	31.0256	30.1188	33.1044	35.0674	36.7116	34.6149	33.2822	33.3922		Q94F73	1149816966	XP_020167256.1	pathogenesis-related protein PRB1-3	bread wheat;Aegilops tauschii subsp. tauschii	Triticum aestivum;Aegilops tauschii subsp. tauschii
	+	2.10918	-3.44006	A0A0C4BK99;A0A1D6AC31;A0A1D6B9Y0;A0A077S0Z5	A0A0C4BK99;A0A1D6AC31	tr|A0A0C4BK99|A0A0C4BK99_WHEAT Uncharacterized protein OS=Triticum aestivum PE=4 SV=1;tr|A0A1D6AC31|A0A1D6AC31_WHEAT Uncharacterized protein OS=Triticum aestivum PE=4 SV=1	8	8	7	55.4	55.4	48.2	12.681	58.441	9108300000	66	2.10918	0.34887	-3.44006	-4.94714	27.3154	26.0526	25.5175	26.4783	28.2849	30.1268	29.4786	30.6044	29.1227	29.1741	28.9264	29.2542		A0A0C4BK99	1149808625	XP_020163819.1	60S ribosomal protein L35a-1-like	Aegilops tauschii subsp. tauschii	Aegilops tauschii subsp. tauschii
	+	1.58599	-4.42506	A0A1D5TQY9;Q43219	A0A1D5TQY9;Q43219	tr|A0A1D5TQY9|A0A1D5TQY9_WHEAT Peroxidase OS=Triticum aestivum PE=3 SV=1;tr|Q43219|Q43219_WHEAT Peroxidase (Fragment) OS=Triticum aestivum GN=pox3 PE=2 SV=1	11	8	2	59.6	44.9	17.6	32.611	323.31	23602000000	262	1.58599	0.376116	-4.42506	-3.45472	26.659	28.8617	26.1828	26.2439	27.0175	26.4223	30.599	30.763	33.6166	29.8584	30.049	30.0847		A0A1D5TQY9	57635147	AAW52715.1	peroxidase 1	Triticum monococcum	Triticum monococcum
	+	1.79362	-3.22191	A0A1D5V896	A0A1D5V896	tr|A0A1D5V896|A0A1D5V896_WHEAT Uncharacterized protein OS=Triticum aestivum PE=3 SV=1	10	3	2	41.3	28.4	17.7	33.855	323.31	7463600000	152	1.79362	0.357407	-3.22191	-4.00348	26.6676	26.8251	27.0429	29.1149	26.0357	25.4902	28.6356	30.174	31.3917	28.4474	27.7938	30.2878		A0A1D5V896	1149763711	XP_020147117.1	glucan endo-1,3-beta-glucosidase, acidic isoform-like	Aegilops tauschii subsp. tauschii	Aegilops tauschii subsp. tauschii
	+	1.75899	3.31571	A0A1D6D5D4	A0A1D6D5D4	tr|A0A1D6D5D4|A0A1D6D5D4_WHEAT Plastocyanin OS=Triticum aestivum PE=3 SV=1	4	4	3	46.1	46.1	20.8	15.603	323.31	521890000000	1097	1.75899	0.378417	3.31571	3.90831	35.6101	35.7743	33.7848	35.3612	35.4894	35.1454	30.6994	31.9055	32.6171	35.43	31.5665	34.2959		A0A1D6D5D4	1149783517	XP_020180739.1	plastocyanin, chloroplastic	Aegilops tauschii subsp. tauschii	Aegilops tauschii subsp. tauschii
	+	3.60005	-2.75707	A0A1D6RL92;W5BER0	A0A1D6RL92;W5BER0	tr|A0A1D6RL92|A0A1D6RL92_WHEAT Uncharacterized protein OS=Triticum aestivum PE=4 SV=1;tr|W5BER0|W5BER0_WHEAT Uncharacterized protein OS=Triticum aestivum PE=4 SV=1	13	13	0	37	37	0	28.924	323.31	13883000000	317	3.60005	0.178667	-2.75707	-12.2977	28.2262	28.1651	27.7411	25.5993	29.1061	28.4464	30.8186	30.5083	31.0766	30.1086	30.6726	30.9042		A0A1D6RL92	1149805557	XP_020162618.1	loricrin-like	Aegilops tauschii subsp. tauschii	Aegilops tauschii subsp. tauschii
	+	1.48452	-5.10245	C3UZE5	C3UZE5	tr|C3UZE5|C3UZE5_WHEAT Pathogenesis-related protein 1-1 OS=Triticum aestivum GN=Pr-1-1 PE=2 SV=1	7	4	2	56.1	29.9	8.5	17.635	323.31	65403000000	248	1.48452	0.402642	-5.10245	-3.20418	26.1669	29.9211	27.9017	27.693	28.6311	27.6229	31.0319	33.1985	35.0667	32.3955	31.4428	31.4294		C3UZE5	228480395	ACQ41880.1	pathogenisis-related protein 1.1	bread wheat	Triticum aestivum
	+	1.81648	-3.71516	C6ETB3	C6ETB3	tr|C6ETB3|C6ETB3_WHEAT Peroxidase OS=Triticum aestivum GN=Prx113-F PE=3 SV=1	10	6	1	59.2	40.8	8.2	32.905	320.94	26356000000	277	1.81648	0.374667	-3.71516	-4.06714	27.9406	28.9694	27.1084	26.8071	28.6111	28.2203	30.8832	31.088	33.1926	29.9288	31.1511	31.8538		C6ETB3	193074373	ACF08092.1	class III peroxidase	bread wheat	Triticum aestivum
	+	2.22209	-5.17887	O82714	O82714	tr|O82714|O82714_WHEAT Pathogenesis-related protein 1-3 OS=Triticum aestivum GN=PR-1.1 PE=2 SV=1	8	6	2	56.1	42.1	13.4	17.651	323.31	93059000000	288	2.22209	0.353263	-5.17887	-5.32221	28.61	30.0807	28.0367	28.5955	29.2539	28.2948	32.7313	34.1759	35.3567	32.8381	32.0989	31.9894		O82714	3702663	CAA07473.1	pathogenisis-related protein 1.1	bread wheat	Triticum aestivum
	+	1.35773	-3.8	O82716;A0A1D5W683;Q84QH7	O82716;A0A1D5W683	tr|O82716|O82716_WHEAT Glucan endo-1,3-beta-D-glucosidase OS=Triticum aestivum PE=2 SV=1;tr|A0A1D5W683|A0A1D5W683_WHEAT Uncharacterized protein OS=Triticum aestivum PE=3 SV=1	15	3	3	77	11.6	11.6	35.412	284.33	14291000000	164	1.35773	0.391679	-3.8	-2.90539	26.5583	29.8335	26.2334	27.3971	28.6559	27.2513	30.8358	30.6077	32.5818	30.6814	29.7524	29.9239		O82716	3757682	CAA77085.1	glucan endo-1,3-beta-D-glucosidase	bread wheat	Triticum aestivum
	+	1.70573	-3.35212	Q9XEN5	Q9XEN5	tr|Q9XEN5|Q9XEN5_WHEAT Beta-1,3-glucanase OS=Triticum aestivum GN=Glb3 PE=2 SV=1	12	11	4	59.3	56.3	23.1	34.881	323.31	237240000000	1253	1.70573	0.392419	-3.35212	-3.76491	31.2671	32.8775	31.015	31.1631	32.463	32.1187	33.8743	35.1403	36.2013	34.493	33.8589	34.0348		Q9XEN5	4741846	AAD28732.1	beta-1,3-glucanase precursor	bread wheat	Triticum aestivum
48h Th	+	3.82957	-3.43613	A0A1D5TQY9;Q43219	A0A1D5TQY9;Q43219	tr|A0A1D5TQY9|A0A1D5TQY9_WHEAT Peroxidase OS=Triticum aestivum PE=3 SV=1;tr|Q43219|Q43219_WHEAT Peroxidase (Fragment) OS=Triticum aestivum GN=pox3 PE=2 SV=1	11	8	2	59.6	44.9	17.6	32.611	323.31	23602000000	262	3.82957	0.052	-3.43613	-1.53111	26.659	28.8617	26.1828	26.2439	27.0175	26.4223	30.599	30.763	33.6166	29.8584	30.049	30.0847		A0A1D5TQY9	57635147	AAW52715.1	peroxidase 1	Triticum monococcum	Triticum monococcum
	+	2.93419	-3.77355	C3UZE5	C3UZE5	tr|C3UZE5|C3UZE5_WHEAT Pathogenesis-related protein 1-1 OS=Triticum aestivum GN=Pr-1-1 PE=2 SV=1	7	4	2	56.1	29.9	8.5	17.635	323.31	65403000000	248	2.93419	0.104	-3.77355	-1.53647	26.1669	29.9211	27.9017	27.693	28.6311	27.6229	31.0319	33.1985	35.0667	32.3955	31.4428	31.4294		C3UZE5	228480395	ACQ41880.1	pathogenisis-related protein 1.1	bread wheat	Triticum aestivum
	+	3.11794	-3.59406	O82714	O82714	tr|O82714|O82714_WHEAT Pathogenesis-related protein 1-3 OS=Triticum aestivum GN=PR-1.1 PE=2 SV=1	8	6	2	56.1	42.1	13.4	17.651	323.31	93059000000	288	3.11794	0.0346667	-3.59406	-1.50447	28.61	30.0807	28.0367	28.5955	29.2539	28.2948	32.7313	34.1759	35.3567	32.8381	32.0989	31.9894		O82714	3702663	CAA07473.1	pathogenisis-related protein 1.1	bread wheat	Triticum aestivum
72h Lr1	+	1.70823	-4.58702	A0A077S0N0;A0A1D5V2H3;A0A1D5UF02;A0A1D5V2H2;A0A1D5TIT4	A0A077S0N0	tr|A0A077S0N0|A0A077S0N0_WHEAT Uncharacterized protein OS=Triticum aestivum GN=TRAES_3BF061600080CFD_c1 PE=3 SV=1	12	11	6	42.9	42.9	22.8	34.386	323.31	18796000000	114	1.70823	0.013	-4.58702	-1.42622	27.1214	25.3451	26.743	27.5463	27.9089	25.7682	28.9903	31.2402	32.7401	29.9066	29.2153	30.6121		A0A077S0N0	1149763711	XP_020147117.1	glucan endo-1,3-beta-glucosidase, acidic isoform-like	Aegilops tauschii subsp. tauschii	Aegilops tauschii subsp. tauschii
	+	1.42307	-3.30474	A0A0A7AC77;A0A1D6D7A2;Q84QH7	A0A0A7AC77;A0A1D6D7A2	tr|A0A0A7AC77|A0A0A7AC77_WHEAT Beta-1,3-endoglucanase (Fragment) OS=Triticum aestivum GN=PR-2-1b PE=2 SV=1;tr|A0A1D6D7A2|A0A1D6D7A2_WHEAT Uncharacterized protein OS=Triticum aestivum PE=3 SV=1	16	16	1	84.1	84.1	13.7	33.267	323.31	146630000000	442	1.42307	0.0555	-3.30474	-1.07266	29.1345	32.7842	30.8354	30.5321	31.8618	31.4912	33.7971	34.252	34.6192	34.0943	33.489	32.6917		A0A0A7AC77	570339394	AHE76176.1	beta-1,3-endoglucanase, partial	bread wheat	Triticum aestivum
	+	2.78949	-3.72589	A0A1D5SU87;A0A1D5SU86	A0A1D5SU87;A0A1D5SU86	tr|A0A1D5SU87|A0A1D5SU87_WHEAT Uncharacterized protein OS=Triticum aestivum PE=4 SV=1;tr|A0A1D5SU86|A0A1D5SU86_WHEAT Uncharacterized protein OS=Triticum aestivum PE=4 SV=1	20	20	2	77.7	77.7	15.6	27.134	323.31	235020000000	821	2.78949	0.0148571	-3.72589	-1.49545	30.7638	31.678	31.2745	31.3214	32.3069	31.3049	34.1844	35.1135	35.596	33.4194	34.6803	33.3993		A0A1D5SU87	1149717010	XP_020184520.1	chitinase 8-like	Aegilops tauschii subsp. tauschii	Aegilops tauschii subsp. tauschii
	+	2.25612	2.67126	A0A1D5UBI3;P29546;W5HWH3	A0A1D5UBI3;P29546	tr|A0A1D5UBI3|A0A1D5UBI3_WHEAT Uncharacterized protein OS=Triticum aestivum PE=3 SV=1;sp|P29546|EF1B_WHEAT Elongation factor 1-beta OS=Triticum aestivum PE=1 SV=2	12	4	4	71.6	33.5	33.5	23.318	106.37	3116400000	90	2.25612	0.0522353	2.67126	1.07233	28.6219	27.9972	28.4823	27.6068	27.5125	26.4663	26.5073	25.6396	24.9407	27.6837	26.5922	27.7208		A0A1D5UBI3	1149793053	XP_020157821.1	elongation factor 1-beta	Aegilops tauschii subsp. tauschii	Aegilops tauschii subsp. tauschii
	+	2.0608	-4.94633	A0A1D5V895	A0A1D5V895	tr|A0A1D5V895|A0A1D5V895_WHEAT Uncharacterized protein OS=Triticum aestivum PE=3 SV=1	12	6	5	71	42.6	37.8	34.701	279.41	17280000000	274	2.0608	0.0208	-4.94633	-1.63136	25.7174	27.3029	24.8314	27.7103	28.9397	27.8521	29.4517	31.3727	31.8663	29.7925	29.7862	29.1666		A0A1D5V895	300681515	CBH32609.1	glucan endo-1,3-beta-glucosidase GII precursor,putative, expressed	bread wheat	Triticum aestivum
	+	1.54584	-5.4623	A0A1D5W1T2	A0A1D5W1T2	tr|A0A1D5W1T2|A0A1D5W1T2_WHEAT Uncharacterized protein OS=Triticum aestivum PE=3 SV=1	13	13	5	86	86	38.5	29.202	323.31	73536000000	172	1.54584	0.0173333	-5.4623	-1.50541	25.1463	29.026	28.3802	24.7312	30.0486	29.4132	30.8998	33.3956	34.6439	33.4366	32.2947	30.8684		A0A1D5W1T2	1149766838	XP_020148298.1	glucan endo-1,3-beta-glucosidase GIII-like	Aegilops tauschii subsp. tauschii	Aegilops tauschii subsp. tauschii
	+	2.5135	2.63668	A0A1D5Z211;A0A1D5ZZP3;W5FDU3;Q5QFC3;A0A1D5YL35;W5FUL1;A0A1D5YL36;A0A1D5Z210;A0A1D5VHV8;A0A1D5WRD8;A0A1D5VHV7;A0A1D5VHV9;tr|A0A180G3S7|A0A180G3S7_PUCT1;tr|A0A0C4EJA2|A0A0C4EJA2_PUCT1	A0A1D5Z211;A0A1D5ZZP3;W5FDU3;Q5QFC3;A0A1D5YL35;W5FUL1;A0A1D5YL36;A0A1D5Z210	tr|A0A1D5Z211|A0A1D5Z211_WHEAT Uncharacterized protein OS=Triticum aestivum PE=4 SV=1;tr|A0A1D5ZZP3|A0A1D5ZZP3_WHEAT Uncharacterized protein OS=Triticum aestivum PE=4 SV=1;tr|W5FDU3|W5FDU3_WHEAT Uncharacterized protein OS=Triticum aestivum PE=4 SV=1;tr|Q5Q	13	13	10	26.5	26.5	19.6	58.772	77.599	3046400000	85	2.5135	0.0623333	2.63668	1.09308	28.7858	27.8848	28.8498	27.2919	28.3158	28.3532	26.3447	25.8552	25.4104	24.5954	26.9435	26.7435		A0A1D5Z211	53680379	AAU89392.1	glutamine-dependent asparagine synthetase	bread wheat	Triticum aestivum
	+	1.48647	-4.2675	A0A1D6BV27;A0A1D6CKD4	A0A1D6BV27;A0A1D6CKD4	tr|A0A1D6BV27|A0A1D6BV27_WHEAT Uncharacterized protein OS=Triticum aestivum PE=4 SV=1;tr|A0A1D6CKD4|A0A1D6CKD4_WHEAT Uncharacterized protein OS=Triticum aestivum PE=4 SV=1	14	7	7	81	51.3	51.3	24.489	323.31	43328000000	570	1.48647	0.0115556	-4.2675	-1.28157	26.1036	29.043	28.0086	27.701	29.2877	28.2389	30.1066	32.2669	33.5842	30.0296	30.9315	30.9522		A0A1D6BV27	157093716	ABV22584.1	PR17d precursor	domesticated barley	Hordeum vulgare subsp. vulgare
	+	1.60108	3.10526	A0A1D6C2S0;A0A1D6C2S1;A0A1D6C2R9;A0A1D6C2S2	A0A1D6C2S0;A0A1D6C2S1;A0A1D6C2R9	tr|A0A1D6C2S0|A0A1D6C2S0_WHEAT Xyloglucan endotransglucosylase/hydrolase OS=Triticum aestivum PE=3 SV=1;tr|A0A1D6C2S1|A0A1D6C2S1_WHEAT Xyloglucan endotransglucosylase/hydrolase OS=Triticum aestivum PE=3 SV=1;tr|A0A1D6C2R9|A0A1D6C2R9_WHEAT Xyloglucan endotr	9	2	1	43.4	16	5	31.146	208.83	16878000000	283	1.60108	0.0592	3.10526	1.07485	30.3836	31.0174	28.4713	30.6073	31.9003	30.3272	27.7542	26.3382	26.4642	27.6841	27.9594	27.0296		A0A1D6C2S0	474151765	EMS56986.1	Xyloglucan endotransglucosylase/hydrolase protein 22	Triticum urartu	Triticum urartu
	+	2.16601	-7.04977	C3UZE5	C3UZE5	tr|C3UZE5|C3UZE5_WHEAT Pathogenesis-related protein 1-1 OS=Triticum aestivum GN=Pr-1-1 PE=2 SV=1	11	8	2	68.9	56.7	8.5	17.635	323.31	116780000000	387	2.16601	0	-7.04977	-2.08984	26.117	28.2096	25.8397	26.8381	26.7277	27.1001	31.4924	34.624	35.1992	33.1177	32.5941	31.5805		C3UZE5	228480395	ACQ41880.1	pathogenisis-related protein 1.1	bread wheat	Triticum aestivum
	+	1.42709	-3.31929	D8L9Q1	D8L9Q1	tr|D8L9Q1|D8L9Q1_WHEAT Glucan endo-1,3-beta-glucosidase GII,putative, expressed OS=Triticum aestivum GN=TAA_ctg0661b.00060.1 PE=3 SV=1	12	8	4	48.7	40.1	18.7	35.257	323.31	6626300000	174	1.42709	0.0534286	-3.31929	-1.0769	27.3183	26.9493	24.3403	26.8939	27.2837	24.9128	28.5098	29.6958	30.3602	29.6161	28.8889	28.9803		D8L9Q1	300681514	CBH32608.1	glucan endo-1,3-beta-glucosidase GII precursor,putative, expressed	bread wheat	Triticum aestivum
	+	2.29997	-3.1999	D8L9Q2;A0A1D5VXX6	D8L9Q2;A0A1D5VXX6	tr|D8L9Q2|D8L9Q2_WHEAT Glucan endo-1,3-beta-glucosidase GII,putative, expressed OS=Triticum aestivum GN=TAA_ctg0661b.00070.1 PE=3 SV=1;tr|A0A1D5VXX6|A0A1D5VXX6_WHEAT Uncharacterized protein OS=Triticum aestivum PE=3 SV=1	14	14	8	60.4	60.4	35	35.042	323.31	125850000000	1157	2.29997	0.0104	-3.1999	-1.24411	30.028	31.148	30.4532	30.9482	31.1361	30.9919	32.8601	33.9059	34.4628	33.1738	32.8383	32.0254		D8L9Q2	300681515	CBH32609.1	glucan endo-1,3-beta-glucosidase GII precursor,putative, expressed	bread wheat	Triticum aestivum
	+	2.04597	-7.01183	O82714	O82714	tr|O82714|O82714_WHEAT Pathogenesis-related protein 1-3 OS=Triticum aestivum GN=PR-1.1 PE=2 SV=1	10	1	1	61	9.1	9.1	17.651	139.52	86636000000	136	2.04597	0	-7.01183	-2.01643	24.6354	27.4651	26.8136	26.3429	28.0302	26.7986	30.9644	34.0429	34.9424	32.6271	32.2241	31.3392		O82714	3702663	CAA07473.1	pathogenisis-related protein 1.1	bread wheat	Triticum aestivum
	+	2.25844	-5.06511	Q9XEN5	Q9XEN5	tr|Q9XEN5|Q9XEN5_WHEAT Beta-1,3-glucanase OS=Triticum aestivum GN=Glb3 PE=2 SV=1	12	6	4	59.3	35	23.1	34.881	323.31	29949000000	250	2.25844	0	-5.06511	-1.72883	25.6028	27.7919	26.359	26.7184	27.7526	27.7857	30.4632	31.6938	32.7921	30.9673	30.7024	30.9403		Q9XEN5	4741846	AAD28732.1	beta-1,3-glucanase precursor	bread wheat	Triticum aestivum
	+	1.95656	-2.89385	W5BRM7	W5BRM7	tr|W5BRM7|W5BRM7_WHEAT Uncharacterized protein OS=Triticum aestivum PE=4 SV=1	9	9	8	52.8	52.8	47.2	35.54	323.31	29576000000	1445	1.95656	0.068	-2.89385	-1.09325	29.2215	27.1915	27.8087	29.3262	31.7722	28.9169	30.8214	31.4369	30.645	29.4912	29.0076	30.0205		W5BRM7	1149781488	XP_020153601.1	26 kDa endochitinase 1-like	Aegilops tauschii subsp. tauschii	Aegilops tauschii subsp. tauschii
	+	2.10425	-5.10183	W5DDM8;W5DBH2;A0A1D5WA45	W5DDM8	tr|W5DDM8|W5DDM8_WHEAT Uncharacterized protein OS=Triticum aestivum PE=4 SV=1	8	8	5	43.9	43.9	27.4	24.534	281.75	17356000000	132	2.10425	0.026	-5.10183	-1.68122	25.4572	27.7414	26.1753	25.4966	27.8149	27.0485	30.4917	31.0982	33.0894	29.3701	30.8491	29.8346		W5DDM8	1149763663	XP_020147102.1	somatic embryogenesis receptor kinase 2-like	Aegilops tauschii subsp. tauschii	Aegilops tauschii subsp. tauschii
	+	1.66387	-3.02033	W5ERR3	W5ERR3	tr|W5ERR3|W5ERR3_WHEAT Uncharacterized protein OS=Triticum aestivum PE=3 SV=1	6	1	1	44.2	7.1	7.1	23.398	24.759	2260700000	45	1.66387	0.0493333	-3.02033	-1.0686	24.3264	26.206	25.6904	25.5863	26.2962	27.9189	27.4275	28.3321	29.5242	27.9043	27.5491	26.808		W5ERR3	1149791770	XP_020157319.1	oxalate oxidase GF-2.8-like	Aegilops tauschii subsp. tauschii	Aegilops tauschii subsp. tauschii
	+	1.35057	-3.4344	W5FXL5;A0A1D5YID7	W5FXL5	tr|W5FXL5|W5FXL5_WHEAT Dirigent protein OS=Triticum aestivum PE=3 SV=1	5	5	1	29.5	29.5	5.7	18.569	34.888	8135500000	126	1.35057	0.0575385	-3.4344	-1.07702	27.769	25.1586	27.0173	25.186	28.7284	27.3016	28.4053	30.3525	31.4904	29.5685	29.5177	24.9463		W5FXL5	1149737998	XP_020193121.1	dirigent protein 22-like	Aegilops tauschii subsp. tauschii	Aegilops tauschii subsp. tauschii
72h Th	+	2.43095	3.38723	A0A1D6C2S0;A0A1D6C2S1;A0A1D6C2R9;A0A1D6C2S2	A0A1D6C2S0;A0A1D6C2S1;A0A1D6C2R9	tr|A0A1D6C2S0|A0A1D6C2S0_WHEAT Xyloglucan endotransglucosylase/hydrolase OS=Triticum aestivum PE=3 SV=1;tr|A0A1D6C2S1|A0A1D6C2S1_WHEAT Xyloglucan endotransglucosylase/hydrolase OS=Triticum aestivum PE=3 SV=1;tr|A0A1D6C2R9|A0A1D6C2R9_WHEAT Xyloglucan endotr	9	2	1	43.4	16	5	31.146	208.83	16878000000	283	2.43095	0.07	3.38723	1.32444	30.3836	31.0174	28.4713	30.6073	31.9003	30.3272	27.7542	26.3382	26.4642	27.6841	27.9594	27.0296		A0A1D6C2S0	474151765	EMS56986.1	Xyloglucan endotransglucosylase/hydrolase protein 22	Triticum urartu	Triticum urartu
	+	3.54857	-5.54212	C3UZE5	C3UZE5	tr|C3UZE5|C3UZE5_WHEAT Pathogenesis-related protein 1-1 OS=Triticum aestivum GN=Pr-1-1 PE=2 SV=1	11	8	2	68.9	56.7	8.5	17.635	323.31	116780000000	387	3.54857	0	-5.54212	-2.24875	26.117	28.2096	25.8397	26.8381	26.7277	27.1001	31.4924	34.624	35.1992	33.1177	32.5941	31.5805		C3UZE5	228480395	ACQ41880.1	pathogenisis-related protein 1.1	bread wheat	Triticum aestivum
	+	2.86343	-5.00621	O82714	O82714	tr|O82714|O82714_WHEAT Pathogenesis-related protein 1-3 OS=Triticum aestivum GN=PR-1.1 PE=2 SV=1	10	1	1	61	9.1	9.1	17.651	139.52	86636000000	136	2.86343	0	-5.00621	-1.9025	24.6354	27.4651	26.8136	26.3429	28.0302	26.7986	30.9644	34.0429	34.9424	32.6271	32.2241	31.3392		O82714	3702663	CAA07473.1	pathogenisis-related protein 1.1	bread wheat	Triticum aestivum
	+	3.17773	-3.45111	Q9XEN5	Q9XEN5	tr|Q9XEN5|Q9XEN5_WHEAT Beta-1,3-glucanase OS=Triticum aestivum GN=Glb3 PE=2 SV=1	12	6	4	59.3	35	23.1	34.881	323.31	29949000000	250	3.17773	0	-3.45111	-1.46212	25.6028	27.7919	26.359	26.7184	27.7526	27.7857	30.4632	31.6938	32.7921	30.9673	30.7024	30.9403		Q9XEN5	4741846	AAD28732.1	beta-1,3-glucanase precursor	bread wheat	Triticum aestivum
5d Lr1	+	3.16792	-6.46894	A0A1D5S8C5	A0A1D5S8C5	tr|A0A1D5S8C5|A0A1D5S8C5_WHEAT Uncharacterized protein OS=Triticum aestivum PE=4 SV=1	1	9.7	9.7	9.7	15.339	0	96.263	159	24.8225	25.3488	25.3472	25.6203	31.2094	31.9478	30.8603	32.9462	31.1189	25.2926	32.5087	32.6356								A0A1D5S8C5	1149818574	XP_020167906.1	non-specific lipid-transfer protein 2P-like	Aegilops tauschii subsp. tauschii	Aegilops tauschii subsp. tauschii
	+	3.00968	-7.04879	A0A1D6C9I2	A0A1D6C9I2	tr|A0A1D6C9I2|A0A1D6C9I2_WHEAT Uncharacterized protein OS=Triticum aestivum PE=4 SV=1	7	38.6	38.6	38.6	26.151	0	211.44	186	25.8869	26.7077	24.9497	24.3891	25.0792	24.0729	34.1513	32.4519	32.0873	32.117	30.7093	29.3903								A0A1D6C9I2	1149723491	XP_020187657.1	chitinase 8-like	Aegilops tauschii subsp. tauschii	Aegilops tauschii subsp. tauschii
	+	3.19367	-7.9755	A0A1D6DM41	A0A1D6DM41	tr|A0A1D6DM41|A0A1D6DM41_WHEAT Uncharacterized protein OS=Triticum aestivum PE=3 SV=1	3	17.5	17.5	17.5	24.466	0	171.42	92	24.622	25.0306	25.7114	23.6565	24.9884	24.9006	34.6193	32.342	32.3292	31.782	30.8547	28.674								A0A1D6DM41	1149820907	XP_020168891.1	zingipain-2-like	Aegilops tauschii subsp. tauschii	Aegilops tauschii subsp. tauschii
	+	2.74346	-7.60195	F8S6T5;A0A0A7ACK5	F8S6T5;A0A0A7ACK5	tr|F8S6T5|F8S6T5_WHEAT Pathogenesis-related protein 1-5 OS=Triticum aestivum GN=Pr-1-5 PE=2 SV=1;tr|A0A0A7ACK5|A0A0A7ACK5_WHEAT Pathogenesis-related protein 1-5 OS=Triticum aestivum GN=Pr-1-5 PE=3 SV=1	2	53.7	15.2	15.2	17.55	0	54.578	127	25.5704	25.0563	27.3242	25.0707	25.1616	24.8445	34.5859	34.0986	32.0723	32.0862	32.7216	25.4523								F8S6T5	334903120	AEH25620.1	pathogenesis-related protein 1-5	bread wheat	Triticum aestivum
	+	4.44858	6.66361	W5D2I6;Q9ATG4;L7Q3U1	W5D2I6;Q9ATG4;L7Q3U1	tr|W5D2I6|W5D2I6_WHEAT Non-specific lipid-transfer protein OS=Triticum aestivum GN=TRAES_3BF088300010CFD_c1 PE=3 SV=1;tr|Q9ATG4|Q9ATG4_WHEAT Non-specific lipid-transfer protein OS=Triticum aestivum GN=LTP2 PE=2 SV=1;tr|L7Q3U1|L7Q3U1_WHEAT Non-specific lipi	2	14.8	14.8	14.8	11.228	0	30.671	43	32.5141	31.9394	32.0041	32.832	32.6049	31.8941	25.9385	24.9877	25.5406	25.3611	30.666	23.7915								W5D2I6	13375563	AAK20395.1	lipid transfer protein precursor	bread wheat	Triticum aestivum
5d Th	+	1.16559	-3.80175	A0A023W4N4;A0A023W4F1	A0A023W4N4;A0A023W4F1	tr|A0A023W4N4|A0A023W4N4_WHEAT Endochitinase OS=Triticum aestivum PE=4 SV=1;tr|A0A023W4F1|A0A023W4F1_WHEAT Endochitinase OS=Triticum aestivum PE=4 SV=1	6	3	3	31.4	24.2	24.2	33.526	323.31	40197000000	204	1.16559	0.0256	-3.80175	-1.25317	28.7963	32.9177	29.7141	27.562	25.9626	30.6962	31.8234	31.7233	30.5191	30.5981	32.7012	32.3268	A0A023W4N4	#N/A	#N/A	#N/A	#N/A	#N/A
	+	1.6195	-3.66792	A0A1D5WLX4;A0A0H4TIG5;A0A023W594	A0A1D5WLX4;A0A0H4TIG5;A0A023W594	tr|A0A1D5WLX4|A0A1D5WLX4_WHEAT Uncharacterized protein OS=Triticum aestivum PE=4 SV=1;tr|A0A0H4TIG5|A0A0H4TIG5_WHEAT Chitinase OS=Triticum aestivum PE=4 SV=1;tr|A0A023W594|A0A023W594_WHEAT Endochitinase OS=Triticum aestivum PE=4 SV=1	6	6	1	26.5	26.5	8.5	33.406	323.31	321900000000	639	1.6195	0.0165794	-3.66792	-1.44625	31.6428	34.7819	32.6506	30.2807	32.1029	32.2974	34.2462	35.1817	33.2279	33.7106	35.4814	36.4929	A0A1D5WLX4	1149763830	XP_020147158.1	basic endochitinase A-like	Aegilops tauschii subsp. tauschii	Aegilops tauschii subsp. tauschii
	+	1.87808	-3.11544	A0A0H4TM98;A0A023W638;A0A023W5U7	A0A0H4TM98;A0A023W638;A0A023W5U7	tr|A0A0H4TM98|A0A0H4TM98_WHEAT Chitinase OS=Triticum aestivum PE=4 SV=1;tr|A0A023W638|A0A023W638_WHEAT Endochitinase OS=Triticum aestivum PE=4 SV=1;tr|A0A023W5U7|A0A023W5U7_WHEAT Endochitinase OS=Triticum aestivum PE=4 SV=1	6	1	1	26.2	6.9	6.9	33.565	100.32	93131000000	319	1.87808	0.018153	-3.11544	-1.3943	30.1934	32.905	31.8095	29.6569	30.6415	30.101	32.1046	33.501	31.7335	31.9977	33.4252	34.3228	A0A0H4TM98	880797018	AKQ09033.1	chitinase	bread wheat	Triticum aestivum
	+	2.00428	-2.74839	A0A075TNZ7;P11534;S4Z0E9;A0A1D6BS64;A0A1D6AJK3	A0A075TNZ7;P11534	tr|A0A075TNZ7|A0A075TNZ7_WHEAT 50S ribosomal protein L2, chloroplastic OS=Triticum aestivum GN=rpl2 PE=3 SV=1;sp|P11534|RK2_WHEAT 50S ribosomal protein L2, chloroplastic OS=Triticum aestivum GN=rpl2-A PE=3 SV=2	5	5	5	26.7	26.7	26.7	30.487	203.38	6983600000	70	2.00428	0.0202054	-2.74839	-1.31173	27.5527	28.6967	28.2189	25.4494	27.0346	26.6182	28.5401	28.4634	30.8388	28.4817	29.1397	29.7261	A0A075TNZ7	953245249	YP_009180548.1	ribosomal protein L2 (chloroplast)	Aegilops crassa;Aegilops bicornis;Aegilops comosa;Aegilops longissima;Aegilops searsii;Aegilops umbellulata;Aegilops uniaristata;Aegilops columnaris;Aegilops markgrafii;Hordeum vulgare;Hordeum bulbosum;seaside barley;rye;bread wheat;Triticum monococcum;Triticum timopheevii;Triticum turgidum;Triticum urartu;Aegilops speltoides;Psathyrostachys juncea;Thinopyrum elongatum;Agropyron cristatum;Amblyop…	Aegilops crassa;Aegilops bicornis;Aegilops comosa;Aegilops longissima;Aegilops searsii;Aegilops umbellulata;Aegilops uniaristata;Aegilops columnaris;Aegilops markgrafii;Hordeum vulgare;Hordeum bulbosum;Hordeum marinum;Secale cereale;Triticum aestivum;Triticum monococcum;Triticum timopheevii;Triticum turgidum;Triticum urartu;Aegilops speltoides;Psathyrostachys juncea;Thinopyrum elongatum;Agropyron…
	+	1.32925	-3.48974	A0A1D5WJN2;A0A077RAG2;W5F994;W5EXR5	A0A1D5WJN2;A0A077RAG2	tr|A0A1D5WJN2|A0A1D5WJN2_WHEAT Uncharacterized protein OS=Triticum aestivum PE=3 SV=1;tr|A0A077RAG2|A0A077RAG2_WHEAT Uncharacterized protein OS=Triticum aestivum GN=TRAES_3BF151800050CFD_c1 PE=3 SV=1	4	4	2	45.3	45.3	18.2	15.04	231.62	6614500000	52	1.32925	0.0233094	-3.48974	-1.27892	24.5137	26.209	25.032	23.8553	26.5524	26.7561	30.9743	29.5534	29.6408	28.1715	30.778	28.6836	A0A1D5WJN2	1149751790	XP_020198267.1	cytochrome b5-like	Aegilops tauschii subsp. tauschii	Aegilops tauschii subsp. tauschii
	+	2.50102	-4.31366	A0A1D5W4S5;Q41539;A0A077RF77	A0A1D5W4S5;Q41539;A0A077RF77	tr|A0A1D5W4S5|A0A1D5W4S5_WHEAT Uncharacterized protein OS=Triticum aestivum PE=4 SV=1;tr|Q41539|Q41539_WHEAT Endochitinase OS=Triticum aestivum GN=CHI PE=4 SV=1;tr|A0A077RF77|A0A077RF77_WHEAT Chitinase OS=Triticum aestivum GN=TRAES_3BF280800020CFD_c1 PE=4	6	1	0	31.7	10.2	0	27.942	323.31	16111000000	1082	2.50102	0.00832479	-4.31366	-1.97916	25.0909	28.8007	25.6287	24.9118	24.6782	23.9307	28.9796	29.8374	28.0988	27.83	28.6939	29.9378	A0A1D5W4S5	1149763830	XP_020147158.1	basic endochitinase A-like	Aegilops tauschii subsp. tauschii	Aegilops tauschii subsp. tauschii
	+	2.00735	2.41503	A0A077RQU9;A0A1D5WWG2;A0A1D5WWG3	A0A077RQU9;A0A1D5WWG2;A0A1D5WWG3	tr|A0A077RQU9|A0A077RQU9_WHEAT Uncharacterized protein OS=Triticum aestivum GN=TRAES_3BF089800030CFD_c1 PE=4 SV=1;tr|A0A1D5WWG2|A0A1D5WWG2_WHEAT Uncharacterized protein OS=Triticum aestivum PE=4 SV=1;tr|A0A1D5WWG3|A0A1D5WWG3_WHEAT Uncharacterized protein O	5	5	1	16.8	16.8	2.4	41.598	11.675	1794300000	32	2.00735	0.0308923	2.41503	1.19439	27.7624	26.988	27.3987	27.234	27.7869	27.4838	23.8693	26.9094	24.8408	26.0014	24.9651	24.293	A0A077RQU9	1149722934	XP_020187372.1	protein trichome birefringence-like 38	Aegilops tauschii subsp. tauschii	Aegilops tauschii subsp. tauschii
	+	1.69943	-2.64895	A0A077S0N0	A0A077S0N0	tr|A0A077S0N0|A0A077S0N0_WHEAT Uncharacterized protein OS=Triticum aestivum GN=TRAES_3BF061600080CFD_c1 PE=3 SV=1	12	11	7	40.5	40.5	24.9	34.386	323.31	153120000000	845	1.69943	0.0294248	-2.64895	-1.2004	30.7312	30.4195	31.2744	29.5652	30.328	29.2087	35.8123	34.2774	33.6512	33.3763	32.4533	31.2191	A0A077S0N0	1149763711	XP_020147117.1	glucan endo-1,3-beta-glucosidase, acidic isoform-like	Aegilops tauschii subsp. tauschii	Aegilops tauschii subsp. tauschii
	+	4.49047	-7.02544	Q9SQG8;A0A1D5W2F2;A0A080YUA6	Q9SQG8;A0A1D5W2F2;A0A080YUA6	tr|Q9SQG8|Q9SQG8_WHEAT Pathogenesis-related protein 4 (Fragment) OS=Triticum aestivum GN=PR4 PE=2 SV=1;tr|A0A1D5W2F2|A0A1D5W2F2_WHEAT Uncharacterized protein OS=Triticum aestivum PE=4 SV=1;tr|A0A080YUA6|A0A080YUA6_WHEAT Uncharacterized protein OS=Triticum	2	1	1	16.7	10.8	10.8	13.094	122.17	52777000000	135	4.49047	0	-7.02544	-3.81862	25.6425	30.9514	25.7171	25.6455	24.4784	25.0136	33.2443	32.8588	31.0826	32.0172	32.045	32.1517	Q9SQG8	6002595	AAF00050.1	pathogenesis-related protein 4, partial	bread wheat	Triticum aestivum
	+	1.12212	-2.9326	A0A0C4BJ10;A0A096ULK3;A0A0M4AX85;A0A1D5V4W0;W5CDA5;tr|A0A0C4EVF0|A0A0C4EVF0_PUCT1	A0A0C4BJ10;A0A096ULK3;A0A0M4AX85;A0A1D5V4W0;W5CDA5	tr|A0A0C4BJ10|A0A0C4BJ10_WHEAT Rab18s OS=Triticum aestivum PE=2 SV=1;tr|A0A096ULK3|A0A096ULK3_WHEAT Uncharacterized protein OS=Triticum aestivum PE=4 SV=1;tr|A0A0M4AX85|A0A0M4AX85_WHEAT Rab18l OS=Triticum aestivum PE=2 SV=1;tr|A0A1D5V4W0|A0A1D5V4W0_WHEAT U	5	5	5	15.8	15.8	15.8	37.621	9.8123	1678600000	29	2.02632	0.0186354	2.92332	1.37635	27.3645	27.7448	27.0472	28.711	27.5278	27.6905	24.8112	26.325	26.0164	25.9888	24.269	24.9015	A0A0C4BJ10	#N/A	#N/A	#N/A	#N/A	#N/A
	+	2.02632	2.92332	W5BBN4;A0A096UN06;W5AX04	W5BBN4;A0A096UN06;W5AX04	tr|W5BBN4|W5BBN4_WHEAT Peroxidase OS=Triticum aestivum PE=3 SV=1;tr|A0A096UN06|A0A096UN06_WHEAT Peroxidase OS=Triticum aestivum PE=3 SV=1;tr|W5AX04|W5AX04_WHEAT Peroxidase OS=Triticum aestivum PE=3 SV=1	17	5	2	81.8	25.8	13.7	33.267	323.31	134780000000	824	2.56594	0.0132326	-3.03139	-1.54768	31.2838	32.8965	31.2763	30.0606	30.6191	30.2767	34.2605	33.7915	33.5541	32.9181	32.9245	34.208	W5BBN4	1149790286	XP_020156770.1	peroxidase 1-like	Aegilops tauschii subsp. tauschii	Aegilops tauschii subsp. tauschii
	+	2.56594	-3.03139	A0A0A7AC77;A0A1D6D7A2;A0A1D5WFF4	A0A0A7AC77;A0A1D6D7A2;A0A1D5WFF4	tr|A0A0A7AC77|A0A0A7AC77_WHEAT Beta-1,3-endoglucanase (Fragment) OS=Triticum aestivum GN=PR-2-1b PE=2 SV=1;tr|A0A1D6D7A2|A0A1D6D7A2_WHEAT Uncharacterized protein OS=Triticum aestivum PE=3 SV=1;tr|A0A1D5WFF4|A0A1D5WFF4_WHEAT Uncharacterized protein OS=Triti	18	1	1	41.3	5.9	5.9	54.376	134.34	2960000000	48	2.55697	0.0102375	-3.83338	-1.84009	27.1043	28.9591	23.1582	25.3514	23.7534	23.5584	25.3129	24.8153	24.4132	28.244	27.799	28.1203	A0A0A7AC77	570339394	AHE76176.1	beta-1,3-endoglucanase, partial	bread wheat	Triticum aestivum
	+	2.55697	-3.83338	W5FC96;A0A0F6QT98;A0A1D5YWY4;A0A1D5YWY6	W5FC96;A0A0F6QT98;A0A1D5YWY4;A0A1D5YWY6	tr|W5FC96|W5FC96_WHEAT Uncharacterized protein OS=Triticum aestivum PE=3 SV=1;tr|A0A0F6QT98|A0A0F6QT98_WHEAT Aldehyde dehydrogenase 7B1 OS=Triticum aestivum GN=ALDH7B1 PE=2 SV=1;tr|A0A1D5YWY4|A0A1D5YWY4_WHEAT Uncharacterized protein OS=Triticum aestivum PE	9	9	9	31.8	31.8	31.8	36.909	187.13	4219800000	100	1.76	0.0191628	-3.16791	-1.3714	26.9113	25.1404	28.5501	25.5827	26.7366	24.151	29.1011	29.2945	28.9801	28.0413	29.0382	28.8944	W5FC96	1149725055	XP_020188423.1	aldehyde dehydrogenase family 7 member A1	bread wheat;Aegilops tauschii subsp. tauschii	Triticum aestivum;Aegilops tauschii subsp. tauschii
	+	1.76	-3.16791	A0A1D5SZV4;A0A1D5RQ31;A0A1D5S9Q1;A0A1D5SZV5;A0A1D5S9Q2	A0A1D5SZV4;A0A1D5RQ31;A0A1D5S9Q1;A0A1D5SZV5;A0A1D5S9Q2	tr|A0A1D5SZV4|A0A1D5SZV4_WHEAT Uncharacterized protein OS=Triticum aestivum PE=4 SV=1;tr|A0A1D5RQ31|A0A1D5RQ31_WHEAT Uncharacterized protein OS=Triticum aestivum PE=4 SV=1;tr|A0A1D5S9Q1|A0A1D5S9Q1_WHEAT Uncharacterized protein OS=Triticum aestivum PE=4 SV=	14	7	6	30.5	14.9	14.9	59.644	323.31	91397000000	379	1.6699	0.0328745	-2.61133	-1.18081	31.21	31.2169	31.1883	30.078	31.8507	30.6125	31.6076	32.8408	31.5298	32.5493	34.181	33.6448	A0A1D5SZV4	1338480446	POO02360.1	WAT1-related protein	Trema orientale	Trema orientale
	+	1.6699	-2.61133	A0A1D5RUC5;A0A1D5RUC6;A0A1D5RUC7	A0A1D5RUC5;A0A1D5RUC6;A0A1D5RUC7	tr|A0A1D5RUC5|A0A1D5RUC5_WHEAT Uncharacterized protein OS=Triticum aestivum PE=3 SV=1;tr|A0A1D5RUC6|A0A1D5RUC6_WHEAT Uncharacterized protein OS=Triticum aestivum PE=3 SV=1;tr|A0A1D5RUC7|A0A1D5RUC7_WHEAT Uncharacterized protein OS=Triticum aestivum PE=3 SV=	9	7	4	63.8	54.2	38.4	18.092	25.937	12306000000	65	3.1236	0.00475472	-4.78802	-2.37458	24.5307	28.8528	30.4874	24.7392	26.0191	25.7433	29.5214	30.6135	30.5457	30.8302	30.373	29.6626	A0A1D5RUC5	1149709035	XP_020180603.1	glucan endo-1,3-beta-glucosidase 13-like	Aegilops tauschii subsp. tauschii	Aegilops tauschii subsp. tauschii
	+	3.1236	-4.78802	A0A1D5RV09	A0A1D5RV09	tr|A0A1D5RV09|A0A1D5RV09_WHEAT Uncharacterized protein OS=Triticum aestivum PE=3 SV=1	3	3	3	23.7	23.7	23.7	14.867	33.805	2592800000	48	5.74958	0.00562712	-3.61984	-2.28445	24.9053	24.9713	27.832	24.6985	24.9555	24.8066	27.0902	28.2189	27.6375	28.4371	28.5107	28.3722	A0A1D5RV09	1149840922	XP_020176364.1	50S ribosomal protein L12, chloroplastic-like	Aegilops tauschii subsp. tauschii	Aegilops tauschii subsp. tauschii
	+	5.74958	-3.61984	A0A1D5S6Z7;S5VJ63;W5AGW5;S5WAC6;S5VC68;A0A1D5RWH8	A0A1D5S6Z7;S5VJ63;W5AGW5;S5WAC6;S5VC68;A0A1D5RWH8	tr|A0A1D5S6Z7|A0A1D5S6Z7_WHEAT Peptidylprolyl isomerase OS=Triticum aestivum PE=4 SV=1;tr|S5VJ63|S5VJ63_WHEAT Peptidylprolyl isomerase (Fragment) OS=Triticum aestivum PE=4 SV=1;tr|W5AGW5|W5AGW5_WHEAT Peptidylprolyl isomerase OS=Triticum aestivum PE=4 SV=1;	5	1	1	49.5	10.3	10.3	11.757	3.8382	5425900000	28	1.34644	0.0241981	-3.40478	-1.26929	24.4339	26.2183	27.3719	25.0493	24.5547	24.6442	24.5622	29.1713	25.1621	25.8163	29.4837	29.1624	A0A1D5S6Z7	529205473	AGS77297.1	FKBP-B1a, partial	bread wheat	Triticum aestivum
	+	1.34644	-3.40478	A0A1D5S036	A0A1D5S036	tr|A0A1D5S036|A0A1D5S036_WHEAT Cysteine proteinase inhibitor OS=Triticum aestivum PE=3 SV=1	2	1	1	26.4	17	17	10.855	289.25	33566000000	117	3.2072	0.033428	-2.0085	-1.17727	29.1737	29.5489	28.7139	28.99	29.097	28.6612	32.8565	33.0141	31.094	31.1901	30.9433	30.6404	A0A1D5S036	1149741250	XP_020194312.1	cysteine proteinase inhibitor	Aegilops tauschii subsp. tauschii	Aegilops tauschii subsp. tauschii
	+	3.2072	-2.0085	A0A1D5SA13	A0A1D5SA13	tr|A0A1D5SA13|A0A1D5SA13_WHEAT Uncharacterized protein OS=Triticum aestivum PE=4 SV=1	4	4	4	35.4	35.4	35.4	14.015	62.564	2124300000	36	3.51	0.0190643	-2.31178	-1.3613	25.3313	24.8684	24.8031	25.1386	25.5505	25.4075	28.5659	27.4836	28.3076	27.944	27.3997	27.6882	A0A1D5SA13	1149717010	XP_020184520.1	chitinase 8-like	Aegilops tauschii subsp. tauschii	Aegilops tauschii subsp. tauschii
	+	3.51	-2.31178	A0A1D5SLF7;A0A1D5T1I6;A0A1D6DBS5;A0A1D6DBS6	A0A1D5SLF7;A0A1D5T1I6;A0A1D6DBS5;A0A1D6DBS6	tr|A0A1D5SLF7|A0A1D5SLF7_WHEAT Uncharacterized protein OS=Triticum aestivum PE=4 SV=1;tr|A0A1D5T1I6|A0A1D5T1I6_WHEAT Uncharacterized protein OS=Triticum aestivum PE=4 SV=1;tr|A0A1D6DBS5|A0A1D6DBS5_WHEAT Uncharacterized protein OS=Triticum aestivum PE=4 SV=	11	4	4	28.2	12.7	12.7	60.652	64.298	1496500000	52	2.08897	0.0252459	-2.55188	-1.26163	25.6791	25.3601	24.8155	24.5308	24.9467	25.0793	26.3066	28.3873	27.1532	26.5522	28.2698	27.3904	A0A1D5SLF7	1126498988	APR64144.1	DNA-binding family protein-like 2	Populus tomentosa	Populus tomentosa
	+	2.08897	-2.55188	A0A1D5SQE4;A0A1D5SC31;A0A1D5RSC4	A0A1D5SQE4;A0A1D5SC31;A0A1D5RSC4	tr|A0A1D5SQE4|A0A1D5SQE4_WHEAT Uncharacterized protein OS=Triticum aestivum PE=3 SV=1;tr|A0A1D5SC31|A0A1D5SC31_WHEAT Uncharacterized protein OS=Triticum aestivum PE=3 SV=1;tr|A0A1D5RSC4|A0A1D5RSC4_WHEAT Uncharacterized protein OS=Triticum aestivum PE=3 SV=	3	3	2	14.9	14.9	10.1	35.057	33.302	1666000000	28	1.77865	0.0476385	2.25289	1.08909	25.5642	27.5766	25.6054	27.6447	27.8754	27.2394	24.8518	28.2342	24.3906	24.4085	25.3224	26.2699	A0A1D5SQE4	1149709033	XP_020180602.1	glucan endo-1,3-beta-glucosidase 13-like isoform X2	Aegilops tauschii subsp. tauschii	Aegilops tauschii subsp. tauschii
	+	2.46978	-4.12811	A0A1D5SUC7	A0A1D5SUC7	tr|A0A1D5SUC7|A0A1D5SUC7_WHEAT Uncharacterized protein OS=Triticum aestivum PE=3 SV=1	12	7	3	26.8	16	7.8	59.738	162.67	10028000000	72	2.46978	0.00822311	-4.12811	-1.90842	25.6661	28.1916	24.4017	25.9345	27.3725	25.3001	30.3276	30.0254	29.623	30.8358	30.0833	30.0723	A0A1D5SUC7	1149709023	XP_020180596.1	glucan endo-1,3-beta-glucosidase 13-like isoform X2	Aegilops tauschii subsp. tauschii	Aegilops tauschii subsp. tauschii
	+	4.56506	-3.14241	A0A1D5SY64	A0A1D5SY64	tr|A0A1D5SY64|A0A1D5SY64_WHEAT Uncharacterized protein OS=Triticum aestivum PE=4 SV=1	8	2	2	33.8	12.6	12.6	32.597	68.048	4856500000	35	4.56506	0.008256	-3.14241	-1.90964	25.8303	26.215	24.0866	25.6672	25.5938	25.7684	28.9351	28.7935	29.2407	29.0832	28.7456	28.6278	A0A1D5SY64	721660826	XP_010235017.1	haloacid dehalogenase-like hydrolase domain-containing protein Sgpp isoform X2	stiff brome	Brachypodium distachyon
	+	3.51446	-2.11428	A0A1D5SZT2	A0A1D5SZT2	tr|A0A1D5SZT2|A0A1D5SZT2_WHEAT Uncharacterized protein OS=Triticum aestivum PE=4 SV=1	13	13	0	36.1	36.1	0	60.547	25.24	1328900000	27	3.51446	0.0257196	-2.11428	-1.25789	25.4091	25.3219	25.5396	25.274	24.8244	24.6857	26.9613	25.0202	27.1375	27.0836	27.0688	26.9744	A0A1D5SZT2	1149796657	XP_020159217.1	phenylalanine--tRNA ligase beta subunit, cytoplasmic-like isoform X1	Aegilops tauschii subsp. tauschii	Aegilops tauschii subsp. tauschii
	+	2.4987	-4.1657	A0A1D5T695;A0A1D5UQZ5	A0A1D5T695;A0A1D5UQZ5	tr|A0A1D5T695|A0A1D5T695_WHEAT Uncharacterized protein OS=Triticum aestivum PE=3 SV=1;tr|A0A1D5UQZ5|A0A1D5UQZ5_WHEAT Uncharacterized protein OS=Triticum aestivum PE=3 SV=1	7	7	6	35.4	35.4	35.4	16.113	135.9	7748000000	51	2.4987	0.00856432	-4.1657	-1.93109	26.3457	25.6093	24.9915	24.192	24.7761	26.0339	31.0589	26.2683	30.995	28.6512	28.965	29.8829	A0A1D5T695	1149831056	XP_020172516.1	60S ribosomal protein L23A-like	bread wheat;Triticum sp.;Aegilops tauschii subsp. tauschii	Triticum aestivum;Triticum sp.;Aegilops tauschii subsp. tauschii
	+	1.71854	-2.746	A0A1D5T6G0;A0A1D5T6G1	A0A1D5T6G0;A0A1D5T6G1	tr|A0A1D5T6G0|A0A1D5T6G0_WHEAT Uncharacterized protein OS=Triticum aestivum PE=3 SV=1;tr|A0A1D5T6G1|A0A1D5T6G1_WHEAT Uncharacterized protein OS=Triticum aestivum PE=3 SV=1	20	3	2	50.6	10.1	8.5	54.626	64.83	2265000000	30	1.71854	0.0271579	-2.746	-1.23538	25.159	25.4394	26.7223	24.4469	24.1486	26.3724	28.8791	26.7662	28.1027	28.054	27.7607	27.3912	A0A1D5T6G0	1149810339	XP_020164478.1	betaine aldehyde dehydrogenase	bread wheat;Aegilops tauschii subsp. tauschii	Triticum aestivum;Aegilops tauschii subsp. tauschii
	+	2.05137	-5.63855	A0A1D5TI66;W5BBB2;W5FEA8;A0A1D5ZVJ4	A0A1D5TI66	tr|A0A1D5TI66|A0A1D5TI66_WHEAT Uncharacterized protein OS=Triticum aestivum PE=3 SV=1	6	6	4	22.2	22.2	15.6	37.12	313.37	63791000000	201	2.05137	0.00702392	-5.63855	-2.10098	27.7689	25.7451	25.6267	26.9292	25.6158	23.9632	34.6493	33.1779	32.1701	32.3635	31.4655	29.5949	A0A1D5TI66	1149820911	XP_020168893.1	ervatamin-C-like	Aegilops tauschii subsp. tauschii	Aegilops tauschii subsp. tauschii
	+	3.07162	-2.70635	A0A1D5TN46;A0A1D5TN47;A0A1D5V3G5;A0A1D5TN45	A0A1D5TN46;A0A1D5TN47;A0A1D5V3G5	tr|A0A1D5TN46|A0A1D5TN46_WHEAT Uncharacterized protein OS=Triticum aestivum PE=3 SV=1;tr|A0A1D5TN47|A0A1D5TN47_WHEAT Uncharacterized protein OS=Triticum aestivum PE=3 SV=1;tr|A0A1D5V3G5|A0A1D5V3G5_WHEAT Uncharacterized protein OS=Triticum aestivum PE=3 SV=	5	5	2	37.2	37.2	13.9	15.01	51.992	2757900000	36	3.07162	0.0147209	-2.70635	-1.50262	25.3029	23.8358	24.9714	25.1715	25.2123	25.46	28.5293	27.7582	29.1145	27.5785	27.8429	28.5415	A0A1D5TN46	1149720082	XP_020185985.1	60S ribosomal protein L27a-3-like	Aegilops tauschii subsp. tauschii	Aegilops tauschii subsp. tauschii
	+	2.47009	-2.66501	A0A1D5TQY9;Q43219	A0A1D5TQY9;Q43219	tr|A0A1D5TQY9|A0A1D5TQY9_WHEAT Peroxidase OS=Triticum aestivum PE=3 SV=1;tr|Q43219|Q43219_WHEAT Peroxidase (Fragment) OS=Triticum aestivum GN=pox3 PE=2 SV=1	12	8	1	54.2	39.4	9.6	32.611	323.31	64890000000	374	2.47009	0.0182663	-2.66501	-1.38227	30.5347	30.1269	30.1019	29.7786	28.372	29.2749	34.02	33.9907	32.3327	31.9595	31.886	31.5751	A0A1D5TQY9	57635147	AAW52715.1	peroxidase 1	Triticum monococcum	Triticum monococcum
	+	2.6079	-3.94025	A0A1D5U0A3	A0A1D5U0A3	tr|A0A1D5U0A3|A0A1D5U0A3_WHEAT Uncharacterized protein OS=Triticum aestivum PE=4 SV=1	8	8	2	61.2	61.2	22.5	14.836	183.54	3677100000	55	2.6079	0.00916996	-3.94025	-1.89351	27.5108	24.9531	28.381	24.6886	25.8615	23.8852	28.8831	28.6906	28.3299	28.584	28.778	28.8941	A0A1D5U0A3	1149784493	XP_020154590.1	prefoldin subunit 1	bread wheat;Aegilops tauschii subsp. tauschii	Triticum aestivum;Aegilops tauschii subsp. tauschii
	+	1.1768	3.09388	A0A1D5U305;A0A1D5U304;A0A1D5UKP8	A0A1D5U305;A0A1D5U304;A0A1D5UKP8	tr|A0A1D5U305|A0A1D5U305_WHEAT Superoxide dismutase OS=Triticum aestivum PE=3 SV=1;tr|A0A1D5U304|A0A1D5U304_WHEAT Superoxide dismutase OS=Triticum aestivum PE=3 SV=1;tr|A0A1D5UKP8|A0A1D5UKP8_WHEAT Superoxide dismutase OS=Triticum aestivum PE=3 SV=1	11	2	2	61.3	11.1	11.1	24.603	13.159	5534900000	34	1.1768	0.0390902	3.09388	1.13076	28.6548	24.7109	30.0197	29.4865	25.6649	29.0368	27.7928	25.8335	24.3864	24.4324	25.1648	25.3094	A0A1D5U305	#N/A	#N/A	#N/A	#N/A	#N/A
	+	3.6392	-3.51752	A0A1D5UDE6;A0A1D5UDE8;A0A1D5UDE7;A0A1D5UYD0;A0A1D5TIQ1	A0A1D5UDE6;A0A1D5UDE8;A0A1D5UDE7;A0A1D5UYD0	tr|A0A1D5UDE6|A0A1D5UDE6_WHEAT Uncharacterized protein OS=Triticum aestivum PE=4 SV=1;tr|A0A1D5UDE8|A0A1D5UDE8_WHEAT Uncharacterized protein OS=Triticum aestivum PE=4 SV=1;tr|A0A1D5UDE7|A0A1D5UDE7_WHEAT Uncharacterized protein OS=Triticum aestivum PE=4 SV=	5	5	5	15.9	15.9	15.9	51.029	37.159	3274300000	30	3.6392	0.00828936	-3.51752	-1.97667	27.4922	27.3718	27.7891	24.3064	24.13	24.8727	29.29	28.9469	24.3489	27.6286	28.0496	28.1835	A0A1D5UDE6	1149710662	XP_020181404.1	polyadenylate-binding protein RBP45-like isoform X1	bread wheat;Aegilops tauschii subsp. tauschii	Triticum aestivum;Aegilops tauschii subsp. tauschii
	+	1.8224	-2.29052	A0A1D5UDZ1;A0A1D5UDZ2;A0A1D5UDZ0;A0A1D5TN50;A0A1D5TPF6	A0A1D5UDZ1;A0A1D5UDZ2;A0A1D5UDZ0;A0A1D5TN50	tr|A0A1D5UDZ1|A0A1D5UDZ1_WHEAT Uncharacterized protein OS=Triticum aestivum PE=4 SV=1;tr|A0A1D5UDZ2|A0A1D5UDZ2_WHEAT Uncharacterized protein OS=Triticum aestivum PE=4 SV=1;tr|A0A1D5UDZ0|A0A1D5UDZ0_WHEAT Uncharacterized protein OS=Triticum aestivum PE=4 SV=	3	3	3	10.7	10.7	10.7	37.179	12.095	952360000	20	1.8224	0.0428065	-2.29052	-1.11143	26.1912	25.3028	26.2827	25.8802	24.6567	24.0635	24.649	26.8424	26.6792	27.4687	26.8883	27.1149	A0A1D5UDZ1	1149801827	XP_020161209.1	anthocyanidin reductase ((2S)-flavan-3-ol-forming)-like isoform X1	Aegilops tauschii subsp. tauschii	Aegilops tauschii subsp. tauschii
	+	1.62926	3.96334	W5BGQ0;A0A1D5UG19	W5BGQ0;A0A1D5UG19	tr|W5BGQ0|W5BGQ0_WHEAT Uncharacterized protein OS=Triticum aestivum PE=4 SV=1;tr|A0A1D5UG19|A0A1D5UG19_WHEAT Uncharacterized protein OS=Triticum aestivum PE=4 SV=1	1	1	1	11.8	11.8	11.8	12.014	7.2612	12006000000	45	1.62926	0.0139529	3.96334	1.5175	28.0677	31.0753	30.5805	29.8805	27.9633	30.4387	24.8614	30.785	25.3644	24.9027	27.0812	24.4085	W5BGQ0	1149818054	XP_020167693.1	non-specific lipid-transfer protein 4-like	bread wheat;Aegilops tauschii subsp. tauschii	Triticum aestivum;Aegilops tauschii subsp. tauschii
	+	1.1883	-3.48518	A0A1D5UG31;A0A1D5UG29	A0A1D5UG31;A0A1D5UG29	tr|A0A1D5UG31|A0A1D5UG31_WHEAT Uncharacterized protein OS=Triticum aestivum PE=4 SV=1;tr|A0A1D5UG29|A0A1D5UG29_WHEAT Uncharacterized protein OS=Triticum aestivum PE=4 SV=1	19	2	0	51.5	4.1	0	55.284	17.109	6218600000	37	1.1883	0.029069	-3.48518	-1.21065	26.1272	27.3152	28.4773	24.7412	28.6553	24.4303	25.3355	29.6232	27.8226	28.9685	29.6415	29.6723	A0A1D5UG31	#N/A	#N/A	#N/A	#N/A	#N/A
	+	0.798537	-4.01196	A0A1D5UH99;W5BGF3;A0A1D5UHA0	A0A1D5UH99;W5BGF3;A0A1D5UHA0	tr|A0A1D5UH99|A0A1D5UH99_WHEAT Uncharacterized protein OS=Triticum aestivum PE=4 SV=1;tr|W5BGF3|W5BGF3_WHEAT Uncharacterized protein OS=Triticum aestivum PE=4 SV=1;tr|A0A1D5UHA0|A0A1D5UHA0_WHEAT Uncharacterized protein OS=Triticum aestivum PE=4 SV=1	11	11	1	36.6	36.6	8.4	28.645	245.14	16986000000	150	1.72662	0.0132727	-3.9177	-1.55134	28.7074	27.6301	29.3658	29.27	25.7807	27.201	30.41	30.1764	29.9546	31.6395	31.2591	31.1063	A0A1D5UH99	1149720681	XP_020186273.1	chitinase 5-like	bread wheat;Aegilops tauschii subsp. tauschii	Triticum aestivum;Aegilops tauschii subsp. tauschii
	+	1.72662	-3.9177	A0A1D5UR24	A0A1D5UR24	tr|A0A1D5UR24|A0A1D5UR24_WHEAT Uncharacterized protein OS=Triticum aestivum PE=3 SV=1	2	1	1	16.5	8.7	8.7	20.79	323.31	6435700000	86	2.59138	0.00954687	-3.93177	-1.88518	25.4748	25.1729	25.6267	25.8019	24.5793	25.9075	29.9879	30.2888	28.3988	28.6419	29.4118	30.0304	A0A1D5UR24	1149841015	XP_020176405.1	probable ribose-5-phosphate isomerase 2	Aegilops tauschii subsp. tauschii	Aegilops tauschii subsp. tauschii
	+	2.59138	-3.93177	A0A1D5URJ1	A0A1D5URJ1	tr|A0A1D5URJ1|A0A1D5URJ1_WHEAT Uncharacterized protein OS=Triticum aestivum PE=4 SV=1	2	2	2	14.2	14.2	14.2	21.928	73.335	29398000000	112	1.09099	0.0204554	4.57715	1.3181	30.7506	33.0639	30.2131	32.265	30.6989	32.5352	25.9974	25.558	25.2922	25.7007	25.0543	31.0127	A0A1D5URJ1	474449551	EMS68775.1	Thaumatin-like protein	Triticum urartu	Triticum urartu
	+	1.09099	4.57715	A0A1D5V218	A0A1D5V218	tr|A0A1D5V218|A0A1D5V218_WHEAT Uncharacterized protein OS=Triticum aestivum PE=4 SV=1	17	6	3	61.2	25.1	19.4	35.535	66.722	8428600000	61	2.65336	0.00765455	-4.28614	-2.02704	24.1362	28.3156	24.3584	25.8716	24.2084	24.7313	31.0788	30.7778	29.3337	29.1163	28.6437	29.9098	A0A1D5V218	1149787809	XP_020155790.1	protein TsetseEP-like	Aegilops tauschii subsp. tauschii	Aegilops tauschii subsp. tauschii
	+	2.65336	-4.28614	A0A1D5V4E2;A0A1D5V2H3;A0A1D5UF02;A0A1D5V2H2;A0A1D5TIT4	A0A1D5V4E2	tr|A0A1D5V4E2|A0A1D5V4E2_WHEAT Uncharacterized protein OS=Triticum aestivum PE=3 SV=1	9	2	2	41.3	17.7	17.7	33.855	162.09	37898000000	597	1.56613	0.0208161	-3.27511	-1.33032	28.6819	28.3517	28.4875	27.5638	25.5339	27.2625	33.6431	31.1099	31.4986	31.349	29.9955	28.841	A0A1D5V4E2	1149752857	XP_020198692.1	glucan endo-1,3-beta-glucosidase GII-like	Aegilops tauschii subsp. tauschii	Aegilops tauschii subsp. tauschii
	+	1.56613	-3.27511	A0A1D5V896	A0A1D5V896	tr|A0A1D5V896|A0A1D5V896_WHEAT Uncharacterized protein OS=Triticum aestivum PE=3 SV=1	8	2	2	32.2	6.1	6.1	23.345	8.4043	2811200000	76	1.77642	0.0275124	-2.66272	-1.22532	25.102	28.2899	26.7388	25.4451	26.2446	24.4311	28.1915	27.3323	28.477	28.3189	27.2071	28.5829	A0A1D5V896	1149763711	XP_020147117.1	glucan endo-1,3-beta-glucosidase, acidic isoform-like	Aegilops tauschii subsp. tauschii	Aegilops tauschii subsp. tauschii
	+	1.77642	-2.66272	A0A1D5VFF4	A0A1D5VFF4	tr|A0A1D5VFF4|A0A1D5VFF4_WHEAT Uncharacterized protein OS=Triticum aestivum PE=4 SV=1	13	4	4	71.2	23.7	23.7	29.202	153.38	27040000000	142	3.30499	0.0277297	-2.07527	-1.22011	29.4086	29.4459	29.4251	28.638	29.0417	28.6048	32.2302	32.3531	30.9302	31.1108	30.6249	30.7746	A0A1D5VFF4	1149777232	XP_020180416.1	thioredoxin Y, chloroplastic-like	Aegilops tauschii subsp. tauschii	Aegilops tauschii subsp. tauschii
	+	3.30499	-2.07527	A0A1D5W1T2	A0A1D5W1T2	tr|A0A1D5W1T2|A0A1D5W1T2_WHEAT Uncharacterized protein OS=Triticum aestivum PE=3 SV=1	5	4	4	21.7	18.8	18.8	35.332	323.31	3245000000	101	1.989	0.0476947	-2.14164	-1.08791	26.245	25.6832	25.3135	24.7733	25.4059	24.148	29.7377	29.4133	28.2874	27.4472	26.4232	26.8817	A0A1D5W1T2	1149766838	XP_020148298.1	glucan endo-1,3-beta-glucosidase GIII-like	Aegilops tauschii subsp. tauschii	Aegilops tauschii subsp. tauschii
	+	3.30561	-2.44228	A0A1D5WK84;A0A1D5WK85;A0A1D5XFP5;A0A1D5XFP3;A0A1D5VV47;W5CRT9;A0A1D5XFP4;A0A1D5WK86	A0A1D5WK84;A0A1D5WK85;A0A1D5XFP5	tr|A0A1D5WK84|A0A1D5WK84_WHEAT Uncharacterized protein OS=Triticum aestivum PE=4 SV=1;tr|A0A1D5WK85|A0A1D5WK85_WHEAT Uncharacterized protein OS=Triticum aestivum PE=4 SV=1;tr|A0A1D5XFP5|A0A1D5XFP5_WHEAT Uncharacterized protein OS=Triticum aestivum PE=4 SV=	10	10	4	49.8	49.8	24.9	27.794	21.631	1434900000	38	3.30561	0.0175633	-2.44228	-1.40658	25.173	27.2801	24.9851	24.7069	24.8288	24.8807	27.78	25.1009	26.8912	27.7087	27.0011	27.0335	A0A1D5WK84	1149716516	XP_020184261.1	phosphatidylinositol transfer protein PDR16-like	Aegilops tauschii subsp. tauschii	Aegilops tauschii subsp. tauschii
	+	1.69794	2.52424	A0A1D5WMA3	A0A1D5WMA3	tr|A0A1D5WMA3|A0A1D5WMA3_WHEAT Uncharacterized protein OS=Triticum aestivum PE=4 SV=1	12	2	2	42.3	12.6	12.6	37.976	58.146	2288500000	27	1.69794	0.0337203	2.52424	1.16101	27.8575	24.6428	27.716	28.1392	27.9424	27.8727	26.6238	25.3514	27.0289	24.2901	26.6088	25.4826	A0A1D5WMA3	255675408	BAF14560.2	Os04g0391900, partial	Japanese rice	Oryza sativa Japonica Group
	+	2.62563	-2.79193	A0A1D5WN17	A0A1D5WN17	tr|A0A1D5WN17|A0A1D5WN17_WHEAT Uncharacterized protein OS=Triticum aestivum PE=3 SV=1	5	5	2	15.3	15.3	6	51.954	34.804	1233100000	24	2.62563	0.0149831	-2.79193	-1.46392	24.2882	26.4101	24.4503	25.2186	24.3188	24.2695	26.748	24.2562	26.7159	26.8709	27.5758	27.736	A0A1D5WN17	1149771716	XP_020150061.1	serine carboxypeptidase-like 2	Aegilops tauschii subsp. tauschii	Aegilops tauschii subsp. tauschii
	+	1.39095	2.78116	A0A1D5WSP9;A0A1D5WSQ1;A0A1D5VJ28	A0A1D5WSP9;A0A1D5WSQ1;A0A1D5VJ28	tr|A0A1D5WSP9|A0A1D5WSP9_WHEAT Peroxidase OS=Triticum aestivum PE=3 SV=1;tr|A0A1D5WSQ1|A0A1D5WSQ1_WHEAT Peroxidase OS=Triticum aestivum PE=3 SV=1;tr|A0A1D5VJ28|A0A1D5VJ28_WHEAT Peroxidase OS=Triticum aestivum PE=3 SV=1	9	9	3	44.6	44.6	18.6	33.409	57.339	3741200000	67	1.39095	0.0366556	2.78116	1.1433	28.7102	28.2973	27.7739	29.6186	29.02	28.5657	26.1571	26.9089	25.4693	24.9781	25.9188	27.9638	A0A1D5WSP9	1149727841	XP_020189781.1	peroxidase 49-like	Aegilops tauschii subsp. tauschii	Aegilops tauschii subsp. tauschii
	+	2.41959	-2.9544	W5D761;A0A1D5WTR6	W5D761;A0A1D5WTR6	tr|W5D761|W5D761_WHEAT Uncharacterized protein OS=Triticum aestivum GN=TRAES_3BF175100070CFD_c1 PE=4 SV=1;tr|A0A1D5WTR6|A0A1D5WTR6_WHEAT Uncharacterized protein OS=Triticum aestivum PE=4 SV=1	2	1	1	8.9	5.1	5.1	25.746	2.6339	2687800000	43	2.41959	0.0145517	-2.9544	-1.48483	24.4157	25.8262	24.9723	25.8593	24.5685	24.5236	29.0999	27.6947	27.5606	28.0887	28.2195	27.5064	W5D761	1149781300	XP_020153530.1	proactivator polypeptide-like 1	Aegilops tauschii subsp. tauschii	Aegilops tauschii subsp. tauschii
	+	2.06881	-2.92889	A0A1D5WVU0;C6YB61	A0A1D5WVU0;C6YB61	tr|A0A1D5WVU0|A0A1D5WVU0_WHEAT Uncharacterized protein OS=Triticum aestivum PE=4 SV=1;tr|C6YB61|C6YB61_WHEAT Cytokinin oxidase (Fragment) OS=Triticum aestivum GN=ckx PE=4 SV=1	11	5	2	29.8	17.2	5.2	56.112	35.097	1320000000	26	2.06881	0.0183141	-2.92889	-1.38949	25.0734	26.1976	27.6767	26.2019	25.2834	24.8419	24.6122	24.3115	25.7452	28.3858	27.5722	29.1559	A0A1D5WVU0	1149785045	XP_020154743.1	cytokinin dehydrogenase 1-like	Aegilops tauschii subsp. tauschii	Aegilops tauschii subsp. tauschii
	+	2.22818	-4.08701	Q41584;A0A1D5X1Y2	Q41584;A0A1D5X1Y2	tr|Q41584|Q41584_WHEAT Thaumatin-like protein OS=Triticum aestivum PE=2 SV=1;tr|A0A1D5X1Y2|A0A1D5X1Y2_WHEAT Uncharacterized protein OS=Triticum aestivum PE=4 SV=1	3	3	2	23.9	23.9	13.6	18.391	323.31	190570000000	529	2.22818	0.0103941	-4.08701	-1.80448	29.4869	33.2717	30.8294	28.716	31.0162	30.139	35.2968	34.4252	33.785	33.3989	34.0575	34.6758	Q41584	1321999	CAA66278.1	thaumatin-like protein	bread wheat	Triticum aestivum
	+	3.14018	-3.13419	A0A1D5X4Q6;A0A1D5Z5G0;A0A1D5Z5F9;A0A1D6S529;A0A1D5Z5G2;A0A1D5Z5G1;A0A075TDV1	A0A1D5X4Q6;A0A1D5Z5G0;A0A1D5Z5F9;A0A1D6S529;A0A1D5Z5G2;A0A1D5Z5G1	tr|A0A1D5X4Q6|A0A1D5X4Q6_WHEAT Uncharacterized protein OS=Triticum aestivum PE=4 SV=1;tr|A0A1D5Z5G0|A0A1D5Z5G0_WHEAT Uncharacterized protein OS=Triticum aestivum PE=4 SV=1;tr|A0A1D5Z5F9|A0A1D5Z5F9_WHEAT Uncharacterized protein OS=Triticum aestivum PE=4 SV=	9	9	9	15.7	15.7	15.7	81.69	62.989	2686900000	41	3.14018	0.0107211	-3.13419	-1.70831	26.3654	24.2639	28.123	24.7395	25.033	25.0017	28.1691	28.3164	28.5948	28.6752	27.9096	27.592	A0A1D5X4Q6	1149814490	XP_020166220.1	DEAD-box ATP-dependent RNA helicase 3, chloroplastic	Aegilops tauschii subsp. tauschii	Aegilops tauschii subsp. tauschii
	+	1.50706	-3.17968	A0A1D5X5E7;A0A1D5X5E6	A0A1D5X5E7;A0A1D5X5E6	tr|A0A1D5X5E7|A0A1D5X5E7_WHEAT Uncharacterized protein OS=Triticum aestivum PE=4 SV=1;tr|A0A1D5X5E6|A0A1D5X5E6_WHEAT Uncharacterized protein OS=Triticum aestivum PE=4 SV=1	6	6	3	34.7	34.7	13.8	23.461	323.31	89891000000	451	1.50706	0.0226346	-3.17968	-1.28436	28.1465	32.5294	29.8246	28.2628	30.6323	29.8501	33.707	33.3916	32.2831	31.8559	32.3292	34.0991	A0A1D5X5E7	14164983	AAK55326.1	thaumatin-like protein TLP8	Hordeum vulgare	Hordeum vulgare
	+	1.93529	2.40809	A0A1D5XB87;A0A1D5XB84;W5E0Q2;A0A1D5Y428;A0A1D5XLM6;A0A1D5XLM5;A0A1D5XB81;A0A1D5XB79;A0A1D5Y427;A0A1D5XB82;A0A1D5XLM4;A0A1D5XB83;A0A1D5XB85;A0A1D5Y426	A0A1D5XB87;A0A1D5XB84;W5E0Q2;A0A1D5Y428;A0A1D5XLM6;A0A1D5XLM5;A0A1D5XB81;A0A1D5XB79;A0A1D5Y427;A0A1D5XB82;A0A1D5XLM4;A0A1D5XB83;A0A1D5XB85;A0A1D5Y426	tr|A0A1D5XB87|A0A1D5XB87_WHEAT Uncharacterized protein OS=Triticum aestivum PE=4 SV=1;tr|A0A1D5XB84|A0A1D5XB84_WHEAT Uncharacterized protein OS=Triticum aestivum PE=4 SV=1;tr|W5E0Q2|W5E0Q2_WHEAT Uncharacterized protein OS=Triticum aestivum PE=4 SV=1;tr|A0A	4	4	4	11	11	11	57.692	94.376	1730500000	21	1.93529	0.0336052	2.40809	1.17689	28.2614	26.6708	23.7131	28.3468	26.9627	28.1138	25.405	24.8029	26.5308	24.8849	25.2739	26.0403	A0A1D5XB87	1149771434	XP_020149950.1	protein STRUBBELIG-RECEPTOR FAMILY 6-like	Aegilops tauschii subsp. tauschii	Aegilops tauschii subsp. tauschii
	+	2.967	-2.33069	A0A1D5XKC4	A0A1D5XKC4	tr|A0A1D5XKC4|A0A1D5XKC4_WHEAT Uncharacterized protein OS=Triticum aestivum PE=4 SV=1	5	2	2	33.9	17	17	23.306	10.462	2748000000	33	2.967	0.0202549	-2.33069	-1.31224	27.2972	26.2507	28.1421	25.6949	25.8447	26.1761	27.8015	28.0616	27.9261	28.6816	28.1512	27.8749	A0A1D5XKC4	357114528	XP_003559052.1	probable pterin-4-alpha-carbinolamine dehydratase, chloroplastic	stiff brome	Brachypodium distachyon
	+	3.38478	3.07105	A0A1D5XLM2;A0A1D5XWT7;A0A1D5XLM1	A0A1D5XLM2;A0A1D5XWT7;A0A1D5XLM1	tr|A0A1D5XLM2|A0A1D5XLM2_WHEAT Uncharacterized protein OS=Triticum aestivum PE=3 SV=1;tr|A0A1D5XWT7|A0A1D5XWT7_WHEAT Uncharacterized protein OS=Triticum aestivum PE=3 SV=1;tr|A0A1D5XLM1|A0A1D5XLM1_WHEAT Uncharacterized protein OS=Triticum aestivum PE=3 SV=	11	1	1	47.6	6.9	6.9	29.816	3.5253	4773600000	23	3.38478	0.0109444	3.07105	1.72188	25.5932	24.5454	24.7322	28.6587	28.6692	27.9748	25.76	28.6736	24.1032	25.6713	25.3169	25.1013	A0A1D5XLM2	1149712885	XP_020182479.1	50S ribosomal protein L5, chloroplastic	Aegilops tauschii subsp. tauschii	Aegilops tauschii subsp. tauschii
	+	2.58572	-2.15029	W5EKT6;A0A1D5Y1H4	W5EKT6;A0A1D5Y1H4	tr|W5EKT6|W5EKT6_WHEAT Uncharacterized protein OS=Triticum aestivum PE=4 SV=1;tr|A0A1D5Y1H4|A0A1D5Y1H4_WHEAT Uncharacterized protein OS=Triticum aestivum PE=4 SV=1	7	7	0	12	12	0	105.35	72.771	2428700000	71	2.58572	0.0328035	-2.15029	-1.18057	26.9278	25.7712	26.5309	25.8563	24.8577	25.3729	28.6129	28.0477	27.66	27.2332	27.6962	27.6084	W5EKT6	1149839633	XP_020175887.1	probable leucine-rich repeat receptor-like protein kinase At5g49770	Aegilops tauschii subsp. tauschii	Aegilops tauschii subsp. tauschii
	+	1.49672	2.81337	A0A1D5Y5E5	A0A1D5Y5E5	tr|A0A1D5Y5E5|A0A1D5Y5E5_WHEAT Dirigent protein OS=Triticum aestivum PE=3 SV=1	6	2	2	34.6	16.4	16.4	16.589	4.2965	2536600000	26	1.49672	0.0322533	2.81337	1.18707	28.0282	23.8196	28.2745	26.7841	26.0704	28.4108	24.3571	27.7171	26.396	25.1883	23.3641	24.2727	A0A1D5Y5E5	1149746224	XP_020196130.1	dirigent protein 21-like	Aegilops tauschii subsp. tauschii	Aegilops tauschii subsp. tauschii
	+	1.23191	3.5148	A0A1D5YB09	A0A1D5YB09	tr|A0A1D5YB09|A0A1D5YB09_WHEAT Uncharacterized protein OS=Triticum aestivum PE=4 SV=1	10	2	2	22.4	4.8	4.8	69.778	24.531	1567800000	34	1.87497	0.0468933	2.20943	1.09273	28.1789	27.6242	25.9089	27.5607	28.3432	26.8264	25.1848	24.4811	25.277	25.8785	25.326	24.8975	A0A1D5YB09	#N/A	#N/A	#N/A	#N/A	#N/A
	+	1.00737	-3.75131	A0A1D5YCZ9;A0A1D5YCZ8;A0A1D5Z1F1;A0A1D5ZPA8	A0A1D5YCZ9;A0A1D5YCZ8;A0A1D5Z1F1;A0A1D5ZPA8	tr|A0A1D5YCZ9|A0A1D5YCZ9_WHEAT Uncharacterized protein OS=Triticum aestivum PE=4 SV=1;tr|A0A1D5YCZ8|A0A1D5YCZ8_WHEAT Uncharacterized protein OS=Triticum aestivum PE=4 SV=1;tr|A0A1D5Z1F1|A0A1D5Z1F1_WHEAT Uncharacterized protein OS=Triticum aestivum PE=4 SV=	8	1	0	32.4	5.1	0	30.048	40.41	11357000000	61	1.23191	0.0266789	3.5148	1.23757	30.16	29.8313	29.9254	30.212	30.2308	30.0828	28.8319	24.7632	28.6885	29.2912	24.909	25.781	A0A1D5YCZ9	#N/A	#N/A	#N/A	#N/A	#N/A
	+	2.79098	-2.02889	A0A1D5YFE5;A0A1D5ZXM5;A0A1D5YFE6;W5FJB8	A0A1D5YFE5;A0A1D5ZXM5;A0A1D5YFE6;W5FJB8	tr|A0A1D5YFE5|A0A1D5YFE5_WHEAT Uncharacterized protein OS=Triticum aestivum PE=3 SV=1;tr|A0A1D5ZXM5|A0A1D5ZXM5_WHEAT Uncharacterized protein OS=Triticum aestivum PE=3 SV=1;tr|A0A1D5YFE6|A0A1D5YFE6_WHEAT Uncharacterized protein OS=Triticum aestivum PE=3 SV=	1	1	1	5.2	5.2	5.2	32.914	261.93	74584000000	181	1.00737	0.0351055	-3.75131	-1.15522	30.0409	31.468	31.5348	25.6025	30.0641	31.0209	31.7955	34.1617	32.447	31.9194	32.3799	33.6422	A0A1D5YFE5	1149814568	XP_020166254.1	serine carboxypeptidase-like 2	Aegilops tauschii subsp. tauschii	Aegilops tauschii subsp. tauschii
	+	1.45959	-3.18336	A0A1D5YHS1	A0A1D5YHS1	tr|A0A1D5YHS1|A0A1D5YHS1_WHEAT Uncharacterized protein OS=Triticum aestivum PE=4 SV=1	5	5	4	16	16	12	51.764	49.017	1736900000	39	2.79098	0.0358745	-2.02889	-1.14796	25.882	25.7492	26.6223	25.1821	25.5024	25.7135	28.0115	27.3479	28.5556	27.8844	27.4708	27.1295	A0A1D5YHS1	1149771188	XP_020149865.1	subtilisin-like protease SBT1.2	Aegilops tauschii subsp. tauschii	Aegilops tauschii subsp. tauschii
	+	1.23898	2.7616	A0A1D5YL81	A0A1D5YL81	tr|A0A1D5YL81|A0A1D5YL81_WHEAT Uncharacterized protein OS=Triticum aestivum PE=4 SV=1	12	12	2	28.2	28.2	4.6	79.046	45.093	2638900000	43	1.45959	0.0241412	-3.18336	-1.26703	25.4599	24.6619	24.0575	26.3921	26.0172	24.0696	24.7105	26.8591	28.0539	28.1129	27.8256	30.0906	A0A1D5YL81	#N/A	#N/A	#N/A	#N/A	#N/A
	+	3.27437	-4.1141	A0A1D5YUG0	A0A1D5YUG0	tr|A0A1D5YUG0|A0A1D5YUG0_WHEAT Uncharacterized protein OS=Triticum aestivum PE=4 SV=1	21	3	3	54.6	6.6	6.6	71.487	17.605	3428700000	29	1.23898	0.0483813	2.7616	1.08438	28.9492	23.7625	28.2052	28.8396	28.8662	28.4421	25.4376	25.0875	25.3288	24.7163	28.0159	25.1308	A0A1D5YUG0	1149714930	XP_020183504.1	thaumatin-like pathogenesis-related protein 3	Aegilops tauschii subsp. tauschii	Aegilops tauschii subsp. tauschii
	+	1.91217	2.87094	A0A1D6A412;A0A1D5YVE1;A0A1D5ZF66;W5FPH5	A0A1D6A412;A0A1D5YVE1;A0A1D5ZF66;W5FPH5	tr|A0A1D6A412|A0A1D6A412_WHEAT Uncharacterized protein OS=Triticum aestivum PE=4 SV=1;tr|A0A1D5YVE1|A0A1D5YVE1_WHEAT Uncharacterized protein OS=Triticum aestivum PE=4 SV=1;tr|A0A1D5ZF66|A0A1D5ZF66_WHEAT Uncharacterized protein OS=Triticum aestivum PE=4 SV=	3	3	3	25.1	25.1	25.1	17.868	120.78	14537000000	50	3.27437	0.00730348	-4.1141	-2.159	25.3952	28.6774	25.8659	25.8417	25.4355	25.1583	32.2407	30.9011	30.146	30.2829	29.1137	29.3812	A0A1D6A412	1149818527	XP_020167892.1	PI-PLC X domain-containing protein At5g67130-like	Aegilops tauschii subsp. tauschii	Aegilops tauschii subsp. tauschii
	+	1.35781	-3.45879	A0A1D5YXF7	A0A1D5YXF7	tr|A0A1D5YXF7|A0A1D5YXF7_WHEAT Uncharacterized protein OS=Triticum aestivum PE=4 SV=1	6	2	2	23.1	9.2	9.2	38.805	92.821	1106100000	15	1.91217	0.0207118	2.87094	1.32833	27.9804	25.0539	25.5408	27.8829	27.8806	26.8143	26.1834	25.0921	25.7094	23.8577	25.7285	24.3789	A0A1D5YXF7	1149802972	XP_020161635.1	FBD-associated F-box protein At2g26860-like	Aegilops tauschii subsp. tauschii	Aegilops tauschii subsp. tauschii
	+	2.53237	-2.50842	A0A1D5ZMV9;A0A1D6SEA8;A0A1D5ZMW0;A0A1D5YZC2;A0A1D6SEA6;W5HVG9;W5FUK3;W5FA54;A0A1D6SEA5;A0A1D6D4X0;A0A1D5YVP5;A0A1D5ZGL0;A0A1D6A3U7;A0A1D6A3U8;A0A1D5YVP4;A0A1D5ZGK9;A0A1D6BZU1;A0A1D5ZGK6;A0A1D5YVP1;A0A1D6D4W6;A0A1D6A3U5;A0A1D5YVP0;A0A1D5ZGK8;A0A1D5ZGK7;A0A1D5ZGL1;A0A1D6A3U4;W5G2Z1;W5F508;W5FMT7;A0A1D5YVP3;A0A1D6D4W7;A0A1D6BZU0;A0A1D6BZT5;A0A1D6D4W4;A0A1D6D4W8;A0A1D6CJR8;A0A1D6BZT6;A0A1D6BZU2;A0A1D…	A0A1D5ZMV9;A0A1D6SEA8;A0A1D5ZMW0;A0A1D5YZC2;A0A1D6SEA6;W5HVG9;W5FUK3;W5FA54	tr|A0A1D5ZMV9|A0A1D5ZMV9_WHEAT Uncharacterized protein OS=Triticum aestivum PE=4 SV=1;tr|A0A1D6SEA8|A0A1D6SEA8_WHEAT Uncharacterized protein OS=Triticum aestivum PE=4 SV=1;tr|A0A1D5ZMW0|A0A1D5ZMW0_WHEAT Uncharacterized protein OS=Triticum aestivum PE=4 SV=	1	1	1	2.8	2.8	2.8	75.539	6.1203	7605900000	46	1.35781	0.0224	-3.45879	-1.28561	25.8703	25.0286	25.627	24.9223	25.7946	24.0663	24.6562	24.8106	25.3362	29.2005	26.2454	29.7138	A0A1D5ZMV9	1149767301	XP_020148460.1	serine/threonine-protein kinase phg2-like	Aegilops tauschii subsp. tauschii	Aegilops tauschii subsp. tauschii
	+	2.56837	-3.20533	A0A1D5ZVH3;A0A1D5Z4H2;A0A1D5YDJ6	A0A1D5ZVH3;A0A1D5Z4H2;A0A1D5YDJ6	tr|A0A1D5ZVH3|A0A1D5ZVH3_WHEAT Prefoldin subunit 4 OS=Triticum aestivum PE=3 SV=1;tr|A0A1D5Z4H2|A0A1D5Z4H2_WHEAT Prefoldin subunit 4 OS=Triticum aestivum PE=3 SV=1;tr|A0A1D5YDJ6|A0A1D5YDJ6_WHEAT Prefoldin subunit 4 OS=Triticum aestivum PE=3 SV=1	3	3	3	3.4	3.4	3.4	107.64	7.0563	1302400000	25	2.53237	0.0207638	-2.50842	-1.32895	26.0618	26.5544	25.4475	24.6833	25.5664	24.8006	25.6837	28.0326	26.3106	27.0138	27.937	27.6248	A0A1D5ZVH3	1149760435	XP_020201525.1	probable prefoldin subunit 4	Aegilops tauschii subsp. tauschii	Aegilops tauschii subsp. tauschii
	+	1.92246	-2.68465	A0A1D5Z6B8	A0A1D5Z6B8	tr|A0A1D5Z6B8|A0A1D5Z6B8_WHEAT Uncharacterized protein OS=Triticum aestivum PE=4 SV=1	6	6	6	60.3	60.3	60.3	14.423	53.715	2272000000	42	2.56837	0.0127238	-3.20533	-1.61538	25.0078	24.6165	27.0171	25.7457	25.2936	24.2574	27.5545	28.2795	27.8424	28.1806	28.0345	28.6976	A0A1D5Z6B8	1149794072	XP_020158227.1	probable carboxylesterase 7	Aegilops tauschii subsp. tauschii	Aegilops tauschii subsp. tauschii
	+	3.77508	-3.63375	A0A1D5Z6U4	A0A1D5Z6U4	tr|A0A1D5Z6U4|A0A1D5Z6U4_WHEAT Uncharacterized protein OS=Triticum aestivum PE=3 SV=1	11	11	5	47.2	47.2	15.5	35.812	122.79	3652900000	90	1.92246	0.0242553	-2.68465	-1.26986	26.4118	27.5911	26.6369	26.8261	25.5813	26.7405	27.1806	24.3113	28.3091	29.1742	28.2142	29.8135	A0A1D5Z6U4	334903128	AEH25624.1	pathogenesis-related protein 1-9	bread wheat	Triticum aestivum
	+	2.89267	-2.14855	A0A1D5Z6Y3	A0A1D5Z6Y3	tr|A0A1D5Z6Y3|A0A1D5Z6Y3_WHEAT Uncharacterized protein OS=Triticum aestivum PE=4 SV=1	2	2	2	27.8	27.8	27.8	19.738	150.93	6844700000	98	3.77508	0.00783256	-3.63375	-2.05689	25.8638	27.1799	24.6441	26.4716	25.7934	25.736	30.2063	29.5809	29.0605	29.4399	29.5986	29.8638	A0A1D5Z6Y3	474350477	EMS62968.1	hypothetical protein TRIUR3_17864	Triticum urartu	Triticum urartu
	+	1.09751	-3.92891	A0A1D5ZMJ1;A0A1D5ZMJ2;A0A1D5YDB6;A0A1D5YDB8;A0A1D5YDB7	A0A1D5ZMJ1;A0A1D5ZMJ2;A0A1D5YDB6;A0A1D5YDB8;A0A1D5YDB7	tr|A0A1D5ZMJ1|A0A1D5ZMJ1_WHEAT Uncharacterized protein OS=Triticum aestivum PE=3 SV=1;tr|A0A1D5ZMJ2|A0A1D5ZMJ2_WHEAT Uncharacterized protein OS=Triticum aestivum PE=3 SV=1;tr|A0A1D5YDB6|A0A1D5YDB6_WHEAT Uncharacterized protein OS=Triticum aestivum PE=3 SV=	2	1	1	42.3	31	31	7.3129	31.925	2080700000	36	2.89267	0.0284126	-2.14855	-1.21647	26.8958	27.1227	28.3564	25.6008	25.5004	26.0759	26.7622	27.49	27.4904	27.821	27.5603	28.2414	A0A1D5ZMJ1	#N/A	#N/A	#N/A	#N/A	#N/A
	+	2.13642	-2.68186	A0A1D5ZSW8;W5BLX8;A0A1D5V1D8	A0A1D5ZSW8	tr|A0A1D5ZSW8|A0A1D5ZSW8_WHEAT Uncharacterized protein OS=Triticum aestivum PE=4 SV=1	20	2	2	54.1	7.7	7.7	51.552	48.318	10800000000	81	1.09751	0.0272984	-3.92891	-1.23425	29.2686	29.8385	29.951	24.2026	24.4328	29.3146	29.999	30.0656	29.408	29.6238	29.7383	30.3746	A0A1D5ZSW8	1149744013	XP_020195353.1	chaperonin-like RbcX protein 2, chloroplastic	Triticum urartu;Aegilops tauschii subsp. tauschii	Triticum urartu;Aegilops tauschii subsp. tauschii
	+	3.82636	-2.32321	A0A1D5ZUK8	A0A1D5ZUK8	tr|A0A1D5ZUK8|A0A1D5ZUK8_WHEAT Uncharacterized protein OS=Triticum aestivum PE=4 SV=1	3	3	1	19.3	19.3	4.8	23.191	20.08	2244900000	34	2.13642	0.0205062	-2.68186	-1.31944	24.2575	25.469	25.3705	26.366	24.7508	25.208	27.1147	28.5091	27.7925	27.8678	27.9215	28.581	A0A1D5ZUK8	1149779945	XP_020153041.1	glutathione S-transferase-like	Aegilops tauschii subsp. tauschii	Aegilops tauschii subsp. tauschii
	+	1.31878	-3.73619	A0A1D5ZZT6	A0A1D5ZZT6	tr|A0A1D5ZZT6|A0A1D5ZZT6_WHEAT Uncharacterized protein OS=Triticum aestivum PE=3 SV=1	4	4	1	25.6	25.6	5.6	23.904	18.075	1898300000	25	3.82636	0.0182011	-2.32321	-1.39497	27.5134	26.8332	24.2659	25.0461	25.3101	25.5694	27.2623	27.6632	27.1669	27.5311	27.6044	27.7596	A0A1D5ZZT6	334903126	AEH25623.1	pathogenesis-related protein 1-8	bread wheat	Triticum aestivum
	+	1.40805	3.49274	A0A1D6A8E6;W5G933	A0A1D6A8E6;W5G933	tr|A0A1D6A8E6|A0A1D6A8E6_WHEAT Uncharacterized protein OS=Triticum aestivum PE=4 SV=1;tr|W5G933|W5G933_WHEAT Uncharacterized protein OS=Triticum aestivum PE=4 SV=1	4	4	2	30.9	30.9	16.3	17.574	323.31	18271000000	588	1.31878	0.0205572	-3.73619	-1.32183	26.6131	28.8104	26.3175	25.7903	25.805	24.2761	26.8433	29.822	25.2211	26.6034	29.9171	30.5595	A0A1D6A8E6	473895519	EMS48945.1	High mobility group B protein 4	Triticum urartu	Triticum urartu
	+	1.78365	3.39524	A0A1D6ANT9	A0A1D6ANT9	tr|A0A1D6ANT9|A0A1D6ANT9_WHEAT Uncharacterized protein OS=Triticum aestivum PE=3 SV=1	3	1	1	35.2	12	12	12.352	36.843	5008600000	36	1.40805	0.0204049	3.49274	1.31518	28.8966	27.5618	25.4943	29.7253	29.0111	29.6706	25.2096	26.3873	23.8398	28.2014	24.4954	25.232	A0A1D6ANT9	1149826991	XP_020170947.1	germin-like protein 1-1	Aegilops tauschii subsp. tauschii	Aegilops tauschii subsp. tauschii
	+	3.66618	-2.34641	A0A1D6DFA5;W5GH26;A0A1D6AVF7;A0A1D5WLA8;A0A1D5W3F9;A0A1D5V8H3	A0A1D6DFA5;W5GH26;A0A1D6AVF7	tr|A0A1D6DFA5|A0A1D6DFA5_WHEAT Peptidylprolyl isomerase OS=Triticum aestivum PE=4 SV=1;tr|W5GH26|W5GH26_WHEAT Peptidylprolyl isomerase OS=Triticum aestivum PE=4 SV=1;tr|A0A1D6AVF7|A0A1D6AVF7_WHEAT Peptidylprolyl isomerase OS=Triticum aestivum PE=4 SV=1	6	3	2	46.3	29.2	11.1	22.657	13.291	3810800000	49	1.78365	0.0171634	3.39524	1.44236	25.1651	28.7022	25.6627	29.9764	30.335	29.2504	25.0541	27.2776	24.5016	24.8872	27.418	27.0708	A0A1D6DFA5	1149745599	XP_020195887.1	peptidyl-prolyl cis-trans isomerase FKBP18, chloroplastic	Aegilops tauschii subsp. tauschii	Aegilops tauschii subsp. tauschii
	+	1.79365	-4.002	A0A1D6AYX4;A0A1D6AYX3;A0A1D6AYX5;A0A1D6AYX6;A0A1D6AYX7;A0A1D6AYX1;A0A1D6AYX2	A0A1D6AYX4;A0A1D6AYX3;A0A1D6AYX5;A0A1D6AYX6;A0A1D6AYX7;A0A1D6AYX1;A0A1D6AYX2	tr|A0A1D6AYX4|A0A1D6AYX4_WHEAT Uncharacterized protein OS=Triticum aestivum PE=4 SV=1;tr|A0A1D6AYX3|A0A1D6AYX3_WHEAT Uncharacterized protein OS=Triticum aestivum PE=4 SV=1;tr|A0A1D6AYX5|A0A1D6AYX5_WHEAT Uncharacterized protein OS=Triticum aestivum PE=4 SV=	7	7	7	30.5	30.5	30.5	24.291	15.514	2490900000	60	3.66618	0.0181053	-2.34641	-1.39374	27.6034	27.751	27.5658	25.3563	25.0523	25.67	28.3517	27.973	27.9313	27.6532	27.6725	27.7921	A0A1D6AYX4	1149831020	XP_020172503.1	microtubule-associated protein futsch isoform X1	Aegilops tauschii subsp. tauschii	Aegilops tauschii subsp. tauschii
	+	3.0712	4.47268	A0A1D6B1Q5	A0A1D6B1Q5	tr|A0A1D6B1Q5|A0A1D6B1Q5_WHEAT Beta-galactosidase OS=Triticum aestivum PE=3 SV=1	26	26	20	9.5	9.5	7.5	451.09	207.83	8719900000	121	1.79365	0.0126038	-4.002	-1.60105	28.7758	29.3388	28.7872	25.7138	24.2654	27.6012	29.5622	29.6636	30.1632	29.5582	30.3751	29.6531	A0A1D6B1Q5	1149727505	XP_020189615.1	beta-galactosidase 4	Aegilops tauschii subsp. tauschii	Aegilops tauschii subsp. tauschii
	+	3.23434	-5.83159	W5GUI9;A0A1D6B9G2;A0A1D6B9G5;A0A1D6AK41;A0A1D6AK42;A0A1D6AK39;A0A1D6AK40;A0A1D5Y4U8	W5GUI9;A0A1D6B9G2;A0A1D6B9G5;A0A1D6AK41;A0A1D6AK42;A0A1D6AK39;A0A1D6AK40	tr|W5GUI9|W5GUI9_WHEAT Phenylalanine ammonia-lyase OS=Triticum aestivum PE=3 SV=1;tr|A0A1D6B9G2|A0A1D6B9G2_WHEAT Phenylalanine ammonia-lyase OS=Triticum aestivum PE=3 SV=1;tr|A0A1D6B9G5|A0A1D6B9G5_WHEAT Phenylalanine ammonia-lyase OS=Triticum aestivum PE=3	6	1	1	9.1	3.3	3.3	80.249	24.097	4908000000	32	3.0712	0.00594652	4.47268	2.23889	26.0452	26.3285	29.3284	29.3602	29.7034	28.6286	23.5738	24.3803	25.3791	24.8765	25.3556	24.0421	W5GUI9	1149705470	XP_020178866.1	phenylalanine ammonia-lyase	domesticated barley;Aegilops tauschii subsp. tauschii	Hordeum vulgare subsp. vulgare;Aegilops tauschii subsp. tauschii
	+	0.860249	4.12635	A0A1D6BC87	A0A1D6BC87	tr|A0A1D6BC87|A0A1D6BC87_WHEAT Uncharacterized protein OS=Triticum aestivum PE=3 SV=1	25	25	16	40.9	40.9	25.9	75.618	214.26	11854000000	166	3.23434	0.00286316	-5.83159	-2.79196	26.4236	25.7746	25.6532	24.6718	24.9977	26.1878	29.8344	25.8923	29.3968	31.8118	30.5669	30.9734	A0A1D6BC87	#N/A	#N/A	#N/A	#N/A	#N/A
	+	3.67703	-3.13219	A0A1D6BJ70	A0A1D6BJ70	tr|A0A1D6BJ70|A0A1D6BJ70_WHEAT Uncharacterized protein OS=Triticum aestivum PE=3 SV=1	9	3	3	26.1	5	5	50.789	11.754	5739000000	46	2.82992	0.0423919	1.95245	1.11486	29.3433	29.053	28.5842	29.6188	29.1401	29.8598	29.0768	28.5358	27.9733	27.6812	27.7605	27.3196	A0A1D6BJ70	1149818103	XP_020167713.1	aspartyl protease family protein At5g10770-like	Aegilops tauschii subsp. tauschii	Aegilops tauschii subsp. tauschii
	+	2.54076	-2.24877	A0A1D6BM14;A0A1D6C4Q0	A0A1D6BM14;A0A1D6C4Q0	tr|A0A1D6BM14|A0A1D6BM14_WHEAT Uncharacterized protein OS=Triticum aestivum PE=4 SV=1;tr|A0A1D6C4Q0|A0A1D6C4Q0_WHEAT Uncharacterized protein OS=Triticum aestivum PE=4 SV=1	9	2	2	49.1	17.5	17.5	24.106	98.492	14199000000	36	0.860249	0.0442173	4.12635	1.10619	31.096	25.8299	24.8773	30.8294	31.1174	30.487	28.4763	31.7425	24.5828	24.1528	31.1154	24.7865	A0A1D6BM14	508776453	EOY23709.1	RING-H2 zinc finger protein RHA2a, putative	cacao	Theobroma cacao
	+	2.17302	2.22873	A0A1D6BPT6;W5GF29;A0A1D6BF22	A0A1D6BPT6	tr|A0A1D6BPT6|A0A1D6BPT6_WHEAT Peroxidase OS=Triticum aestivum PE=3 SV=1	9	9	2	27.2	27.2	2	47.34	323.31	25977000000	485	3.67703	0.0107059	-3.13219	-1.79657	27.4355	28.9801	26.7887	26.6384	26.9878	27.0457	33.3698	31.6241	30.7747	30.3961	29.679	29.9933	A0A1D6BPT6	1149786266	XP_020155203.1	peroxidase 45-like	Aegilops tauschii subsp. tauschii	Aegilops tauschii subsp. tauschii
	+	1.4409	4.22255	A0A1D6C2Z1;W5I047;A0A1D6C2Y8;A0A1D6C2Y9;A0A1D6CVI8	A0A1D6C2Z1;W5I047;A0A1D6C2Y8;A0A1D6C2Y9	tr|A0A1D6C2Z1|A0A1D6C2Z1_WHEAT Uncharacterized protein OS=Triticum aestivum PE=3 SV=1;tr|W5I047|W5I047_WHEAT Uncharacterized protein OS=Triticum aestivum PE=3 SV=1;tr|A0A1D6C2Y8|A0A1D6C2Y8_WHEAT Uncharacterized protein OS=Triticum aestivum PE=3 SV=1;tr|A0A	6	1	1	24.4	4.9	4.9	36.775	14.338	2127800000	27	1.98318	0.0468008	2.15425	1.09177	24.8753	25.6509	26.9819	28.1298	27.4436	26.7201	23.779	28.5064	25.2045	25.5896	25.4389	24.8021	A0A1D6C2Z1	1149775137	XP_020151320.1	ervatamin-B-like	Aegilops tauschii subsp. tauschii	Aegilops tauschii subsp. tauschii
	+	6.05833	2.16345	A0A1D6C4U4;A0A1D6BLA2	A0A1D6C4U4;A0A1D6BLA2	tr|A0A1D6C4U4|A0A1D6C4U4_WHEAT Peroxidase OS=Triticum aestivum PE=3 SV=1;tr|A0A1D6BLA2|A0A1D6BLA2_WHEAT Peroxidase OS=Triticum aestivum PE=3 SV=1	5	5	5	37.2	37.2	37.2	24.112	9.9243	1129000000	31	2.54076	0.0281618	-2.24877	-1.21844	24.4103	26.0006	26.442	25.379	25.0845	24.3895	26.7496	25.1039	27.4184	27.2172	26.8749	27.5072	A0A1D6C4U4	1149763221	XP_020146969.1	peroxidase P7-like isoform X1	Aegilops tauschii subsp. tauschii	Aegilops tauschii subsp. tauschii
	+	2.74942	-6.22517	A0A1D6C9I2	A0A1D6C9I2	tr|A0A1D6C9I2|A0A1D6C9I2_WHEAT Uncharacterized protein OS=Triticum aestivum PE=4 SV=1	8	8	2	34.1	34.1	10.1	33.935	323.31	39313000000	213	2.17302	0.0350316	2.22873	1.15346	31.5451	30.8448	31.2709	32.7936	32.5513	31.9574	28.2342	30.751	29.4779	29.5744	30.7978	30.2439	A0A1D6C9I2	1149723491	XP_020187657.1	chitinase 8-like	Aegilops tauschii subsp. tauschii	Aegilops tauschii subsp. tauschii
	+	1.32838	2.87343	A0A1D6D0S1;A0A1D6CE17;A0A1D6BUF8;A0A1D6BUF9	A0A1D6D0S1;A0A1D6CE17;A0A1D6BUF8;A0A1D6BUF9	tr|A0A1D6D0S1|A0A1D6D0S1_WHEAT Uncharacterized protein OS=Triticum aestivum PE=4 SV=1;tr|A0A1D6CE17|A0A1D6CE17_WHEAT Uncharacterized protein OS=Triticum aestivum PE=4 SV=1;tr|A0A1D6BUF8|A0A1D6BUF8_WHEAT Uncharacterized protein OS=Triticum aestivum PE=4 SV=	9	1	1	37.9	8.3	8.3	28.699	115.74	42775000000	147	1.4409	0.0147578	4.22255	1.47525	31.9	30.8105	31.7214	32.5046	31.5153	32.084	31.1174	29.707	31.1766	25.1977	28.6781	29.5604	A0A1D6D0S1	1149699201	XP_020151869.1	subtilisin-like protease SBT1.8	Aegilops tauschii subsp. tauschii	Aegilops tauschii subsp. tauschii
	+	1.33252	-2.69674	A0A1D6D5H8;A0A1D6CIT2;A0A1D6D5H9;A0A1D6CIT3;W5HG94	A0A1D6D5H8;A0A1D6CIT2;A0A1D6D5H9;A0A1D6CIT3;W5HG94	tr|A0A1D6D5H8|A0A1D6D5H8_WHEAT Uncharacterized protein OS=Triticum aestivum PE=4 SV=1;tr|A0A1D6CIT2|A0A1D6CIT2_WHEAT Uncharacterized protein OS=Triticum aestivum PE=4 SV=1;tr|A0A1D6D5H9|A0A1D6D5H9_WHEAT Uncharacterized protein OS=Triticum aestivum PE=4 SV=	11	9	2	46.1	37.1	9.7	33.913	146.03	10182000000	135	6.05833	0.0183957	2.16345	1.40275	29.8988	29.7254	30.0134	30.386	30.3869	30.4246	26.281	29.5251	26.1028	28.3059	28.1662	28.235	A0A1D6D5H8	1149770654	XP_020149653.1	ankyrin repeat domain-containing protein 2A-like	Aegilops tauschii subsp. tauschii	Aegilops tauschii subsp. tauschii
	+	3.65418	2.83822	A0A1D6CVE9;A0A1D6CVE8	A0A1D6CVE9;A0A1D6CVE8	tr|A0A1D6CVE9|A0A1D6CVE9_WHEAT Uncharacterized protein OS=Triticum aestivum PE=3 SV=1;tr|A0A1D6CVE8|A0A1D6CVE8_WHEAT Uncharacterized protein OS=Triticum aestivum PE=3 SV=1	7	7	7	38.6	38.6	38.6	26.151	211.44	47250000000	186	2.74942	0.00363303	-6.22517	-2.65865	25.8869	26.7077	24.9497	24.3891	25.0792	24.0729	34.1513	32.4519	32.0873	32.117	30.7093	29.3903	A0A1D6CVE9	1149818107	XP_020167715.1	aspartyl protease family protein At5g10770-like isoform X2	Aegilops tauschii subsp. tauschii	Aegilops tauschii subsp. tauschii
	+	1.46782	-2.71972	A0A1D6CZQ9;W5DS49	A0A1D6CZQ9;W5DS49	tr|A0A1D6CZQ9|A0A1D6CZQ9_WHEAT Uncharacterized protein OS=Triticum aestivum PE=4 SV=1;tr|W5DS49|W5DS49_WHEAT Uncharacterized protein OS=Triticum aestivum PE=4 SV=1	7	7	7	18.1	18.1	18.1	79.342	56.248	1263900000	36	1.32838	0.0364906	2.87343	1.14371	26.6596	27.0537	26.7826	27.3332	27.5093	26.8677	23.8276	26.3946	25.4268	26.147	22.7108	24.2322	A0A1D6CZQ9	1149711305	XP_020181720.1	binding partner of ACD11 1-like	Aegilops tauschii subsp. tauschii	Aegilops tauschii subsp. tauschii
	+	2.14476	-3.5345	A0A1D6D981;A0A1D5X968	A0A1D6D981	tr|A0A1D6D981|A0A1D6D981_WHEAT Glycosyltransferase OS=Triticum aestivum PE=3 SV=1	7	7	6	26.3	26.3	22.7	36.645	126.52	6774900000	56	1.33252	0.045232	-2.69674	-1.10207	28.1685	24.5959	25.877	27.3944	26.961	24.4995	29.6566	29.6732	29.5202	29.3325	29.2067	28.406	A0A1D6D981	1149724769	XP_020188276.1	UDP-glucose flavonoid 3-O-glucosyltransferase 7-like	Aegilops tauschii subsp. tauschii	Aegilops tauschii subsp. tauschii
	+	1.55873	2.4362	A0A1D6D9K0	A0A1D6D9K0	tr|A0A1D6D9K0|A0A1D6D9K0_WHEAT Peroxidase OS=Triticum aestivum PE=3 SV=1	5	4	3	14.8	11.5	9.2	47.53	18.873	2356100000	38	3.65418	0.0121046	2.83822	1.64672	27.5315	27.5559	26.7831	27.8667	27.8622	28.1009	26.4266	26.3845	28.7767	25.4964	24.7812	25.0375	A0A1D6D9K0	1149711176	XP_020181651.1	peroxidase 47-like	Aegilops tauschii subsp. tauschii	Aegilops tauschii subsp. tauschii
	+	2.3638	-5.92175	A0A1D6DM41	A0A1D6DM41	tr|A0A1D6DM41|A0A1D6DM41_WHEAT Uncharacterized protein OS=Triticum aestivum PE=3 SV=1	7	7	1	30.5	30.5	6	27.984	37.487	2472500000	44	1.46782	0.034958	-2.71972	-1.15262	26.6964	25.3651	27.526	23.1364	25.539	25.6975	28.7978	28.1676	28.0289	27.3267	27.9659	27.2396	A0A1D6DM41	1149820907	XP_020168891.1	zingipain-2-like	Aegilops tauschii subsp. tauschii	Aegilops tauschii subsp. tauschii
	+	1.60828	-2.70514	A0A1D6RLH8	A0A1D6RLH8	tr|A0A1D6RLH8|A0A1D6RLH8_WHEAT Uncharacterized protein OS=Triticum aestivum PE=4 SV=1	16	16	5	43.7	43.7	16.8	52.362	315.31	38184000000	352	2.14476	0.0126435	-3.5345	-1.60798	28.462	27.8698	27.6021	26.6352	28.5424	27.0895	33.5185	32.1266	31.9512	31.7444	30.63	30.4962	A0A1D6RLH8	1256608529	XP_022683703.1	non-functional NADPH-dependent codeinone reductase 2 isoform X2	foxtail millet	Setaria italica
	+	3.23126	-5.98476	A0A1D6RRT2;D2SLL8;C6YBD5	A0A1D6RRT2;D2SLL8;C6YBD5	tr|A0A1D6RRT2|A0A1D6RRT2_WHEAT Uncharacterized protein OS=Triticum aestivum PE=4 SV=1;tr|D2SLL8|D2SLL8_WHEAT Cytokinin oxidase/dehydrogenase 1 OS=Triticum aestivum GN=ckx1 PE=4 SV=1;tr|C6YBD5|C6YBD5_WHEAT Cytokinin oxidase (Fragment) OS=Triticum aestivum G	10	8	8	48.9	40.6	40.6	28.171	163.46	3077600000	54	1.55873	0.0459801	2.4362	1.09767	28.4509	25.8607	28.5125	28.8915	29.6083	28.4624	26.4939	28.8034	24.2649	25.6085	27.7648	26.2802	A0A1D6RRT2	1149785045	XP_020154743.1	cytokinin dehydrogenase 1-like	Aegilops tauschii subsp. tauschii	Aegilops tauschii subsp. tauschii
	+	2.12206	-2.28501	A0A1D6SAU6;W5GZ16	A0A1D6SAU6;W5GZ16	tr|A0A1D6SAU6|A0A1D6SAU6_WHEAT Uncharacterized protein OS=Triticum aestivum PE=4 SV=1;tr|W5GZ16|W5GZ16_WHEAT Uncharacterized protein OS=Triticum aestivum PE=4 SV=1	3	3	3	17.5	17.5	17.5	24.466	171.42	52180000000	92	2.3638	0.00546584	-5.92175	-2.35301	24.622	25.0306	25.7114	23.6565	24.9884	24.9006	34.6193	32.342	32.3292	31.782	30.8547	28.674	A0A1D6SAU6	1149719840	XP_020185861.1	alpha-aminoadipic semialdehyde synthase isoform X1	Aegilops tauschii subsp. tauschii	Aegilops tauschii subsp. tauschii
	+	1.45789	4.25289	A0A1D6SAV2;A0A1D6S808	A0A1D6SAV2	tr|A0A1D6SAV2|A0A1D6SAV2_WHEAT Pectinesterase OS=Triticum aestivum PE=4 SV=1	13	13	6	47.4	47.4	15.3	36.068	148.87	4054900000	74	1.60828	0.0312632	-2.70514	-1.19147	27.7013	27.6544	26.748	25.5224	24.2986	26.8585	29.8221	28.2485	28.2373	28.6945	28.1053	27.9952	A0A1D6SAV2	1149719854	XP_020185869.1	pectinesterase-like	Aegilops tauschii subsp. tauschii	Aegilops tauschii subsp. tauschii
	+	1.52874	2.81321	A0A1D6SEY5	A0A1D6SEY5	tr|A0A1D6SEY5|A0A1D6SEY5_WHEAT Peroxidase OS=Triticum aestivum PE=3 SV=1	12	12	2	32.4	32.4	8.8	56.15	121.61	5877300000	57	3.23126	0.00218182	-5.98476	-2.84274	23.6188	24.9913	25.3996	23.7843	25.1984	24.4965	25.2622	24.6676	26.4869	30.0576	30.0048	31.3711	A0A1D6SEY5	1149763214	XP_020146966.1	peroxidase P7-like	Aegilops tauschii subsp. tauschii	Aegilops tauschii subsp. tauschii
	+	3.41385	2.30129	A0A1D6SFL2;A0A1D6SFL1;A0A1D6BZX8	A0A1D6SFL2;A0A1D6SFL1;A0A1D6BZX8	tr|A0A1D6SFL2|A0A1D6SFL2_WHEAT Uncharacterized protein OS=Triticum aestivum PE=4 SV=1;tr|A0A1D6SFL1|A0A1D6SFL1_WHEAT Xyloglucan endotransglucosylase/hydrolase OS=Triticum aestivum PE=3 SV=1;tr|A0A1D6BZX8|A0A1D6BZX8_WHEAT Xyloglucan endotransglucosylase/hyd	23	23	1	27.2	27.2	2	115.47	52.349	1859400000	67	2.12206	0.0336375	-2.28501	-1.167	24.8733	25.1857	25.7371	25.8696	25.1958	25.4118	27.6477	26.4244	28.1577	28.5967	27.2807	27.4547	A0A1D6SFL2	1149840350	XP_020176174.1	xyloglucan endotransglycosylase/hydrolase protein 8-like	Aegilops tauschii subsp. tauschii	Aegilops tauschii subsp. tauschii
	+	1.08023	-3.81538	A9LIN4;A0A1D5VTG3;A0A077S3A3;A0A1D5V8B0;A0A1D5WCE5	A9LIN4	tr|A9LIN4|A9LIN4_WHEAT Malic enzyme OS=Triticum aestivum PE=2 SV=1	7	7	3	12.5	12.5	5.9	59.31	18.043	9595500000	63	1.45789	0.0146358	4.25289	1.48997	30.0986	30.4941	29.6912	30.655	30.2365	30.1845	25.3557	29.041	27.3241	24.725	28.7977	24.7945	A9LIN4	#N/A	#N/A	#N/A	#N/A	#N/A
	+	0.953851	-3.45708	B2B9U2;A0A1D5U0I8	B2B9U2;A0A1D5U0I8	tr|B2B9U2|B2B9U2_WHEAT V-type proton ATPase subunit G OS=Triticum aestivum PE=2 SV=1;tr|A0A1D5U0I8|A0A1D5U0I8_WHEAT Uncharacterized protein OS=Triticum aestivum PE=4 SV=1	8	3	3	34.4	13.8	13.8	33.934	116.46	2019500000	42	1.52874	0.0304018	2.81321	1.19742	26.9576	23.7745	24.7344	29.1	28.0735	27.6536	25.7325	27.9776	25.1283	24.2721	26.7979	25.3175	B2B9U2	#N/A	#N/A	#N/A	#N/A	#N/A
	+	3.89402	-4.43171	Q94F73;C3UZE2;C3UZE3;A0A0A7ACH1;A0A1D6D3U2;Q84ML7;Q2V6H5	Q94F73;C3UZE2;C3UZE3;A0A0A7ACH1;A0A1D6D3U2;Q84ML7	tr|Q94F73|Q94F73_WHEAT Pathogenesis-related protein 1 OS=Triticum aestivum GN=Pr-1-4 PE=2 SV=1;tr|C3UZE2|C3UZE2_WHEAT Pathogenesis-related protein 1 OS=Triticum aestivum PE=2 SV=1;tr|C3UZE3|C3UZE3_WHEAT Pathogenesis-related protein 1 OS=Triticum aestivum P	3	3	1	18	18	9.3	21.862	4.4394	387020000	15	3.41385	0.0202443	2.30129	1.34669	24.1204	24.6955	26.1615	26.551	26.1617	26.7585	24.662	24.0809	26.245	24.0072	24.3995	24.1606	Q94F73	1149816966	XP_020167256.1	pathogenesis-related protein PRB1-3	bread wheat;Aegilops tauschii subsp. tauschii	Triticum aestivum;Aegilops tauschii subsp. tauschii
	+	3.42385	-4.91315	C3UZE5;C3UZE4	C3UZE5;C3UZE4	tr|C3UZE5|C3UZE5_WHEAT Pathogenesis-related protein 1-1 OS=Triticum aestivum GN=Pr-1-1 PE=2 SV=1;tr|C3UZE4|C3UZE4_WHEAT Pathogenisis-related protein 1.1 OS=Triticum aestivum PE=2 SV=1	27	4	4	54.2	9.3	9.3	63.088	6.4499	11242000000	32	1.08023	0.0295556	-3.81538	-1.20725	29.7014	26.4087	25.0938	24.1025	25.3517	29.5339	24.4113	31.2146	25.1318	30.0877	30.5934	29.7532	C3UZE5	228480395	ACQ41880.1	pathogenisis-related protein 1.1	bread wheat	Triticum aestivum
	+	3.66909	-4.49268	C6ETB1	C6ETB1	tr|C6ETB1|C6ETB1_WHEAT Peroxidase OS=Triticum aestivum GN=Prx113-A PE=3 SV=1	11	11	3	62.2	62.2	23.2	17.537	323.31	624400000000	1508	3.89402	0.00432877	-4.43171	-2.45754	31.6889	32.8623	32.2461	30.5538	30.8587	31.3758	37.1067	36.692	35.7706	35.6437	35.4282	35.0115	C6ETB1	193074369	ACF08090.1	class III peroxidase	bread wheat	Triticum aestivum
	+	2.51533	-2.59173	C6ETB3	C6ETB3	tr|C6ETB3|C6ETB3_WHEAT Peroxidase OS=Triticum aestivum GN=Prx113-F PE=3 SV=1	10	7	5	68.9	63.4	47	17.635	323.31	220240000000	469	3.42385	0.00486154	-4.91315	-2.5283	29.3639	29.0887	29.5009	27.8854	28.4032	28.8106	35.4079	35.3609	33.8115	33.6771	33.5866	32.575	C6ETB3	193074373	ACF08092.1	class III peroxidase	bread wheat	Triticum aestivum
	+	1.08786	2.93451	CON__P48668	CON__P48668		12	2	1	54.2	13.5	3.8	32.667	25.003	7725000000	53	3.66909	0.00418543	-4.49268	-2.42743	25.0317	24.5146	26.0417	23.9811	24.01	24.9613	30.2283	31.0828	29.8134	28.6464	29.0869	28.6972
	+	4.24243	-4.98555	tr|A0A0C4EM26|A0A0C4EM26_PUCT1;D4P8R8;tr|A0A180H0K4|A0A180H0K4_PUCT1;W5FDK1	tr|A0A0C4EM26|A0A0C4EM26_PUCT1;D4P8R8;tr|A0A180H0K4|A0A180H0K4_PUCT1	tr|A0A0C4EM26|A0A0C4EM26_PUCT1 Uncharacterized protein OS=Puccinia triticina (isolate 1-1 / race 1 (BBBD)) PE=4 SV=1;tr|D4P8R8|D4P8R8_WHEAT Calmodulin OS=Triticum aestivum GN=CaM5 PE=2 SV=1;tr|A0A180H0K4|A0A180H0K4_PUCT1 Uncharacterized protein OS=Puccinia	9	3	0	35.4	14.2	0	32.905	225	19308000000	173	2.51533	0.0189668	-2.59173	-1.36073	29.1569	28.7925	27.5294	28.9242	27.632	28.5217	32.0739	31.4371	29.5302	30.7453	30.9044	31.2033	A0A0C4EM26	331233853	XP_003329587.1	calmodulin	bread wheat;Puccinia coronata var. avenae f. sp. avenae;Puccinia graminis f. sp. tritici CRL 75-36-700-3;Puccinia striiformis f. sp. tritici PST-78	Triticum aestivum;Puccinia coronata var. avenae f. sp. avenae;Puccinia graminis f. sp. tritici CRL 75-36-700-3;Puccinia striiformis f. sp. tritici PST-78
	+	1.02129	-5.06112	F8S6T5;A0A0A7ACK5	F8S6T5;A0A0A7ACK5	tr|F8S6T5|F8S6T5_WHEAT Pathogenesis-related protein 1-5 OS=Triticum aestivum GN=Pr-1-5 PE=2 SV=1;tr|A0A0A7ACK5|A0A0A7ACK5_WHEAT Pathogenesis-related protein 1-5 OS=Triticum aestivum GN=Pr-1-5 PE=3 SV=1	12	9	9	70.5	59.7	59.7	16.736	323.31	5027700000	51	4.24243	0.00295652	-4.98555	-2.80325	24.8465	26.0421	25.627	24.9598	25.3645	25.5784	24.9635	25.7166	25.1665	29.9894	30.6954	30.1746	F8S6T5	334903120	AEH25620.1	pathogenesis-related protein 1-5	bread wheat	Triticum aestivum
	+	2.02829	-4.09527	F8S6U9	F8S6U9	tr|F8S6U9|F8S6U9_WHEAT Pathogenesis-related protein 1-19 OS=Triticum aestivum GN=Pr-1-19 PE=3 SV=1	9	2	2	53.7	15.2	15.2	17.55	54.578	79006000000	127	1.02129	0.02066	-5.06112	-1.3227	25.5704	25.0563	27.3242	25.0707	25.1616	24.8445	34.5859	34.0986	32.0723	32.0862	32.7216	25.4523	F8S6U9	334903148	AEH25634.1	pathogenesis-related protein 1-19	bread wheat	Triticum aestivum
	+	1.35786	-3.11771	H2KXF7;A0A1D5XHD3;W5DZQ9;A0A1D5SPB7	H2KXF7;A0A1D5XHD3;W5DZQ9;A0A1D5SPB7	tr|H2KXF7|H2KXF7_WHEAT Pathogenesis-related protein OS=Triticum aestivum GN=PRP PE=2 SV=1;tr|A0A1D5XHD3|A0A1D5XHD3_WHEAT Uncharacterized protein OS=Triticum aestivum PE=3 SV=1;tr|W5DZQ9|W5DZQ9_WHEAT Uncharacterized protein OS=Triticum aestivum PE=4 SV=1;tr	2	2	1	23.4	23.4	12	17.801	209.59	13724000000	290	2.02829	0.0106154	-4.09527	-1.7258	25.35	26.5853	25.3441	25.7444	26.0467	24.6522	32.0252	30.2779	30.5399	30.9321	29.5066	28.2905	H2KXF7	162414848	ABX89061.1	pathogenesis-related protein	bread wheat	Triticum aestivum
	+	1.30311	5.83746	W5D2I6;Q9ATG4;L7Q3U1	W5D2I6;Q9ATG4;L7Q3U1	tr|W5D2I6|W5D2I6_WHEAT Non-specific lipid-transfer protein OS=Triticum aestivum GN=TRAES_3BF088300010CFD_c1 PE=3 SV=1;tr|Q9ATG4|Q9ATG4_WHEAT Non-specific lipid-transfer protein OS=Triticum aestivum GN=LTP2 PE=2 SV=1;tr|L7Q3U1|L7Q3U1_WHEAT Non-specific lipi	8	8	0	75	75	0	17.033	323.31	10126000000	83	1.35786	0.0286085	-3.11771	-1.21172	28.441	26.9328	27.7184	24.5366	26.4955	26.8439	31.4543	28.7645	30.5344	30.6321	27.996	28.601	W5D2I6	13375563	AAK20395.1	lipid transfer protein precursor	bread wheat	Triticum aestivum
	+	4.13553	-7.39263	Q9SQG3;O64393	Q9SQG3;O64393	tr|Q9SQG3|Q9SQG3_WHEAT PR-4 (Fragment) OS=Triticum aestivum PE=2 SV=1;sp|O64393|WHW2_WHEAT Wheatwin-2 OS=Triticum aestivum GN=PR4B PE=1 SV=1	2	2	2	14.8	14.8	14.8	11.228	30.671	46572000000	43	1.30311	0.0124331	5.83746	1.62199	32.5141	31.9394	32.0041	32.832	32.6049	31.8941	25.9385	24.9877	25.5406	25.3611	30.666	23.7915	Q9SQG3	6048569	AAF02296.1	PR-4, partial	bread wheat	Triticum aestivum
	+	3.3369	-5.08102	O82714	O82714	tr|O82714|O82714_WHEAT Pathogenesis-related protein 1-3 OS=Triticum aestivum GN=PR-1.1 PE=2 SV=1	2	1	1	16.7	10.8	10.8	13.108	182.07	129840000000	334	4.13553	0	-7.39263	-3.8117	29.0701	32.567	24.4106	25.7704	25.4962	25.757	33.9582	34.8231	32.5478	32.5446	32.7363	33.9206	O82714	3702663	CAA07473.1	pathogenisis-related protein 1.1	bread wheat	Triticum aestivum
	+	2.44016	-3.13833	O82716;A0A1D5W683	O82716;A0A1D5W683	tr|O82716|O82716_WHEAT Glucan endo-1,3-beta-D-glucosidase OS=Triticum aestivum PE=2 SV=1;tr|A0A1D5W683|A0A1D5W683_WHEAT Uncharacterized protein OS=Triticum aestivum PE=3 SV=1	10	5	3	61	32.3	17.1	17.651	107.11	225950000000	628	3.3369	0.00419512	-5.08102	-2.56278	29.7852	29.6735	30.0513	28.3464	29.355	28.4489	35.7012	35.6124	34.1233	34.3077	33.9852	33.1005	O82716	3757682	CAA77085.1	glucan endo-1,3-beta-D-glucosidase	bread wheat	Triticum aestivum
	+	2.19772	-4.22988	Q1ERG1	Q1ERG1	tr|Q1ERG1|Q1ERG1_WHEAT Endo-beta-1,3-glucanase OS=Triticum aestivum GN=TaGlb2b PE=2 SV=1	17	16	3	77	77	11.6	35.412	323.31	1304200000000	3475	2.44016	0.0133131	-3.13833	-1.55861	34.4125	36.1732	34.5856	33.2462	33.8045	33.8849	37.4551	37.5789	36.0493	36.0038	36.7105	37.6362	Q1ERG1	109150350	BAE96090.1	endo-beta-1,3-glucanase	bread wheat	Triticum aestivum
	+	1.59215	-4.28426	Q1ERG2;A0A1D6RSX2;A0A1D5V928;Q1ERG0;Q1ERF9	Q1ERG2	tr|Q1ERG2|Q1ERG2_WHEAT Endo-beta-1,3-glucanase OS=Triticum aestivum GN=TaGlb2a PE=2 SV=1	13	13	3	35	35	8.2	35.937	323.31	221960000000	781	2.19772	0.0101597	-4.22988	-1.83324	30.6459	29.7827	29.9101	28.8594	28.7021	28.2249	36.2932	34.5381	34.2389	34.2582	32.6624	31.5555	Q1ERG2	109150348	BAE96089.1	endo-beta-1,3-glucanase	bread wheat	Triticum aestivum
	+	3.03337	-3.09943	Q43212	Q43212	tr|Q43212|Q43212_WHEAT Peroxidase OS=Triticum aestivum PE=2 SV=1	10	5	5	33.3	19	19	36.186	323.31	87853000000	246	1.59215	0.0133945	-4.28426	-1.56671	29.1943	29.1365	28.9975	28.049	25.765	27.9895	35.193	33.4839	32.7807	33.3048	31.4329	29.9184	Q43212	21829	CAA39486.1	peroxidase	bread wheat	Triticum aestivum
	+	2.04476	-2.49958	Q45FE8	Q45FE8	tr|Q45FE8|Q45FE8_WHEAT 4-hydroxyphenylpyruvate dioxygenase OS=Triticum aestivum PE=2 SV=1	11	3	3	46.5	9.6	9.6	32.727	323.31	17800000000	89	3.03337	0.0105772	-3.09943	-1.67282	28.2915	28.2181	28.2777	27.2547	26.3668	27.4568	32.197	32.2608	29.5953	30.0804	30.337	29.9591	Q45FE8	72256523	AAZ67144.1	4-hydroxyphenylpyruvate dioxygenase	bread wheat	Triticum aestivum
	+	3.67725	-3.81355	Q4JK90;Q4JH28;A0A0A7ABW8	Q4JK90;Q4JH28;A0A0A7ABW8	tr|Q4JK90|Q4JK90_WHEAT Beta-1,3-glucanase OS=Triticum aestivum PE=2 SV=1;tr|Q4JH28|Q4JH28_WHEAT Beta-1,3-glucanase OS=Triticum aestivum PE=2 SV=1;tr|A0A0A7ABW8|A0A0A7ABW8_WHEAT Beta-1,3-endoglucanase (Fragment) OS=Triticum aestivum GN=PR-2-1c PE=2 SV=1	18	3	0	48.2	13.5	0	46.702	98.43	3520800000	39	2.04476	0.0272364	-2.49958	-1.23311	26.6313	26.4865	27.1383	26.0163	24.9219	26.3991	28.5069	28.3756	28.668	28.1833	27.8376	28.8151	Q4JK90	68250406	AAY88778.1	beta-1,3-glucanase	bread wheat	Triticum aestivum
	+	3.98253	-3.4416	Q7XY25;W5AQ87	Q7XY25;W5AQ87	tr|Q7XY25|Q7XY25_WHEAT Glutaredoxin OS=Triticum aestivum PE=2 SV=1;tr|W5AQ87|W5AQ87_WHEAT Uncharacterized protein OS=Triticum aestivum PE=4 SV=1	17	4	4	76.9	20.4	20.4	35.385	323.31	183060000000	789	3.67725	0.00723153	-3.81355	-2.12295	30.7279	32.9106	31.3981	29.8677	30.2715	30.5658	34.6651	34.6001	33.101	33.8235	33.8407	34.4814	Q7XY25	32401362	AAP80853.1	glutaredoxin	bread wheat	Triticum aestivum
	+	2.50182	-3.20865	Q8GRI3;W4ZVT7	Q8GRI3;W4ZVT7	tr|Q8GRI3|Q8GRI3_WHEAT Glutathione transferase OS=Triticum aestivum GN=gstf6 PE=2 SV=1;tr|W4ZVT7|W4ZVT7_WHEAT Uncharacterized protein OS=Triticum aestivum PE=3 SV=1	5	3	3	54.9	31	31	11.709	25.086	3776700000	56	3.98253	0.00846957	-3.4416	-1.99666	25.022	27.5891	25.6691	25.4483	24.9437	24.9366	29.4081	28.6008	28.9327	28.335	28.489	28.8294	Q8GRI3	23504747	CAD29479.1	glutathione transferase F6	bread wheat	Triticum aestivum
	+	1.79328	-2.68008	Q8GVD3;A0A1D5UBI2;A0A1D6RNH0	Q8GVD3;A0A1D5UBI2;A0A1D6RNH0	tr|Q8GVD3|Q8GVD3_WHEAT Thioredoxin OS=Triticum aestivum PE=2 SV=1;tr|A0A1D5UBI2|A0A1D5UBI2_WHEAT Uncharacterized protein OS=Triticum aestivum PE=4 SV=1;tr|A0A1D6RNH0|A0A1D6RNH0_WHEAT Uncharacterized protein OS=Triticum aestivum PE=4 SV=1	8	3	1	43.6	21.6	17.9	24.803	6.6096	5898100000	55	2.50182	0.012525	-3.20865	-1.60016	29.4288	26.4783	29.0024	24.5327	25.386	25.8308	29.5601	28.9252	29.203	29.0261	28.473	27.8764	Q8GVD3	27461140	AAL67139.1	thioredoxin H	bread wheat	Triticum aestivum
	+	1.39378	-5.93852	Q8S4P7	Q8S4P7	tr|Q8S4P7|Q8S4P7_WHEAT Thaumatin-like protein OS=Triticum aestivum PE=2 SV=1	7	6	6	53.4	53.4	53.4	12.694	62.345	3675200000	30	1.79328	0.0270959	-2.68008	-1.23529	23.9805	27.6371	25.3625	24.6826	26.009	25.0451	29.7488	28.9982	28.6315	26.8621	28.6211	28.2936	Q8S4P7	20257409	AAM15877.1	thaumatin-like protein	bread wheat	Triticum aestivum
	+	3.99778	-6.32943	tr|A0A180H0N9|A0A180H0N9_PUCT1;tr|A0A0C4DEZ9|A0A0C4DEZ9_PUCT1	tr|A0A180H0N9|A0A180H0N9_PUCT1;tr|A0A0C4DEZ9|A0A0C4DEZ9_PUCT1	tr|A0A180H0N9|A0A180H0N9_PUCT1 Superoxide dismutase OS=Puccinia triticina (isolate 1-1 / race 1 (BBBD)) GN=PTTG_09275 PE=3 SV=1;tr|A0A0C4DEZ9|A0A0C4DEZ9_PUCT1 Superoxide dismutase OS=Puccinia triticina (isolate 1-1 / race 1 (BBBD)) GN=PTTG_09275 PE=3 SV=1	4	1	1	25.8	8.4	8.4	23.598	160.36	87791000000	215	1.39378	0.0106486	-5.93852	-1.70309	30.2361	32.3325	29.8714	25.2874	29.433	22.9619	34.1562	32.9371	32.8503	32.0362	32.7642	30.6975	A0A180H0N9	403163059	XP_003323191.2	Fe-Mn family superoxide dismutase	Puccinia graminis f. sp. tritici CRL 75-36-700-3	Puccinia graminis f. sp. tritici CRL 75-36-700-3
	+	3.37189	-4.94974	tr|A0A0C4DF31|A0A0C4DF31_PUCT1	tr|A0A0C4DF31|A0A0C4DF31_PUCT1	tr|A0A0C4DF31|A0A0C4DF31_PUCT1 Glycerol-3-phosphate dehydrogenase [NAD(+)] OS=Puccinia triticina (isolate 1-1 / race 1 (BBBD)) GN=PTTG_03574 PE=3 SV=1	11	11	11	62.2	62.2	62.2	22.292	103.29	9261900000	80	3.99778	0	-6.32943	-3.3178	24.0022	25.2841	25.7361	24.407	25.4326	24.5874	25.8921	24.2975	24.8333	30.9919	31.6392	30.7841	A0A0C4DF31	1034737969	OAV92022.1	glycerol-3-phosphate dehydrogenase	Puccinia triticina 1-1 BBBD Race 1	Puccinia triticina 1-1 BBBD Race 1
	+	3.66328	-4.72543	tr|A0A0C4DF71|A0A0C4DF71_PUCT1;tr|A0A0C4ERM5|A0A0C4ERM5_PUCT1	tr|A0A0C4DF71|A0A0C4DF71_PUCT1	tr|A0A0C4DF71|A0A0C4DF71_PUCT1 40S ribosomal protein S7 OS=Puccinia triticina (isolate 1-1 / race 1 (BBBD)) GN=PTTG_03711 PE=4 SV=1	12	12	12	42.5	42.5	42.5	37.971	46.32	3266700000	38	3.37189	0.00475188	-4.94974	-2.52473	25.281	24.6567	25.5267	24.3276	24.3129	25.6269	25.0455	25.0078	24.1487	29.5051	29.9978	29.6138	A0A0C4DF71	1034738128	OAV92178.1	40S ribosomal protein S7	Puccinia triticina 1-1 BBBD Race 1	Puccinia triticina 1-1 BBBD Race 1
	+	2.79639	-5.08314	tr|A0A0C4DF98|A0A0C4DF98_PUCT1;tr|A0A180GC28|A0A180GC28_PUCT1	tr|A0A0C4DF98|A0A0C4DF98_PUCT1;tr|A0A180GC28|A0A180GC28_PUCT1	tr|A0A0C4DF98|A0A0C4DF98_PUCT1 Proteasome subunit alpha type OS=Puccinia triticina (isolate 1-1 / race 1 (BBBD)) PE=3 SV=1;tr|A0A180GC28|A0A180GC28_PUCT1 Proteasome endopeptidase complex OS=Puccinia triticina (isolate 1-1 / race 1 (BBBD)) GN=PTTG_07948 PE=	7	7	7	48	48	48	22.566	33.995	3015100000	43	3.66328	0.00478788	-4.72543	-2.52665	27.1129	25.437	24.8975	24.3342	25.5404	24.5981	25.2832	25.7767	23.5119	29.6447	29.5506	29.4536	A0A0C4DF98	403160142	XP_003320696.2	20S proteasome subunit alpha 3	Puccinia graminis f. sp. tritici CRL 75-36-700-3	Puccinia graminis f. sp. tritici CRL 75-36-700-3
	+	3.60237	-5.57965	tr|A0A0C4DFB9|A0A0C4DFB9_PUCT1	tr|A0A0C4DFB9|A0A0C4DFB9_PUCT1	tr|A0A0C4DFB9|A0A0C4DFB9_PUCT1 3-isopropylmalate dehydrogenase OS=Puccinia triticina (isolate 1-1 / race 1 (BBBD)) GN=PTTG_08592 PE=3 SV=1	12	12	11	55.3	55.3	52.2	31.956	195.31	8790700000	65	2.79639	0.00539877	-5.08314	-2.34493	25.9707	26.9494	26.3208	24.5326	24.4652	26.4892	25.1495	25.5815	25.0795	30.2685	30.3589	30.1091	A0A0C4DFB9	1034739912	OAV93939.1	3-isopropylmalate dehydrogenase	Puccinia triticina 1-1 BBBD Race 1	Puccinia triticina 1-1 BBBD Race 1
	+	3.12934	-5.74818	tr|A0A0C4DFI4|A0A0C4DFI4_PUCT1	tr|A0A0C4DFI4|A0A0C4DFI4_PUCT1	tr|A0A0C4DFI4|A0A0C4DFI4_PUCT1 Cytochrome c OS=Puccinia triticina (isolate 1-1 / race 1 (BBBD)) GN=PTTG_03577 PE=3 SV=1	18	18	8	48	48	28.2	39.877	319.63	8592100000	126	3.60237	0.0022069	-5.57965	-2.85682	25.113	25.1559	25.1608	24.6821	25.8245	26.0649	25.877	24.7969	24.5453	31.3502	31.1363	30.824	A0A0C4DFI4	1034737965	OAV92018.1	cytochrome c	Puccinia triticina 1-1 BBBD Race 1	Puccinia triticina 1-1 BBBD Race 1
	+	4.20757	-3.53569	tr|A0A0C4DFJ3|A0A0C4DFJ3_PUCT1	tr|A0A0C4DFJ3|A0A0C4DFJ3_PUCT1	tr|A0A0C4DFJ3|A0A0C4DFJ3_PUCT1 Uncharacterized protein OS=Puccinia triticina (isolate 1-1 / race 1 (BBBD)) GN=PTTG_08898 PE=3 SV=1	10	10	9	66.1	66.1	59.8	12.236	72.267	6778200000	68	3.12934	0.00272	-5.74818	-2.71424	25.5615	24.6948	24.739	25.5127	25.6749	23.8005	25.4561	24.8226	25.6705	30.4507	30.9343	30.8476	A0A0C4DFJ3	1317363681	PKY47709.1	cytochrome b5	Rhizophagus irregularis	Rhizophagus irregularis
	+	2.9091	-4.29421	tr|A0A0C4DFJ4|A0A0C4DFJ4_PUCT1;REV__Q8L805	tr|A0A0C4DFJ4|A0A0C4DFJ4_PUCT1	tr|A0A0C4DFJ4|A0A0C4DFJ4_PUCT1 40S ribosomal protein S19-A OS=Puccinia triticina (isolate 1-1 / race 1 (BBBD)) GN=PTTG_05323 PE=4 SV=1	6	6	6	79.8	79.8	79.8	12.431	68.19	3483100000	41	4.20757	0.00758491	-3.53569	-2.07792	25.0252	24.5864	26.4998	26.3329	25.9817	26.1735	25.5091	24.8344	24.3803	29.8173	29.9224	29.3555	A0A0C4DFJ4	1034743313	OAV97309.1	40S ribosomal protein S19-A	Puccinia triticina 1-1 BBBD Race 1	Puccinia triticina 1-1 BBBD Race 1
	+	3.70344	-4.27057	tr|A0A0C4EH00|A0A0C4EH00_PUCT1;tr|A0A180H3T8|A0A180H3T8_PUCT1	tr|A0A0C4EH00|A0A0C4EH00_PUCT1;tr|A0A180H3T8|A0A180H3T8_PUCT1	tr|A0A0C4EH00|A0A0C4EH00_PUCT1 Uncharacterized protein OS=Puccinia triticina (isolate 1-1 / race 1 (BBBD)) PE=3 SV=1;tr|A0A180H3T8|A0A180H3T8_PUCT1 Uncharacterized protein OS=Puccinia triticina (isolate 1-1 / race 1 (BBBD)) GN=PTTG_00016 PE=3 SV=1	6	6	6	37.3	37.3	37.3	16.718	63.582	5432200000	34	2.9091	0.00719608	-4.29421	-2.11869	25.5214	25.0137	25.1051	25.8293	25.4107	27.1557	26.0309	26.3638	24.7981	30.4178	30.4813	30.3793	A0A0C4EH00	599400301	XP_007412216.1	subtilisin protease	Melampsora larici-populina 98AG31	Melampsora larici-populina 98AG31
	+	3.23738	-3.25732	tr|A0A0C4EH25|A0A0C4EH25_PUCT1	tr|A0A0C4EH25|A0A0C4EH25_PUCT1	tr|A0A0C4EH25|A0A0C4EH25_PUCT1 Isocitrate dehydrogenase [NAD] subunit, mitochondrial OS=Puccinia triticina (isolate 1-1 / race 1 (BBBD)) GN=PTTG_00041 PE=3 SV=1	7	7	7	30.4	30.4	30.4	52.774	191.64	1439600000	29	3.70344	0.00533333	-4.27057	-2.33773	24.681	26.0648	25.3172	24.6759	23.812	24.1029	24.1573	23.9587	24.2568	28.1461	28.4052	28.8511	A0A0C4EH25	1034736657	OAV90734.1	isocitrate dehydrogenase (NAD+)	Puccinia triticina 1-1 BBBD Race 1	Puccinia triticina 1-1 BBBD Race 1
	+	2.55729	-4.04549	tr|A0A0C4EMY9|A0A0C4EMY9_PUCT1;tr|A0A180GTH7|A0A180GTH7_PUCT1;tr|A0A180GPF2|A0A180GPF2_PUCT1;tr|A0A0C4EHA7|A0A0C4EHA7_PUCT1	tr|A0A0C4EMY9|A0A0C4EMY9_PUCT1;tr|A0A180GTH7|A0A180GTH7_PUCT1;tr|A0A180GPF2|A0A180GPF2_PUCT1;tr|A0A0C4EHA7|A0A0C4EHA7_PUCT1	tr|A0A0C4EMY9|A0A0C4EMY9_PUCT1 Uncharacterized protein OS=Puccinia triticina (isolate 1-1 / race 1 (BBBD)) PE=3 SV=1;tr|A0A180GTH7|A0A180GTH7_PUCT1 40S ribosomal protein S5 OS=Puccinia triticina (isolate 1-1 / race 1 (BBBD)) GN=PTTG_02129 PE=3 SV=1;tr|A0A1	9	9	9	28.1	28.1	28.1	41.767	37.097	1142900000	24	3.23738	0.0105507	-3.25732	-1.78167	25.7768	25.5124	24.6514	24.4759	24.7631	25.3939	24.2534	24.7393	24.3415	28.5007	27.9034	28.0008	A0A0C4EMY9	1034742102	OAV96106.1	40S ribosomal protein S5	Puccinia triticina 1-1 BBBD Race 1	Puccinia triticina 1-1 BBBD Race 1
	+	2.99458	-3.90307	tr|A0A0C4EHC6|A0A0C4EHC6_PUCT1;tr|A0A0C4FDU0|A0A0C4FDU0_PUCT1	tr|A0A0C4EHC6|A0A0C4EHC6_PUCT1	tr|A0A0C4EHC6|A0A0C4EHC6_PUCT1 60S ribosomal protein L20 OS=Puccinia triticina (isolate 1-1 / race 1 (BBBD)) GN=PTTG_00142 PE=3 SV=1	7	6	6	31.2	26.7	26.7	22.221	8.0501	2561800000	20	2.55729	0.00832258	-4.04549	-1.9124	25.8868	23.8227	24.1725	24.8758	26.3668	24.4628	24.7879	24.3743	24.5499	29.1145	29.6989	29.0285	A0A0C4EHC6	1034724239	OAV85110.1	60S ribosomal protein L20	Puccinia triticina 1-1 BBBD Race 1	Puccinia triticina 1-1 BBBD Race 1
	+	3.38018	-2.91953	tr|A0A0C4EHF8|A0A0C4EHF8_PUCT1	tr|A0A0C4EHF8|A0A0C4EHF8_PUCT1	tr|A0A0C4EHF8|A0A0C4EHF8_PUCT1 Uncharacterized protein OS=Puccinia triticina (isolate 1-1 / race 1 (BBBD)) GN=PTTG_00174 PE=4 SV=1	6	6	6	30.2	30.2	30.2	20.472	18.826	2646100000	22	2.99458	0.00850655	-3.90307	-1.99668	23.0729	26.2144	25.9203	25.6562	24.8277	25.6567	24.5942	23.8224	24.6831	29.9839	28.78	29.0861	A0A0C4EHF8	1034743454	OAV97449.1	hypothetical protein PTTG_00174	Puccinia triticina 1-1 BBBD Race 1	Puccinia triticina 1-1 BBBD Race 1
	+	3.77753	-5.53467	tr|A0A180GYX2|A0A180GYX2_PUCT1;tr|A0A0C4EHG0|A0A0C4EHG0_PUCT1	tr|A0A180GYX2|A0A180GYX2_PUCT1;tr|A0A0C4EHG0|A0A0C4EHG0_PUCT1	tr|A0A180GYX2|A0A180GYX2_PUCT1 Uncharacterized protein OS=Puccinia triticina (isolate 1-1 / race 1 (BBBD)) GN=PTTG_00176 PE=3 SV=1;tr|A0A0C4EHG0|A0A0C4EHG0_PUCT1 Uncharacterized protein OS=Puccinia triticina (isolate 1-1 / race 1 (BBBD)) PE=3 SV=1	5	5	5	29.1	29.1	29.1	35.42	26.123	740540000	11	3.38018	0.0117639	-2.91953	-1.64918	24.657	25.9765	24.4287	24.9329	24.4458	24.7531	25.4749	24.5019	25.323	27.2039	27.6941	27.9924	A0A180GYX2	403177241	XP_003335788.2	E3 ubiquitin ligase complex SCF subunit sconC	Puccinia graminis f. sp. tritici CRL 75-36-700-3	Puccinia graminis f. sp. tritici CRL 75-36-700-3
	+	4.34887	-4.5094	tr|A0A0C4EHJ6|A0A0C4EHJ6_PUCT1	tr|A0A0C4EHJ6|A0A0C4EHJ6_PUCT1	tr|A0A0C4EHJ6|A0A0C4EHJ6_PUCT1 Uncharacterized protein OS=Puccinia triticina (isolate 1-1 / race 1 (BBBD)) GN=PTTG_00212 PE=4 SV=1	7	7	7	16.6	16.6	16.6	29.309	83.89	6187500000	52	3.77753	0.00234146	-5.53467	-2.90454	23.8452	26.3333	24.3426	25.6995	25.1559	24.4322	25.1434	23.4571	25.1163	30.4773	30.9746	30.4397	A0A0C4EHJ6	331213433	XP_003319398.1	60S ribosomal protein L13	Puccinia graminis f. sp. tritici CRL 75-36-700-3	Puccinia graminis f. sp. tritici CRL 75-36-700-3
	+	2.5562	-3.16837	tr|A0A0C4EHW6|A0A0C4EHW6_PUCT1;tr|A0A180H103|A0A180H103_PUCT1	tr|A0A0C4EHW6|A0A0C4EHW6_PUCT1;tr|A0A180H103|A0A180H103_PUCT1	tr|A0A0C4EHW6|A0A0C4EHW6_PUCT1 Uncharacterized protein OS=Puccinia triticina (isolate 1-1 / race 1 (BBBD)) PE=4 SV=1;tr|A0A180H103|A0A180H103_PUCT1 Dihydroxy-acid dehydratase OS=Puccinia triticina (isolate 1-1 / race 1 (BBBD)) GN=PTTG_00332 PE=3 SV=1	5	5	3	30.6	30.6	20.1	23.664	25.438	5406700000	27	4.34887	0.00441026	-4.5094	-2.59641	25.5325	25.6366	26.56	25.5262	25.9822	25.9559	25.2046	24.9312	25.989	29.962	30.5396	30.4908	A0A0C4EHW6	1034744299	OAV98289.1	dihydroxy-acid dehydratase	Puccinia triticina 1-1 BBBD Race 1	Puccinia triticina 1-1 BBBD Race 1
	+	2.97725	-3.92543	tr|A0A0C4EI16|A0A0C4EI16_PUCT1	tr|A0A0C4EI16|A0A0C4EI16_PUCT1	tr|A0A0C4EI16|A0A0C4EI16_PUCT1 50S ribosomal protein L22 OS=Puccinia triticina (isolate 1-1 / race 1 (BBBD)) GN=PTTG_00382 PE=3 SV=1	5	5	5	17.6	17.6	17.6	42.803	39.079	800870000	23	2.98975	0.0481094	-1.86506	-1.08563	25.1246	25.9242	25.293	25.4831	25.9882	26.0211	26.5867	24.7977	25.6833	27.4363	27.8575	27.7938	A0A0C4EI16	1034744346	OAV98336.1	50S ribosomal protein L22	Puccinia triticina 1-1 BBBD Race 1	Puccinia triticina 1-1 BBBD Race 1
	+	2.67203	-6.08264	tr|A0A0C4EI22|A0A0C4EI22_PUCT1	tr|A0A0C4EI22|A0A0C4EI22_PUCT1	tr|A0A0C4EI22|A0A0C4EI22_PUCT1 60S ribosomal protein L12 OS=Puccinia triticina (isolate 1-1 / race 1 (BBBD)) GN=PTTG_00388 PE=3 SV=1	7	7	6	18.2	18.2	16.4	62.275	20.849	930200000	28	2.5562	0.0127227	-3.16837	-1.59833	25.0853	25.4963	24.3646	25.068	25.3295	23.8301	24.4684	26.2437	23.7088	27.9051	27.6764	28.1512	A0A0C4EI22	1034744352	OAV98342.1	60S ribosomal protein L12	Puccinia triticina 1-1 BBBD Race 1	Puccinia triticina 1-1 BBBD Race 1
	+	3.69921	-6.11658	tr|A0A0C4EI30|A0A0C4EI30_PUCT1;tr|A0A180GZS4|A0A180GZS4_PUCT1	tr|A0A0C4EI30|A0A0C4EI30_PUCT1;tr|A0A180GZS4|A0A180GZS4_PUCT1	tr|A0A0C4EI30|A0A0C4EI30_PUCT1 Uncharacterized protein OS=Puccinia triticina (isolate 1-1 / race 1 (BBBD)) PE=4 SV=1;tr|A0A180GZS4|A0A180GZS4_PUCT1 Uncharacterized protein OS=Puccinia triticina (isolate 1-1 / race 1 (BBBD)) GN=PTTG_00396 PE=4 SV=1	6	6	6	14.7	14.7	14.7	56.749	11.454	410250000	11	2.66384	0.0365797	-2.04735	-1.14273	25.225	24.9553	24.7139	24.5126	25.4655	25.132	24.911	24.6192	25.5709	27.0098	27.2523	26.99	A0A0C4EI30	1394851996	PWY98809.1	RNA-binding domain-containing protein	Testicularia cyperi	Testicularia cyperi
	+	3.56545	-5.40858	tr|A0A0C4EIE4|A0A0C4EIE4_PUCT1	tr|A0A0C4EIE4|A0A0C4EIE4_PUCT1	tr|A0A0C4EIE4|A0A0C4EIE4_PUCT1 Uncharacterized protein OS=Puccinia triticina (isolate 1-1 / race 1 (BBBD)) GN=PTTG_00511 PE=4 SV=1	4	4	4	29.5	29.5	29.5	21.122	54.526	1567200000	12	2.97725	0.008	-3.92543	-2.00054	25.6707	25.123	26.3756	25.1018	24.3905	23.7166	24.2311	24.2382	24.3114	28.1565	28.7869	28.0418	A0A0C4EIE4	1022852624	XP_016271995.1	RAN protein binding protein	Rhodotorula toruloides;Rhodotorula toruloides NP11	Rhodotorula toruloides;Rhodotorula toruloides NP11
	+	3.39191	-4.67669	tr|A0A0C4EIF4|A0A0C4EIF4_PUCT1;tr|A0A180H4E3|A0A180H4E3_PUCT1	tr|A0A0C4EIF4|A0A0C4EIF4_PUCT1;tr|A0A180H4E3|A0A180H4E3_PUCT1	tr|A0A0C4EIF4|A0A0C4EIF4_PUCT1 ATP synthase subunit alpha OS=Puccinia triticina (isolate 1-1 / race 1 (BBBD)) PE=3 SV=1;tr|A0A180H4E3|A0A180H4E3_PUCT1 ATP synthase subunit alpha OS=Puccinia triticina (isolate 1-1 / race 1 (BBBD)) GN=PTTG_00521 PE=3 SV=1	6	5	5	43.6	38.2	38.2	17.639	187.42	6805000000	62	2.67203	0.00437288	-6.08264	-2.57511	25.1411	26.2149	26.3728	25.9228	24.9678	23.0988	26.7444	25.3951	26.2023	31.21	30.4457	30.5816	A0A0C4EIF4	1034745707	OAV99691.1	ATP synthase subunit alpha, mitochondrial	Puccinia triticina 1-1 BBBD Race 1	Puccinia triticina 1-1 BBBD Race 1
	+	1.92251	-2.56228	tr|A0A0C4EIJ3|A0A0C4EIJ3_PUCT1	tr|A0A0C4EIJ3|A0A0C4EIJ3_PUCT1	tr|A0A0C4EIJ3|A0A0C4EIJ3_PUCT1 40S ribosomal protein S15 OS=Puccinia triticina (isolate 1-1 / race 1 (BBBD)) GN=PTTG_00560 PE=3 SV=1	6	6	6	56.1	56.1	56.1	16.604	323.31	14125000000	104	3.69921	0.00113433	-6.11658	-3.10609	23.9944	25.9402	24.8233	26.5204	25.4585	24.9773	26.4383	25.106	23.5517	31.913	31.8428	31.55	A0A0C4EIJ3	1034745647	OAV99631.1	40S ribosomal protein S15	Puccinia triticina 1-1 BBBD Race 1	Puccinia triticina 1-1 BBBD Race 1
	+	3.81435	-4.71481	tr|A0A0C4EIJ4|A0A0C4EIJ4_PUCT1	tr|A0A0C4EIJ4|A0A0C4EIJ4_PUCT1	tr|A0A0C4EIJ4|A0A0C4EIJ4_PUCT1 Uncharacterized protein OS=Puccinia triticina (isolate 1-1 / race 1 (BBBD)) GN=PTTG_00561 PE=3 SV=1	12	12	12	36.6	36.6	36.6	58.903	89.191	7010400000	69	3.56545	0.00277551	-5.40858	-2.77526	24.6737	24.9145	25.0789	25.7832	25.8878	24.5553	25.5332	25.7532	25.3364	30.8439	30.5698	31.0383	A0A0C4EIJ4	1488171317	RKP29054.1	ribosomal protein P2 beta	Metschnikowia bicuspidata	Metschnikowia bicuspidata
	+	4.80615	-7.11127	tr|A0A0C4EIL9|A0A0C4EIL9_PUCT1	tr|A0A0C4EIL9|A0A0C4EIL9_PUCT1	tr|A0A0C4EIL9|A0A0C4EIL9_PUCT1 Uncharacterized protein OS=Puccinia triticina (isolate 1-1 / race 1 (BBBD)) PE=4 SV=1	8	4	4	18.6	11.9	11.9	61.463	14.335	5305600000	24	3.39191	0.00413072	-4.67669	-2.42319	23.5827	24.8394	25.6337	25.3215	26.277	25.4825	25.8046	25.1958	25.0058	29.7695	30.8197	30.5219	A0A0C4EIL9	648209072	AIC33794.1	peptidase M17, partial	Puccinia cf. psidii AE-2014	Puccinia cf. psidii AE-2014
	+	3.78418	-3.6924	tr|A0A0C4EIQ8|A0A0C4EIQ8_PUCT1	tr|A0A0C4EIQ8|A0A0C4EIQ8_PUCT1	tr|A0A0C4EIQ8|A0A0C4EIQ8_PUCT1 Uncharacterized protein OS=Puccinia triticina (isolate 1-1 / race 1 (BBBD)) PE=4 SV=1	5	5	5	36.4	36.4	36.4	17.658	71.978	1789300000	38	1.92251	0.0275747	-2.56228	-1.22825	25.4795	26.1153	25.2439	27.3268	26.3567	25.3533	25.2489	24.1299	24.2018	29.0668	28.6337	29.0231	A0A0C4EIQ8	913877868	KNZ61609.1	fatty acid synthase subunit beta	Puccinia sorghi	Puccinia sorghi
	+	3.99597	-3.9389	tr|A0A0C4EIX2|A0A0C4EIX2_PUCT1	tr|A0A0C4EIX2|A0A0C4EIX2_PUCT1	tr|A0A0C4EIX2|A0A0C4EIX2_PUCT1 40S ribosomal protein S3 OS=Puccinia triticina (isolate 1-1 / race 1 (BBBD)) GN=PTTG_00689 PE=4 SV=1	3	3	3	50	50	50	11.283	140.31	3567600000	29	3.81435	0.00426446	-4.71481	-2.56507	24.9053	25.5799	25.6823	24.7327	25.5668	24.8397	24.159	26.0923	24.455	29.4133	29.7203	30.15	A0A0C4EIX2	1034734003	OAV88186.1	40S ribosomal protein S3	Puccinia triticina 1-1 BBBD Race 1	Puccinia triticina 1-1 BBBD Race 1
	+	5.60272	-6.50879	tr|A0A0C4EIX9|A0A0C4EIX9_PUCT1	tr|A0A0C4EIX9|A0A0C4EIX9_PUCT1	tr|A0A0C4EIX9|A0A0C4EIX9_PUCT1 Uncharacterized protein OS=Puccinia triticina (isolate 1-1 / race 1 (BBBD)) GN=PTTG_00696 PE=4 SV=1	15	15	1	37.2	37.2	5.3	56.102	323.31	22685000000	213	4.80615	0	-7.11127	-3.98068	24.9886	26.0187	25.943	25.0713	25.8781	25.0371	25.725	25.0342	25.1615	32.3022	32.5818	32.4364	A0A0C4EIX9	814544033	CEQ38927.1	SPOSA6832_00410, partial	Sporidiobolus salmonicolor	Sporidiobolus salmonicolor
	+	2.10175	-2.97224	tr|A0A0C4EJ20|A0A0C4EJ20_PUCT1	tr|A0A0C4EJ20|A0A0C4EJ20_PUCT1	tr|A0A0C4EJ20|A0A0C4EJ20_PUCT1 Uncharacterized protein OS=Puccinia triticina (isolate 1-1 / race 1 (BBBD)) GN=PTTG_00737 PE=4 SV=1	14	14	2	19.5	19.5	3	105.68	24.132	1308800000	28	3.78418	0.00762085	-3.6924	-2.0867	25.6973	25.0874	25.4503	24.3602	24.9615	24.7138	25.3622	25.3596	25.2492	28.7786	28.21	28.1241	A0A0C4EJ20	1418627110	XP_025351004.1	acyl-CoA N-acyltransferase	Pseudomicrostroma glucosiphilum	Pseudomicrostroma glucosiphilum
	+	3.726	-5.69714	tr|A0A0C4EJ23|A0A0C4EJ23_PUCT1	tr|A0A0C4EJ23|A0A0C4EJ23_PUCT1	tr|A0A0C4EJ23|A0A0C4EJ23_PUCT1 Copper/zinc superoxide dismutase OS=Puccinia triticina (isolate 1-1 / race 1 (BBBD)) GN=PTTG_00740 PE=4 SV=1	9	9	9	43.4	43.4	43.4	29.312	282.25	3624400000	44	3.99597	0.00544262	-3.9389	-2.24567	24.8168	23.73	26.4915	25.2982	26.0676	25.9748	25.3199	26.556	25.4812	29.8205	29.7657	29.5712	A0A0C4EJ23	1034737643	OAV91701.1	copper/zinc superoxide dismutase	Puccinia triticina 1-1 BBBD Race 1	Puccinia triticina 1-1 BBBD Race 1
	+	1.95268	-2.60099	tr|A0A180GR40|A0A180GR40_PUCT1;tr|A0A0C4EJ49|A0A0C4EJ49_PUCT1	tr|A0A180GR40|A0A180GR40_PUCT1;tr|A0A0C4EJ49|A0A0C4EJ49_PUCT1	tr|A0A180GR40|A0A180GR40_PUCT1 ATP phosphoribosyltransferase OS=Puccinia triticina (isolate 1-1 / race 1 (BBBD)) GN=PTTG_00766 PE=3 SV=1;tr|A0A0C4EJ49|A0A0C4EJ49_PUCT1 Uncharacterized protein OS=Puccinia triticina (isolate 1-1 / race 1 (BBBD)) PE=3 SV=1	12	12	12	41.8	41.8	41.8	36.796	119.22	17753000000	58	5.60272	0	-6.50879	-3.90806	24.6234	23.6495	26.2807	25.6034	25.471	25.5134	24.7667	25.5733	24.6235	31.8799	32.3597	31.8746	A0A180GR40	1034740842	OAV94859.1	ATP phosphoribosyltransferase	Puccinia triticina 1-1 BBBD Race 1	Puccinia triticina 1-1 BBBD Race 1
	+	5.52709	-3.35467	tr|A0A0C4EJA2|A0A0C4EJA2_PUCT1;tr|A0A180G3S7|A0A180G3S7_PUCT1;tr|A0A0C4EHH4|A0A0C4EHH4_PUCT1	tr|A0A0C4EJA2|A0A0C4EJA2_PUCT1	tr|A0A0C4EJA2|A0A0C4EJA2_PUCT1 Uncharacterized protein OS=Puccinia triticina (isolate 1-1 / race 1 (BBBD)) GN=PTTG_00819 PE=4 SV=1	6	6	6	45.5	45.5	45.5	21.432	21.467	1089300000	21	2.10175	0.0173225	-2.97224	-1.41285	25.2292	25.2235	25.7454	25.253	26.0032	23.9769	25.9021	24.0089	25.447	27.9896	27.8773	28.2829	A0A0C4EJA2	403161474	XP_003321810.2	asparagine synthase (glutamine-hydrolysing)	Puccinia graminis f. sp. tritici CRL 75-36-700-3	Puccinia graminis f. sp. tritici CRL 75-36-700-3
	+	3.39045	-3.28346	tr|A0A0C4EJI8|A0A0C4EJI8_PUCT1	tr|A0A0C4EJI8|A0A0C4EJI8_PUCT1	tr|A0A0C4EJI8|A0A0C4EJI8_PUCT1 6,7-dimethyl-8-ribityllumazine synthase OS=Puccinia triticina (isolate 1-1 / race 1 (BBBD)) GN=PTTG_00906 PE=4 SV=1	2	2	2	16.7	16.7	16.7	20.097	81.507	3007600000	38	3.726	0.00243038	-5.69714	-2.95153	24.2733	25.0529	24.4426	23.6905	24.364	23.3372	24.6431	25.4096	24.9832	29.0733	29.3174	30.0924	A0A0C4EJI8	1034739262	OAV93296.1	6,7-dimethyl-8-ribityllumazine synthase	Puccinia triticina 1-1 BBBD Race 1	Puccinia triticina 1-1 BBBD Race 1
	+	4.00187	-5.11637	tr|A0A0C4EJJ3|A0A0C4EJJ3_PUCT1	tr|A0A0C4EJJ3|A0A0C4EJJ3_PUCT1	tr|A0A0C4EJJ3|A0A0C4EJJ3_PUCT1 Tubulin-specific chaperone A OS=Puccinia triticina (isolate 1-1 / race 1 (BBBD)) GN=PTTG_00911 PE=3 SV=1	5	5	5	21.7	21.7	21.7	33.574	34.475	1078000000	33	1.95268	0.0258426	-2.60099	-1.24865	25.4291	25.789	26.4951	24.7755	26.2564	25.4099	25.8149	25.2041	24.1712	27.4801	28.8256	27.9391	A0A0C4EJJ3	1034739269	OAV93303.1	tubulin binding cofactor A	Puccinia triticina 1-1 BBBD Race 1	Puccinia triticina 1-1 BBBD Race 1
	+	3.24877	-4.14256	tr|A0A0C4EJM3|A0A0C4EJM3_PUCT1;W5I3L0	tr|A0A0C4EJM3|A0A0C4EJM3_PUCT1	tr|A0A0C4EJM3|A0A0C4EJM3_PUCT1 60S ribosomal protein OS=Puccinia triticina (isolate 1-1 / race 1 (BBBD)) GN=PTTG_00944 PE=3 SV=1	9	9	8	20.4	20.4	17.8	68.606	68.542	1226000000	23	5.52709	0.00712621	-3.35467	-2.11106	25.0015	25.3073	24.9108	25.0933	24.9121	24.8029	24.9606	24.8688	25.0312	28.2611	28.2652	28.3461	A0A0C4EJM3	331228448	XP_003326891.1	60S ribosomal protein L30	Puccinia coronata var. avenae f. sp. avenae;Puccinia graminis f. sp. tritici CRL 75-36-700-3;Puccinia triticina 1-1 BBBD Race 1	Puccinia coronata var. avenae f. sp. avenae;Puccinia graminis f. sp. tritici CRL 75-36-700-3;Puccinia triticina 1-1 BBBD Race 1
	+	3.31678	-3.07411	tr|A0A0C4EJM4|A0A0C4EJM4_PUCT1	tr|A0A0C4EJM4|A0A0C4EJM4_PUCT1	tr|A0A0C4EJM4|A0A0C4EJM4_PUCT1 Uncharacterized protein OS=Puccinia triticina (isolate 1-1 / race 1 (BBBD)) GN=PTTG_00945 PE=3 SV=1	3	3	3	50	50	50	11.163	128.09	1196800000	24	3.39045	0.0105509	-3.28346	-1.82198	25.7637	25.2226	26.0629	24.4122	25.3252	25.1916	24.6899	24.3688	24.1303	28.2627	28.4336	28.083	A0A0C4EJM4	331219046	XP_003322200.1	D-3-phosphoglycerate dehydrogenase	Puccinia graminis f. sp. tritici CRL 75-36-700-3	Puccinia graminis f. sp. tritici CRL 75-36-700-3
	+	2.44492	-3.71595	tr|A0A0C4EJR8|A0A0C4EJR8_PUCT1	tr|A0A0C4EJR8|A0A0C4EJR8_PUCT1	tr|A0A0C4EJR8|A0A0C4EJR8_PUCT1 Uncharacterized protein OS=Puccinia triticina (isolate 1-1 / race 1 (BBBD)) GN=PTTG_00989 PE=3 SV=1	7	7	7	67	67	67	13.168	143.91	3176000000	28	4.00187	0.00289362	-5.11637	-2.79767	25.5454	25.2581	25.5854	24.2296	25.2132	24.4852	25.6458	25.4198	25.9294	29.6516	30.0477	29.5779	A0A0C4EJR8	331226950	XP_003326144.1	40S ribosomal protein S16	Puccinia coronata var. avenae f. sp. avenae;Puccinia graminis f. sp. tritici CRL 75-36-700-3	Puccinia coronata var. avenae f. sp. avenae;Puccinia graminis f. sp. tritici CRL 75-36-700-3
	+	3.73401	-5.09147	tr|A0A0C4EK03|A0A0C4EK03_PUCT1	tr|A0A0C4EK03|A0A0C4EK03_PUCT1	tr|A0A0C4EK03|A0A0C4EK03_PUCT1 Hsp70-like protein OS=Puccinia triticina (isolate 1-1 / race 1 (BBBD)) GN=PTTG_01076 PE=3 SV=1	3	3	3	38.5	38.5	38.5	11.714	49.439	2638500000	26	3.24877	0.00694	-4.14256	-2.16364	25.5112	26.021	25.6143	24.8469	26.1729	25.0467	25.7169	23.1532	23.8937	29.5324	29.419	29.5428	A0A0C4EK03	1034743783	OAV97776.1	hsp70-like protein	Puccinia triticina 1-1 BBBD Race 1	Puccinia triticina 1-1 BBBD Race 1
	+	2.1461	-3.31088	tr|A0A0C4EK24|A0A0C4EK24_PUCT1	tr|A0A0C4EK24|A0A0C4EK24_PUCT1	tr|A0A0C4EK24|A0A0C4EK24_PUCT1 Uncharacterized protein OS=Puccinia triticina (isolate 1-1 / race 1 (BBBD)) GN=PTTG_01097 PE=4 SV=1	9	9	9	30.7	30.7	30.7	51.383	54.701	1798500000	36	3.31678	0.0107577	-3.07411	-1.71212	25.7028	26.1782	24.8472	26.1755	25.9684	25.2539	24.7551	24.6024	26.3048	28.9895	28.6809	28.9498	A0A0C4EK24	1034743756	OAV97749.1	hypothetical protein PTTG_01097	Puccinia triticina 1-1 BBBD Race 1	Puccinia triticina 1-1 BBBD Race 1
	+	3.15422	-3.29297	tr|A0A0C4EKB4|A0A0C4EKB4_PUCT1;tr|A0A180H067|A0A180H067_PUCT1	tr|A0A0C4EKB4|A0A0C4EKB4_PUCT1;tr|A0A180H067|A0A180H067_PUCT1	tr|A0A0C4EKB4|A0A0C4EKB4_PUCT1 Uncharacterized protein OS=Puccinia triticina (isolate 1-1 / race 1 (BBBD)) PE=4 SV=1;tr|A0A180H067|A0A180H067_PUCT1 Uncharacterized protein OS=Puccinia triticina (isolate 1-1 / race 1 (BBBD)) GN=PTTG_01189 PE=4 SV=1	4	4	4	32.5	32.5	32.5	18.489	29.644	1913600000	20	2.44492	0.010363	-3.71595	-1.76425	25.1131	25.2158	25.8915	25.5781	24.0595	26.0568	23.7532	25.7652	24.4706	29.0434	28.8086	28.9901	A0A0C4EKB4	909599928	KNE90477.1	seryl-tRNA synthetase	Puccinia striiformis;Puccinia striiformis f. sp. tritici PST-78	Puccinia striiformis;Puccinia striiformis f. sp. tritici PST-78
	+	2.16146	-4.03123	tr|A0A0C4EKE7|A0A0C4EKE7_PUCT1	tr|A0A0C4EKE7|A0A0C4EKE7_PUCT1	tr|A0A0C4EKE7|A0A0C4EKE7_PUCT1 Uncharacterized protein OS=Puccinia triticina (isolate 1-1 / race 1 (BBBD)) GN=PTTG_01222 PE=3 SV=1	12	11	11	22.9	21.7	21.7	73.625	102.27	5406100000	53	3.73401	0.00269307	-5.09147	-2.70436	24.1925	25.4573	24.8519	24.6845	25.315	25.8819	25.0033	25.1668	24.5469	30.6634	30.3964	30.096	A0A0C4EKE7	1022868175	XP_016269721.1	protein of heat shock protein 70 family	Rhodotorula toruloides;Rhodotorula toruloides NP11	Rhodotorula toruloides;Rhodotorula toruloides NP11
	+	3.00723	-2.53657	tr|A0A0C4EKM7|A0A0C4EKM7_PUCT1;tr|A0A180GXH5|A0A180GXH5_PUCT1	tr|A0A0C4EKM7|A0A0C4EKM7_PUCT1;tr|A0A180GXH5|A0A180GXH5_PUCT1	tr|A0A0C4EKM7|A0A0C4EKM7_PUCT1 Uncharacterized protein OS=Puccinia triticina (isolate 1-1 / race 1 (BBBD)) PE=4 SV=1;tr|A0A180GXH5|A0A180GXH5_PUCT1 Uncharacterized protein OS=Puccinia triticina (isolate 1-1 / race 1 (BBBD)) GN=PTTG_01303 PE=4 SV=1	7	7	7	48.4	48.4	48.4	22.688	16.122	1924700000	28	2.1461	0.0131532	-3.31088	-1.53754	24.4357	23.9496	25.6608	24.5087	26.6783	26.006	26.7321	25.4422	24.0681	28.7925	29.19	29.1431	A0A0C4EKM7	599413465	XP_007414481.1	multi-copper oxidase laccase-like protein	Melampsora larici-populina 98AG31	Melampsora larici-populina 98AG31
	+	2.37602	-3.28034	tr|A0A180G1W2|A0A180G1W2_PUCT1;tr|A0A0C4EKU1|A0A0C4EKU1_PUCT1	tr|A0A180G1W2|A0A180G1W2_PUCT1;tr|A0A0C4EKU1|A0A0C4EKU1_PUCT1	tr|A0A180G1W2|A0A180G1W2_PUCT1 Dihydrolipoyl dehydrogenase OS=Puccinia triticina (isolate 1-1 / race 1 (BBBD)) GN=PTTG_01369 PE=3 SV=1;tr|A0A0C4EKU1|A0A0C4EKU1_PUCT1 Dihydrolipoyl dehydrogenase OS=Puccinia triticina (isolate 1-1 / race 1 (BBBD)) PE=3 SV=1	11	11	11	35.5	35.5	35.5	51.824	47.342	1782700000	33	3.15422	0.0105126	-3.29297	-1.78124	25.934	25.9335	25.6905	25.0304	26.1813	25.5326	24.754	25.1527	24.4549	28.7991	29.0781	28.7459	A0A180G1W2	1034731584	OAV86568.1	dihydrolipoyl dehydrogenase	Puccinia triticina 1-1 BBBD Race 1	Puccinia triticina 1-1 BBBD Race 1
	+	3.28513	-2.68718	tr|A0A180GHN1|A0A180GHN1_PUCT1;tr|A0A180GQ91|A0A180GQ91_PUCT1;tr|A0A0C4EKU4|A0A0C4EKU4_PUCT1;tr|A0A0C4EU24|A0A0C4EU24_PUCT1	tr|A0A180GHN1|A0A180GHN1_PUCT1;tr|A0A180GQ91|A0A180GQ91_PUCT1;tr|A0A0C4EKU4|A0A0C4EKU4_PUCT1;tr|A0A0C4EU24|A0A0C4EU24_PUCT1	tr|A0A180GHN1|A0A180GHN1_PUCT1 Peptidyl-prolyl cis-trans isomerase OS=Puccinia triticina (isolate 1-1 / race 1 (BBBD)) GN=PTTG_27668 PE=3 SV=1;tr|A0A180GQ91|A0A180GQ91_PUCT1 Peptidyl-prolyl cis-trans isomerase OS=Puccinia triticina (isolate 1-1 / race 1 (B	7	7	7	18.3	18.3	18.3	66.43	59.636	2348600000	26	2.16146	0.0103262	-4.03123	-1.76218	25.1907	26.2166	27.1029	24.2552	26.7213	24.479	24.6213	24.0441	24.7737	29.2162	29.1443	29.1886	A0A180GHN1	403166987	XP_003326815.2	peptidyl-prolyl cis-trans isomerase B (cyclophilin B)	Puccinia graminis f. sp. tritici CRL 75-36-700-3	Puccinia graminis f. sp. tritici CRL 75-36-700-3
	+	4.34456	-6.46472	tr|A0A0C4EKV3|A0A0C4EKV3_PUCT1;tr|A0A180FXY7|A0A180FXY7_PUCT1	tr|A0A0C4EKV3|A0A0C4EKV3_PUCT1;tr|A0A180FXY7|A0A180FXY7_PUCT1	tr|A0A0C4EKV3|A0A0C4EKV3_PUCT1 Uncharacterized protein OS=Puccinia triticina (isolate 1-1 / race 1 (BBBD)) PE=3 SV=1;tr|A0A180FXY7|A0A180FXY7_PUCT1 Uncharacterized protein (Fragment) OS=Puccinia triticina (isolate 1-1 / race 1 (BBBD)) GN=PTTG_30646 PE=4 SV	4	4	4	9.7	9.7	9.7	65.451	37.469	637620000	14	3.00723	0.0173696	-2.53657	-1.41445	24.9822	23.3143	24.1858	24.4385	24.8276	25.1896	26.6793	25.863	24.8242	27.0233	27.7066	27.3356	A0A0C4EKV3	403175893	XP_003334642.2	L-iditol 2-dehydrogenase	Puccinia graminis f. sp. tritici CRL 75-36-700-3	Puccinia graminis f. sp. tritici CRL 75-36-700-3
	+	3.3453	-6.42613	tr|A0A0C4EKV4|A0A0C4EKV4_PUCT1;tr|A0A180GHN9|A0A180GHN9_PUCT1;tr|A0A180GIJ7|A0A180GIJ7_PUCT1;tr|A0A180GHV6|A0A180GHV6_PUCT1	tr|A0A0C4EKV4|A0A0C4EKV4_PUCT1;tr|A0A180GHN9|A0A180GHN9_PUCT1;tr|A0A180GIJ7|A0A180GIJ7_PUCT1	tr|A0A0C4EKV4|A0A0C4EKV4_PUCT1 Uncharacterized protein OS=Puccinia triticina (isolate 1-1 / race 1 (BBBD)) PE=4 SV=1;tr|A0A180GHN9|A0A180GHN9_PUCT1 Uncharacterized protein OS=Puccinia triticina (isolate 1-1 / race 1 (BBBD)) GN=PTTG_27677 PE=4 SV=1;tr|A0A18	10	9	9	28.4	26.8	26.8	54.474	46.674	1649300000	21	2.37602	0.0130062	-3.28034	-1.59329	24.6021	25.1509	24.9682	24.4927	25.9036	25.3243	24.8347	25.5406	25.9686	28.0188	29.2666	28.2763	A0A0C4EKV4	1183454026	ORY78099.1	armadillo-type protein	Leucosporidium creatinivorum	Leucosporidium creatinivorum
	+	3.98809	-5.75785	tr|A0A0C4EKX2|A0A0C4EKX2_PUCT1	tr|A0A0C4EKX2|A0A0C4EKX2_PUCT1	tr|A0A0C4EKX2|A0A0C4EKX2_PUCT1 40S ribosomal protein S18 OS=Puccinia triticina (isolate 1-1 / race 1 (BBBD)) GN=PTTG_01401 PE=3 SV=1	6	6	6	28.1	28.1	28.1	24.085	15.344	1156500000	15	3.28513	0.01375	-2.68718	-1.52403	25.533	26.0859	25.1044	25.3313	25.7108	25.2936	25.2471	25.0863	24.6384	28.536	28.1107	27.7505	A0A0C4EKX2	403162357	XP_003322588.2	40S ribosomal protein S18	Puccinia striiformis;Puccinia coronata var. avenae f. sp. avenae;Puccinia graminis f. sp. tritici CRL 75-36-700-3;Puccinia triticina 1-1 BBBD Race 1	Puccinia striiformis;Puccinia coronata var. avenae f. sp. avenae;Puccinia graminis f. sp. tritici CRL 75-36-700-3;Puccinia triticina 1-1 BBBD Race 1
	+	2.88563	-4.08479	tr|A0A0C4EKX5|A0A0C4EKX5_PUCT1	tr|A0A0C4EKX5|A0A0C4EKX5_PUCT1	tr|A0A0C4EKX5|A0A0C4EKX5_PUCT1 60S ribosomal protein L10 OS=Puccinia triticina (isolate 1-1 / race 1 (BBBD)) GN=PTTG_01404 PE=4 SV=1	10	10	4	31.9	31.9	14.6	40.701	323.31	9703500000	90	4.34456	0	-6.46472	-3.51286	25.3249	24.8766	25.6149	24.6353	25.4412	24.4387	25.0619	25.2242	23.7325	31.1872	31.1263	31.596	A0A0C4EKX5	1034746009	OAV99992.1	60S ribosomal protein L10	Puccinia triticina 1-1 BBBD Race 1	Puccinia triticina 1-1 BBBD Race 1
	+	2.76964	-3.33124	tr|A0A0C4EL00|A0A0C4EL00_PUCT1	tr|A0A0C4EL00|A0A0C4EL00_PUCT1	tr|A0A0C4EL00|A0A0C4EL00_PUCT1 Uncharacterized protein OS=Puccinia triticina (isolate 1-1 / race 1 (BBBD)) GN=PTTG_01431 PE=4 SV=1	29	29	29	26.9	26.9	26.9	158.59	323.31	12247000000	145	3.3453	0.00105556	-6.42613	-3.04938	25.9452	25.5565	26.3936	24.1678	26.1963	25.0405	25.4224	25.0614	24.4841	31.8418	31.5303	31.3108	A0A0C4EL00	1216219593	SCV74694.1	BQ2448_7723	Microbotryum intermedium	Microbotryum intermedium
	+	4.20066	-5.32509	tr|A0A180G7E7|A0A180G7E7_PUCT1;tr|A0A0C4EL68|A0A0C4EL68_PUCT1	tr|A0A180G7E7|A0A180G7E7_PUCT1;tr|A0A0C4EL68|A0A0C4EL68_PUCT1	tr|A0A180G7E7|A0A180G7E7_PUCT1 Uncharacterized protein OS=Puccinia triticina (isolate 1-1 / race 1 (BBBD)) GN=PTTG_01502 PE=4 SV=1;tr|A0A0C4EL68|A0A0C4EL68_PUCT1 Uncharacterized protein OS=Puccinia triticina (isolate 1-1 / race 1 (BBBD)) PE=4 SV=1	8	8	8	50.3	50.3	50.3	17.825	39.245	4893500000	26	3.98809	0.00110145	-5.75785	-3.07413	23.4079	27.4964	25.4867	24.9774	24.3782	24.2225	25.6113	25.8954	24.3578	30.8709	29.9796	30.0011	A0A180G7E7	1240235410	PAV18866.1	conserved fungal	Pyrrhoderma noxium	Pyrrhoderma noxium
	+	2.15607	-3.62159	tr|A0A0C4ELC9|A0A0C4ELC9_PUCT1	tr|A0A0C4ELC9|A0A0C4ELC9_PUCT1	tr|A0A0C4ELC9|A0A0C4ELC9_PUCT1 Malate dehydrogenase OS=Puccinia triticina (isolate 1-1 / race 1 (BBBD)) GN=PTTG_01563 PE=3 SV=1	4	4	4	17.7	17.7	17.7	24.838	7.4183	1955300000	24	2.88563	0.0076895	-4.08479	-2.03396	25.16	25.5869	24.6162	25.5493	23.9566	25.0041	24.8081	25.0791	24.9489	29.2569	28.5652	28.9424	A0A0C4ELC9	1034746247	OAW00231.1	malate dehydrogenase, NAD-dependent	Puccinia triticina 1-1 BBBD Race 1	Puccinia triticina 1-1 BBBD Race 1
	+	1.33784	-3.13171	tr|A0A0C4ELH6|A0A0C4ELH6_PUCT1	tr|A0A0C4ELH6|A0A0C4ELH6_PUCT1	tr|A0A0C4ELH6|A0A0C4ELH6_PUCT1 Saccharopine dehydrogenase [NAD(+), L-lysine-forming] OS=Puccinia triticina (isolate 1-1 / race 1 (BBBD)) GN=PTTG_01610 PE=3 SV=1	9	9	9	33.5	33.5	33.5	29.242	22.812	1790000000	28	2.76964	0.0107945	-3.33124	-1.71292	26.151	25.9532	25.967	24.2612	25.6717	25.2413	25.8404	24.8601	25.4329	28.6872	28.3064	28.1743	A0A0C4ELH6	331237484	XP_003331399.1	ubiquitin thiolesterase	Puccinia graminis f. sp. tritici CRL 75-36-700-3	Puccinia graminis f. sp. tritici CRL 75-36-700-3
	+	4.92638	-6.16993	tr|A0A0C4ELI9|A0A0C4ELI9_PUCT1;tr|A0A0C4F8Q5|A0A0C4F8Q5_PUCT1;tr|A0A180G9T6|A0A180G9T6_PUCT1	tr|A0A0C4ELI9|A0A0C4ELI9_PUCT1	tr|A0A0C4ELI9|A0A0C4ELI9_PUCT1 Cell division cycle protein 48 OS=Puccinia triticina (isolate 1-1 / race 1 (BBBD)) GN=PTTG_01623 PE=3 SV=1	10	10	10	19.9	19.9	19.9	61.416	83.696	4435200000	42	4.20066	0.0024	-5.32509	-2.95056	24.9981	26.3358	24.1684	24.3527	24.7681	25.3827	25.388	24.3	24.6602	30.1281	30.2723	30.0784	A0A0C4ELI9	1034739438	OAV93471.1	cell division cycle protein 48	Puccinia triticina 1-1 BBBD Race 1	Puccinia triticina 1-1 BBBD Race 1
	+	2.8149	-2.84613	tr|A0A0C4ELL4|A0A0C4ELL4_PUCT1;tr|A0A180GMR4|A0A180GMR4_PUCT1	tr|A0A0C4ELL4|A0A0C4ELL4_PUCT1;tr|A0A180GMR4|A0A180GMR4_PUCT1	tr|A0A0C4ELL4|A0A0C4ELL4_PUCT1 Uncharacterized protein OS=Puccinia triticina (isolate 1-1 / race 1 (BBBD)) PE=3 SV=1;tr|A0A180GMR4|A0A180GMR4_PUCT1 Uncharacterized protein OS=Puccinia triticina (isolate 1-1 / race 1 (BBBD)) GN=PTTG_01648 PE=3 SV=1	9	6	6	39.7	30.9	30.9	36.968	142.63	1607400000	23	2.15607	0.0119871	-3.62159	-1.63867	25.4894	25.1983	24.719	25.4389	25.5111	23.8072	23.82	24.0543	26.7023	28.2623	29.405	27.9547	A0A0C4ELL4	331226946	XP_003326142.1	phosphoribosylamine-glycine ligase	Puccinia graminis f. sp. tritici CRL 75-36-700-3	Puccinia graminis f. sp. tritici CRL 75-36-700-3
	+	2.65013	-4.9206	tr|A0A180GMX7|A0A180GMX7_PUCT1;tr|A0A0C4ELL7|A0A0C4ELL7_PUCT1	tr|A0A180GMX7|A0A180GMX7_PUCT1;tr|A0A0C4ELL7|A0A0C4ELL7_PUCT1	tr|A0A180GMX7|A0A180GMX7_PUCT1 Uncharacterized protein OS=Puccinia triticina (isolate 1-1 / race 1 (BBBD)) GN=PTTG_01651 PE=4 SV=1;tr|A0A0C4ELL7|A0A0C4ELL7_PUCT1 Uncharacterized protein OS=Puccinia triticina (isolate 1-1 / race 1 (BBBD)) PE=4 SV=1	10	10	10	28.3	28.3	28.3	41.209	37.527	1554600000	24	1.33784	0.02949	-3.13171	-1.20679	23.8385	24.5313	25.9572	27.7013	24.5604	24.3671	26.2323	25.8401	25.0095	28.7729	28.9205	28.3306	A0A180GMX7	1034739799	OAV93827.1	hypothetical protein PTTG_01651	Puccinia triticina 1-1 BBBD Race 1	Puccinia triticina 1-1 BBBD Race 1
	+	2.75558	-3.78034	tr|A0A0C4ELN5|A0A0C4ELN5_PUCT1	tr|A0A0C4ELN5|A0A0C4ELN5_PUCT1	tr|A0A0C4ELN5|A0A0C4ELN5_PUCT1 Uncharacterized protein OS=Puccinia triticina (isolate 1-1 / race 1 (BBBD)) GN=PTTG_01669 PE=4 SV=1	28	21	20	43.6	33.7	32.3	90.185	323.31	12474000000	117	4.92638	0	-6.16993	-3.56267	25.2776	26.0222	25.0903	25.9653	25.4144	25.2059	24.6378	25.3867	24.1188	31.6308	31.7946	31.67	A0A0C4ELN5	1062135886	ODN82605.1	ran-specific GTPase-activating protein 1	Cryptococcus depauperatus CBS 7841	Cryptococcus depauperatus CBS 7841
	+	2.06907	-2.34113	tr|A0A0C4ELP7|A0A0C4ELP7_PUCT1;tr|A0A180GG93|A0A180GG93_PUCT1	tr|A0A0C4ELP7|A0A0C4ELP7_PUCT1;tr|A0A180GG93|A0A180GG93_PUCT1	tr|A0A0C4ELP7|A0A0C4ELP7_PUCT1 Uncharacterized protein OS=Puccinia triticina (isolate 1-1 / race 1 (BBBD)) PE=4 SV=1;tr|A0A180GG93|A0A180GG93_PUCT1 Pyruvate dehydrogenase E1 component subunit alpha OS=Puccinia triticina (isolate 1-1 / race 1 (BBBD)) GN=PTT	9	9	9	17.2	17.2	17.2	84.774	140.33	1742200000	34	2.8149	0.0136686	-2.84613	-1.52226	24.3437	25.7672	27.1563	26.2147	26.4867	25.2769	24.8367	24.2097	25.2087	28.8785	28.8964	28.7419	A0A0C4ELP7	331238071	XP_003331691.1	pyruvate dehydrogenase E1 component subunit alpha	Puccinia graminis f. sp. tritici CRL 75-36-700-3	Puccinia graminis f. sp. tritici CRL 75-36-700-3
	+	4.7869	-9.16306	tr|A0A0C4ELQ9|A0A0C4ELQ9_PUCT1;tr|A0A180H2K3|A0A180H2K3_PUCT1	tr|A0A0C4ELQ9|A0A0C4ELQ9_PUCT1;tr|A0A180H2K3|A0A180H2K3_PUCT1	tr|A0A0C4ELQ9|A0A0C4ELQ9_PUCT1 Uncharacterized protein OS=Puccinia triticina (isolate 1-1 / race 1 (BBBD)) PE=3 SV=1;tr|A0A180H2K3|A0A180H2K3_PUCT1 Heat shock protein SSB OS=Puccinia triticina (isolate 1-1 / race 1 (BBBD)) GN=PTTG_01696 PE=3 SV=1	7	7	7	37.4	37.4	37.4	21.313	234.18	4830600000	51	2.65013	0.0058836	-4.9206	-2.2297	25.0538	25.3798	25.1123	24.9891	26.7069	24.4226	25.0726	25.498	24.3256	30.2701	30.5941	30.0162	A0A0C4ELQ9	331222719	XP_003324033.1	heat shock protein SSB	Puccinia graminis f. sp. tritici CRL 75-36-700-3	Puccinia graminis f. sp. tritici CRL 75-36-700-3
	+	3.88463	-5.94443	tr|A0A0C4ELS5|A0A0C4ELS5_PUCT1	tr|A0A0C4ELS5|A0A0C4ELS5_PUCT1	tr|A0A0C4ELS5|A0A0C4ELS5_PUCT1 Uncharacterized protein OS=Puccinia triticina (isolate 1-1 / race 1 (BBBD)) GN=PTTG_01712 PE=4 SV=1	8	8	8	31	31	31	26.901	229.36	2583100000	27	2.75558	0.00950973	-3.78034	-1.88162	24.8472	25.0332	24.8744	26.5702	25.8001	24.8298	24.9083	24.5322	24.5122	29.648	29.5052	29.3879	A0A0C4ELS5	403171610	XP_003330811.2	20S proteasome subunit beta 6	Puccinia graminis f. sp. tritici CRL 75-36-700-3	Puccinia graminis f. sp. tritici CRL 75-36-700-3
	+	2.57151	-5.07043	tr|A0A0C4ELS7|A0A0C4ELS7_PUCT1	tr|A0A0C4ELS7|A0A0C4ELS7_PUCT1	tr|A0A0C4ELS7|A0A0C4ELS7_PUCT1 Peptidylprolyl isomerase OS=Puccinia triticina (isolate 1-1 / race 1 (BBBD)) GN=PTTG_01714 PE=4 SV=1	7	7	7	18.8	18.8	18.8	45.093	11.091	884470000	16	2.06907	0.03325	-2.34113	-1.17892	25.6021	25.6905	25.4884	26.3046	24.6256	25.378	24.3421	24.7401	25.1269	27.7558	27.7669	27.8089	A0A0C4ELS7	1034743494	OAV97489.1	FK506-binding protein 1	Puccinia triticina 1-1 BBBD Race 1	Puccinia triticina 1-1 BBBD Race 1
	+	4.36057	-3.4804	tr|A0A0C4ELW0|A0A0C4ELW0_PUCT1	tr|A0A0C4ELW0|A0A0C4ELW0_PUCT1	tr|A0A0C4ELW0|A0A0C4ELW0_PUCT1 Eukaryotic translation initiation factor 3 subunit B OS=Puccinia triticina (isolate 1-1 / race 1 (BBBD)) GN=PRT1 PE=3 SV=1	38	36	36	66.5	64.7	64.7	69.374	323.31	50118000000	348	4.7869	0	-9.16306	-4.89159	23.5105	25.1381	24.1185	24.0471	25.1495	24.1746	26.7956	25.2325	25.7918	33.7545	33.7545	33.3513	A0A0C4ELW0	403171926	XP_003331107.2	translation initiation factor eIF-3 subunit 9	Puccinia graminis f. sp. tritici CRL 75-36-700-3	Puccinia graminis f. sp. tritici CRL 75-36-700-3
	+	4.77766	-4.10676	tr|A0A0C4ELW2|A0A0C4ELW2_PUCT1	tr|A0A0C4ELW2|A0A0C4ELW2_PUCT1	tr|A0A0C4ELW2|A0A0C4ELW2_PUCT1 Aspartate aminotransferase OS=Puccinia triticina (isolate 1-1 / race 1 (BBBD)) PE=4 SV=1	10	10	10	54.1	54.1	54.1	31.44	323.31	6336100000	68	3.88463	0.00115152	-5.94443	-3.11376	26.2253	26.2306	24.8453	25.3796	24.6825	24.0922	24.7857	24.8206	23.341	30.9076	30.7442	30.3359	A0A0C4ELW2	1034733550	OAV87809.1	aspartate aminotransferase, mitochondrial	Puccinia triticina 1-1 BBBD Race 1	Puccinia triticina 1-1 BBBD Race 1
	+	4.58979	-6.5456	tr|A0A180G7X6|A0A180G7X6_PUCT1;tr|A0A0C4ELX0|A0A0C4ELX0_PUCT1	tr|A0A180G7X6|A0A180G7X6_PUCT1;tr|A0A0C4ELX0|A0A0C4ELX0_PUCT1	tr|A0A180G7X6|A0A180G7X6_PUCT1 40S ribosomal protein S0 OS=Puccinia triticina (isolate 1-1 / race 1 (BBBD)) GN=RPS0 PE=3 SV=1;tr|A0A0C4ELX0|A0A0C4ELX0_PUCT1 40S ribosomal protein S0 OS=Puccinia triticina (isolate 1-1 / race 1 (BBBD)) GN=RPS0 PE=3 SV=1	4	4	4	41	41	41	12.874	35.482	6628900000	32	2.57151	0.00597849	-5.07043	-2.23904	25.4901	24.6576	25.2499	26.9857	25.422	24.4808	24.726	25.5237	22.5906	30.8021	31.0295	30.2683	A0A180G7X6	909610346	KNF00604.1	40S ribosomal protein S0	Puccinia striiformis f. sp. tritici PST-78	Puccinia striiformis f. sp. tritici PST-78
	+	2.51999	-4.1106	tr|A0A180H246|A0A180H246_PUCT1;tr|A0A0C4EM19|A0A0C4EM19_PUCT1	tr|A0A180H246|A0A180H246_PUCT1;tr|A0A0C4EM19|A0A0C4EM19_PUCT1	tr|A0A180H246|A0A180H246_PUCT1 Argininosuccinate lyase OS=Puccinia triticina (isolate 1-1 / race 1 (BBBD)) GN=PTTG_01808 PE=3 SV=1;tr|A0A0C4EM19|A0A0C4EM19_PUCT1 Uncharacterized protein OS=Puccinia triticina (isolate 1-1 / race 1 (BBBD)) PE=3 SV=1	11	11	1	23.1	23.1	2.6	83.422	97.515	1499100000	30	4.36057	0.0079061	-3.4804	-2.0698	25.6114	25.2341	25.9274	24.696	25.1284	25.229	25.8705	25.9412	24.9831	28.6475	28.3797	28.4674	A0A180H246	1034744574	OAV98562.1	argininosuccinate lyase	Puccinia triticina 1-1 BBBD Race 1	Puccinia triticina 1-1 BBBD Race 1
	+	3.27952	-3.83618	tr|A0A180H2I0|A0A180H2I0_PUCT1;tr|A0A0C4EM24|A0A0C4EM24_PUCT1	tr|A0A180H2I0|A0A180H2I0_PUCT1;tr|A0A0C4EM24|A0A0C4EM24_PUCT1	tr|A0A180H2I0|A0A180H2I0_PUCT1 Proteasome subunit beta type OS=Puccinia triticina (isolate 1-1 / race 1 (BBBD)) GN=PTTG_01813 PE=3 SV=1;tr|A0A0C4EM24|A0A0C4EM24_PUCT1 Proteasome subunit beta type OS=Puccinia triticina (isolate 1-1 / race 1 (BBBD)) PE=3 SV=	13	12	1	39	37	2.9	44.853	98.107	2507200000	32	4.77766	0.00435862	-4.10676	-2.46183	25.8945	26.3272	25.8889	25.2043	25.2538	24.9188	25.8953	24.6901	24.4884	28.9947	29.2525	29.45	A0A180H2I0	403163180	XP_003890266.1	20S proteasome subunit beta 4	Puccinia graminis f. sp. tritici CRL 75-36-700-3;Puccinia triticina 1-1 BBBD Race 1	Puccinia graminis f. sp. tritici CRL 75-36-700-3;Puccinia triticina 1-1 BBBD Race 1
	+	3.29453	-4.83165	tr|A0A180H194|A0A180H194_PUCT1;tr|A0A0C4EM38|A0A0C4EM38_PUCT1	tr|A0A180H194|A0A180H194_PUCT1;tr|A0A0C4EM38|A0A0C4EM38_PUCT1	tr|A0A180H194|A0A180H194_PUCT1 Uncharacterized protein OS=Puccinia triticina (isolate 1-1 / race 1 (BBBD)) GN=PTTG_01827 PE=4 SV=1;tr|A0A0C4EM38|A0A0C4EM38_PUCT1 Uncharacterized protein OS=Puccinia triticina (isolate 1-1 / race 1 (BBBD)) PE=4 SV=1	8	8	8	31.1	31.1	31.1	31.695	270.56	13218000000	79	4.58979	0	-6.5456	-3.63875	25.2046	25.103	26.3074	24.6598	25.3525	25.3426	24.9236	25.9439	25.404	31.5228	32.0432	31.4258	A0A180H194	353237093	CCA69074.1	probable proteine disulfate isomerase	Serendipita indica DSM 11827	Serendipita indica DSM 11827
	+	2.37422	-4.36949	tr|A0A0C4EM44|A0A0C4EM44_PUCT1	tr|A0A0C4EM44|A0A0C4EM44_PUCT1	tr|A0A0C4EM44|A0A0C4EM44_PUCT1 Malate dehydrogenase OS=Puccinia triticina (isolate 1-1 / race 1 (BBBD)) GN=PTTG_01833 PE=3 SV=1	11	11	11	41.5	41.5	41.5	52.252	205	2194500000	34	2.51999	0.00842449	-4.1106	-1.92089	25.6228	24.8089	25.4542	24.2642	24.4462	26.2233	24.6766	25.1055	25.8096	29.2028	29.2488	28.8138	A0A0C4EM44	1034744536	OAV98524.1	malate dehydrogenase, NAD-dependent	Puccinia triticina 1-1 BBBD Race 1	Puccinia triticina 1-1 BBBD Race 1
	+	3.41767	-4.18638	tr|A0A0C4EM51|A0A0C4EM51_PUCT1	tr|A0A0C4EM51|A0A0C4EM51_PUCT1	tr|A0A0C4EM51|A0A0C4EM51_PUCT1 ATP synthase subunit beta OS=Puccinia triticina (isolate 1-1 / race 1 (BBBD)) GN=PTTG_01840 PE=3 SV=1	5	5	5	34.5	34.5	34.5	21.839	41.764	1555100000	21	3.27952	0.0077963	-3.83618	-2.04378	24.4745	26.2071	25.0828	24.2893	25.5141	24.5188	24.2604	24.2109	24.7612	28.6681	28.5854	28.5772	A0A0C4EM51	1034744526	OAV98514.1	ATP synthase subunit beta, mitochondrial	Puccinia triticina 1-1 BBBD Race 1	Puccinia triticina 1-1 BBBD Race 1
	+	5.07939	-7.352	tr|A0A0C4EM80|A0A0C4EM80_PUCT1	tr|A0A0C4EM80|A0A0C4EM80_PUCT1	tr|A0A0C4EM80|A0A0C4EM80_PUCT1 Nucleoside diphosphate kinase OS=Puccinia triticina (isolate 1-1 / race 1 (BBBD)) GN=PTTG_01869 PE=3 SV=1	17	17	17	41.1	41.1	41.1	58.415	146.98	4781600000	83	3.29453	0.00429932	-4.83165	-2.45184	26.3571	26.2783	24.3513	24.8902	26.3598	25.1594	25.4127	24.7613	26.6367	30.5458	30.2655	30.0929	A0A0C4EM80	1034735150	OAV89267.1	nucleoside diphosphate kinase	Puccinia triticina 1-1 BBBD Race 1	Puccinia triticina 1-1 BBBD Race 1
	+	2.41936	-3.43949	tr|A0A0C4EMK9|A0A0C4EMK9_PUCT1;tr|A0A180GG04|A0A180GG04_PUCT1	tr|A0A0C4EMK9|A0A0C4EMK9_PUCT1;tr|A0A180GG04|A0A180GG04_PUCT1	tr|A0A0C4EMK9|A0A0C4EMK9_PUCT1 Uncharacterized protein OS=Puccinia triticina (isolate 1-1 / race 1 (BBBD)) PE=4 SV=1;tr|A0A180GG04|A0A180GG04_PUCT1 60S ribosomal protein L21-A OS=Puccinia triticina (isolate 1-1 / race 1 (BBBD)) GN=PTTG_01999 PE=4 SV=1	14	12	12	56.6	53	53	34.963	283.81	5029500000	57	2.37422	0.00815063	-4.36949	-1.9461	25.7512	24.7505	24.9449	27.0522	25.537	24.7797	23.6037	24.7884	26.6368	30.4486	30.5286	29.5002	A0A0C4EMK9	1034736819	OAV90893.1	60S ribosomal protein L21-A	Puccinia triticina 1-1 BBBD Race 1	Puccinia triticina 1-1 BBBD Race 1
	+	2.24114	-3.32293	tr|A0A0C4EML0|A0A0C4EML0_PUCT1	tr|A0A0C4EML0|A0A0C4EML0_PUCT1	tr|A0A0C4EML0|A0A0C4EML0_PUCT1 40S ribosomal protein S9-B OS=Puccinia triticina (isolate 1-1 / race 1 (BBBD)) GN=PTTG_02000 PE=4 SV=1	17	16	16	51.3	49.1	49.1	58.362	162.79	6100700000	69	3.41767	0.00585263	-4.18638	-2.22789	24.0499	26.1924	25.2846	26.8971	26.2344	25.6733	23.8139	25.9253	24.2953	30.7205	30.3748	30.2686	A0A0C4EML0	1034736820	OAV90894.1	40S ribosomal protein S9-B	Puccinia triticina 1-1 BBBD Race 1	Puccinia triticina 1-1 BBBD Race 1
	+	2.68946	-3.39913	tr|A0A0C4EML3|A0A0C4EML3_PUCT1;tr|A0A180GDZ0|A0A180GDZ0_PUCT1	tr|A0A0C4EML3|A0A0C4EML3_PUCT1;tr|A0A180GDZ0|A0A180GDZ0_PUCT1	tr|A0A0C4EML3|A0A0C4EML3_PUCT1 Uncharacterized protein OS=Puccinia triticina (isolate 1-1 / race 1 (BBBD)) PE=4 SV=1;tr|A0A180GDZ0|A0A180GDZ0_PUCT1 Uncharacterized protein OS=Puccinia triticina (isolate 1-1 / race 1 (BBBD)) GN=PTTG_02003 PE=4 SV=1	7	7	7	46.4	46.4	46.4	16.569	236.55	32537000000	134	5.07939	0	-7.352	-4.19429	26.5556	25.7882	25.791	25.7137	25.2532	25.5895	27.0666	25.6106	24.74	33.2779	32.7706	32.5637	A0A0C4EML3	955494741	XP_014657677.1	DUF89-domain-containing protein	Moesziomyces antarcticus	Moesziomyces antarcticus
	+	4.9951	-6.62889	tr|A0A0C4EMV0|A0A0C4EMV0_PUCT1	tr|A0A0C4EMV0|A0A0C4EMV0_PUCT1	tr|A0A0C4EMV0|A0A0C4EMV0_PUCT1 Uncharacterized protein OS=Puccinia triticina (isolate 1-1 / race 1 (BBBD)) GN=PTTG_02090 PE=3 SV=1	4	4	4	33.1	33.1	33.1	17.132	21.864	2225100000	19	2.41936	0.0109565	-3.43949	-1.66142	24.7147	25.3436	25.772	26.0069	25.0031	25.4845	24.3978	25.7431	25.6279	29.6734	28.0064	29.1332	A0A0C4EMV0	1358969399	PRQ70192.1	protein phosphatase 2A inhibitor 2	Rhodotorula toruloides	Rhodotorula toruloides
	+	3.51904	-6.46791	tr|A0A0C4EMW3|A0A0C4EMW3_PUCT1	tr|A0A0C4EMW3|A0A0C4EMW3_PUCT1	tr|A0A0C4EMW3|A0A0C4EMW3_PUCT1 GTP-binding nuclear protein OS=Puccinia triticina (isolate 1-1 / race 1 (BBBD)) GN=PTTG_02103 PE=3 SV=1	9	9	9	41.1	41.1	41.1	22.265	27.787	2420100000	25	2.24114	0.0134356	-3.32293	-1.56981	25.2052	25.5408	25.0283	26.2084	25.9113	24.8398	25.9978	25.8422	25.2341	29.8645	28.7085	28.3555	A0A0C4EMW3	1034742074	OAV96078.1	GTP-binding nuclear protein spi1	Puccinia triticina 1-1 BBBD Race 1	Puccinia triticina 1-1 BBBD Race 1
	+	4.88351	-3.84809	tr|A0A180GTF4|A0A180GTF4_PUCT1;tr|A0A0C4EMW9|A0A0C4EMW9_PUCT1;tr|A0A180GTF5|A0A180GTF5_PUCT1	tr|A0A180GTF4|A0A180GTF4_PUCT1;tr|A0A0C4EMW9|A0A0C4EMW9_PUCT1;tr|A0A180GTF5|A0A180GTF5_PUCT1	tr|A0A180GTF4|A0A180GTF4_PUCT1 Lactoylglutathione lyase, variant OS=Puccinia triticina (isolate 1-1 / race 1 (BBBD)) GN=PTTG_02109 PE=4 SV=1;tr|A0A0C4EMW9|A0A0C4EMW9_PUCT1 Uncharacterized protein OS=Puccinia triticina (isolate 1-1 / race 1 (BBBD)) PE=4 SV=	4	4	4	12.5	12.5	12.5	49.532	12.51	672700000	14	2.68946	0.010869	-3.39913	-1.71965	25.1742	26.3495	24.3654	23.4877	24.8347	23.7637	24.9679	25.8159	25.1335	27.8004	27.5084	26.9748	A0A180GTF4	1034742083	OAV96087.1	lactoylglutathione lyase, variant	Puccinia triticina 1-1 BBBD Race 1	Puccinia triticina 1-1 BBBD Race 1
	+	4.5575	-2.96675	tr|A0A180GUS1|A0A180GUS1_PUCT1;tr|A0A0C4EN10|A0A0C4EN10_PUCT1	tr|A0A180GUS1|A0A180GUS1_PUCT1;tr|A0A0C4EN10|A0A0C4EN10_PUCT1	tr|A0A180GUS1|A0A180GUS1_PUCT1 Asparaginyl-tRNA synthetase OS=Puccinia triticina (isolate 1-1 / race 1 (BBBD)) GN=PTTG_02150 PE=4 SV=1;tr|A0A0C4EN10|A0A0C4EN10_PUCT1 Uncharacterized protein OS=Puccinia triticina (isolate 1-1 / race 1 (BBBD)) PE=4 SV=1	9	9	9	32.8	32.8	32.8	34.039	225.32	12953000000	78	4.9951	0	-6.62889	-3.81109	24.9544	24.4383	26.8222	25.5605	24.8229	24.9179	25.2361	25.0121	25.7193	31.7357	31.6219	31.8304	A0A180GUS1	1034742125	OAV96129.1	asparaginyl-tRNA synthetase	Puccinia triticina 1-1 BBBD Race 1	Puccinia triticina 1-1 BBBD Race 1
	+	2.62822	-4.9295	tr|A0A0C4EN28|A0A0C4EN28_PUCT1	tr|A0A0C4EN28|A0A0C4EN28_PUCT1	tr|A0A0C4EN28|A0A0C4EN28_PUCT1 Phosphoglucomutase OS=Puccinia triticina (isolate 1-1 / race 1 (BBBD)) GN=PTTG_02168 PE=3 SV=1	10	10	6	40.7	40.7	31	24.155	24.485	64784000000	90	3.51904	0.00120635	-6.46791	-3.15255	32.0664	31.9099	25.1828	26.4749	26.1557	24.6843	25.6121	24.9843	32.0083	32.2178	32.2702	32.2307	A0A0C4EN28	1034736739	OAV90814.1	phosphoglucomutase	Puccinia triticina 1-1 BBBD Race 1	Puccinia triticina 1-1 BBBD Race 1
	+	3.60301	-3.11927	tr|A0A0C4EN78|A0A0C4EN78_PUCT1	tr|A0A0C4EN78|A0A0C4EN78_PUCT1	tr|A0A0C4EN78|A0A0C4EN78_PUCT1 Mannose-6-phosphate isomerase OS=Puccinia triticina (isolate 1-1 / race 1 (BBBD)) GN=PTTG_02219 PE=3 SV=1	4	4	4	29.3	29.3	29.3	18.039	48.776	1765700000	15	4.88351	0.0053012	-3.84809	-2.3347	26.0218	25.3531	24.6705	24.7517	24.9083	25.0457	24.3617	27.4518	24.8626	28.6109	28.6471	28.992	A0A0C4EN78	1034738341	OAV92388.1	phosphomannose isomerase type I	Puccinia triticina 1-1 BBBD Race 1	Puccinia triticina 1-1 BBBD Race 1
	+	2.60824	-3.8053	tr|A0A0C4EN92|A0A0C4EN92_PUCT1	tr|A0A0C4EN92|A0A0C4EN92_PUCT1	tr|A0A0C4EN92|A0A0C4EN92_PUCT1 20S proteasome subunit beta 2 OS=Puccinia triticina (isolate 1-1 / race 1 (BBBD)) GN=PTTG_02233 PE=4 SV=1	11	11	11	28.8	28.8	28.8	59.798	89.47	1184500000	31	4.5575	0.0105113	-2.96675	-1.81119	25.9897	25.3543	26.3955	25.3237	25.2681	25.1223	26.3553	26.2547	25.8346	28.3691	28.2842	27.9611	A0A0C4EN92	1034738327	OAV92374.1	20S proteasome subunit beta 2	Puccinia triticina 1-1 BBBD Race 1	Puccinia triticina 1-1 BBBD Race 1
	+	5.08236	-4.61592	tr|A0A0C4END7|A0A0C4END7_PUCT1;tr|A0A0C4F159|A0A0C4F159_PUCT1	tr|A0A0C4END7|A0A0C4END7_PUCT1	tr|A0A0C4END7|A0A0C4END7_PUCT1 Carbamoyl-phosphate synthase arginine-specific large chain OS=Puccinia triticina (isolate 1-1 / race 1 (BBBD)) GN=PTTG_02278 PE=4 SV=1	20	20	20	55.4	55.4	55.4	60.694	194.02	4742300000	69	2.62822	0.00579167	-4.9295	-2.22276	25.7669	25.9373	24.6556	24.9948	26.703	24.3121	24.7758	24.8642	23.9518	30.125	30.4539	30.2195	A0A0C4END7	1034742046	OAV96050.1	carbamoyl-phosphate synthase arginine-specific large chain	Puccinia triticina 1-1 BBBD Race 1	Puccinia triticina 1-1 BBBD Race 1
	+	3.62347	-5.58272	tr|A0A0C4ENM5|A0A0C4ENM5_PUCT1	tr|A0A0C4ENM5|A0A0C4ENM5_PUCT1	tr|A0A0C4ENM5|A0A0C4ENM5_PUCT1 Uncharacterized protein OS=Puccinia triticina (isolate 1-1 / race 1 (BBBD)) GN=PTTG_02372 PE=4 SV=1	7	7	7	23.6	23.6	23.6	48.009	63.105	1383300000	25	3.60301	0.0104748	-3.11927	-1.77918	26.9533	24.7887	25.85	24.9092	25.2531	25.6356	24.2524	24.7012	25.1929	28.1585	28.6461	28.3511	A0A0C4ENM5	599396565	XP_007411584.1	secreted protein	Melampsora larici-populina 98AG31	Melampsora larici-populina 98AG31
	+	2.71922	-4.44373	tr|A0A0C4ENQ1|A0A0C4ENQ1_PUCT1	tr|A0A0C4ENQ1|A0A0C4ENQ1_PUCT1	tr|A0A0C4ENQ1|A0A0C4ENQ1_PUCT1 Uncharacterized protein OS=Puccinia triticina (isolate 1-1 / race 1 (BBBD)) GN=PTTG_02398 PE=4 SV=1	6	5	5	17.7	14.3	14.3	31.013	5.9897	1386500000	15	2.60824	0.0098	-3.8053	-1.84641	26.4573	25.0797	25.2833	24.2368	25.7167	24.0562	24.5715	26.3513	26.2409	28.7777	28.5368	28.1112	A0A0C4ENQ1	1216227252	SCV67269.1	BQ2448_5915	Microbotryum intermedium	Microbotryum intermedium
	+	3.15051	-4.59161	tr|A0A0C4ENR2|A0A0C4ENR2_PUCT1	tr|A0A0C4ENR2|A0A0C4ENR2_PUCT1	tr|A0A0C4ENR2|A0A0C4ENR2_PUCT1 60S ribosomal protein L4-A OS=Puccinia triticina (isolate 1-1 / race 1 (BBBD)) GN=PTTG_02409 PE=4 SV=1	26	26	25	33.9	33.9	33.2	130.13	223.91	2989700000	65	5.08236	0.00283333	-4.61592	-2.78322	25.7604	25.5965	25.92	24.8558	24.6809	25.1282	25.1234	25.0733	25.7513	29.6842	29.3985	29.4299	A0A0C4ENR2	1034745066	OAV99052.1	60S ribosomal protein L4-A	Puccinia triticina 1-1 BBBD Race 1	Puccinia triticina 1-1 BBBD Race 1
	+	3.39925	-4.29361	tr|A0A0C4ENT2|A0A0C4ENT2_PUCT1	tr|A0A0C4ENT2|A0A0C4ENT2_PUCT1	tr|A0A0C4ENT2|A0A0C4ENT2_PUCT1 Uncharacterized protein OS=Puccinia triticina (isolate 1-1 / race 1 (BBBD)) GN=PTTG_02429 PE=4 SV=1	3	3	3	14.3	14.3	14.3	25.98	42.133	8099500000	36	3.62347	0.00225882	-5.58272	-2.86623	25.0731	24.9181	26.0784	25.709	25.8944	24.5692	25.1018	24.7881	26.0663	30.6573	31.2387	31.0247	A0A0C4ENT2	1488147788	RKP13852.1	ubiquitin-related domain-containing protein	Piptocephalis cylindrospora	Piptocephalis cylindrospora
	+	4.46802	-3.4053	tr|A0A0C4EP22|A0A0C4EP22_PUCT1;tr|A0A0C4EP14|A0A0C4EP14_PUCT1;tr|A0A180GK63|A0A180GK63_PUCT1	tr|A0A0C4EP22|A0A0C4EP22_PUCT1;tr|A0A0C4EP14|A0A0C4EP14_PUCT1;tr|A0A180GK63|A0A180GK63_PUCT1	tr|A0A0C4EP22|A0A0C4EP22_PUCT1 Uncharacterized protein OS=Puccinia triticina (isolate 1-1 / race 1 (BBBD)) GN=PTTG_02520 PE=3 SV=1;tr|A0A0C4EP14|A0A0C4EP14_PUCT1 Uncharacterized protein OS=Puccinia triticina (isolate 1-1 / race 1 (BBBD)) PE=3 SV=1;tr|A0A18	3	3	3	26.4	26.4	26.4	14.882	59.405	4046300000	28	2.71922	0.00709179	-4.44373	-2.10418	26.8987	25.0799	26.2182	25.6644	26.3474	24.4972	25.4434	25.7961	24.9649	30.4737	29.8817	29.4847	A0A0C4EP22	31087950	AAP42830.1	alcohol dehydrogenase	Puccinia triticina	Puccinia triticina
	+	2.58969	-2.75147	tr|A0A180GJV9|A0A180GJV9_PUCT1;tr|A0A0C4EP28|A0A0C4EP28_PUCT1;REV__A0A1D5SJ46	tr|A0A180GJV9|A0A180GJV9_PUCT1;tr|A0A0C4EP28|A0A0C4EP28_PUCT1	tr|A0A180GJV9|A0A180GJV9_PUCT1 Eukaryotic translation initiation factor 3 subunit A OS=Puccinia triticina (isolate 1-1 / race 1 (BBBD)) GN=TIF32 PE=3 SV=1;tr|A0A0C4EP28|A0A0C4EP28_PUCT1 Eukaryotic translation initiation factor 3 subunit A OS=Puccinia triti	11	11	11	34.7	34.7	34.7	41.238	92.452	5526200000	68	3.15051	0.0051462	-4.59161	-2.3105	23.9401	27.1666	25.6852	25.2661	26.7017	25.6154	25.0988	25.0111	24.6301	30.6703	30.0028	30.6849	A0A180GJV9	913836365	KNZ44915.1	eukaryotic translation initiation factor 3 subunit A	Puccinia sorghi	Puccinia sorghi
	+	3.04546	-6.3687	tr|A0A0C4EP78|A0A0C4EP78_PUCT1	tr|A0A0C4EP78|A0A0C4EP78_PUCT1	tr|A0A0C4EP78|A0A0C4EP78_PUCT1 Aconitate hydratase, mitochondrial OS=Puccinia triticina (isolate 1-1 / race 1 (BBBD)) GN=PTTG_02579 PE=3 SV=1	5	5	5	51.4	51.4	51.4	12.214	126.29	3613600000	22	3.39925	0.00553333	-4.29361	-2.2681	24.6928	25.8417	25.5626	26.1355	24.8653	25.7809	25.2273	24.6813	26.4774	30.0678	29.7001	29.8947	A0A0C4EP78	1034737898	OAV91952.1	aconitate hydratase, mitochondrial	Puccinia triticina 1-1 BBBD Race 1	Puccinia triticina 1-1 BBBD Race 1
	+	1.10464	-3.04497	tr|A0A0C4EPF1|A0A0C4EPF1_PUCT1;tr|A0A180GIU8|A0A180GIU8_PUCT1	tr|A0A0C4EPF1|A0A0C4EPF1_PUCT1;tr|A0A180GIU8|A0A180GIU8_PUCT1	tr|A0A0C4EPF1|A0A0C4EPF1_PUCT1 Uncharacterized protein OS=Puccinia triticina (isolate 1-1 / race 1 (BBBD)) PE=3 SV=1;tr|A0A180GIU8|A0A180GIU8_PUCT1 Uncharacterized protein OS=Puccinia triticina (isolate 1-1 / race 1 (BBBD)) GN=PTTG_02652 PE=3 SV=1	7	6	6	22.9	21.1	21.1	43.121	53.31	1143600000	31	4.46802	0.00776037	-3.4053	-2.04295	24.4219	25.3343	23.6734	24.6466	24.8869	24.7999	25.8353	26.3661	24.7799	28.299	27.883	28.3673	A0A0C4EPF1	#N/A	#N/A	#N/A	#N/A	#N/A
	+	2.64302	-3.48007	tr|A0A0C4EPP1|A0A0C4EPP1_PUCT1;tr|A0A180GWK4|A0A180GWK4_PUCT1	tr|A0A0C4EPP1|A0A0C4EPP1_PUCT1;tr|A0A180GWK4|A0A180GWK4_PUCT1	tr|A0A0C4EPP1|A0A0C4EPP1_PUCT1 Uncharacterized protein OS=Puccinia triticina (isolate 1-1 / race 1 (BBBD)) PE=3 SV=1;tr|A0A180GWK4|A0A180GWK4_PUCT1 Uncharacterized protein OS=Puccinia triticina (isolate 1-1 / race 1 (BBBD)) GN=PTTG_02744 PE=3 SV=1	17	17	17	25.3	25.3	25.3	123.77	62.165	6469000000	34	2.58969	0.017116	-2.75147	-1.44037	24.7516	24.6698	25.7597	26.4965	25.4158	25.4061	25.1941	23.9192	24.3603	28.7938	28.6294	28.1496	A0A0C4EPP1	403174367	XP_003333348.2	carbamoyl-phosphate synthase small subunit	Puccinia graminis f. sp. tritici CRL 75-36-700-3	Puccinia graminis f. sp. tritici CRL 75-36-700-3
	+	3.82205	-6.82856	tr|A0A0C4EPP6|A0A0C4EPP6_PUCT1	tr|A0A0C4EPP6|A0A0C4EPP6_PUCT1	tr|A0A0C4EPP6|A0A0C4EPP6_PUCT1 Uncharacterized protein OS=Puccinia triticina (isolate 1-1 / race 1 (BBBD)) GN=PTTG_02749 PE=4 SV=1	28	28	28	35.7	35.7	35.7	85.149	323.31	11287000000	126	3.04546	0.00231325	-6.3687	-2.86912	25.6535	25.9634	24.995	24.8843	26.4453	23.9946	25.6402	25.1341	24.0927	31.3802	31.6143	31.4357	A0A0C4EPP6	599400632	XP_007412275.1	family 18 glycoside hydrolase	Melampsora larici-populina 98AG31	Melampsora larici-populina 98AG31
	+	4.44241	-4.96476	tr|A0A0C4EPU2|A0A0C4EPU2_PUCT1;tr|A0A180GM35|A0A180GM35_PUCT1	tr|A0A0C4EPU2|A0A0C4EPU2_PUCT1;tr|A0A180GM35|A0A180GM35_PUCT1	tr|A0A0C4EPU2|A0A0C4EPU2_PUCT1 Uncharacterized protein OS=Puccinia triticina (isolate 1-1 / race 1 (BBBD)) PE=4 SV=1;tr|A0A180GM35|A0A180GM35_PUCT1 Uncharacterized protein OS=Puccinia triticina (isolate 1-1 / race 1 (BBBD)) GN=PTTG_02795 PE=4 SV=1	3	3	3	22	22	22	13.705	9.6471	1268700000	23	1.10464	0.0475451	-3.04497	-1.08897	25.258	26.4333	25.151	24.5386	24.551	24.3209	25.7913	24.7354	24.6151	28.8906	28.7259	24.9288	A0A0C4EPU2	1034738935	OAV92973.1	hypothetical protein PTTG_02795	Puccinia triticina 1-1 BBBD Race 1	Puccinia triticina 1-1 BBBD Race 1
	+	3.35423	-4.63044	tr|A0A0C4EQ66|A0A0C4EQ66_PUCT1;tr|A0A0C4F5V2|A0A0C4F5V2_PUCT1;tr|A0A180GR14|A0A180GR14_PUCT1;tr|A0A180G9H1|A0A180G9H1_PUCT1	tr|A0A0C4EQ66|A0A0C4EQ66_PUCT1;tr|A0A0C4F5V2|A0A0C4F5V2_PUCT1	tr|A0A0C4EQ66|A0A0C4EQ66_PUCT1 2-methylcitrate dehydratase OS=Puccinia triticina (isolate 1-1 / race 1 (BBBD)) GN=PTTG_08507 PE=4 SV=1;tr|A0A0C4F5V2|A0A0C4F5V2_PUCT1 Uncharacterized protein OS=Puccinia triticina (isolate 1-1 / race 1 (BBBD)) PE=4 SV=1	17	16	16	10.2	9.8	9.8	255.78	36.356	1126500000	31	2.64302	0.0106526	-3.48007	-1.73821	23.9292	26.0657	26.6297	24.6876	24.467	24.3768	24.6478	24.722	25.0136	28.5914	27.0119	28.3683	A0A0C4EQ66	1034742697	OAV96697.1	2-methylcitrate dehydratase	Puccinia triticina 1-1 BBBD Race 1	Puccinia triticina 1-1 BBBD Race 1
	+	2.98239	-2.5231	tr|A0A180GP71|A0A180GP71_PUCT1;tr|A0A0C4EQF9|A0A0C4EQF9_PUCT1	tr|A0A180GP71|A0A180GP71_PUCT1;tr|A0A0C4EQF9|A0A0C4EQF9_PUCT1	tr|A0A180GP71|A0A180GP71_PUCT1 Uncharacterized protein OS=Puccinia triticina (isolate 1-1 / race 1 (BBBD)) GN=PTTG_03018 PE=4 SV=1;tr|A0A0C4EQF9|A0A0C4EQF9_PUCT1 Uncharacterized protein OS=Puccinia triticina (isolate 1-1 / race 1 (BBBD)) PE=4 SV=1	9	9	9	22.3	22.3	22.3	58.634	313.57	13700000000	75	3.82205	0	-6.82856	-3.43584	23.9399	25.3906	25.3109	24.1223	25.7818	24.9937	25.4238	24.1873	25.3085	31.8367	31.923	31.6238	A0A180GP71	983146446	KWU44414.1	Tudor/PWWP/MBT	Rhodotorula sp. JG-1b	Rhodotorula sp. JG-1b
	+	1.88319	-3.84695	tr|A0A0C4EQV1|A0A0C4EQV1_PUCT1;C1K5C0	tr|A0A0C4EQV1|A0A0C4EQV1_PUCT1	tr|A0A0C4EQV1|A0A0C4EQV1_PUCT1 Glutathione peroxidase OS=Puccinia triticina (isolate 1-1 / race 1 (BBBD)) GN=PTTG_03162 PE=3 SV=1	4	4	4	16.5	16.5	16.5	26.19	22.713	3236100000	35	4.44241	0.0021573	-4.96476	-2.84202	25.0667	24.786	24.6337	24.9507	24.1453	24.3905	26.0682	26.6265	24.0044	29.3314	29.5268	29.5226	A0A0C4EQV1	403164814	XP_003324887.2	glutathione peroxidase	Puccinia graminis f. sp. tritici CRL 75-36-700-3	Puccinia graminis f. sp. tritici CRL 75-36-700-3
	+	4.72563	-5.43451	tr|A0A0C4EQX0|A0A0C4EQX0_PUCT1	tr|A0A0C4EQX0|A0A0C4EQX0_PUCT1	tr|A0A0C4EQX0|A0A0C4EQX0_PUCT1 S-methyl-5-thioadenosine phosphorylase OS=Puccinia triticina (isolate 1-1 / race 1 (BBBD)) GN=PTTG_03181 PE=3 SV=1	15	15	15	32.4	32.4	32.4	61.214	95.513	3150500000	37	3.35423	0.00478481	-4.63044	-2.39259	24.1166	24.9147	25.8789	25.1527	25.7553	24.2578	24.4294	24.985	24.5538	29.7169	29.6759	29.6642	A0A0C4EQX0	331224400	XP_003324872.1	5'-methylthioadenosine phosphorylase	Puccinia graminis f. sp. tritici CRL 75-36-700-3	Puccinia graminis f. sp. tritici CRL 75-36-700-3
	+	4.21307	-5.926	tr|A0A180GC38|A0A180GC38_PUCT1;tr|A0A0C4ER72|A0A0C4ER72_PUCT1	tr|A0A180GC38|A0A180GC38_PUCT1;tr|A0A0C4ER72|A0A0C4ER72_PUCT1	tr|A0A180GC38|A0A180GC38_PUCT1 60S acidic ribosomal protein P0 OS=Puccinia triticina (isolate 1-1 / race 1 (BBBD)) GN=PTTG_03284 PE=3 SV=1;tr|A0A0C4ER72|A0A0C4ER72_PUCT1 60S acidic ribosomal protein P0 OS=Puccinia triticina (isolate 1-1 / race 1 (BBBD)) PE	4	4	4	13.2	13.2	13.2	59.889	23.436	955880000	18	2.98239	0.0184946	-2.5231	-1.40472	25.0135	25.9141	25.3265	25.669	24.8301	25.6832	24.5343	25.1554	24.0742	27.9429	28.0592	27.7494	A0A180GC38	1034736008	OAV90099.1	large subunit ribosomal protein LP0	Puccinia triticina 1-1 BBBD Race 1	Puccinia triticina 1-1 BBBD Race 1
	+	2.94226	-3.52855	tr|A0A0C4ERD6|A0A0C4ERD6_PUCT1	tr|A0A0C4ERD6|A0A0C4ERD6_PUCT1	tr|A0A0C4ERD6|A0A0C4ERD6_PUCT1 Large subunit ribosomal protein L7Ae OS=Puccinia triticina (isolate 1-1 / race 1 (BBBD)) GN=PTTG_03354 PE=4 SV=1	6	6	6	37	37	37	20.588	49.702	2193100000	17	1.88319	0.0125643	-3.84695	-1.60043	26.5047	25.5255	24.4836	25.5038	26.7453	23.6423	25.6968	25.9536	24.1512	29.1877	29.2189	29.0256	A0A0C4ERD6	1034735660	OAV89760.1	large subunit ribosomal protein L7Ae	Puccinia triticina 1-1 BBBD Race 1	Puccinia triticina 1-1 BBBD Race 1
	+	5.16691	-5.94846	tr|A0A0C4ERK3|A0A0C4ERK3_PUCT1	tr|A0A0C4ERK3|A0A0C4ERK3_PUCT1	tr|A0A0C4ERK3|A0A0C4ERK3_PUCT1 6-phosphogluconate dehydrogenase, decarboxylating OS=Puccinia triticina (isolate 1-1 / race 1 (BBBD)) GN=PTTG_03422 PE=3 SV=1	13	13	13	60.9	60.9	60.9	32.75	240.18	6007700000	84	4.72563	0.0011875	-5.43451	-3.14251	25.1725	24.2076	25.4961	24.7222	25.4867	25.0527	24.2473	24.7857	24.3357	30.596	30.5663	30.4029	A0A0C4ERK3	1034742180	OAV96183.1	6-phosphogluconate dehydrogenase	Puccinia triticina 1-1 BBBD Race 1	Puccinia triticina 1-1 BBBD Race 1
	+	2.98803	-8.15508	tr|A0A0C4ERQ8|A0A0C4ERQ8_PUCT1	tr|A0A0C4ERQ8|A0A0C4ERQ8_PUCT1	tr|A0A0C4ERQ8|A0A0C4ERQ8_PUCT1 Heat shock protein HSS1 OS=Puccinia triticina (isolate 1-1 / race 1 (BBBD)) GN=PTTG_03478 PE=3 SV=1	9	9	9	43.7	43.7	43.7	33.282	211.41	8064500000	56	4.21307	0	-5.926	-3.22639	24.8247	23.9977	25.7816	25.0511	24.8257	25.517	25.5634	26.4363	25.8189	31.3745	31.2733	30.5239	A0A0C4ERQ8	1034742273	OAV96276.1	heat shock protein HSS1	Puccinia triticina 1-1 BBBD Race 1	Puccinia triticina 1-1 BBBD Race 1
	+	4.18071	-2.00503	tr|A0A0C4ERS1|A0A0C4ERS1_PUCT1;tr|A0A180GIF2|A0A180GIF2_PUCT1	tr|A0A0C4ERS1|A0A0C4ERS1_PUCT1;tr|A0A180GIF2|A0A180GIF2_PUCT1	tr|A0A0C4ERS1|A0A0C4ERS1_PUCT1 Uncharacterized protein OS=Puccinia triticina (isolate 1-1 / race 1 (BBBD)) PE=4 SV=1;tr|A0A180GIF2|A0A180GIF2_PUCT1 NAD(P)H:quinone oxidoreductase, type IV OS=Puccinia triticina (isolate 1-1 / race 1 (BBBD)) GN=PTTG_03491 PE	6	6	6	23	23	23	30.023	40.816	3217000000	30	2.94226	0.0101985	-3.52855	-1.83367	25.4765	25.4157	24.2616	25.7245	26.658	25.9687	25.3294	26.5464	24.9847	29.9113	30.0156	29.01	A0A0C4ERS1	1034738481	OAV92526.1	NAD(P)H:quinone oxidoreductase, type IV	Puccinia triticina 1-1 BBBD Race 1	Puccinia triticina 1-1 BBBD Race 1
	+	4.45847	-6.95942	tr|A0A0C4ERS9|A0A0C4ERS9_PUCT1;tr|A0A180GVL7|A0A180GVL7_PUCT1;tr|A0A0C4F9W0|A0A0C4F9W0_PUCT1;tr|A0A180FZ47|A0A180FZ47_PUCT1	tr|A0A0C4ERS9|A0A0C4ERS9_PUCT1;tr|A0A180GVL7|A0A180GVL7_PUCT1	tr|A0A0C4ERS9|A0A0C4ERS9_PUCT1 Uncharacterized protein OS=Puccinia triticina (isolate 1-1 / race 1 (BBBD)) PE=3 SV=1;tr|A0A180GVL7|A0A180GVL7_PUCT1 Uncharacterized protein OS=Puccinia triticina (isolate 1-1 / race 1 (BBBD)) GN=PTTG_03499 PE=3 SV=1	20	20	3	40.4	40.4	4.3	68.734	323.31	11627000000	157	5.16691	0	-5.94846	-3.51046	26.446	25.8202	26.056	25.7235	25.5489	25.3358	23.7919	23.9768	24.9857	31.8024	31.3234	31.3279	A0A0C4ERS9	331212225	XP_003307382.1	elongation factor EF-1 beta subunit	Puccinia graminis f. sp. tritici CRL 75-36-700-3	Puccinia graminis f. sp. tritici CRL 75-36-700-3
	+	3.9702	-6.53995	tr|A0A0C4ERU7|A0A0C4ERU7_PUCT1;tr|A0A180GVP8|A0A180GVP8_PUCT1;tr|A0A0C4EWJ4|A0A0C4EWJ4_PUCT1;tr|A0A180GPS3|A0A180GPS3_PUCT1	tr|A0A0C4ERU7|A0A0C4ERU7_PUCT1;tr|A0A180GVP8|A0A180GVP8_PUCT1;tr|A0A0C4EWJ4|A0A0C4EWJ4_PUCT1;tr|A0A180GPS3|A0A180GPS3_PUCT1	tr|A0A0C4ERU7|A0A0C4ERU7_PUCT1 Uncharacterized protein OS=Puccinia triticina (isolate 1-1 / race 1 (BBBD)) PE=4 SV=1;tr|A0A180GVP8|A0A180GVP8_PUCT1 Fructose-bisphosphate aldolase, class II OS=Puccinia triticina (isolate 1-1 / race 1 (BBBD)) GN=PTTG_03517 P	37	29	29	69.5	56.4	56.4	70.902	323.31	49652000000	293	2.98803	0	-8.15508	-3.32321	24.6895	26.4653	25.9698	23.5983	26.8223	25.6594	25.6275	27.2576	25.9819	33.4174	33.8035	33.3244	A0A0C4ERU7	331215087	XP_003320224.1	fructose-bisphosphate aldolase, class II	Puccinia graminis f. sp. tritici CRL 75-36-700-3	Puccinia graminis f. sp. tritici CRL 75-36-700-3
	+	3.57458	-3.40573	tr|A0A0C4ERV1|A0A0C4ERV1_PUCT1	tr|A0A0C4ERV1|A0A0C4ERV1_PUCT1	tr|A0A0C4ERV1|A0A0C4ERV1_PUCT1 40S ribosomal protein S1 OS=Puccinia triticina (isolate 1-1 / race 1 (BBBD)) GN=RPS1 PE=3 SV=1	4	4	4	28.4	28.4	28.4	21.451	14.034	611360000	12	4.18071	0.0261885	-2.00503	-1.24066	25.77	25.9725	26.1349	25.2254	25.3691	25.2488	25.666	23.4445	25.1639	27.4994	27.1985	27.1604	A0A0C4ERV1	1034742835	OAV96834.1	40S ribosomal protein S1	Puccinia triticina 1-1 BBBD Race 1	Puccinia triticina 1-1 BBBD Race 1
	+	2.98017	-5.50635	tr|A0A0C4ERV4|A0A0C4ERV4_PUCT1;tr|A0A180GWD3|A0A180GWD3_PUCT1	tr|A0A0C4ERV4|A0A0C4ERV4_PUCT1;tr|A0A180GWD3|A0A180GWD3_PUCT1	tr|A0A0C4ERV4|A0A0C4ERV4_PUCT1 Uncharacterized protein OS=Puccinia triticina (isolate 1-1 / race 1 (BBBD)) PE=4 SV=1;tr|A0A180GWD3|A0A180GWD3_PUCT1 Uncharacterized protein OS=Puccinia triticina (isolate 1-1 / race 1 (BBBD)) GN=PTTG_03524 PE=4 SV=1	8	8	8	43.7	43.7	43.7	23.91	323.31	13566000000	100	4.45847	0	-6.95942	-3.77635	22.4	26.348	25.7975	24.164	25.2312	25.1023	25.3896	24.3258	26.2146	31.8245	31.8878	31.6634	A0A0C4ERV4	1022854142	XP_016271904.1	Rho GDP-dissociation inhibitor	Rhodotorula toruloides;Rhodotorula toruloides NP11	Rhodotorula toruloides;Rhodotorula toruloides NP11
	+	3.83913	-3.84956	tr|A0A0C4ERW8|A0A0C4ERW8_PUCT1	tr|A0A0C4ERW8|A0A0C4ERW8_PUCT1	tr|A0A0C4ERW8|A0A0C4ERW8_PUCT1 Proteasome subunit alpha type OS=Puccinia triticina (isolate 1-1 / race 1 (BBBD)) GN=PTTG_03538 PE=3 SV=1	13	13	13	47.4	47.4	47.4	35.997	278.13	21108000000	113	3.9702	0	-6.53995	-3.39188	25.4291	25.2557	25.1258	26.0307	26.5307	25.08	26.0338	25.2564	25.0611	32.489	32.3292	32.4431	A0A0C4ERW8	1034742814	OAV96813.1	proteasome subunit alpha type-5	Puccinia triticina 1-1 BBBD Race 1	Puccinia triticina 1-1 BBBD Race 1
	+	4.75637	-5.09936	tr|A0A0C4ERX5|A0A0C4ERX5_PUCT1	tr|A0A0C4ERX5|A0A0C4ERX5_PUCT1	tr|A0A0C4ERX5|A0A0C4ERX5_PUCT1 Uncharacterized protein OS=Puccinia triticina (isolate 1-1 / race 1 (BBBD)) GN=PTTG_03545 PE=4 SV=1	6	6	6	24.9	24.9	24.9	29.435	33.324	1688000000	25	3.57458	0.00828916	-3.40573	-1.91213	26.043	26.0508	24.6826	25.1584	24.974	25.6192	25.8229	24.3919	25.5286	29.0654	28.4178	28.4857	A0A0C4ERX5	1216222388	SCV72162.1	BQ2448_4856	Microbotryum intermedium	Microbotryum intermedium
	+	3.07865	-5.2221	tr|A0A0C4ERX9|A0A0C4ERX9_PUCT1	tr|A0A0C4ERX9|A0A0C4ERX9_PUCT1	tr|A0A0C4ERX9|A0A0C4ERX9_PUCT1 Uncharacterized protein OS=Puccinia triticina (isolate 1-1 / race 1 (BBBD)) GN=PTTG_03549 PE=4 SV=1	7	7	7	42.1	42.1	42.1	22.133	95.909	5677700000	32	2.98017	0.00422951	-5.50635	-2.56445	25.7781	25.2112	25.928	25.4728	25.6772	23.6839	25.6843	24.1804	26.0984	30.2985	30.7183	30.3361	A0A0C4ERX9	599428038	XP_007418383.1	family 4 carbohydrate esterase	Melampsora larici-populina 98AG31	Melampsora larici-populina 98AG31
	+	3.07423	-3.05122	tr|A0A180GTK3|A0A180GTK3_PUCT1;tr|A0A0C4ES74|A0A0C4ES74_PUCT1	tr|A0A180GTK3|A0A180GTK3_PUCT1;tr|A0A0C4ES74|A0A0C4ES74_PUCT1	tr|A0A180GTK3|A0A180GTK3_PUCT1 Uncharacterized protein OS=Puccinia triticina (isolate 1-1 / race 1 (BBBD)) GN=PTTG_03648 PE=4 SV=1;tr|A0A0C4ES74|A0A0C4ES74_PUCT1 Uncharacterized protein OS=Puccinia triticina (isolate 1-1 / race 1 (BBBD)) PE=4 SV=1	9	7	7	43.5	35.1	35.1	28.635	75.157	2162000000	31	3.83913	0.00697487	-3.84956	-2.17236	25.5688	24.5447	26.1228	24.681	25.5067	25.4154	24.5846	24.1747	23.8941	29.0831	29.1621	28.9066	A0A180GTK3	599396609	XP_007411589.1	carboxylesterase	Melampsora larici-populina 98AG31	Melampsora larici-populina 98AG31
	+	4.2307	-7.67369	tr|A0A0C4ES78|A0A0C4ES78_PUCT1	tr|A0A0C4ES78|A0A0C4ES78_PUCT1	tr|A0A0C4ES78|A0A0C4ES78_PUCT1 Uncharacterized protein OS=Puccinia triticina (isolate 1-1 / race 1 (BBBD)) GN=PTTG_03652 PE=4 SV=1	10	10	10	33.5	33.5	33.5	37.84	323.31	6081000000	44	4.75637	0.000974359	-5.09936	-2.97963	24.8209	24.9934	25.2911	25.2103	25.3066	25.4682	24.0443	26.0388	26.491	30.4225	30.7725	30.0882	A0A0C4ES78	983149650	KWU47603.1	Ribokinase-like protein	Rhodotorula sp. JG-1b	Rhodotorula sp. JG-1b
	+	2.85408	-3.94199	tr|A0A0C4ES93|A0A0C4ES93_PUCT1;tr|A0A180GNQ7|A0A180GNQ7_PUCT1	tr|A0A0C4ES93|A0A0C4ES93_PUCT1;tr|A0A180GNQ7|A0A180GNQ7_PUCT1	tr|A0A0C4ES93|A0A0C4ES93_PUCT1 Uncharacterized protein OS=Puccinia triticina (isolate 1-1 / race 1 (BBBD)) PE=4 SV=1;tr|A0A180GNQ7|A0A180GNQ7_PUCT1 UV excision repair protein Rad23 OS=Puccinia triticina (isolate 1-1 / race 1 (BBBD)) GN=PTTG_03667 PE=4 SV=1	8	8	8	26.2	26.2	26.2	36.184	43.415	5903600000	56	3.07865	0.00464706	-5.2221	-2.5124	25.6459	24.4147	24.2291	25.6817	24.3039	25.3393	25.6499	25.2272	24.6802	29.5404	30.5789	30.8718	A0A0C4ES93	1034739542	OAV93573.1	UV excision repair protein Rad23	Puccinia triticina 1-1 BBBD Race 1	Puccinia triticina 1-1 BBBD Race 1
	+	1.53023	-2.4777	tr|A0A180GP31|A0A180GP31_PUCT1;tr|A0A0C4ESK4|A0A0C4ESK4_PUCT1	tr|A0A180GP31|A0A180GP31_PUCT1;tr|A0A0C4ESK4|A0A0C4ESK4_PUCT1	tr|A0A180GP31|A0A180GP31_PUCT1 Uncharacterized protein OS=Puccinia triticina (isolate 1-1 / race 1 (BBBD)) GN=PTTG_03783 PE=4 SV=1;tr|A0A0C4ESK4|A0A0C4ESK4_PUCT1 Uncharacterized protein OS=Puccinia triticina (isolate 1-1 / race 1 (BBBD)) PE=4 SV=1	9	9	9	21.8	21.8	21.8	64.784	87.443	1306700000	36	3.07423	0.0113067	-3.05122	-1.65924	25.2301	24.5783	25.5257	24.7435	25.8694	25.4182	24.7509	25.9815	26.1486	28.2188	28.5015	28.4644	A0A180GP31	1022850530	XP_016272658.1	26S proteasome regulatory subunit	Rhodotorula toruloides;Rhodotorula toruloides NP11	Rhodotorula toruloides;Rhodotorula toruloides NP11
	+	2.09611	-2.59173	tr|A0A0C4ESM9|A0A0C4ESM9_PUCT1	tr|A0A0C4ESM9|A0A0C4ESM9_PUCT1	tr|A0A0C4ESM9|A0A0C4ESM9_PUCT1 Uncharacterized protein OS=Puccinia triticina (isolate 1-1 / race 1 (BBBD)) GN=PTTG_03808 PE=3 SV=1	16	16	16	63.2	63.2	63.2	38.006	323.31	21954000000	215	4.2307	0	-7.67369	-3.97274	25.8998	25.1554	24.4206	24.3516	25.3735	24.1848	25.3576	25.2305	25.5376	32.4362	32.6116	31.8831	A0A0C4ESM9	331226000	XP_003325670.1	protein phosphatase	Puccinia graminis f. sp. tritici CRL 75-36-700-3	Puccinia graminis f. sp. tritici CRL 75-36-700-3
	+	3.30351	-3.57284	tr|A0A180GPK0|A0A180GPK0_PUCT1;tr|A0A0C4ESN6|A0A0C4ESN6_PUCT1	tr|A0A180GPK0|A0A180GPK0_PUCT1;tr|A0A0C4ESN6|A0A0C4ESN6_PUCT1	tr|A0A180GPK0|A0A180GPK0_PUCT1 Uncharacterized protein OS=Puccinia triticina (isolate 1-1 / race 1 (BBBD)) GN=PTTG_03815 PE=3 SV=1;tr|A0A0C4ESN6|A0A0C4ESN6_PUCT1 Uncharacterized protein OS=Puccinia triticina (isolate 1-1 / race 1 (BBBD)) PE=3 SV=1	9	9	9	24.4	24.4	24.4	41.841	91.004	3595600000	38	2.85408	0.00825424	-3.94199	-1.97101	25.2555	25.0949	25.0859	25.2044	26.7892	25.763	23.9715	24.7085	23.9627	29.5851	30.215	29.7825	A0A180GPK0	403174925	XP_003333826.2	60S acidic ribosomal protein P1	Puccinia graminis f. sp. tritici CRL 75-36-700-3	Puccinia graminis f. sp. tritici CRL 75-36-700-3
	+	3.84618	-4.10261	tr|A0A0C4ESR3|A0A0C4ESR3_PUCT1;tr|A0A180GRY9|A0A180GRY9_PUCT1;tr|A0A180GSN0|A0A180GSN0_PUCT1;tr|A0A0C4F1I0|A0A0C4F1I0_PUCT1;tr|A0A0C4ER24|A0A0C4ER24_PUCT1;tr|A0A180G1W9|A0A180G1W9_PUCT1;tr|A0A180G2Y5|A0A180G2Y5_PUCT1;tr|A0A0C4EWH8|A0A0C4EWH8_PUCT1;tr|A0A180G5V7|A0A180G5V7_PUCT1;tr|A0A180G1R2|A0A180G1R2_PUCT1	tr|A0A0C4ESR3|A0A0C4ESR3_PUCT1;tr|A0A180GRY9|A0A180GRY9_PUCT1;tr|A0A180GSN0|A0A180GSN0_PUCT1;tr|A0A0C4F1I0|A0A0C4F1I0_PUCT1	tr|A0A0C4ESR3|A0A0C4ESR3_PUCT1 Uncharacterized protein OS=Puccinia triticina (isolate 1-1 / race 1 (BBBD)) PE=4 SV=1;tr|A0A180GRY9|A0A180GRY9_PUCT1 Uncharacterized protein OS=Puccinia triticina (isolate 1-1 / race 1 (BBBD)) GN=PTTG_03842 PE=4 SV=1;tr|A0A18	14	14	14	22.1	22.1	22.1	113.77	52.721	1245100000	34	1.53023	0.0453226	-2.4777	-1.10254	25.7689	25.2345	26.4612	26.4432	25.1546	25.0672	26.1429	24.9958	25.1934	28.8787	28.3479	26.8716	A0A0C4ESR3	403173614	XP_003332669.2	acetyl-CoA carboxylase/biotin carboxylase	Puccinia graminis f. sp. tritici CRL 75-36-700-3	Puccinia graminis f. sp. tritici CRL 75-36-700-3
	+	2.30605	-2.19886	tr|A0A0C4EST8|A0A0C4EST8_PUCT1;tr|A0A180GQL9|A0A180GQL9_PUCT1	tr|A0A0C4EST8|A0A0C4EST8_PUCT1;tr|A0A180GQL9|A0A180GQL9_PUCT1	tr|A0A0C4EST8|A0A0C4EST8_PUCT1 Uncharacterized protein OS=Puccinia triticina (isolate 1-1 / race 1 (BBBD)) PE=4 SV=1;tr|A0A180GQL9|A0A180GQL9_PUCT1 Uncharacterized protein OS=Puccinia triticina (isolate 1-1 / race 1 (BBBD)) GN=PTTG_03867 PE=4 SV=1	4	4	4	11.6	11.6	11.6	54.316	26.599	855910000	9	2.09611	0.023445	-2.59173	-1.27773	24.9655	24.9392	25.8998	25.3495	24.8957	24.9857	26.0742	24.4516	24.5715	28.688	27.1833	27.1349	A0A0C4EST8	599352838	XP_007403579.1	family 5 glycoside hydrolase	Melampsora larici-populina 98AG31	Melampsora larici-populina 98AG31
	+	3.59556	-5.61525	tr|A0A0C4ET28|A0A0C4ET28_PUCT1	tr|A0A0C4ET28|A0A0C4ET28_PUCT1	tr|A0A0C4ET28|A0A0C4ET28_PUCT1 Uncharacterized protein OS=Puccinia triticina (isolate 1-1 / race 1 (BBBD)) PE=4 SV=1	3	3	3	70.4	70.4	70.4	10.931	155.29	2284300000	21	3.30351	0.0086	-3.57284	-1.93528	25.7879	24.7386	24.6481	25.4699	25.053	26.2055	25.6063	25.6152	24.5247	28.999	29.1785	29.2693	A0A0C4ET28	1034736361	OAV90444.1	hypothetical protein PTTG_28324	Puccinia triticina 1-1 BBBD Race 1	Puccinia triticina 1-1 BBBD Race 1
	+	1.88605	-3.3347	tr|A0A0C4ETI7|A0A0C4ETI7_PUCT1;tr|A0A180GCA1|A0A180GCA1_PUCT1;tr|A0A0C4ETI6|A0A0C4ETI6_PUCT1	tr|A0A0C4ETI7|A0A0C4ETI7_PUCT1;tr|A0A180GCA1|A0A180GCA1_PUCT1;tr|A0A0C4ETI6|A0A0C4ETI6_PUCT1	tr|A0A0C4ETI7|A0A0C4ETI7_PUCT1 Uncharacterized protein OS=Puccinia triticina (isolate 1-1 / race 1 (BBBD)) PE=3 SV=1;tr|A0A180GCA1|A0A180GCA1_PUCT1 Uncharacterized protein OS=Puccinia triticina (isolate 1-1 / race 1 (BBBD)) GN=PTTG_04116 PE=3 SV=1;tr|A0A0C	32	32	32	21.9	21.9	21.9	235.44	133.05	3896100000	62	3.84618	0.005	-4.10261	-2.29356	24.4661	25.5137	24.8673	25.9143	25.9583	25.4464	23.7653	23.6914	25.2706	30.3489	29.6799	29.5981	A0A0C4ETI7	1173940176	OQR89677.1	glutathione S-transferase	Achlya hypogyna	Achlya hypogyna
	+	2.77664	-4.52823	tr|A0A0C4ETM9|A0A0C4ETM9_PUCT1	tr|A0A0C4ETM9|A0A0C4ETM9_PUCT1	tr|A0A0C4ETM9|A0A0C4ETM9_PUCT1 Uncharacterized protein OS=Puccinia triticina (isolate 1-1 / race 1 (BBBD)) GN=PTTG_04158 PE=4 SV=1	8	8	8	22.1	22.1	22.1	54.612	15.036	705400000	16	2.30605	0.0334947	-2.19886	-1.16245	26.356	24.7785	25.0858	24.5092	25.556	25.7207	26.2381	24.7239	24.55	27.2715	27.5196	27.5913	A0A0C4ETM9	1012303527	AMS24303.1	CSEP-32, partial	Phakopsora pachyrhizi	Phakopsora pachyrhizi
	+	3.68012	-4.08179	tr|A0A0C4EUC9|A0A0C4EUC9_PUCT1	tr|A0A0C4EUC9|A0A0C4EUC9_PUCT1	tr|A0A0C4EUC9|A0A0C4EUC9_PUCT1 Hydroxyacylglutathione hydrolase OS=Puccinia triticina (isolate 1-1 / race 1 (BBBD)) GN=PTTG_04408 PE=3 SV=1	5	5	2	38.6	38.6	16.2	28.276	210.74	4607600000	53	3.59556	0.00228571	-5.61525	-2.86812	26.4069	27.4963	24.9459	23.9971	24.2845	25.3067	25.8368	24.2706	24.9526	30.3152	30.4244	29.6944	A0A0C4EUC9	1034739888	OAV93915.1	hydroxyacylglutathione hydrolase	Puccinia triticina 1-1 BBBD Race 1	Puccinia triticina 1-1 BBBD Race 1
	+	5.37539	-4.53399	tr|A0A0C4EUH4|A0A0C4EUH4_PUCT1	tr|A0A0C4EUH4|A0A0C4EUH4_PUCT1	tr|A0A0C4EUH4|A0A0C4EUH4_PUCT1 Uncharacterized protein OS=Puccinia triticina (isolate 1-1 / race 1 (BBBD)) GN=PTTG_04453 PE=4 SV=1	6	6	6	31.8	31.8	31.8	22.553	28.545	1634400000	28	1.88605	0.0152901	-3.3347	-1.4614	25.9918	26.7164	25.756	23.9265	25.8323	26.408	24.0715	24.9926	24.7285	29.0626	28.8007	28.3076	A0A0C4EUH4	599105869	XP_007382709.1	RNA-binding domain-containing protein	Punctularia strigosozonata HHB-11173 SS5	Punctularia strigosozonata HHB-11173 SS5
	+	3.82721	-4.68772	tr|A0A0C4EUQ7|A0A0C4EUQ7_PUCT1	tr|A0A0C4EUQ7|A0A0C4EUQ7_PUCT1	tr|A0A0C4EUQ7|A0A0C4EUQ7_PUCT1 40S ribosomal protein S22 OS=Puccinia triticina (isolate 1-1 / race 1 (BBBD)) GN=PTTG_04538 PE=3 SV=1	3	3	3	39.5	39.5	39.5	15.972	85.384	5521600000	34	2.77664	0.00726733	-4.52823	-2.15423	25.2422	26.5784	26.8358	24.8724	26.7862	26.2936	24.7277	26.0209	24.8813	30.1477	30.7029	30.6862	A0A0C4EUQ7	331231000	XP_003328164.1	40S ribosomal protein S22	Puccinia striiformis;Puccinia coronata var. avenae f. sp. avenae;Puccinia graminis f. sp. tritici CRL 75-36-700-3;Puccinia triticina 1-1 BBBD Race 1	Puccinia striiformis;Puccinia coronata var. avenae f. sp. avenae;Puccinia graminis f. sp. tritici CRL 75-36-700-3;Puccinia triticina 1-1 BBBD Race 1
	+	2.40677	-3.3978	tr|A0A0C4EUT5|A0A0C4EUT5_PUCT1;tr|A0A180H2W6|A0A180H2W6_PUCT1	tr|A0A0C4EUT5|A0A0C4EUT5_PUCT1;tr|A0A180H2W6|A0A180H2W6_PUCT1	tr|A0A0C4EUT5|A0A0C4EUT5_PUCT1 Uncharacterized protein OS=Puccinia triticina (isolate 1-1 / race 1 (BBBD)) PE=4 SV=1;tr|A0A180H2W6|A0A180H2W6_PUCT1 Uncharacterized protein OS=Puccinia triticina (isolate 1-1 / race 1 (BBBD)) GN=PTTG_04566 PE=4 SV=1	7	7	7	27.5	27.5	27.5	35.194	90.493	2404800000	33	3.68012	0.00547253	-4.08179	-2.24687	24.2664	26.0562	26.4915	25.6617	24.6425	25.3139	25.2715	25.8296	25.8382	29.1932	29.4954	29.1748	A0A0C4EUT5	331241671	XP_003333483.1	UDP-N-acetylglucosamine pyrophosphorylase	Puccinia graminis f. sp. tritici CRL 75-36-700-3	Puccinia graminis f. sp. tritici CRL 75-36-700-3
	+	4.79466	-2.36057	tr|A0A180GTG9|A0A180GTG9_PUCT1;tr|A0A0C4EVH5|A0A0C4EVH5_PUCT1	tr|A0A180GTG9|A0A180GTG9_PUCT1;tr|A0A0C4EVH5|A0A0C4EVH5_PUCT1	tr|A0A180GTG9|A0A180GTG9_PUCT1 Methylenetetrahydrofolate reductase OS=Puccinia triticina (isolate 1-1 / race 1 (BBBD)) GN=PTTG_04810 PE=3 SV=1;tr|A0A0C4EVH5|A0A0C4EVH5_PUCT1 Methylenetetrahydrofolate reductase OS=Puccinia triticina (isolate 1-1 / race 1 (B	5	5	5	24.2	24.2	24.2	21.607	27.697	3222700000	27	5.37539	0.00280412	-4.53399	-2.77915	25.5124	26.5319	26.6723	25.2802	25.0262	25.0401	24.916	26.0686	26.7338	29.4711	29.8256	29.6517	A0A180GTG9	331216383	XP_003320871.1	methylenetetrahydrofolate reductase (NADPH)	Puccinia graminis f. sp. tritici CRL 75-36-700-3	Puccinia graminis f. sp. tritici CRL 75-36-700-3
	+	4.91881	-5.43426	tr|A0A180GTJ8|A0A180GTJ8_PUCT1;tr|A0A0C4EVJ6|A0A0C4EVJ6_PUCT1	tr|A0A180GTJ8|A0A180GTJ8_PUCT1;tr|A0A0C4EVJ6|A0A0C4EVJ6_PUCT1	tr|A0A180GTJ8|A0A180GTJ8_PUCT1 Small subunit ribosomal protein S14e OS=Puccinia triticina (isolate 1-1 / race 1 (BBBD)) GN=PTTG_04831 PE=3 SV=1;tr|A0A0C4EVJ6|A0A0C4EVJ6_PUCT1 Uncharacterized protein OS=Puccinia triticina (isolate 1-1 / race 1 (BBBD)) PE=3	6	6	6	55.8	55.8	55.8	14.817	188.61	5633500000	55	3.82721	0.00416129	-4.68772	-2.55654	24.0199	24.609	25.4188	25.582	26.2816	25.2905	25.1832	24.5512	25.3174	30.5476	30.5786	30.0912	A0A180GTJ8	1034741701	OAV95709.1	small subunit ribosomal protein S14e	Puccinia triticina 1-1 BBBD Race 1	Puccinia triticina 1-1 BBBD Race 1
	+	2.08418	-2.35211	tr|A0A180GU09|A0A180GU09_PUCT1;tr|A0A0C4EVQ6|A0A0C4EVQ6_PUCT1	tr|A0A180GU09|A0A180GU09_PUCT1;tr|A0A0C4EVQ6|A0A0C4EVQ6_PUCT1	tr|A0A180GU09|A0A180GU09_PUCT1 Uncharacterized protein OS=Puccinia triticina (isolate 1-1 / race 1 (BBBD)) GN=PTTG_04892 PE=4 SV=1;tr|A0A0C4EVQ6|A0A0C4EVQ6_PUCT1 Uncharacterized protein OS=Puccinia triticina (isolate 1-1 / race 1 (BBBD)) PE=4 SV=1	11	11	11	27.7	27.7	27.7	54.831	67.982	1331600000	32	2.40677	0.0120651	-3.3978	-1.64322	24.8864	24.8336	24.9532	25.9979	24.0461	25.0537	24.3412	24.3819	24.463	28.3073	28.4376	28.5462	A0A180GU09	1034741862	OAV95869.1	hypothetical protein PTTG_04892	Puccinia triticina 1-1 BBBD Race 1	Puccinia triticina 1-1 BBBD Race 1
	+	2.04918	-2.80592	tr|A0A0C4EWC1|A0A0C4EWC1_PUCT1	tr|A0A0C4EWC1|A0A0C4EWC1_PUCT1	tr|A0A0C4EWC1|A0A0C4EWC1_PUCT1 40S ribosomal protein S8 OS=Puccinia triticina (isolate 1-1 / race 1 (BBBD)) GN=PTTG_05114 PE=3 SV=1	6	6	6	15.5	15.5	15.5	72.345	41.617	611760000	13	4.79466	0.0148	-2.36057	-1.47932	24.2426	25.0574	24.9973	24.7968	25.0199	24.9795	26.3641	24.7687	24.7402	27.271	27.1894	27.4176	A0A0C4EWC1	1034737379	OAV91441.1	40S ribosomal protein S8	Puccinia triticina 1-1 BBBD Race 1	Puccinia triticina 1-1 BBBD Race 1
	+	1.83632	-2.34066	tr|A0A0C4EWG3|A0A0C4EWG3_PUCT1;tr|A0A180GQG3|A0A180GQG3_PUCT1	tr|A0A0C4EWG3|A0A0C4EWG3_PUCT1;tr|A0A180GQG3|A0A180GQG3_PUCT1	tr|A0A0C4EWG3|A0A0C4EWG3_PUCT1 Uncharacterized protein OS=Puccinia triticina (isolate 1-1 / race 1 (BBBD)) PE=3 SV=1;tr|A0A180GQG3|A0A180GQG3_PUCT1 40S ribosomal protein S11 OS=Puccinia triticina (isolate 1-1 / race 1 (BBBD)) GN=PTTG_05158 PE=3 SV=1	8	6	6	59.9	50.7	50.7	16.174	53.265	4138900000	40	4.91881	0.00128814	-5.43426	-3.18709	26.4857	26.4857	24.6645	24.2827	24.6163	24.6101	24.2839	25.3531	25.7751	30.1392	30.0797	29.5931	A0A0C4EWG3	1034740609	OAV94629.1	40S ribosomal protein S11	Puccinia triticina 1-1 BBBD Race 1	Puccinia triticina 1-1 BBBD Race 1
	+	3.25597	-3.12092	tr|A0A180G3A0|A0A180G3A0_PUCT1;tr|A0A0C4EWI8|A0A0C4EWI8_PUCT1	tr|A0A180G3A0|A0A180G3A0_PUCT1;tr|A0A0C4EWI8|A0A0C4EWI8_PUCT1	tr|A0A180G3A0|A0A180G3A0_PUCT1 Coatomer subunit delta OS=Puccinia triticina (isolate 1-1 / race 1 (BBBD)) GN=PTTG_05183 PE=3 SV=1;tr|A0A0C4EWI8|A0A0C4EWI8_PUCT1 Coatomer subunit delta OS=Puccinia triticina (isolate 1-1 / race 1 (BBBD)) PE=3 SV=1	4	4	4	37.8	37.8	37.8	20.393	139.34	994680000	18	2.08418	0.032671	-2.35211	-1.18597	25.465	26.3458	25.3619	25.5787	26.2175	24.7654	25.3669	23.4044	25.5377	28.3315	27.7579	27.5286	A0A180G3A0	554906803	ESK88676.1	coatomer subunit delta	Moniliophthora roreri MCA 2997	Moniliophthora roreri MCA 2997
	+	2.56461	-3.45053	tr|A0A180GRR4|A0A180GRR4_PUCT1;tr|A0A0C4EWJ7|A0A0C4EWJ7_PUCT1;tr|A0A0C4FAE4|A0A0C4FAE4_PUCT1	tr|A0A180GRR4|A0A180GRR4_PUCT1;tr|A0A0C4EWJ7|A0A0C4EWJ7_PUCT1;tr|A0A0C4FAE4|A0A0C4FAE4_PUCT1	tr|A0A180GRR4|A0A180GRR4_PUCT1 ATP-dependent RNA helicase eIF4A OS=Puccinia triticina (isolate 1-1 / race 1 (BBBD)) GN=PTTG_05192 PE=4 SV=1;tr|A0A0C4EWJ7|A0A0C4EWJ7_PUCT1 Uncharacterized protein OS=Puccinia triticina (isolate 1-1 / race 1 (BBBD)) PE=4 SV=1	7	7	7	37.9	37.9	37.9	24.074	140.18	2349900000	27	2.04918	0.0204557	-2.80592	-1.34259	25.1693	25.7131	25.2254	25.4275	27.124	26.1027	25.3398	25.6435	25.4761	28.6915	28.709	29.6715	A0A180GRR4	1034741064	OAV95079.1	ATP-dependent RNA helicase eIF4A	Puccinia triticina 1-1 BBBD Race 1	Puccinia triticina 1-1 BBBD Race 1
	+	3.19554	-5.34024	tr|A0A0C4EWK6|A0A0C4EWK6_PUCT1	tr|A0A0C4EWK6|A0A0C4EWK6_PUCT1	tr|A0A0C4EWK6|A0A0C4EWK6_PUCT1 Protein NMT1 OS=Puccinia triticina (isolate 1-1 / race 1 (BBBD)) GN=PTTG_05201 PE=4 SV=1	4	4	4	23.6	23.6	23.6	15.956	20.685	1118900000	15	1.83632	0.0391704	-2.34066	-1.132	25.8117	26.0275	25.2881	24.7797	26.0551	26.6315	24.0672	24.3349	24.3531	28.4094	28.192	27.8868	A0A0C4EWK6	1034741045	OAV95060.1	protein NMT1	Puccinia triticina 1-1 BBBD Race 1	Puccinia triticina 1-1 BBBD Race 1
	+	3.72435	-4.46644	tr|A0A0C4EWV4|A0A0C4EWV4_PUCT1	tr|A0A0C4EWV4|A0A0C4EWV4_PUCT1	tr|A0A0C4EWV4|A0A0C4EWV4_PUCT1 Uncharacterized protein OS=Puccinia triticina (isolate 1-1 / race 1 (BBBD)) PE=4 SV=1	6	6	6	14.4	14.4	14.4	59.351	19.977	1879000000	18	3.25597	0.0109826	-3.12092	-1.72328	25.0623	26.2522	25.4398	25.8328	25.3147	26.3565	25.7592	24.1326	25.5681	29.1133	28.862	28.8914	A0A0C4EWV4	983143577	KWU41598.1	ARM repeat-containing protein, partial	Rhodotorula sp. JG-1b	Rhodotorula sp. JG-1b
	+	1.97297	-2.72532	tr|A0A180GR64|A0A180GR64_PUCT1;tr|A0A0C4EX69|A0A0C4EX69_PUCT1;tr|A0A180GS16|A0A180GS16_PUCT1	tr|A0A180GR64|A0A180GR64_PUCT1;tr|A0A0C4EX69|A0A0C4EX69_PUCT1;tr|A0A180GS16|A0A180GS16_PUCT1	tr|A0A180GR64|A0A180GR64_PUCT1 Uncharacterized protein OS=Puccinia triticina (isolate 1-1 / race 1 (BBBD)) GN=PTTG_05417 PE=4 SV=1;tr|A0A0C4EX69|A0A0C4EX69_PUCT1 Uncharacterized protein OS=Puccinia triticina (isolate 1-1 / race 1 (BBBD)) PE=4 SV=1;tr|A0A18	11	8	8	33.1	28.1	28.1	45.472	20.149	1032200000	19	2.56461	0.0106847	-3.45053	-1.70605	25.5224	24.4339	26.4904	24.7314	24.3756	23.8206	24.8682	25.117	24.1456	28.4498	27.916	26.9134	A0A180GR64	1419328152	AXA49211.1	complement component 1 Q subcomponent-binding protein, mitochondrial	Malassezia restricta;Malassezia restricta CBS 7877	Malassezia restricta;Malassezia restricta CBS 7877
	+	3.22661	-4.43095	tr|A0A0C4EXA5|A0A0C4EXA5_PUCT1	tr|A0A0C4EXA5|A0A0C4EXA5_PUCT1	tr|A0A0C4EXA5|A0A0C4EXA5_PUCT1 Glutamine synthetase OS=Puccinia triticina (isolate 1-1 / race 1 (BBBD)) GN=PTTG_05453 PE=3 SV=1	6	6	2	21.2	21.2	10	37.53	27.934	3119400000	35	3.19554	0.00344348	-5.34024	-2.60282	25.6417	24.9125	24.9862	23.4778	25.3158	24.0877	24.4786	25.9154	24.9762	29.8541	29.5435	29.5044	A0A0C4EXA5	1034741391	OAV95402.1	glutamine synthetase	Puccinia triticina 1-1 BBBD Race 1	Puccinia triticina 1-1 BBBD Race 1
	+	4.17383	-5.44257	tr|A0A0C4EXB9|A0A0C4EXB9_PUCT1	tr|A0A0C4EXB9|A0A0C4EXB9_PUCT1	tr|A0A0C4EXB9|A0A0C4EXB9_PUCT1 Obg-like ATPase 1 OS=Puccinia triticina (isolate 1-1 / race 1 (BBBD)) GN=PTTG_05467 PE=3 SV=1	8	8	1	10.6	10.6	1	114.27	66.299	2558700000	33	3.72435	0.00424161	-4.46644	-2.43056	24.9185	26.1878	25.4663	25.4738	24.671	24.6795	24.2379	24.9207	24.225	29.0551	29.7741	29.3943	A0A0C4EXB9	1034732346	OAV86989.1	GTP-binding protein YchF	Puccinia triticina 1-1 BBBD Race 1	Puccinia triticina 1-1 BBBD Race 1
	+	3.66021	-6.8334	tr|A0A0C4EXJ5|A0A0C4EXJ5_PUCT1;tr|A0A180H0W7|A0A180H0W7_PUCT1;tr|A0A0C4F7W4|A0A0C4F7W4_PUCT1	tr|A0A0C4EXJ5|A0A0C4EXJ5_PUCT1;tr|A0A180H0W7|A0A180H0W7_PUCT1;tr|A0A0C4F7W4|A0A0C4F7W4_PUCT1	tr|A0A0C4EXJ5|A0A0C4EXJ5_PUCT1 Uncharacterized protein OS=Puccinia triticina (isolate 1-1 / race 1 (BBBD)) PE=4 SV=1;tr|A0A180H0W7|A0A180H0W7_PUCT1 Uncharacterized protein OS=Puccinia triticina (isolate 1-1 / race 1 (BBBD)) GN=PTTG_05544 PE=4 SV=1;tr|A0A0C	9	9	9	41.7	41.7	41.7	29.96	200.38	1473000000	33	1.97297	0.0219612	-2.72532	-1.29611	25.2397	25.2958	26.0636	25.477	25.7632	25.6457	24.4306	26.1733	24.8112	29.5323	27.5985	27.9311	A0A0C4EXJ5	1034744435	OAV98424.1	hypothetical protein PTTG_05544	Puccinia triticina 1-1 BBBD Race 1	Puccinia triticina 1-1 BBBD Race 1
	+	3.08003	-4.47286	tr|A0A180GK88|A0A180GK88_PUCT1;tr|A0A0C4EXR2|A0A0C4EXR2_PUCT1;tr|A0A180GHF9|A0A180GHF9_PUCT1	tr|A0A180GK88|A0A180GK88_PUCT1;tr|A0A0C4EXR2|A0A0C4EXR2_PUCT1	tr|A0A180GK88|A0A180GK88_PUCT1 Uncharacterized protein OS=Puccinia triticina (isolate 1-1 / race 1 (BBBD)) GN=PTTG_05611 PE=4 SV=1;tr|A0A0C4EXR2|A0A0C4EXR2_PUCT1 Uncharacterized protein OS=Puccinia triticina (isolate 1-1 / race 1 (BBBD)) PE=4 SV=1	6	6	6	10.6	10.6	10.6	96.065	41.036	704570000	19	2.55194	0.0469861	-1.96743	-1.09285	25.1419	25.3832	27.4657	25.1254	25.5444	26.1261	24.4417	24.6344	24.7519	27.7203	27.4998	27.478	A0A180GK88	1183461968	ORY85996.1	armadillo-type protein	Leucosporidium creatinivorum	Leucosporidium creatinivorum
	+	1.72465	-2.43262	tr|A0A0C4EXT6|A0A0C4EXT6_PUCT1;tr|A0A180GAY2|A0A180GAY2_PUCT1	tr|A0A0C4EXT6|A0A0C4EXT6_PUCT1;tr|A0A180GAY2|A0A180GAY2_PUCT1	tr|A0A0C4EXT6|A0A0C4EXT6_PUCT1 Chorismate synthase OS=Puccinia triticina (isolate 1-1 / race 1 (BBBD)) PE=3 SV=1;tr|A0A180GAY2|A0A180GAY2_PUCT1 Chorismate synthase OS=Puccinia triticina (isolate 1-1 / race 1 (BBBD)) GN=PTTG_05635 PE=3 SV=1	8	8	8	31.9	31.9	31.9	39.592	104.67	3493200000	33	3.22661	0.00556425	-4.43095	-2.27301	24.6513	27.0068	25.8001	24.533	25.5201	25.9336	24.1363	24.8618	25.0522	29.6916	30.0847	29.5033	A0A0C4EXT6	1034735799	OAV89896.1	chorismate synthase	Puccinia triticina 1-1 BBBD Race 1	Puccinia triticina 1-1 BBBD Race 1
	+	3.04106	-4.33142	tr|A0A0C4EXV9|A0A0C4EXV9_PUCT1	tr|A0A0C4EXV9|A0A0C4EXV9_PUCT1	tr|A0A0C4EXV9|A0A0C4EXV9_PUCT1 3-isopropylmalate dehydrogenase OS=Puccinia triticina (isolate 1-1 / race 1 (BBBD)) GN=PTTG_05658 PE=3 SV=1	17	17	17	46.5	46.5	46.5	48.76	71.912	4445100000	55	4.17383	0.001	-5.44257	-2.99634	24.4646	25.936	25.6934	24.1406	24.9783	25.0451	24.713	24.6644	25.0868	30.3958	30.1252	29.9708	A0A0C4EXV9	1034733849	OAV88051.1	3-isopropylmalate dehydrogenase	Puccinia triticina 1-1 BBBD Race 1	Puccinia triticina 1-1 BBBD Race 1
	+	3.55805	-3.82192	tr|A0A180H1M9|A0A180H1M9_PUCT1;tr|A0A0C4EY97|A0A0C4EY97_PUCT1	tr|A0A180H1M9|A0A180H1M9_PUCT1;tr|A0A0C4EY97|A0A0C4EY97_PUCT1	tr|A0A180H1M9|A0A180H1M9_PUCT1 Aspartate-semialdehyde dehydrogenase OS=Puccinia triticina (isolate 1-1 / race 1 (BBBD)) GN=PTTG_05796 PE=4 SV=1;tr|A0A0C4EY97|A0A0C4EY97_PUCT1 Uncharacterized protein OS=Puccinia triticina (isolate 1-1 / race 1 (BBBD)) PE=4	7	7	7	27.2	27.2	27.2	29.255	208.73	11689000000	59	3.66021	0	-6.8334	-3.35569	26.4648	25.7307	23.572	23.788	25.5348	25.0175	25.2027	25.5546	25.0086	31.4308	31.8863	31.5234	A0A180H1M9	1034744939	OAV98926.1	aspartate-semialdehyde dehydrogenase	Puccinia triticina 1-1 BBBD Race 1	Puccinia triticina 1-1 BBBD Race 1
	+	3.76155	-4.5428	tr|A0A0C4EYC0|A0A0C4EYC0_PUCT1	tr|A0A0C4EYC0|A0A0C4EYC0_PUCT1	tr|A0A0C4EYC0|A0A0C4EYC0_PUCT1 Large subunit ribosomal protein L9e OS=Puccinia triticina (isolate 1-1 / race 1 (BBBD)) GN=PTTG_05820 PE=4 SV=1	18	18	18	34.8	34.8	34.8	93.624	192.42	2189900000	65	3.08003	0.00601081	-4.47286	-2.2419	24.3049	26.0583	26.7147	25.4258	24.1841	24.1713	25.8047	25.4724	24.2077	29.5816	28.9401	28.678	A0A0C4EYC0	1034736604	OAV90682.1	large subunit ribosomal protein L9e	Puccinia triticina 1-1 BBBD Race 1	Puccinia triticina 1-1 BBBD Race 1
	+	3.26507	-5.99605	tr|A0A0C4EYC6|A0A0C4EYC6_PUCT1;tr|A0A180GE00|A0A180GE00_PUCT1	tr|A0A0C4EYC6|A0A0C4EYC6_PUCT1;tr|A0A180GE00|A0A180GE00_PUCT1	tr|A0A0C4EYC6|A0A0C4EYC6_PUCT1 Uncharacterized protein OS=Puccinia triticina (isolate 1-1 / race 1 (BBBD)) PE=3 SV=1;tr|A0A180GE00|A0A180GE00_PUCT1 Uncharacterized protein (Fragment) OS=Puccinia triticina (isolate 1-1 / race 1 (BBBD)) GN=PTTG_05826 PE=3 SV	8	8	8	29.8	29.8	29.8	42.202	67.607	903440000	18	1.72465	0.0379342	-2.43262	-1.13803	24.5907	24.5425	25.6776	25.4814	26.2915	24.3117	24.4557	25.6406	25.7361	28.2935	27.3402	27.7488	A0A0C4EYC6	331243120	XP_003334204.1	chaperonin GroS	Puccinia graminis f. sp. tritici CRL 75-36-700-3	Puccinia graminis f. sp. tritici CRL 75-36-700-3
	+	3.61544	-4.36194	tr|A0A0C4EYL0|A0A0C4EYL0_PUCT1;tr|A0A180GWX7|A0A180GWX7_PUCT1	tr|A0A0C4EYL0|A0A0C4EYL0_PUCT1;tr|A0A180GWX7|A0A180GWX7_PUCT1	tr|A0A0C4EYL0|A0A0C4EYL0_PUCT1 Uncharacterized protein OS=Puccinia triticina (isolate 1-1 / race 1 (BBBD)) PE=4 SV=1;tr|A0A180GWX7|A0A180GWX7_PUCT1 Uncharacterized protein OS=Puccinia triticina (isolate 1-1 / race 1 (BBBD)) GN=PTTG_05910 PE=4 SV=1	16	6	6	40.1	20.3	20.3	39.863	119.41	3376400000	36	3.04106	0.0070101	-4.33142	-2.17573	25.6009	25.8626	25.8202	26.0043	24.5229	25.9022	24.6219	24.9938	25.5583	29.7044	30.0329	29.6865	A0A0C4EYL0	597971353	XP_007360923.1	Osmotin thaumatin-like protein	Dichomitus squalens LYAD-421 SS1	Dichomitus squalens LYAD-421 SS1
	+	2.86769	-3.08839	tr|A0A0C4EYL1|A0A0C4EYL1_PUCT1	tr|A0A0C4EYL1|A0A0C4EYL1_PUCT1	tr|A0A0C4EYL1|A0A0C4EYL1_PUCT1 Uncharacterized protein OS=Puccinia triticina (isolate 1-1 / race 1 (BBBD)) GN=PTTG_05911 PE=4 SV=1	8	8	8	23.5	23.5	23.5	42.332	112.6	1713600000	28	3.55805	0.00705769	-3.82192	-2.10161	25.6301	26.4742	26.4293	25.4198	24.8335	24.4684	25.1979	22.9366	24.7881	28.5472	29.042	28.5982	A0A0C4EYL1	1418865284	XP_025354855.1	secreted protein	Meira miltonrushii	Meira miltonrushii
	+	3.05349	-2.99389	tr|A0A0C4EYL5|A0A0C4EYL5_PUCT1	tr|A0A0C4EYL5|A0A0C4EYL5_PUCT1	tr|A0A0C4EYL5|A0A0C4EYL5_PUCT1 Uncharacterized protein OS=Puccinia triticina (isolate 1-1 / race 1 (BBBD)) GN=PTTG_05915 PE=3 SV=1	11	11	11	52.6	52.6	52.6	21.634	83.003	4753700000	75	3.76155	0.00438889	-4.5428	-2.47432	24.6567	24.1886	25.8621	25.5196	25.8508	25.5443	24.9767	22.9656	25.0602	30.1305	30.7565	29.6562	A0A0C4EYL5	403171639	XP_003330839.2	cofilin	Puccinia graminis f. sp. tritici CRL 75-36-700-3	Puccinia graminis f. sp. tritici CRL 75-36-700-3
	+	3.71173	-4.7962	tr|A0A0C4EYQ4|A0A0C4EYQ4_PUCT1	tr|A0A0C4EYQ4|A0A0C4EYQ4_PUCT1	tr|A0A0C4EYQ4|A0A0C4EYQ4_PUCT1 Uncharacterized protein OS=Puccinia triticina (isolate 1-1 / race 1 (BBBD)) GN=PTTG_05956 PE=4 SV=1	5	5	5	49.1	49.1	49.1	12.341	68.697	9054500000	50	3.26507	0.00223256	-5.99605	-2.86296	25.1384	26.4705	24.7938	24.519	26.1491	24.8437	24.845	25.6194	25.8167	30.6108	31.7336	31.1554	A0A0C4EYQ4	1034746135	OAW00119.1	hypothetical protein PTTG_05956	Puccinia triticina 1-1 BBBD Race 1	Puccinia triticina 1-1 BBBD Race 1
	+	3.26507	-5.16072	tr|A0A0C4EZ44|A0A0C4EZ44_PUCT1	tr|A0A0C4EZ44|A0A0C4EZ44_PUCT1	tr|A0A0C4EZ44|A0A0C4EZ44_PUCT1 Uncharacterized protein OS=Puccinia triticina (isolate 1-1 / race 1 (BBBD)) GN=PTTG_06099 PE=4 SV=1	2	2	2	15.8	15.8	15.8	19.26	59.838	2713500000	18	3.61544	0.0055	-4.36194	-2.35589	24.4863	25.4183	27.025	24.963	25.6374	24.5328	25.6123	26.7269	25.8393	29.6528	29.4062	29.1601	A0A0C4EZ44	331228013	XP_003326674.1	glutaredoxin 3	Puccinia graminis f. sp. tritici CRL 75-36-700-3	Puccinia graminis f. sp. tritici CRL 75-36-700-3
	+	4.05409	-6.09834	tr|A0A0C4EZ56|A0A0C4EZ56_PUCT1;tr|A0A180GEP6|A0A180GEP6_PUCT1	tr|A0A0C4EZ56|A0A0C4EZ56_PUCT1	tr|A0A0C4EZ56|A0A0C4EZ56_PUCT1 Elongation factor EF-3 OS=Puccinia triticina (isolate 1-1 / race 1 (BBBD)) GN=PTTG_06112 PE=4 SV=1	2	2	2	14.3	14.3	14.3	16.609	12.287	864190000	10	2.86769	0.0119484	-3.08839	-1.63536	24.8534	25.0637	26.6117	24.8352	25.2994	24.1072	25.9887	25.7073	24.9161	28.0337	27.9861	27.4872	A0A0C4EZ56	1034735308	OAV89419.1	elongation factor EF-3	Puccinia triticina 1-1 BBBD Race 1	Puccinia triticina 1-1 BBBD Race 1
	+	1.96768	-2.30648	tr|A0A0C4EZA5|A0A0C4EZA5_PUCT1;tr|A0A180GBG1|A0A180GBG1_PUCT1	tr|A0A0C4EZA5|A0A0C4EZA5_PUCT1;tr|A0A180GBG1|A0A180GBG1_PUCT1	tr|A0A0C4EZA5|A0A0C4EZA5_PUCT1 Uncharacterized protein OS=Puccinia triticina (isolate 1-1 / race 1 (BBBD)) PE=4 SV=1;tr|A0A180GBG1|A0A180GBG1_PUCT1 Uncharacterized protein OS=Puccinia triticina (isolate 1-1 / race 1 (BBBD)) GN=PTTG_06164 PE=3 SV=1	3	3	3	20.3	20.3	20.3	15.6	21.114	932340000	14	3.05349	0.0122564	-2.99389	-1.63002	26.0462	25.5963	25.7874	24.6229	24.7055	25.5211	25.9699	25.5594	25.452	28.1476	27.5918	28.0918	A0A0C4EZA5	599387814	XP_007409974.1	family 17 glycoside hydrolase	Melampsora larici-populina 98AG31	Melampsora larici-populina 98AG31
	+	3.40346	-4.66971	tr|A0A0C4EZA7|A0A0C4EZA7_PUCT1	tr|A0A0C4EZA7|A0A0C4EZA7_PUCT1	tr|A0A0C4EZA7|A0A0C4EZA7_PUCT1 Hydroxymethylglutaryl-CoA synthase OS=Puccinia triticina (isolate 1-1 / race 1 (BBBD)) GN=PTTG_06166 PE=3 SV=1	4	4	4	16.9	16.9	16.9	43.95	12.205	4086100000	20	3.71173	0.00433613	-4.7962	-2.57136	25.8462	25.3771	26.2585	25.2398	24.4601	25.3118	24.4073	26.2199	24.1164	29.8287	29.3657	30.206	A0A0C4EZA7	1034735773	OAV89871.1	hydroxymethylglutaryl-CoA synthase	Puccinia triticina 1-1 BBBD Race 1	Puccinia triticina 1-1 BBBD Race 1
	+	3.60132	-5.19058	tr|A0A0C4EZI4|A0A0C4EZI4_PUCT1	tr|A0A0C4EZI4|A0A0C4EZI4_PUCT1	tr|A0A0C4EZI4|A0A0C4EZI4_PUCT1 Uncharacterized protein OS=Puccinia triticina (isolate 1-1 / race 1 (BBBD)) GN=PTTG_06243 PE=4 SV=1	8	8	8	74	74	74	11.245	262.57	5691400000	31	3.26507	0.0043	-5.16072	-2.56555	24.7054	24.7576	24.853	24.3016	25.804	25.6964	26.2797	23.9603	25.3671	30.2404	30.759	30.2847	A0A0C4EZI4	1139917464	GAV99593.1	DUF757-domain-containing protein	shiitake mushroom	Lentinula edodes
	+	4.40736	-5.64766	tr|A0A0C4EZL4|A0A0C4EZL4_PUCT1	tr|A0A0C4EZL4|A0A0C4EZL4_PUCT1	tr|A0A0C4EZL4|A0A0C4EZL4_PUCT1 Uncharacterized protein OS=Puccinia triticina (isolate 1-1 / race 1 (BBBD)) GN=PTTG_06273 PE=4 SV=1	33	33	33	40.2	40.2	40.2	116.02	323.31	19622000000	207	4.05409	0	-6.09834	-3.24356	25.0064	26.1039	24.7559	26.5707	26.1954	25.5925	25.581	26.0926	23.754	32.6675	32.1889	31.7971	A0A0C4EZL4	761924023	KIY45376.1	polyadenylate-binding protein	Fistulina hepatica ATCC 64428	Fistulina hepatica ATCC 64428
	+	1.47958	-3.90124	tr|A0A0C4EZR4|A0A0C4EZR4_PUCT1	tr|A0A0C4EZR4|A0A0C4EZR4_PUCT1	tr|A0A0C4EZR4|A0A0C4EZR4_PUCT1 Uncharacterized protein OS=Puccinia triticina (isolate 1-1 / race 1 (BBBD)) GN=PTTG_06324 PE=4 SV=1	3	3	3	9.2	9.2	9.2	40.465	6.9873	823830000	7	1.96768	0.0361837	-2.30648	-1.14644	24.4463	26.9134	25.2758	24.7361	26.2219	25.0675	26.3069	26.5125	24.2851	27.2886	28.1121	27.5442	A0A0C4EZR4	1405427389	SCZ91925.1	BZ3501_MvSof-1269-A2-R1_Chr2-1g04182	Microbotryum saponariae	Microbotryum saponariae
	+	3.10051	-8.19264	tr|A0A0C4EZX0|A0A0C4EZX0_PUCT1	tr|A0A0C4EZX0|A0A0C4EZX0_PUCT1	tr|A0A0C4EZX0|A0A0C4EZX0_PUCT1 5-methyltetrahydropteroyltriglutamate-homocysteine methyltransferase OS=Puccinia triticina (isolate 1-1 / race 1 (BBBD)) GN=PTTG_06381 PE=3 SV=1	8	8	8	22	22	22	58.574	252.87	3138700000	42	3.40346	0.00415789	-4.66971	-2.42405	25.4075	24.3301	24.0797	25.8361	24.4327	24.758	23.6099	25.0068	24.0367	29.7295	29.5904	29.7161	A0A0C4EZX0	1034741527	OAV95537.1	5-methyltetrahydropteroyltriglutamate-homocysteine methyltransferase	Puccinia triticina 1-1 BBBD Race 1	Puccinia triticina 1-1 BBBD Race 1
	+	4.50636	-6.33476	tr|A0A0C4F018|A0A0C4F018_PUCT1;tr|A0A180GXY7|A0A180GXY7_PUCT1;tr|A0A0C4EY59|A0A0C4EY59_PUCT1	tr|A0A0C4F018|A0A0C4F018_PUCT1	tr|A0A0C4F018|A0A0C4F018_PUCT1 Uncharacterized protein OS=Puccinia triticina (isolate 1-1 / race 1 (BBBD)) GN=PTTG_06434 PE=4 SV=1	9	9	9	53.6	53.6	53.6	19.427	239.79	7060800000	41	3.60132	0.00259048	-5.19058	-2.70095	25.1529	26.2051	24.5057	25.5868	26.2075	24.9952	25.0578	25.6134	25.1024	31.0589	30.3184	30.9839	A0A0C4F018	1022852384	XP_016272337.1	macrofage activating glycoprotein	Rhodotorula toruloides;Rhodotorula toruloides NP11	Rhodotorula toruloides;Rhodotorula toruloides NP11
	+	4.36223	-8.21829	tr|A0A0C4F058|A0A0C4F058_PUCT1;tr|A0A180GH01|A0A180GH01_PUCT1	tr|A0A0C4F058|A0A0C4F058_PUCT1;tr|A0A180GH01|A0A180GH01_PUCT1	tr|A0A0C4F058|A0A0C4F058_PUCT1 Uncharacterized protein OS=Puccinia triticina (isolate 1-1 / race 1 (BBBD)) PE=4 SV=1;tr|A0A180GH01|A0A180GH01_PUCT1 Uncharacterized protein OS=Puccinia triticina (isolate 1-1 / race 1 (BBBD)) GN=PTTG_06474 PE=4 SV=1	14	14	14	41	41	41	49.906	307.87	8295100000	80	4.40736	0.0012459	-5.64766	-3.16104	25.2462	25.774	26.3139	25.5371	24.8169	25.6842	25.0746	24.483	24.73	31.0382	30.7995	31.1435	A0A0C4F058	31087954	AAP42832.1	chitinase	Puccinia triticina	Puccinia triticina
	+	2.46727	-3.38036	tr|A0A0C4F080|A0A0C4F080_PUCT1;tr|A0A180GG86|A0A180GG86_PUCT1	tr|A0A0C4F080|A0A0C4F080_PUCT1;tr|A0A180GG86|A0A180GG86_PUCT1	tr|A0A0C4F080|A0A0C4F080_PUCT1 Eukaryotic translation initiation factor 3 subunit D OS=Puccinia triticina (isolate 1-1 / race 1 (BBBD)) PE=3 SV=1;tr|A0A180GG86|A0A180GG86_PUCT1 Eukaryotic translation initiation factor 3 subunit D OS=Puccinia triticina (iso	4	4	4	23.6	23.6	23.6	29.956	323.31	1801400000	30	1.47958	0.0172418	-3.90124	-1.43317	26.1736	26.3647	24.5201	22.7663	25.3104	26.9646	25.2466	24.7959	24.7515	29.0205	28.8592	28.8653	A0A0C4F080	403169133	XP_003328654.2	translation initiation factor eIF-3 subunit 7	Puccinia graminis f. sp. tritici CRL 75-36-700-3	Puccinia graminis f. sp. tritici CRL 75-36-700-3
	+	5.75818	-5.53517	tr|A0A0C4F0D9|A0A0C4F0D9_PUCT1	tr|A0A0C4F0D9|A0A0C4F0D9_PUCT1	tr|A0A0C4F0D9|A0A0C4F0D9_PUCT1 14-3-3-like protein OS=Puccinia triticina (isolate 1-1 / race 1 (BBBD)) GN=PTTG_06555 PE=3 SV=1	41	41	41	56.4	56.4	56.4	85.501	323.31	53840000000	348	3.10051	0	-8.19264	-3.41956	26.7085	24.8231	24.4757	25.0034	24.8803	25.5058	26.0303	23.3998	24.2628	33.9909	34.3892	31.5874	A0A0C4F0D9	1034736621	OAV90699.1	14-3-3-like protein	Puccinia triticina 1-1 BBBD Race 1	Puccinia triticina 1-1 BBBD Race 1
	+	4.11592	-3.62831	tr|A0A180G7Z4|A0A180G7Z4_PUCT1;tr|A0A0C4F0E0|A0A0C4F0E0_PUCT1	tr|A0A180G7Z4|A0A180G7Z4_PUCT1;tr|A0A0C4F0E0|A0A0C4F0E0_PUCT1	tr|A0A180G7Z4|A0A180G7Z4_PUCT1 Proteasome subunit beta OS=Puccinia triticina (isolate 1-1 / race 1 (BBBD)) GN=PTTG_06556 PE=3 SV=1;tr|A0A0C4F0E0|A0A0C4F0E0_PUCT1 Proteasome subunit beta OS=Puccinia triticina (isolate 1-1 / race 1 (BBBD)) PE=3 SV=1	9	9	9	43.5	43.5	43.5	29.518	305.83	18250000000	95	4.50636	0	-6.33476	-3.51235	25.2882	24.3734	25.6231	25.9323	26.1836	25.4272	24.9055	24.5196	27.0761	31.8837	32.5791	32.0845	A0A180G7Z4	403178659	XP_003337064.2	20S proteasome subunit beta 7	Puccinia graminis f. sp. tritici CRL 75-36-700-3	Puccinia graminis f. sp. tritici CRL 75-36-700-3
	+	3.47454	-6.14605	tr|A0A0C4F0Y7|A0A0C4F0Y7_PUCT1;tr|A0A180H2N2|A0A180H2N2_PUCT1;tr|A0A0C4EZM9|A0A0C4EZM9_PUCT1;tr|A0A0C4EZM8|A0A0C4EZM8_PUCT1;tr|A0A180GT92|A0A180GT92_PUCT1	tr|A0A0C4F0Y7|A0A0C4F0Y7_PUCT1;tr|A0A180H2N2|A0A180H2N2_PUCT1	tr|A0A0C4F0Y7|A0A0C4F0Y7_PUCT1 Phospho-2-dehydro-3-deoxyheptonate aldolase OS=Puccinia triticina (isolate 1-1 / race 1 (BBBD)) PE=3 SV=1;tr|A0A180H2N2|A0A180H2N2_PUCT1 Uncharacterized protein OS=Puccinia triticina (isolate 1-1 / race 1 (BBBD)) GN=PTTG_0675	15	15	14	50.5	50.5	47.1	45.846	323.31	70944000000	269	4.36223	0	-8.21829	-4.26217	24.5669	25.2728	25.844	26.3316	26.2099	25.0865	26.112	26.1239	24.313	33.9157	34.418	33.9492	A0A0C4F0Y7	331241623	XP_003333459.1	3-deoxy-7-phosphoheptulonate synthase	Puccinia graminis f. sp. tritici CRL 75-36-700-3	Puccinia graminis f. sp. tritici CRL 75-36-700-3
	+	1.90475	-4.27429	tr|A0A0C4F107|A0A0C4F107_PUCT1;tr|A0A180GMB8|A0A180GMB8_PUCT1	tr|A0A0C4F107|A0A0C4F107_PUCT1;tr|A0A180GMB8|A0A180GMB8_PUCT1	tr|A0A0C4F107|A0A0C4F107_PUCT1 Thioredoxin reductase OS=Puccinia triticina (isolate 1-1 / race 1 (BBBD)) PE=3 SV=1;tr|A0A180GMB8|A0A180GMB8_PUCT1 Thioredoxin reductase OS=Puccinia triticina (isolate 1-1 / race 1 (BBBD)) GN=PTTG_06777 PE=3 SV=1	8	8	8	22.4	22.4	22.4	50.473	107.74	2459400000	30	2.46727	0.0114834	-3.38036	-1.65393	25.4261	25.2435	25.981	25.1426	26.0082	26.5687	25.2456	24.9873	25.6148	29.9902	28.9437	28.9266	A0A0C4F107	1034739692	OAV93721.1	thioredoxin reductase (NADPH)	Puccinia triticina 1-1 BBBD Race 1	Puccinia triticina 1-1 BBBD Race 1
	+	4.87387	-7.30432	tr|A0A0C4F117|A0A0C4F117_PUCT1	tr|A0A0C4F117|A0A0C4F117_PUCT1	tr|A0A0C4F117|A0A0C4F117_PUCT1 Uncharacterized protein OS=Puccinia triticina (isolate 1-1 / race 1 (BBBD)) PE=3 SV=1	16	10	10	62.3	46	46	29.481	173.31	8873500000	78	5.75818	0	-5.53517	-3.39861	24.8481	26.5035	25.5512	25.6755	25.6436	25.5105	24.9053	24.8339	25.7513	31.2956	31.2278	30.9116	A0A0C4F117	331222999	XP_003324173.1	heat shock 70kDa protein 4	Puccinia graminis f. sp. tritici CRL 75-36-700-3	Puccinia graminis f. sp. tritici CRL 75-36-700-3
	+	2.56238	-2.13283	tr|A0A0C4F163|A0A0C4F163_PUCT1	tr|A0A0C4F163|A0A0C4F163_PUCT1	tr|A0A0C4F163|A0A0C4F163_PUCT1 40S ribosomal protein S21 OS=Puccinia triticina (isolate 1-1 / race 1 (BBBD)) GN=PTTG_06833 PE=3 SV=1	6	6	6	28.4	28.4	28.4	29.885	82.536	2011100000	24	4.11592	0.00716098	-3.62831	-2.11173	25.9767	25.0696	25.0627	25.2029	25.5524	25.2849	25.6066	24.2198	25.7884	29.24	29.0806	28.6044	A0A0C4F163	1034733967	OAV88154.1	40S ribosomal protein S21	Puccinia triticina 1-1 BBBD Race 1	Puccinia triticina 1-1 BBBD Race 1
	+	4.67375	-6.14534	tr|A0A0C4F197|A0A0C4F197_PUCT1;tr|A0A180G5Y9|A0A180G5Y9_PUCT1	tr|A0A0C4F197|A0A0C4F197_PUCT1;tr|A0A180G5Y9|A0A180G5Y9_PUCT1	tr|A0A0C4F197|A0A0C4F197_PUCT1 Uncharacterized protein OS=Puccinia triticina (isolate 1-1 / race 1 (BBBD)) PE=3 SV=1;tr|A0A180G5Y9|A0A180G5Y9_PUCT1 Heat shock protein 90-1 OS=Puccinia triticina (isolate 1-1 / race 1 (BBBD)) GN=PTTG_06867 PE=3 SV=1	10	10	10	34.6	34.6	34.6	40.564	200.03	8732500000	77	3.47454	0.00102703	-6.14605	-3.01552	25.623	25.7911	26.6346	24.1664	25.9162	24.8715	24.0414	24.8743	25.3792	31.1332	31.4357	30.8234	A0A0C4F197	1034733893	OAV88091.1	heat shock protein 90-1	Puccinia triticina 1-1 BBBD Race 1	Puccinia triticina 1-1 BBBD Race 1
	+	2.49313	-4.05253	tr|A0A0C4F1A2|A0A0C4F1A2_PUCT1;tr|A0A180GQI5|A0A180GQI5_PUCT1	tr|A0A0C4F1A2|A0A0C4F1A2_PUCT1;tr|A0A180GQI5|A0A180GQI5_PUCT1	tr|A0A0C4F1A2|A0A0C4F1A2_PUCT1 Alanine--tRNA ligase OS=Puccinia triticina (isolate 1-1 / race 1 (BBBD)) GN=ALA1 PE=3 SV=1;tr|A0A180GQI5|A0A180GQI5_PUCT1 Alanine--tRNA ligase OS=Puccinia triticina (isolate 1-1 / race 1 (BBBD)) GN=ALA1 PE=3 SV=1	12	12	12	55.2	55.2	55.2	38.131	133.54	2909500000	46	1.90475	0.0108316	-4.27429	-1.7169	24.5894	25.3223	24.6931	23.1991	26.1676	26.0199	24.4055	24.0826	24.2367	29.7807	29.0352	29.3936	A0A0C4F1A2	1034740669	OAV94688.1	alanyl-tRNA synthetase	Puccinia triticina 1-1 BBBD Race 1	Puccinia triticina 1-1 BBBD Race 1
	+	2.01518	-3.27179	tr|A0A180GPE4|A0A180GPE4_PUCT1;tr|A0A0C4F1A3|A0A0C4F1A3_PUCT1	tr|A0A180GPE4|A0A180GPE4_PUCT1;tr|A0A0C4F1A3|A0A0C4F1A3_PUCT1	tr|A0A180GPE4|A0A180GPE4_PUCT1 Small subunit ribosomal protein S2e OS=Puccinia triticina (isolate 1-1 / race 1 (BBBD)) GN=PTTG_06873 PE=3 SV=1;tr|A0A0C4F1A3|A0A0C4F1A3_PUCT1 Uncharacterized protein OS=Puccinia triticina (isolate 1-1 / race 1 (BBBD)) PE=3 S	35	35	3	30.8	30.8	2.8	145.25	323.31	27981000000	262	4.87387	0	-7.30432	-4.09684	25.0131	25.0643	24.2299	25.5323	25.0734	25.9673	24.1326	24.4749	26.2161	32.6101	33.0048	32.8712	A0A180GPE4	1034740668	OAV94687.1	small subunit ribosomal protein S2e	Puccinia triticina 1-1 BBBD Race 1	Puccinia triticina 1-1 BBBD Race 1
	+	3.23846	-4.72943	tr|A0A0C4F1H2|A0A0C4F1H2_PUCT1	tr|A0A0C4F1H2|A0A0C4F1H2_PUCT1	tr|A0A0C4F1H2|A0A0C4F1H2_PUCT1 Uncharacterized protein OS=Puccinia triticina (isolate 1-1 / race 1 (BBBD)) GN=PTTG_06943 PE=4 SV=1	3	3	3	49.4	49.4	49.4	9.5035	71.698	489140000	15	2.56238	0.0337094	-2.13283	-1.16968	25.0794	27.3976	25.419	24.7054	25.0642	25.1659	27.4958	26.2343	25.4259	26.936	27.6809	26.7171	A0A0C4F1H2	1240232766	PAV16225.1	periplasmic binding -like II	Pyrrhoderma noxium	Pyrrhoderma noxium
	+	3.83764	-5.95483	tr|A0A0C4F1S9|A0A0C4F1S9_PUCT1	tr|A0A0C4F1S9|A0A0C4F1S9_PUCT1	tr|A0A0C4F1S9|A0A0C4F1S9_PUCT1 Uncharacterized protein OS=Puccinia triticina (isolate 1-1 / race 1 (BBBD)) PE=4 SV=1	29	23	23	42.8	35.8	35.8	80.403	323.31	24008000000	153	4.67375	0	-6.14534	-3.47733	26.5128	25.9945	25.0361	26.3607	26.6681	26.0059	25.1609	26.1185	24.1122	32.7719	32.5614	32.1374	A0A0C4F1S9	331244023	XP_003334653.1	histone chaperone ASF1	Puccinia graminis f. sp. tritici CRL 75-36-700-3	Puccinia graminis f. sp. tritici CRL 75-36-700-3
	+	2.87959	-5.55268	tr|A0A0C4F1V6|A0A0C4F1V6_PUCT1	tr|A0A0C4F1V6|A0A0C4F1V6_PUCT1	tr|A0A0C4F1V6|A0A0C4F1V6_PUCT1 Uncharacterized protein OS=Puccinia triticina (isolate 1-1 / race 1 (BBBD)) GN=PTTG_07077 PE=4 SV=1	16	14	14	19.3	17.3	17.3	108.52	48.452	2474600000	37	2.49313	0.00913386	-4.05253	-1.89234	25.5	25.7003	24.9044	24.2684	26.4426	25.0479	25.9378	25.2016	25.1578	29.2146	29.2277	29.4743	A0A0C4F1V6	331214129	XP_003319746.1	60S ribosomal protein L22	Puccinia graminis f. sp. tritici CRL 75-36-700-3	Puccinia graminis f. sp. tritici CRL 75-36-700-3
	+	3.32269	-4.68217	tr|A0A0C4F208|A0A0C4F208_PUCT1	tr|A0A0C4F208|A0A0C4F208_PUCT1	tr|A0A0C4F208|A0A0C4F208_PUCT1 Uncharacterized protein OS=Puccinia triticina (isolate 1-1 / race 1 (BBBD)) GN=PTTG_07129 PE=4 SV=1	5	5	5	27.8	27.8	27.8	28.82	108.61	3585200000	30	2.01518	0.01451	-3.27179	-1.48481	25.539	25.2897	25.1761	25.1098	26.0086	26.0566	25.4459	24.0011	24.7753	30.1296	28.918	27.9427	A0A0C4F208	913847619	KNZ48236.1	small subunit ribosomal protein S10e	Puccinia sorghi	Puccinia sorghi
	+	5.11135	-4.30327	tr|A0A180H165|A0A180H165_PUCT1;tr|A0A180H0H3|A0A180H0H3_PUCT1;tr|A0A0C4F210|A0A0C4F210_PUCT1	tr|A0A180H165|A0A180H165_PUCT1;tr|A0A180H0H3|A0A180H0H3_PUCT1;tr|A0A0C4F210|A0A0C4F210_PUCT1	tr|A0A180H165|A0A180H165_PUCT1 Uncharacterized protein OS=Puccinia triticina (isolate 1-1 / race 1 (BBBD)) GN=PTTG_07131 PE=3 SV=1;tr|A0A180H0H3|A0A180H0H3_PUCT1 Uncharacterized protein OS=Puccinia triticina (isolate 1-1 / race 1 (BBBD)) GN=PTTG_07131 PE=3	11	11	11	44.7	44.7	44.7	36.391	179.09	4760400000	43	3.23846	0.00481529	-4.72943	-2.3931	24.2175	24.7217	25.7153	24.8636	26.2278	25.1771	25.0278	26.154	24.9078	29.6959	30.4977	30.2632	A0A180H165	403171616	XP_003330818.2	protein phosphatase	Puccinia graminis f. sp. tritici CRL 75-36-700-3	Puccinia graminis f. sp. tritici CRL 75-36-700-3
	+	3.05061	-4.39388	tr|A0A0C4F219|A0A0C4F219_PUCT1;tr|A0A0C4ET25|A0A0C4ET25_PUCT1;tr|A0A0C4F3F2|A0A0C4F3F2_PUCT1	tr|A0A0C4F219|A0A0C4F219_PUCT1	tr|A0A0C4F219|A0A0C4F219_PUCT1 Glucose 1-dehydrogenase OS=Puccinia triticina (isolate 1-1 / race 1 (BBBD)) GN=PTTG_07140 PE=4 SV=1	6	6	2	44.5	44.5	18.8	25.292	193.4	8479600000	43	3.83764	0.00111765	-5.95483	-3.09951	26.0732	24.5751	25.3087	24.3385	25.4755	25.6714	24.9266	24.8875	25.292	31.2382	31.1125	30.9993	A0A0C4F219	1034737174	OAV91240.1	glucose 1-dehydrogenase	Puccinia triticina 1-1 BBBD Race 1	Puccinia triticina 1-1 BBBD Race 1
	+	2.07926	-3.75857	tr|A0A0C4F2A8|A0A0C4F2A8_PUCT1	tr|A0A0C4F2A8|A0A0C4F2A8_PUCT1	tr|A0A0C4F2A8|A0A0C4F2A8_PUCT1 Uncharacterized protein OS=Puccinia triticina (isolate 1-1 / race 1 (BBBD)) GN=PTTG_07229 PE=4 SV=1	2	2	2	22	22	22	13.558	28.555	5092600000	16	2.87959	0.0049375	-5.55268	-2.53145	25.4286	25.6666	26.0327	24.7039	26.0436	23.7748	25.3769	23.7221	26.4438	30.623	30.5985	29.9588	A0A0C4F2A8	1358971994	PRQ72779.1	Ribosome maturation protein SBDS	Rhodotorula toruloides	Rhodotorula toruloides
	+	4.11325	-5.5257	tr|A0A0C4F2N4|A0A0C4F2N4_PUCT1	tr|A0A0C4F2N4|A0A0C4F2N4_PUCT1	tr|A0A0C4F2N4|A0A0C4F2N4_PUCT1 Succinate--CoA ligase [ADP-forming] subunit alpha, mitochondrial OS=Puccinia triticina (isolate 1-1 / race 1 (BBBD)) GN=PTTG_07355 PE=3 SV=1	6	6	6	40.1	40.1	40.1	17.54	84.58	5179200000	49	3.32269	0.00484615	-4.68217	-2.40296	25.7161	25.655	24.1537	25.8769	26.2644	24.7956	24.1509	25.1348	26.2166	30.1502	30.3973	30.4359	A0A0C4F2N4	1034736218	OAV90304.1	succinyl-CoA ligase subunit alpha	Puccinia triticina 1-1 BBBD Race 1	Puccinia triticina 1-1 BBBD Race 1
	+	4.33165	-5.68371	tr|A0A0C4F2S7|A0A0C4F2S7_PUCT1;tr|A0A180GHN3|A0A180GHN3_PUCT1;tr|A0A180GVC4|A0A180GVC4_PUCT1;tr|A0A0C4EVE6|A0A0C4EVE6_PUCT1	tr|A0A0C4F2S7|A0A0C4F2S7_PUCT1;tr|A0A180GHN3|A0A180GHN3_PUCT1	tr|A0A0C4F2S7|A0A0C4F2S7_PUCT1 Uncharacterized protein OS=Puccinia triticina (isolate 1-1 / race 1 (BBBD)) PE=4 SV=1;tr|A0A180GHN3|A0A180GHN3_PUCT1 Uncharacterized protein OS=Puccinia triticina (isolate 1-1 / race 1 (BBBD)) GN=PTTG_07398 PE=4 SV=1	8	8	8	30.5	30.5	30.5	43.589	61.352	3188900000	39	5.11135	0.00350442	-4.30327	-2.6155	26.0819	25.5123	24.9506	25.1127	25.4415	25.3492	26.1345	24.4904	25.6033	29.3905	29.7274	29.6954	A0A0C4F2S7	599384037	XP_007409268.1	thaumatin-like protein	Melampsora larici-populina 98AG31	Melampsora larici-populina 98AG31
	+	3.53241	-3.36771	tr|A0A180GPQ3|A0A180GPQ3_PUCT1;tr|A0A0C4F398|A0A0C4F398_PUCT1	tr|A0A180GPQ3|A0A180GPQ3_PUCT1;tr|A0A0C4F398|A0A0C4F398_PUCT1	tr|A0A180GPQ3|A0A180GPQ3_PUCT1 Phosphomannomutase OS=Puccinia triticina (isolate 1-1 / race 1 (BBBD)) GN=PTTG_07572 PE=3 SV=1;tr|A0A0C4F398|A0A0C4F398_PUCT1 Phosphomannomutase OS=Puccinia triticina (isolate 1-1 / race 1 (BBBD)) PE=3 SV=1	7	7	7	31.8	31.8	31.8	30.274	54.602	2084700000	32	3.05061	0.00570256	-4.39388	-2.20242	25.6325	25.2706	25.0784	24.1577	24.2898	25.546	25.6582	25.5452	25.4359	28.8007	29.5005	28.8739	A0A180GPQ3	1034740259	OAV94282.1	phosphomannomutase	Puccinia triticina 1-1 BBBD Race 1	Puccinia triticina 1-1 BBBD Race 1
	+	2.82426	-4.6758	tr|A0A0C4F3B5|A0A0C4F3B5_PUCT1	tr|A0A0C4F3B5|A0A0C4F3B5_PUCT1	tr|A0A0C4F3B5|A0A0C4F3B5_PUCT1 Uncharacterized protein OS=Puccinia triticina (isolate 1-1 / race 1 (BBBD)) GN=PTTG_07592 PE=4 SV=1	6	6	6	50	50	50	13.42	219.35	1671800000	36	2.07926	0.0114455	-3.75857	-1.65229	24.7346	25.1514	25.7875	24.6076	26.2954	23.8037	25.4624	23.9107	24.5801	28.8512	28.9611	28.1703	A0A0C4F3B5	1216221850	SCV72782.1	BQ2448_4319	Microbotryum intermedium	Microbotryum intermedium
	+	4.61368	-4.2003	tr|A0A0C4F3J9|A0A0C4F3J9_PUCT1	tr|A0A0C4F3J9|A0A0C4F3J9_PUCT1	tr|A0A0C4F3J9|A0A0C4F3J9_PUCT1 Adenylosuccinate lyase OS=Puccinia triticina (isolate 1-1 / race 1 (BBBD)) GN=PTTG_07679 PE=3 SV=1	6	6	6	22.6	22.6	22.6	35.732	84.392	5048600000	43	4.11325	0.00101333	-5.5257	-3.01495	26.9357	24.7961	24.7878	25.4347	24.3736	24.8564	24.7294	23.9475	25.6901	30.3949	30.6463	30.2006	A0A0C4F3J9	1034742727	OAV96726.1	adenylosuccinate lyase	Puccinia triticina 1-1 BBBD Race 1	Puccinia triticina 1-1 BBBD Race 1
	+	3.93527	-4.37598	tr|A0A0C4F3S8|A0A0C4F3S8_PUCT1	tr|A0A0C4F3S8|A0A0C4F3S8_PUCT1	tr|A0A0C4F3S8|A0A0C4F3S8_PUCT1 Uncharacterized protein OS=Puccinia triticina (isolate 1-1 / race 1 (BBBD)) PE=4 SV=1	5	5	5	27.9	27.9	27.9	23.191	17.449	7632400000	36	4.33165	0.00122581	-5.68371	-3.15508	25.8483	25.9841	24.6278	25.2606	24.7023	25.5529	24.676	25.1472	25.6229	31.1051	30.9289	30.533	A0A0C4F3S8	331240883	XP_003333091.1	bleomycin hydrolase	Puccinia graminis f. sp. tritici CRL 75-36-700-3	Puccinia graminis f. sp. tritici CRL 75-36-700-3
	+	3.48368	-2.895	tr|A0A180G194|A0A180G194_PUCT1;tr|A0A0C4F3X3|A0A0C4F3X3_PUCT1	tr|A0A180G194|A0A180G194_PUCT1;tr|A0A0C4F3X3|A0A0C4F3X3_PUCT1	tr|A0A180G194|A0A180G194_PUCT1 Proteasome subunit beta type OS=Puccinia triticina (isolate 1-1 / race 1 (BBBD)) GN=PTTG_07807 PE=3 SV=1;tr|A0A0C4F3X3|A0A0C4F3X3_PUCT1 Proteasome subunit beta type OS=Puccinia triticina (isolate 1-1 / race 1 (BBBD)) PE=3 SV=	9	7	6	38.5	32.7	28.4	29.118	24.944	1793800000	22	3.53241	0.00909804	-3.36771	-1.8867	25.715	26.5084	26.7824	25.863	25.7617	24.9622	24.6901	24.2792	25.6814	28.9095	28.8853	28.8952	A0A180G194	1034731266	OAV86417.1	20S proteasome subunit beta 5	Puccinia triticina 1-1 BBBD Race 1	Puccinia triticina 1-1 BBBD Race 1
	+	3.11792	-3.92986	tr|A0A0C4F4L5|A0A0C4F4L5_PUCT1	tr|A0A0C4F4L5|A0A0C4F4L5_PUCT1	tr|A0A0C4F4L5|A0A0C4F4L5_PUCT1 GMP synthase OS=Puccinia triticina (isolate 1-1 / race 1 (BBBD)) GN=PTTG_08055 PE=3 SV=1	10	10	10	59.9	59.9	59.9	21.637	323.31	5937300000	69	2.82426	0.00576166	-4.6758	-2.22245	25.2054	25.3254	25.8069	24.6275	26.4767	26.2708	25.2127	25.9566	24.2744	30.5053	30.7053	30.1919	A0A0C4F4L5	1034732886	OAV87331.1	GMP synthase	Puccinia triticina 1-1 BBBD Race 1	Puccinia triticina 1-1 BBBD Race 1
	+	3.9216	-4.16307	tr|A0A0C4F4L6|A0A0C4F4L6_PUCT1	tr|A0A0C4F4L6|A0A0C4F4L6_PUCT1	tr|A0A0C4F4L6|A0A0C4F4L6_PUCT1 Large subunit ribosomal protein L5e OS=Puccinia triticina (isolate 1-1 / race 1 (BBBD)) GN=PTTG_08056 PE=3 SV=1	9	9	4	25.4	25.4	12.8	54.72	158.34	1346100000	29	4.61368	0.00448227	-4.2003	-2.48665	24.6954	26.4858	26.4616	23.9599	24.5429	24.2576	24.8136	24.7138	24.3631	28.5219	28.557	28.2824	A0A0C4F4L6	1034746178	OAW00162.1	large subunit ribosomal protein L5e	Puccinia triticina 1-1 BBBD Race 1	Puccinia triticina 1-1 BBBD Race 1
	+	3.11937	-3.65049	tr|A0A0C4F4Y8|A0A0C4F4Y8_PUCT1	tr|A0A0C4F4Y8|A0A0C4F4Y8_PUCT1	tr|A0A0C4F4Y8|A0A0C4F4Y8_PUCT1 Nascent polypeptide-associated complex subunit beta OS=Puccinia triticina (isolate 1-1 / race 1 (BBBD)) GN=PTTG_08180 PE=3 SV=1	11	11	4	30.1	30.1	7.8	59.194	104.86	3376900000	36	3.93527	0.00427027	-4.37598	-2.44146	25.4879	25.6621	25.297	25.1536	26.0105	25.1232	24.6231	25.8552	25.194	29.8474	29.7478	29.8201	A0A0C4F4Y8	331228121	XP_003326728.1	nascent polypeptide-associated complex subunit beta	Puccinia graminis f. sp. tritici CRL 75-36-700-3	Puccinia graminis f. sp. tritici CRL 75-36-700-3
	+	2.25967	-2.41684	tr|A0A0C4F552|A0A0C4F552_PUCT1	tr|A0A0C4F552|A0A0C4F552_PUCT1	tr|A0A0C4F552|A0A0C4F552_PUCT1 Uncharacterized protein OS=Puccinia triticina (isolate 1-1 / race 1 (BBBD)) GN=PTTG_08249 PE=3 SV=1	6	6	6	23.7	23.7	23.7	33.117	13.384	1312600000	12	3.48368	0.0114079	-2.895	-1.65228	24.1134	25.6799	24.796	25.1644	25.7774	25.4906	25.6851	24.1349	24.7339	28.6879	28.3631	28.0665	A0A0C4F552	403164006	XP_003324090.2	aldehyde dehydrogenase (NAD+)	Puccinia graminis f. sp. tritici CRL 75-36-700-3	Puccinia graminis f. sp. tritici CRL 75-36-700-3
	+	4.44761	-6.75087	tr|A0A0C4F596|A0A0C4F596_PUCT1;tr|A0A180GST9|A0A180GST9_PUCT1;tr|A0A180GV89|A0A180GV89_PUCT1	tr|A0A0C4F596|A0A0C4F596_PUCT1;tr|A0A180GST9|A0A180GST9_PUCT1	tr|A0A0C4F596|A0A0C4F596_PUCT1 Glyceraldehyde-3-phosphate dehydrogenase OS=Puccinia triticina (isolate 1-1 / race 1 (BBBD)) PE=3 SV=1;tr|A0A180GST9|A0A180GST9_PUCT1 Glyceraldehyde-3-phosphate dehydrogenase OS=Puccinia triticina (isolate 1-1 / race 1 (BBBD)	10	10	10	23.7	23.7	23.7	61.003	61.217	1502700000	35	3.11792	0.00772477	-3.92986	-2.04121	26.0935	26.0625	25.4316	25.0998	24.6836	24.0033	24.9506	26.0214	24.8206	29.082	28.3082	28.1859	A0A0C4F596	1034741798	OAV95805.1	glyceraldehyde-3-phosphate dehydrogenase	Puccinia triticina 1-1 BBBD Race 1	Puccinia triticina 1-1 BBBD Race 1
	+	1.84252	-3.17461	tr|A0A0C4F5D7|A0A0C4F5D7_PUCT1;tr|A0A180GNV8|A0A180GNV8_PUCT1	tr|A0A0C4F5D7|A0A0C4F5D7_PUCT1;tr|A0A180GNV8|A0A180GNV8_PUCT1	tr|A0A0C4F5D7|A0A0C4F5D7_PUCT1 Coatomer subunit alpha OS=Puccinia triticina (isolate 1-1 / race 1 (BBBD)) PE=4 SV=1;tr|A0A180GNV8|A0A180GNV8_PUCT1 Coatomer subunit alpha OS=Puccinia triticina (isolate 1-1 / race 1 (BBBD)) GN=PTTG_08336 PE=4 SV=1	9	9	9	46.5	46.5	46.5	33.588	192.14	4269300000	34	3.9216	0.00536585	-4.16307	-2.33832	25.5231	24.1056	24.5738	26.325	25.389	25.9677	26.1993	25.0385	24.26	30.1306	29.9271	30.1132	A0A0C4F5D7	1034739966	OAV93992.1	coatomer protein complex, subunit alpha (xenin)	Puccinia triticina 1-1 BBBD Race 1	Puccinia triticina 1-1 BBBD Race 1
	+	3.54788	-5.39686	tr|A0A0C4F5H5|A0A0C4F5H5_PUCT1	tr|A0A0C4F5H5|A0A0C4F5H5_PUCT1	tr|A0A0C4F5H5|A0A0C4F5H5_PUCT1 Uncharacterized protein OS=Puccinia triticina (isolate 1-1 / race 1 (BBBD)) GN=PTTG_08374 PE=4 SV=1	6	6	6	43	43	43	19.118	216.14	2322500000	29	3.11937	0.00849383	-3.65049	-1.9267	24.6112	26.1736	25.0735	25.1097	25.8976	25.0728	26.0602	25.865	25.5581	29.3485	28.4359	29.2472	A0A0C4F5H5	403165403	XP_003890053.1	dUTP pyrophosphatase	Puccinia graminis f. sp. tritici CRL 75-36-700-3	Puccinia graminis f. sp. tritici CRL 75-36-700-3
	+	1.81491	-4.70313	tr|A0A0C4F5Q3|A0A0C4F5Q3_PUCT1	tr|A0A0C4F5Q3|A0A0C4F5Q3_PUCT1	tr|A0A0C4F5Q3|A0A0C4F5Q3_PUCT1 Uncharacterized protein OS=Puccinia triticina (isolate 1-1 / race 1 (BBBD)) GN=PTTG_08454 PE=4 SV=1	9	9	9	24.9	24.9	24.9	56.635	36.116	609600000	17	2.25967	0.0257235	-2.41684	-1.24368	25.8852	25.022	25.3511	25.1196	25.345	24.0409	23.7937	24.9472	24.5858	26.9565	27.5952	27.2043	A0A0C4F5Q3	31087954	AAP42832.1	chitinase	Puccinia triticina	Puccinia triticina
	+	2.6802	-5.88801	tr|A0A0C4F5U7|A0A0C4F5U7_PUCT1	tr|A0A0C4F5U7|A0A0C4F5U7_PUCT1	tr|A0A0C4F5U7|A0A0C4F5U7_PUCT1 FK506-binding protein OS=Puccinia triticina (isolate 1-1 / race 1 (BBBD)) GN=PTTG_08501 PE=3 SV=1	13	12	12	51.8	49.7	49.7	35.546	305.5	17275000000	101	4.44761	0	-6.75087	-3.6795	24.0089	25.7738	25.4994	25.411	24.8648	25.7053	25.9723	23.4531	24.664	31.7188	32.4972	32.0177	A0A0C4F5U7	331229858	XP_003327594.1	peptidylprolyl isomerase	Puccinia graminis f. sp. tritici CRL 75-36-700-3	Puccinia graminis f. sp. tritici CRL 75-36-700-3
	+	3.62644	-5.77732	tr|A0A0C4F619|A0A0C4F619_PUCT1;tr|A0A180H0V9|A0A180H0V9_PUCT1	tr|A0A0C4F619|A0A0C4F619_PUCT1;tr|A0A180H0V9|A0A180H0V9_PUCT1	tr|A0A0C4F619|A0A0C4F619_PUCT1 Uncharacterized protein OS=Puccinia triticina (isolate 1-1 / race 1 (BBBD)) PE=3 SV=1;tr|A0A180H0V9|A0A180H0V9_PUCT1 Uncharacterized protein OS=Puccinia triticina (isolate 1-1 / race 1 (BBBD)) GN=PTTG_08574 PE=3 SV=1	12	12	12	12.4	12.4	12.4	131.1	69.245	1044600000	20	1.84252	0.0183467	-3.17461	-1.40053	25.4644	26.1751	24.5714	23.3508	25.8443	25.1524	25.46	25.2511	25.756	28.3327	27.7957	27.7429	A0A0C4F619	1021816616	KZP05649.1	acid protease	Fibularhizoctonia sp. CBS 109695	Fibularhizoctonia sp. CBS 109695
	+	3.54493	-2.09774	tr|A0A0C4F644|A0A0C4F644_PUCT1;tr|A0A0C4F8T3|A0A0C4F8T3_PUCT1;A0A1D5ZGB2;A0A1D6A1W2;A0A1D5ZGB1;A0A1D5YST6	tr|A0A0C4F644|A0A0C4F644_PUCT1;tr|A0A0C4F8T3|A0A0C4F8T3_PUCT1	tr|A0A0C4F644|A0A0C4F644_PUCT1 Guanylate kinase OS=Puccinia triticina (isolate 1-1 / race 1 (BBBD)) GN=PTTG_08605 PE=4 SV=1;tr|A0A0C4F8T3|A0A0C4F8T3_PUCT1 Uncharacterized protein OS=Puccinia triticina (isolate 1-1 / race 1 (BBBD)) PE=4 SV=1	8	8	8	66.7	66.7	66.7	16.057	133.85	6174500000	57	3.54788	0.00274747	-5.39686	-2.76402	25.4004	24.0682	25.1081	25.1486	24.5363	26.071	24.5438	24.8477	26.1863	30.496	30.7329	30.7177	A0A0C4F644	1034739914	OAV93941.1	guanylate kinase	Puccinia triticina 1-1 BBBD Race 1	Puccinia triticina 1-1 BBBD Race 1
	+	3.1588	-2.97465	tr|A0A180GCI8|A0A180GCI8_PUCT1;tr|A0A0C4F692|A0A0C4F692_PUCT1	tr|A0A180GCI8|A0A180GCI8_PUCT1;tr|A0A0C4F692|A0A0C4F692_PUCT1	tr|A0A180GCI8|A0A180GCI8_PUCT1 Uncharacterized protein OS=Puccinia triticina (isolate 1-1 / race 1 (BBBD)) GN=PTTG_08656 PE=4 SV=1;tr|A0A0C4F692|A0A0C4F692_PUCT1 Uncharacterized protein OS=Puccinia triticina (isolate 1-1 / race 1 (BBBD)) PE=4 SV=1	9	9	9	25.7	25.7	25.7	46.865	56.202	3199100000	35	1.81491	0.0104	-4.70313	-1.76968	25.7717	25.7999	25.9863	23.6153	27.2541	23.9942	25.8175	25.5362	24.833	29.5377	29.8042	29.6312	A0A180GCI8	554904670	ESK86866.1	translation initiation factor	Moniliophthora roreri;Moniliophthora roreri MCA 2997	Moniliophthora roreri;Moniliophthora roreri MCA 2997
	+	2.61171	-3.63436	tr|A0A0C4F6G6|A0A0C4F6G6_PUCT1	tr|A0A0C4F6G6|A0A0C4F6G6_PUCT1	tr|A0A0C4F6G6|A0A0C4F6G6_PUCT1 Uncharacterized protein OS=Puccinia triticina (isolate 1-1 / race 1 (BBBD)) GN=PTTG_08733 PE=4 SV=1	5	5	5	17.6	17.6	17.6	40.006	27.792	428160000	13	2.64867	0.0397137	-2.01996	-1.1282	25.784	25.6937	26.4586	25.1812	24.3322	25.0757	24.9698	25.0098	25.6212	26.9388	27.0465	26.6638	A0A0C4F6G6	403170182	XP_003889576.1	26S proteasome regulatory subunit N1	Puccinia graminis f. sp. tritici CRL 75-36-700-3	Puccinia graminis f. sp. tritici CRL 75-36-700-3
	+	4.69405	-7.23229	tr|A0A0C4F6M4|A0A0C4F6M4_PUCT1	tr|A0A0C4F6M4|A0A0C4F6M4_PUCT1	tr|A0A0C4F6M4|A0A0C4F6M4_PUCT1 Uncharacterized protein OS=Puccinia triticina (isolate 1-1 / race 1 (BBBD)) GN=PTTG_08794 PE=4 SV=1	13	13	13	38.9	38.9	38.9	46.969	322.83	15270000000	108	2.6802	0.00482443	-5.88801	-2.52668	26.6809	25.8699	25.3943	24.4868	27.2395	26.3945	25.05	24.8159	24.5506	32.2245	31.8986	31.6618	A0A0C4F6M4	1034738035	OAV92087.1	hypothetical protein PTTG_08794	Puccinia triticina 1-1 BBBD Race 1	Puccinia triticina 1-1 BBBD Race 1
	+	4.36345	-3.3229	tr|A0A0C4F7L0|A0A0C4F7L0_PUCT1	tr|A0A0C4F7L0|A0A0C4F7L0_PUCT1	tr|A0A0C4F7L0|A0A0C4F7L0_PUCT1 Phosphoacetylglucosamine mutase OS=Puccinia triticina (isolate 1-1 / race 1 (BBBD)) GN=PTTG_09144 PE=3 SV=1	17	17	17	70.6	70.6	70.6	33.136	211.27	7289900000	72	3.62644	0.00237037	-5.77732	-2.94378	25.3535	24.7206	26.9775	25.9159	24.6473	24.6762	25.0236	24.6634	25.3119	30.6752	31.2522	30.6439	A0A0C4F7L0	331221599	XP_003323474.1	phosphoacetylglucosamine mutase	Puccinia graminis f. sp. tritici CRL 75-36-700-3	Puccinia graminis f. sp. tritici CRL 75-36-700-3
	+	4.00153	-4.298	tr|A0A180GV23|A0A180GV23_PUCT1;tr|A0A0C4F7L3|A0A0C4F7L3_PUCT1	tr|A0A180GV23|A0A180GV23_PUCT1;tr|A0A0C4F7L3|A0A0C4F7L3_PUCT1	tr|A0A180GV23|A0A180GV23_PUCT1 Protein mago nashi OS=Puccinia triticina (isolate 1-1 / race 1 (BBBD)) GN=PTTG_09147 PE=4 SV=1;tr|A0A0C4F7L3|A0A0C4F7L3_PUCT1 Uncharacterized protein OS=Puccinia triticina (isolate 1-1 / race 1 (BBBD)) PE=4 SV=1	6	6	6	27.1	27.1	27.1	28.167	8.6623	720570000	15	3.54493	0.0255406	-2.09774	-1.25148	26.7046	25.4912	26.8752	25.1477	25.6649	25.5685	25.4799	26.0892	24.828	27.7106	27.4745	27.4892	A0A180GV23	331221577	XP_003323463.1	protein mago nashi	Puccinia coronata var. avenae f. sp. avenae;Puccinia graminis f. sp. tritici CRL 75-36-700-3;Puccinia triticina 1-1 BBBD Race 1	Puccinia coronata var. avenae f. sp. avenae;Puccinia graminis f. sp. tritici CRL 75-36-700-3;Puccinia triticina 1-1 BBBD Race 1
	+	2.19956	-3.0095	tr|A0A0C4F7P6|A0A0C4F7P6_PUCT1;tr|A0A180G5Z4|A0A180G5Z4_PUCT1	tr|A0A0C4F7P6|A0A0C4F7P6_PUCT1;tr|A0A180G5Z4|A0A180G5Z4_PUCT1	tr|A0A0C4F7P6|A0A0C4F7P6_PUCT1 Uncharacterized protein OS=Puccinia triticina (isolate 1-1 / race 1 (BBBD)) PE=3 SV=1;tr|A0A180G5Z4|A0A180G5Z4_PUCT1 T-complex protein 1, theta subunit OS=Puccinia triticina (isolate 1-1 / race 1 (BBBD)) GN=PTTG_09180 PE=3 SV	4	4	4	15.7	15.7	15.7	41.412	55.697	1002200000	12	3.1588	0.012026	-2.97465	-1.63971	25.4911	24.4321	25.1266	24.8142	25.1966	25.3258	25.1234	25.506	23.6059	27.838	28.6341	27.7884	A0A0C4F7P6	1034733639	OAV87879.1	T-complex protein 1, theta subunit	Puccinia triticina 1-1 BBBD Race 1	Puccinia triticina 1-1 BBBD Race 1
	+	1.73953	-2.37718	tr|A0A180H104|A0A180H104_PUCT1;tr|A0A0C4F7R3|A0A0C4F7R3_PUCT1	tr|A0A180H104|A0A180H104_PUCT1;tr|A0A0C4F7R3|A0A0C4F7R3_PUCT1	tr|A0A180H104|A0A180H104_PUCT1 Serine/threonine-protein phosphatase OS=Puccinia triticina (isolate 1-1 / race 1 (BBBD)) GN=PTTG_09197 PE=3 SV=1;tr|A0A0C4F7R3|A0A0C4F7R3_PUCT1 Serine/threonine-protein phosphatase OS=Puccinia triticina (isolate 1-1 / race 1	16	16	16	24.4	24.4	24.4	114.03	66.119	1810200000	37	2.61171	0.0105891	-3.63436	-1.7863	25.8	24.2091	25.2774	25.2638	26.1383	24.3106	24.4133	25.0607	24.6897	29.0162	28.8781	28.7215	A0A180H104	1034744739	OAV98727.1	serine/threonine-protein phosphatase PP1	Puccinia triticina 1-1 BBBD Race 1	Puccinia triticina 1-1 BBBD Race 1
	+	2.90999	-4.526	tr|A0A0C4F7Z5|A0A0C4F7Z5_PUCT1;tr|A0A180GM64|A0A180GM64_PUCT1	tr|A0A0C4F7Z5|A0A0C4F7Z5_PUCT1;tr|A0A180GM64|A0A180GM64_PUCT1	tr|A0A0C4F7Z5|A0A0C4F7Z5_PUCT1 Uncharacterized protein OS=Puccinia triticina (isolate 1-1 / race 1 (BBBD)) PE=3 SV=1;tr|A0A180GM64|A0A180GM64_PUCT1 Uncharacterized protein OS=Puccinia triticina (isolate 1-1 / race 1 (BBBD)) GN=PTTG_09282 PE=3 SV=1	3	3	1	29.9	29.9	12.7	14.539	261.99	21537000000	118	4.69405	0	-7.23229	-3.99385	25.1496	24.8153	26.2115	25.4533	25.1891	24.5558	27.6374	24.5038	25.4391	32.5573	32.0049	32.3329	A0A0C4F7Z5	647398397	CDR42256.1	RHTO0S06e11760g1_1	Rhodotorula toruloides	Rhodotorula toruloides
	+	4.6254	-6.49472	tr|A0A0C4F869|A0A0C4F869_PUCT1	tr|A0A0C4F869|A0A0C4F869_PUCT1	tr|A0A0C4F869|A0A0C4F869_PUCT1 Translationally-controlled tumor protein OS=Puccinia triticina (isolate 1-1 / race 1 (BBBD)) GN=PTTG_09356 PE=3 SV=1	9	9	9	20.6	20.6	20.6	57.845	37.549	1321600000	18	4.36345	0.00839655	-3.3229	-1.98618	25.2668	25.458	23.7176	24.7544	25.348	25.0913	25.3739	25.7483	23.9955	28.3993	28.3484	28.4147	A0A0C4F869	1034735074	OAV89193.1	translationally-controlled tumor protein	Puccinia triticina 1-1 BBBD Race 1	Puccinia triticina 1-1 BBBD Race 1
	+	3.89839	-4.09782	tr|A0A0C4F881|A0A0C4F881_PUCT1	tr|A0A0C4F881|A0A0C4F881_PUCT1	tr|A0A0C4F881|A0A0C4F881_PUCT1 Pyridoxine biosynthesis protein PDX1 OS=Puccinia triticina (isolate 1-1 / race 1 (BBBD)) GN=PTTG_09373 PE=3 SV=1	8	8	8	58.4	58.4	58.4	17.504	52.568	1572600000	24	4.00153	0.0041039	-4.298	-2.4197	23.4337	24.6869	24.3978	24.719	24.4115	24.0674	24.8454	24.8717	23.9504	28.8622	28.9347	28.295	A0A0C4F881	1034734777	OAV88907.1	pyridoxine biosynthesis protein PDX1	Puccinia triticina 1-1 BBBD Race 1	Puccinia triticina 1-1 BBBD Race 1
	+	2.83463	-5.70356	tr|A0A0C4F8C0|A0A0C4F8C0_PUCT1	tr|A0A0C4F8C0|A0A0C4F8C0_PUCT1	tr|A0A0C4F8C0|A0A0C4F8C0_PUCT1 Citrate synthase OS=Puccinia triticina (isolate 1-1 / race 1 (BBBD)) GN=PTTG_09412 PE=3 SV=1	6	6	6	13.8	13.8	13.8	58.046	55.401	1491800000	16	2.19956	0.0161232	-3.0095	-1.45126	23.6683	25.2532	25.5342	24.601	26.4909	25.7042	25.5248	24.0277	23.499	28.6777	28.2862	28.8606	A0A0C4F8C0	331245381	XP_003335327.1	citrate synthase	Puccinia graminis f. sp. tritici CRL 75-36-700-3	Puccinia graminis f. sp. tritici CRL 75-36-700-3
	+	5.41264	-7.05008	tr|A0A0C4F8L8|A0A0C4F8L8_PUCT1;tr|A0A180GZG6|A0A180GZG6_PUCT1	tr|A0A0C4F8L8|A0A0C4F8L8_PUCT1;tr|A0A180GZG6|A0A180GZG6_PUCT1	tr|A0A0C4F8L8|A0A0C4F8L8_PUCT1 Uncharacterized protein OS=Puccinia triticina (isolate 1-1 / race 1 (BBBD)) PE=4 SV=1;tr|A0A180GZG6|A0A180GZG6_PUCT1 Uncharacterized protein OS=Puccinia triticina (isolate 1-1 / race 1 (BBBD)) GN=PTTG_09516 PE=4 SV=1	5	5	4	21	21	16.8	38.254	39.64	574040000	18	1.73953	0.0401955	-2.37718	-1.12313	25.3491	25.3481	26.4086	23.8328	25.9632	24.7709	24.0166	25.1982	25.1379	27.2484	27.2092	27.2407	A0A0C4F8L8	1405420462	SDA06229.1	BZ3501_MvSof-1269-A2-R1_Chr10-1g02341	Microbotryum saponariae	Microbotryum saponariae
	+	3.04687	-2.9527	tr|A0A0C4F8T8|A0A0C4F8T8_PUCT1	tr|A0A0C4F8T8|A0A0C4F8T8_PUCT1	tr|A0A0C4F8T8|A0A0C4F8T8_PUCT1 Uncharacterized protein OS=Puccinia triticina (isolate 1-1 / race 1 (BBBD)) GN=PTTG_09594 PE=4 SV=1	13	13	13	41.4	41.4	41.4	46.937	79.805	5252100000	75	2.90999	0.00573196	-4.526	-2.20248	24.9783	24.6883	25.0009	26.5147	25.3215	25.5263	25.7078	25.7795	24.684	30.847	29.4959	30.5975	A0A0C4F8T8	331220978	XP_003323164.1	high mobility group protein B1	Puccinia graminis f. sp. tritici CRL 75-36-700-3	Puccinia graminis f. sp. tritici CRL 75-36-700-3
	+	6.15084	-8.37336	tr|A0A0C4F9B4|A0A0C4F9B4_PUCT1	tr|A0A0C4F9B4|A0A0C4F9B4_PUCT1	tr|A0A0C4F9B4|A0A0C4F9B4_PUCT1 Uncharacterized protein OS=Puccinia triticina (isolate 1-1 / race 1 (BBBD)) GN=PTTG_09784 PE=4 SV=1	9	9	9	63.3	63.3	63.3	18.505	265.57	18445000000	111	4.6254	0	-6.49472	-3.62737	24.6566	25.4835	25.3846	26.0896	25.338	25.5051	24.4409	26.247	24.815	32.0279	32.4914	31.8977	A0A0C4F9B4	1023278350	KZT73199.1	Thiamin diphosphate-binding protein	Daedalea quercina L-15889	Daedalea quercina L-15889
	+	3.30432	-5.20482	tr|A0A0C4F9E4|A0A0C4F9E4_PUCT1	tr|A0A0C4F9E4|A0A0C4F9E4_PUCT1	tr|A0A0C4F9E4|A0A0C4F9E4_PUCT1 Uncharacterized protein OS=Puccinia triticina (isolate 1-1 / race 1 (BBBD)) GN=PTTG_09820 PE=4 SV=1	11	8	8	43.3	34.5	34.5	34.631	28.316	2930000000	32	3.89839	0.00508671	-4.09782	-2.30248	24.9523	25.861	25.0199	25.6077	25.0518	26.0059	23.8562	25.4203	24.0484	29.5737	29.6723	29.7128	A0A0C4F9E4	331217081	XP_003321219.1	60S ribosomal protein L7	Puccinia graminis f. sp. tritici CRL 75-36-700-3	Puccinia graminis f. sp. tritici CRL 75-36-700-3
	+	2.40482	-2.6791	tr|A0A0C4FAR5|A0A0C4FAR5_PUCT1;tr|A0A180GES0|A0A180GES0_PUCT1	tr|A0A0C4FAR5|A0A0C4FAR5_PUCT1;tr|A0A180GES0|A0A180GES0_PUCT1	tr|A0A0C4FAR5|A0A0C4FAR5_PUCT1 Uncharacterized protein OS=Puccinia triticina (isolate 1-1 / race 1 (BBBD)) PE=3 SV=1;tr|A0A180GES0|A0A180GES0_PUCT1 Geranyltranstransferase OS=Puccinia triticina (isolate 1-1 / race 1 (BBBD)) GN=PTTG_10308 PE=3 SV=1	15	15	15	44	44	44	51.561	311.15	11595000000	151	2.83463	0.004128	-5.70356	-2.55536	25.4172	25.1467	27.3323	24.2322	26.1468	26.612	25.1062	24.7544	24.5258	31.289	31.5156	31.2972	A0A0C4FAR5	1034737088	OAV91155.1	geranyltranstransferase	Puccinia triticina 1-1 BBBD Race 1	Puccinia triticina 1-1 BBBD Race 1
	+	1.89488	-2.27663	tr|A0A0C4FBG5|A0A0C4FBG5_PUCT1;tr|A0A180GZC3|A0A180GZC3_PUCT1	tr|A0A0C4FBG5|A0A0C4FBG5_PUCT1;tr|A0A180GZC3|A0A180GZC3_PUCT1	tr|A0A0C4FBG5|A0A0C4FBG5_PUCT1 Uncharacterized protein OS=Puccinia triticina (isolate 1-1 / race 1 (BBBD)) PE=3 SV=1;tr|A0A180GZC3|A0A180GZC3_PUCT1 UDP-glucose 4-epimerase OS=Puccinia triticina (isolate 1-1 / race 1 (BBBD)) GN=PTTG_10563 PE=3 SV=1	15	15	15	35.8	35.8	35.8	46.16	323.31	13985000000	124	5.41264	0	-7.05008	-4.14705	25.9174	25.4599	26.3296	24.4895	24.6354	25.1325	25.2482	25.5909	24.1924	31.8722	31.7151	31.8204	A0A0C4FBG5	1034744206	OAV98196.1	UDP-glucose 4-epimerase	Puccinia triticina 1-1 BBBD Race 1	Puccinia triticina 1-1 BBBD Race 1
	+	2.6095	-2.98017	tr|A0A0C4FBU2|A0A0C4FBU2_PUCT1	tr|A0A0C4FBU2|A0A0C4FBU2_PUCT1	tr|A0A0C4FBU2|A0A0C4FBU2_PUCT1 Uncharacterized protein OS=Puccinia triticina (isolate 1-1 / race 1 (BBBD)) GN=PTTG_10691 PE=4 SV=1	3	3	3	29	29	29	12.485	26.993	1253900000	12	3.04687	0.0126835	-2.9527	-1.6105	24.7386	24.8707	26.2418	24.9018	25.8443	25.6951	25.2891	24.6919	25.0959	28.3313	28.7468	28.2212	A0A0C4FBU2	1034733621	OAV87865.1	hypothetical protein PTTG_10691	Puccinia triticina 1-1 BBBD Race 1	Puccinia triticina 1-1 BBBD Race 1
	+	5.55656	-9.65249	tr|A0A180FX95|A0A180FX95_PUCT1	tr|A0A180FX95|A0A180FX95_PUCT1	tr|A0A180FX95|A0A180FX95_PUCT1 Uncharacterized protein OS=Puccinia triticina (isolate 1-1 / race 1 (BBBD)) GN=PTTG_12725 PE=4 SV=1	29	29	29	50.6	50.6	50.6	69.861	323.31	51743000000	362	6.15084	0	-8.37336	-5.05881	25.6697	24.6112	25.595	25.5289	25.342	25.0158	25.0694	25.7898	25.5225	33.5951	33.7331	33.6785	A0A180FX95	1034722800	OAV85011.1	hypothetical protein PTTG_12725	Puccinia triticina 1-1 BBBD Race 1	Puccinia triticina 1-1 BBBD Race 1
	+	4.94909	-7.58918	tr|A0A180G1J2|A0A180G1J2_PUCT1;tr|A0A0C4ENY3|A0A0C4ENY3_PUCT1;tr|A0A0C4FCG7|A0A0C4FCG7_PUCT1	tr|A0A180G1J2|A0A180G1J2_PUCT1;tr|A0A0C4ENY3|A0A0C4ENY3_PUCT1	tr|A0A180G1J2|A0A180G1J2_PUCT1 Transaldolase (Fragment) OS=Puccinia triticina (isolate 1-1 / race 1 (BBBD)) GN=PTTG_29878 PE=3 SV=1;tr|A0A0C4ENY3|A0A0C4ENY3_PUCT1 Uncharacterized protein OS=Puccinia triticina (isolate 1-1 / race 1 (BBBD)) PE=4 SV=1	9	9	9	55.2	55.2	55.2	28.816	123.96	3537400000	49	3.30432	0.00444828	-5.20482	-2.59718	25.5138	24.8947	26.3855	23.9473	25.3446	24.4904	25.38	23.9951	25.1021	30.2055	29.9724	29.2188	A0A180G1J2	1034731412	OAV86484.1	transaldolase, partial	Puccinia triticina 1-1 BBBD Race 1	Puccinia triticina 1-1 BBBD Race 1
	+	5.00421	-7.07404	tr|A0A180G1R1|A0A180G1R1_PUCT1;tr|A0A0C4ESP2|A0A0C4ESP2_PUCT1	tr|A0A180G1R1|A0A180G1R1_PUCT1;tr|A0A0C4ESP2|A0A0C4ESP2_PUCT1	tr|A0A180G1R1|A0A180G1R1_PUCT1 Adenosylhomocysteinase OS=Puccinia triticina (isolate 1-1 / race 1 (BBBD)) GN=PTTG_03821 PE=3 SV=1;tr|A0A0C4ESP2|A0A0C4ESP2_PUCT1 Adenosylhomocysteinase OS=Puccinia triticina (isolate 1-1 / race 1 (BBBD)) PE=3 SV=1	6	6	6	23.5	23.5	23.5	39.302	45.662	1283400000	29	2.40482	0.018587	-2.6791	-1.37515	25.2917	25.6729	26.2077	25.7593	26.3094	24.827	25.727	23.8131	24.3554	28.4567	28.3969	28.0794	A0A180G1R1	1034731526	OAV86540.1	adenosylhomocysteinase	Puccinia triticina 1-1 BBBD Race 1	Puccinia triticina 1-1 BBBD Race 1
	+	1.78266	-2.49813	tr|A0A180G2E4|A0A180G2E4_PUCT1;tr|A0A0C4EJU4|A0A0C4EJU4_PUCT1;tr|A0A180H3R3|A0A180H3R3_PUCT1;tr|A0A180GE46|A0A180GE46_PUCT1	tr|A0A180G2E4|A0A180G2E4_PUCT1	tr|A0A180G2E4|A0A180G2E4_PUCT1 Aspartyl-tRNA synthetase OS=Puccinia triticina (isolate 1-1 / race 1 (BBBD)) GN=PTTG_12145 PE=3 SV=1	9	9	9	42.8	42.8	42.8	38.596	34.339	1071900000	18	1.89488	0.0406341	-2.27663	-1.12117	25.5038	25.0057	25.4991	25.4203	26.6958	25.1173	24.0504	24.7461	25.231	28.418	27.98	27.6653	A0A180G2E4	1034731637	OAV86592.1	aspartyl-tRNA synthetase	Puccinia triticina 1-1 BBBD Race 1	Puccinia triticina 1-1 BBBD Race 1
	+	3.17161	-2.55252	tr|A0A180G2J0|A0A180G2J0_PUCT1;tr|A0A0C4F977|A0A0C4F977_PUCT1	tr|A0A180G2J0|A0A180G2J0_PUCT1;tr|A0A0C4F977|A0A0C4F977_PUCT1	tr|A0A180G2J0|A0A180G2J0_PUCT1 Uncharacterized protein OS=Puccinia triticina (isolate 1-1 / race 1 (BBBD)) GN=PTTG_09745 PE=4 SV=1;tr|A0A0C4F977|A0A0C4F977_PUCT1 Uncharacterized protein OS=Puccinia triticina (isolate 1-1 / race 1 (BBBD)) PE=4 SV=1	3	1	1	29.9	12.7	12.7	14.522	220.68	1340900000	24	2.6095	0.0131138	-2.98017	-1.537	25.3151	24.2055	24.5095	24.5674	25.8303	25.1586	24.6441	25.4614	24.5606	27.7173	28.5571	28.2223	A0A180G2J0	403168995	XP_003328555.2	aminotransferase	Puccinia graminis f. sp. tritici CRL 75-36-700-3	Puccinia graminis f. sp. tritici CRL 75-36-700-3
	+	3.97384	-3.07331	tr|A0A180G2U7|A0A180G2U7_PUCT1;tr|A0A0C4EZ67|A0A0C4EZ67_PUCT1;tr|A0A0C4F8R4|A0A0C4F8R4_PUCT1;tr|A0A0C4F1K8|A0A0C4F1K8_PUCT1	tr|A0A180G2U7|A0A180G2U7_PUCT1;tr|A0A0C4EZ67|A0A0C4EZ67_PUCT1;tr|A0A0C4F8R4|A0A0C4F8R4_PUCT1	tr|A0A180G2U7|A0A180G2U7_PUCT1 Uncharacterized protein OS=Puccinia triticina (isolate 1-1 / race 1 (BBBD)) GN=PTTG_09566 PE=3 SV=1;tr|A0A0C4EZ67|A0A0C4EZ67_PUCT1 Uncharacterized protein OS=Puccinia triticina (isolate 1-1 / race 1 (BBBD)) PE=3 SV=1;tr|A0A0C	6	6	5	32.3	32.3	26.8	13.919	130.72	86681000000	119	5.55656	0	-9.65249	-5.50931	24.196	24.5356	26.1619	25.2083	24.7958	24.424	29.3249	29.9646	28.1388	34.4154	34.6722	34.298	A0A180G2U7	403159882	XP_003320436.2	ubiquitin thiolesterase	Puccinia graminis f. sp. tritici CRL 75-36-700-3	Puccinia graminis f. sp. tritici CRL 75-36-700-3
	+	3.7649	-6.11396	tr|A0A180G327|A0A180G327_PUCT1;tr|A0A0C4EPB2|A0A0C4EPB2_PUCT1	tr|A0A180G327|A0A180G327_PUCT1;tr|A0A0C4EPB2|A0A0C4EPB2_PUCT1	tr|A0A180G327|A0A180G327_PUCT1 Triosephosphate isomerase OS=Puccinia triticina (isolate 1-1 / race 1 (BBBD)) GN=PTTG_02613 PE=3 SV=1;tr|A0A0C4EPB2|A0A0C4EPB2_PUCT1 Triosephosphate isomerase OS=Puccinia triticina (isolate 1-1 / race 1 (BBBD)) PE=3 SV=1	18	18	18	46	46	46	38.772	323.31	30238000000	202	4.94909	0	-7.58918	-4.26015	25.6504	25.9962	25.3252	25.2662	25.8041	24.9149	23.8924	26.1621	24.3498	32.9723	33.0767	32.7036	A0A180G327	1034732100	OAV86849.1	triosephosphate isomerase	Puccinia triticina 1-1 BBBD Race 1	Puccinia triticina 1-1 BBBD Race 1
	+	3.3834	-2.62886	tr|A0A180G334|A0A180G334_PUCT1;tr|A0A0C4F283|A0A0C4F283_PUCT1	tr|A0A180G334|A0A180G334_PUCT1;tr|A0A0C4F283|A0A0C4F283_PUCT1	tr|A0A180G334|A0A180G334_PUCT1 Uncharacterized protein OS=Puccinia triticina (isolate 1-1 / race 1 (BBBD)) GN=PTTG_07204 PE=4 SV=1;tr|A0A0C4F283|A0A0C4F283_PUCT1 Uncharacterized protein OS=Puccinia triticina (isolate 1-1 / race 1 (BBBD)) PE=4 SV=1	20	20	20	48.4	48.4	48.4	47.054	323.31	81293000000	236	5.00421	0	-7.07404	-4.03286	24.9002	25.4183	25.1902	26.5874	26.1427	26.3069	24.9863	24.6697	24.604	33.8491	33.2745	33.1355	A0A180G334	1034732539	OAV87106.1	hypothetical protein PTTG_07204	Puccinia triticina 1-1 BBBD Race 1	Puccinia triticina 1-1 BBBD Race 1
	+	2.88962	-4.5407	tr|A0A180G360|A0A180G360_PUCT1;tr|A0A0C4F0G9|A0A0C4F0G9_PUCT1	tr|A0A180G360|A0A180G360_PUCT1;tr|A0A0C4F0G9|A0A0C4F0G9_PUCT1	tr|A0A180G360|A0A180G360_PUCT1 60S ribosomal protein L11 OS=Puccinia triticina (isolate 1-1 / race 1 (BBBD)) GN=PTTG_06586 PE=3 SV=1;tr|A0A0C4F0G9|A0A0C4F0G9_PUCT1 Uncharacterized protein OS=Puccinia triticina (isolate 1-1 / race 1 (BBBD)) PE=3 SV=1	6	5	5	15.2	13.4	13.4	62.759	23.322	794600000	9	1.78266	0.0335332	-2.49813	-1.17352	24.514	24.9063	25.6797	25.795	24.8424	24.5896	25.3959	24.3745	25.8758	28.4936	27.4978	26.73	A0A180G360	1034732410	OAV87028.1	60S ribosomal protein L11	Puccinia coronata var. avenae f. sp. avenae;Puccinia triticina 1-1 BBBD Race 1	Puccinia coronata var. avenae f. sp. avenae;Puccinia triticina 1-1 BBBD Race 1
	+	4.6103	-4.23382	tr|A0A180G405|A0A180G405_PUCT1;tr|A0A0C4F963|A0A0C4F963_PUCT1	tr|A0A180G405|A0A180G405_PUCT1;tr|A0A0C4F963|A0A0C4F963_PUCT1	tr|A0A180G405|A0A180G405_PUCT1 Uncharacterized protein OS=Puccinia triticina (isolate 1-1 / race 1 (BBBD)) GN=PTTG_09731 PE=4 SV=1;tr|A0A0C4F963|A0A0C4F963_PUCT1 Dihydrolipoamide acetyltransferase component of pyruvate dehydrogenase complex OS=Puccinia tri	8	8	8	18.4	18.4	18.4	51.405	27.418	1143200000	23	3.17161	0.0172111	-2.55252	-1.44414	24.8555	24.9212	25.6237	25.9538	25.3946	25.3941	24.7792	26.5364	24.9409	27.7613	28.4	28.2389	A0A180G405	909605893	KNE96271.1	dihydrolipoyllysine-residue succinyltransferase, E2 component	Puccinia striiformis f. sp. tritici PST-78	Puccinia striiformis f. sp. tritici PST-78
	+	2.80705	-2.4492	tr|A0A180G431|A0A180G431_PUCT1;tr|A0A0C4EVZ4|A0A0C4EVZ4_PUCT1;tr|A0A0C4EJA3|A0A0C4EJA3_PUCT1	tr|A0A180G431|A0A180G431_PUCT1;tr|A0A0C4EVZ4|A0A0C4EVZ4_PUCT1	tr|A0A180G431|A0A180G431_PUCT1 Uncharacterized protein OS=Puccinia triticina (isolate 1-1 / race 1 (BBBD)) GN=PTTG_00821 PE=4 SV=1;tr|A0A0C4EVZ4|A0A0C4EVZ4_PUCT1 Uncharacterized protein OS=Puccinia triticina (isolate 1-1 / race 1 (BBBD)) PE=4 SV=1	13	12	12	18.9	18.2	18.2	128.18	46.42	1178900000	34	3.97384	0.0104328	-3.07331	-1.80703	25.1876	24.9156	26.1605	24.9176	25.0795	25.1913	25.4078	26.6939	25.2401	27.7912	28.1956	28.4215	A0A180G431	403173368	XP_003332445.2	translation initiation factor eIF-2 alpha subunit	Puccinia graminis f. sp. tritici CRL 75-36-700-3	Puccinia graminis f. sp. tritici CRL 75-36-700-3
	+	3.83071	-2.63211	tr|A0A180G4N7|A0A180G4N7_PUCT1	tr|A0A180G4N7|A0A180G4N7_PUCT1	tr|A0A180G4N7|A0A180G4N7_PUCT1 Uncharacterized protein OS=Puccinia triticina (isolate 1-1 / race 1 (BBBD)) GN=PTTG_12514 PE=4 SV=1	12	12	12	65.5	65.5	65.5	27.672	242.32	18203000000	155	3.7649	0.00116923	-6.11396	-3.13328	26.764	28.7248	30.394	25.1244	26.1263	25.9178	27.6871	26.0034	27.3471	32.1666	32.1718	31.1719	A0A180G4N7	1034733236	OAV87568.1	hypothetical protein PTTG_12514	Puccinia triticina 1-1 BBBD Race 1	Puccinia triticina 1-1 BBBD Race 1
	+	2.52863	-2.47533	tr|A0A180G6E0|A0A180G6E0_PUCT1;tr|A0A0C4EL67|A0A0C4EL67_PUCT1	tr|A0A180G6E0|A0A180G6E0_PUCT1;tr|A0A0C4EL67|A0A0C4EL67_PUCT1	tr|A0A180G6E0|A0A180G6E0_PUCT1 Uncharacterized protein OS=Puccinia triticina (isolate 1-1 / race 1 (BBBD)) GN=PTTG_01501 PE=4 SV=1;tr|A0A0C4EL67|A0A0C4EL67_PUCT1 Uncharacterized protein OS=Puccinia triticina (isolate 1-1 / race 1 (BBBD)) PE=4 SV=1	7	7	7	22.7	22.7	22.7	48.03	52.872	1242900000	23	3.3834	0.0144257	-2.62886	-1.50831	24.9731	24.2101	26.0743	25.5244	26.2382	25.592	25.0998	24.9463	25.5537	28.4198	28.5581	28.2632	A0A180G6E0	1022844790	XP_016274812.1	transcription factor (Snd1/p100)	Rhodotorula toruloides;Rhodotorula toruloides NP11	Rhodotorula toruloides;Rhodotorula toruloides NP11
	+	4.87816	-6.76124	tr|A0A180G6E5|A0A180G6E5_PUCT1;tr|A0A0C4F9A0|A0A0C4F9A0_PUCT1;tr|A0A0C4F489|A0A0C4F489_PUCT1;tr|A0A180GLN2|A0A180GLN2_PUCT1	tr|A0A180G6E5|A0A180G6E5_PUCT1;tr|A0A0C4F9A0|A0A0C4F9A0_PUCT1	tr|A0A180G6E5|A0A180G6E5_PUCT1 Uncharacterized protein OS=Puccinia triticina (isolate 1-1 / race 1 (BBBD)) GN=PTTG_29181 PE=3 SV=1;tr|A0A0C4F9A0|A0A0C4F9A0_PUCT1 Uncharacterized protein OS=Puccinia triticina (isolate 1-1 / race 1 (BBBD)) PE=4 SV=1	6	6	6	35.8	35.8	35.8	19.972	45.468	5033000000	24	2.88962	0.00626531	-4.5407	-2.20032	24.969	25.5638	24.5624	24.7419	26.6102	25.7289	24.8082	23.0374	25.209	30.096	30.5589	30.0482	A0A180G6E5	331226164	XP_003325752.1	spermidine synthase	Puccinia graminis f. sp. tritici CRL 75-36-700-3	Puccinia graminis f. sp. tritici CRL 75-36-700-3
	+	6.58293	-4.21701	tr|A0A180G6H2|A0A180G6H2_PUCT1;tr|A0A0C4F001|A0A0C4F001_PUCT1	tr|A0A180G6H2|A0A180G6H2_PUCT1;tr|A0A0C4F001|A0A0C4F001_PUCT1	tr|A0A180G6H2|A0A180G6H2_PUCT1 Uncharacterized protein OS=Puccinia triticina (isolate 1-1 / race 1 (BBBD)) GN=PTTG_06415 PE=4 SV=1;tr|A0A0C4F001|A0A0C4F001_PUCT1 Uncharacterized protein OS=Puccinia triticina (isolate 1-1 / race 1 (BBBD)) PE=4 SV=1	4	4	4	12.3	12.3	12.3	57.498	47.524	1314200000	18	4.6103	0.00457971	-4.23382	-2.5037	26.2416	25.5478	25.3943	24.5938	24.2571	23.9846	24.3282	25.343	25.4911	28.388	28.6433	28.5057	A0A180G6H2	1023247311	KZT43068.1	alpha/beta-hydrolase	Sistotremastrum suecicum HHB10207 ss-3	Sistotremastrum suecicum HHB10207 ss-3
	+	4.04009	-4.69695	tr|A0A180G747|A0A180G747_PUCT1;tr|A0A0C4F2D2|A0A0C4F2D2_PUCT1	tr|A0A180G747|A0A180G747_PUCT1;tr|A0A0C4F2D2|A0A0C4F2D2_PUCT1	tr|A0A180G747|A0A180G747_PUCT1 Nuclear transport factor 2 OS=Puccinia triticina (isolate 1-1 / race 1 (BBBD)) GN=PTTG_07253 PE=4 SV=1;tr|A0A0C4F2D2|A0A0C4F2D2_PUCT1 Uncharacterized protein OS=Puccinia triticina (isolate 1-1 / race 1 (BBBD)) PE=4 SV=1	7	7	7	34.7	34.7	34.7	33.576	24.589	1120000000	18	2.80705	0.0201929	-2.4492	-1.34598	25.4297	24.1122	25.8255	25.9936	25.8982	25.2199	26.4942	24.664	24.947	28.3101	27.7428	28.4064	A0A180G747	1034734282	OAV88440.1	nuclear transport factor 2	Puccinia triticina 1-1 BBBD Race 1	Puccinia triticina 1-1 BBBD Race 1
	+	2.49762	-5.05479	tr|A0A180G7A5|A0A180G7A5_PUCT1	tr|A0A180G7A5|A0A180G7A5_PUCT1	tr|A0A180G7A5|A0A180G7A5_PUCT1 Uncharacterized protein OS=Puccinia triticina (isolate 1-1 / race 1 (BBBD)) GN=PTTG_12625 PE=4 SV=1	3	3	3	31.1	31.1	31.1	14.727	31.932	1503800000	12	3.83071	0.0133537	-2.63211	-1.56028	25.1557	26.2538	26.6775	25.9845	25.9903	25.6312	24.5895	24.799	25.6965	28.2418	28.7409	28.5196	A0A180G7A5	751693072	KIM43056.1	glycoside hydrolase family 131 protein, partial	Hebeloma cylindrosporum h7	Hebeloma cylindrosporum h7
	+	2.92375	-2.53746	tr|A0A180G7D3|A0A180G7D3_PUCT1	tr|A0A180G7D3|A0A180G7D3_PUCT1	tr|A0A180G7D3|A0A180G7D3_PUCT1 Uncharacterized protein OS=Puccinia triticina (isolate 1-1 / race 1 (BBBD)) GN=PTTG_01516 PE=4 SV=1	10	10	10	13.5	13.5	13.5	103.92	17.359	734230000	23	2.52863	0.0203047	-2.47533	-1.31436	24.7641	24.6193	25.7836	25.6977	24.6374	24.9083	24.4795	25.2216	25.0844	27.799	27.7405	27.13	A0A180G7D3	1247167410	PCH41095.1	pyrimidine 5-nucleotidase	Wolfiporia cocos MD-104 SS10	Wolfiporia cocos MD-104 SS10
	+	3.7721	-5.92819	tr|A0A180G7H5|A0A180G7H5_PUCT1;tr|A0A0C4EVB3|A0A0C4EVB3_PUCT1	tr|A0A180G7H5|A0A180G7H5_PUCT1	tr|A0A180G7H5|A0A180G7H5_PUCT1 Uncharacterized protein OS=Puccinia triticina (isolate 1-1 / race 1 (BBBD)) GN=PTTG_04746 PE=4 SV=1	31	31	31	53.2	53.2	53.2	83.639	323.31	21888000000	208	4.87816	0	-6.76124	-3.83892	26.7689	24.1266	25.7564	25.5235	26.0911	25.2311	24.8235	24.5556	24.0765	32.3548	32.5022	32.2724	A0A180G7H5	331212333	XP_003307436.1	urease accessory protein	Puccinia graminis f. sp. tritici CRL 75-36-700-3	Puccinia graminis f. sp. tritici CRL 75-36-700-3
	+	2.14314	-3.83933	tr|A0A180G806|A0A180G806_PUCT1;tr|A0A0C4F8Q2|A0A0C4F8Q2_PUCT1	tr|A0A180G806|A0A180G806_PUCT1;tr|A0A0C4F8Q2|A0A0C4F8Q2_PUCT1	tr|A0A180G806|A0A180G806_PUCT1 Homocitrate synthase, mitochondrial OS=Puccinia triticina (isolate 1-1 / race 1 (BBBD)) GN=PTTG_09554 PE=3 SV=1;tr|A0A0C4F8Q2|A0A0C4F8Q2_PUCT1 Uncharacterized protein OS=Puccinia triticina (isolate 1-1 / race 1 (BBBD)) PE=4 S	8	8	8	42.7	42.7	42.7	27.502	207.71	4312900000	56	6.58293	0.00264078	-4.21701	-2.70159	25.1759	25.7898	26.155	25.8285	25.7856	25.8596	24.5154	26.2914	24.8922	30.1554	29.9784	29.9909	A0A180G806	1034734462	OAV88609.1	homocitrate synthase, mitochondrial	Puccinia triticina 1-1 BBBD Race 1	Puccinia triticina 1-1 BBBD Race 1
	+	5.1308	-6.86632	tr|A0A180G881|A0A180G881_PUCT1;tr|A0A0C4F550|A0A0C4F550_PUCT1	tr|A0A180G881|A0A180G881_PUCT1;tr|A0A0C4F550|A0A0C4F550_PUCT1	tr|A0A180G881|A0A180G881_PUCT1 Uncharacterized protein OS=Puccinia triticina (isolate 1-1 / race 1 (BBBD)) GN=PTTG_08247 PE=4 SV=1;tr|A0A0C4F550|A0A0C4F550_PUCT1 Uncharacterized protein OS=Puccinia triticina (isolate 1-1 / race 1 (BBBD)) PE=4 SV=1	5	5	5	85.5	85.5	85.5	13.937	323.31	3653400000	40	4.04009	0.00353571	-4.69695	-2.61642	24.9031	25.3261	24.9526	25.383	24.8183	24.6442	25.3205	23.7256	25.0632	29.2602	29.8075	29.8687	A0A180G881	1034734775	OAV88905.1	hypothetical protein PTTG_08247	Puccinia triticina 1-1 BBBD Race 1	Puccinia triticina 1-1 BBBD Race 1
	+	3.77227	-4.93421	tr|A0A180G8A5|A0A180G8A5_PUCT1;tr|A0A0C4F5Y7|A0A0C4F5Y7_PUCT1	tr|A0A180G8A5|A0A180G8A5_PUCT1;tr|A0A0C4F5Y7|A0A0C4F5Y7_PUCT1	tr|A0A180G8A5|A0A180G8A5_PUCT1 Uncharacterized protein OS=Puccinia triticina (isolate 1-1 / race 1 (BBBD)) GN=PTTG_08542 PE=4 SV=1;tr|A0A0C4F5Y7|A0A0C4F5Y7_PUCT1 Uncharacterized protein OS=Puccinia triticina (isolate 1-1 / race 1 (BBBD)) PE=4 SV=1	11	11	11	39.9	39.9	39.9	36.022	78.273	4358900000	58	2.49762	0.0062335	-5.05479	-2.19967	24.0249	24.922	25.7579	23.4906	25.9578	25.7247	25.2249	24.9628	25.0637	29.8436	30.2721	30.2218	A0A180G8A5	927749501	KPA35278.1	cell wall mannoprotein	Fusarium langsethiae	Fusarium langsethiae
	+	4.76924	-5.16954	tr|A0A180G8T3|A0A180G8T3_PUCT1;tr|A0A180GVI7|A0A180GVI7_PUCT1;tr|A0A0C4ERV7|A0A0C4ERV7_PUCT1;tr|A0A0C4F7D7|A0A0C4F7D7_PUCT1;tr|A0A180FZF3|A0A180FZF3_PUCT1;tr|A0A180GFN5|A0A180GFN5_PUCT1;tr|A0A0C4FD82|A0A0C4FD82_PUCT1	tr|A0A180G8T3|A0A180G8T3_PUCT1;tr|A0A180GVI7|A0A180GVI7_PUCT1	tr|A0A180G8T3|A0A180G8T3_PUCT1 Uncharacterized protein OS=Puccinia triticina (isolate 1-1 / race 1 (BBBD)) GN=PTTG_29061 PE=3 SV=1;tr|A0A180GVI7|A0A180GVI7_PUCT1 Uncharacterized protein OS=Puccinia triticina (isolate 1-1 / race 1 (BBBD)) GN=PTTG_26262 PE=3	9	9	3	48.5	48.5	12.7	30.6	24.391	938410000	15	2.92375	0.018445	-2.53746	-1.40303	25.6102	25.3239	25.5234	25.2228	25.0136	26.0042	25.2451	24.3306	24.2605	27.936	28.0719	27.845	A0A180G8T3	403169093	XP_003889657.1	fatty acid synthase subunit beta	Puccinia graminis f. sp. tritici CRL 75-36-700-3	Puccinia graminis f. sp. tritici CRL 75-36-700-3
	+	2.89027	-2.81754	tr|A0A180G972|A0A180G972_PUCT1	tr|A0A180G972|A0A180G972_PUCT1	tr|A0A180G972|A0A180G972_PUCT1 3-isopropylmalate dehydratase OS=Puccinia triticina (isolate 1-1 / race 1 (BBBD)) GN=PTTG_28760 PE=3 SV=1	12	12	12	51.7	51.7	51.7	39.515	323.31	14982000000	97	3.7721	0.00108571	-5.92819	-3.06249	25.7604	24.7751	25.77	25.91	26.8036	25.3169	25.0695	24.0494	23.9597	31.8392	31.9417	32.0342	A0A180G972	1034735139	OAV89256.1	3-isopropylmalate dehydratase	Puccinia triticina 1-1 BBBD Race 1	Puccinia triticina 1-1 BBBD Race 1
	+	3.68492	-4.70311	tr|A0A180G994|A0A180G994_PUCT1;tr|A0A0C4EY36|A0A0C4EY36_PUCT1	tr|A0A180G994|A0A180G994_PUCT1;tr|A0A0C4EY36|A0A0C4EY36_PUCT1	tr|A0A180G994|A0A180G994_PUCT1 Uncharacterized protein OS=Puccinia triticina (isolate 1-1 / race 1 (BBBD)) GN=PTTG_05735 PE=3 SV=1;tr|A0A0C4EY36|A0A0C4EY36_PUCT1 Uncharacterized protein OS=Puccinia triticina (isolate 1-1 / race 1 (BBBD)) PE=4 SV=1	12	12	12	33.1	33.1	33.1	52.014	121.36	2682000000	32	2.14314	0.0106128	-3.83933	-1.69949	25.2029	25.3398	26.4259	24.3652	25.3507	26.9172	26.1469	24.2747	23.7587	29.6858	29.2957	29.1696	A0A180G994	599354806	XP_007403937.1	family 27 glycoside hydrolase	Melampsora larici-populina 98AG31	Melampsora larici-populina 98AG31
	+	3.15142	-2.7027	tr|A0A180G9N6|A0A180G9N6_PUCT1;tr|A0A0C4F7S0|A0A0C4F7S0_PUCT1;A0A1D5Z450;A0A1D5YFP7	tr|A0A180G9N6|A0A180G9N6_PUCT1;tr|A0A0C4F7S0|A0A0C4F7S0_PUCT1	tr|A0A180G9N6|A0A180G9N6_PUCT1 Uncharacterized protein OS=Puccinia triticina (isolate 1-1 / race 1 (BBBD)) GN=PTTG_09204 PE=4 SV=1;tr|A0A0C4F7S0|A0A0C4F7S0_PUCT1 Uncharacterized protein OS=Puccinia triticina (isolate 1-1 / race 1 (BBBD)) PE=4 SV=1	4	4	4	21.5	21.5	21.5	12.911	202.66	18282000000	39	5.1308	0	-6.86632	-3.97072	24.0328	25.6001	25.7302	25.1206	25.2779	25.2851	25.4352	25.5898	24.62	31.7157	32.4874	32.0795	A0A180G9N6	1405418863	SDA07873.1	BZ3501_MvSof-1269-A2-R1_Chr6-1g08310	Microbotryum saponariae	Microbotryum saponariae
	+	2.92909	-4.65915	tr|A0A180GA92|A0A180GA92_PUCT1;tr|A0A0C4EM69|A0A0C4EM69_PUCT1	tr|A0A180GA92|A0A180GA92_PUCT1;tr|A0A0C4EM69|A0A0C4EM69_PUCT1	tr|A0A180GA92|A0A180GA92_PUCT1 Ketol-acid reductoisomerase, mitochondrial OS=Puccinia triticina (isolate 1-1 / race 1 (BBBD)) GN=PTTG_01858 PE=3 SV=1;tr|A0A0C4EM69|A0A0C4EM69_PUCT1 Ketol-acid reductoisomerase, mitochondrial OS=Puccinia triticina (isolate 1	10	10	10	27.9	27.9	27.9	32.926	32.033	4967700000	46	3.77227	0.0036	-4.93421	-2.64903	26.1319	26.2854	25.3951	24.6707	25.3588	25.881	24.885	24.6231	24.9688	30.3901	30.2545	30.0686	A0A180GA92	1034735125	OAV89242.1	ketol-acid reductoisomerase, mitochondrial	Puccinia triticina 1-1 BBBD Race 1	Puccinia triticina 1-1 BBBD Race 1
	+	5.14923	-8.38506	tr|A0A180GA96|A0A180GA96_PUCT1;tr|A0A0C4F6S8|A0A0C4F6S8_PUCT1	tr|A0A180GA96|A0A180GA96_PUCT1;tr|A0A0C4F6S8|A0A0C4F6S8_PUCT1	tr|A0A180GA96|A0A180GA96_PUCT1 Elongation factor 1-alpha OS=Puccinia triticina (isolate 1-1 / race 1 (BBBD)) GN=PTTG_08852 PE=3 SV=1;tr|A0A0C4F6S8|A0A0C4F6S8_PUCT1 Uncharacterized protein OS=Puccinia triticina (isolate 1-1 / race 1 (BBBD)) PE=4 SV=1	38	38	38	19.2	19.2	19.2	302.58	92.968	3574200000	78	4.76924	0.0010411	-5.16954	-3.01831	24.2393	26.0385	24.8703	24.5166	24.9807	24.4135	26.7198	24.5373	25.1876	30.0418	29.6347	29.7429	A0A180GA96	1034735521	OAV89625.1	elongation factor 1-alpha	Puccinia triticina 1-1 BBBD Race 1	Puccinia triticina 1-1 BBBD Race 1
	+	3.92535	-4.62557	tr|A0A180GAB6|A0A180GAB6_PUCT1	tr|A0A180GAB6|A0A180GAB6_PUCT1	tr|A0A180GAB6|A0A180GAB6_PUCT1 Uncharacterized protein OS=Puccinia triticina (isolate 1-1 / race 1 (BBBD)) GN=PTTG_05241 PE=4 SV=1	14	14	1	26.2	26.2	1.5	82.062	36.867	1660100000	23	2.89027	0.0137092	-2.81754	-1.52331	24.4753	25.2401	25.4963	24.8874	25.2282	24.5951	24.5089	24.804	25.3954	28.1746	27.8292	27.1596	A0A180GAB6	599424028	XP_007417205.1	zinc metalloprotease	Melampsora larici-populina 98AG31	Melampsora larici-populina 98AG31
	+	2.86072	-5.52992	tr|A0A180GAV6|A0A180GAV6_PUCT1;tr|A0A0C4F0M4|A0A0C4F0M4_PUCT1	tr|A0A180GAV6|A0A180GAV6_PUCT1;tr|A0A0C4F0M4|A0A0C4F0M4_PUCT1	tr|A0A180GAV6|A0A180GAV6_PUCT1 ATP-dependent RNA helicase uap56 OS=Puccinia triticina (isolate 1-1 / race 1 (BBBD)) GN=PTTG_06641 PE=4 SV=1;tr|A0A0C4F0M4|A0A0C4F0M4_PUCT1 Uncharacterized protein OS=Puccinia triticina (isolate 1-1 / race 1 (BBBD)) PE=4 SV=1	12	12	10	22.7	22.7	18.8	65.287	90.381	3422800000	40	3.68492	0.00471642	-4.70311	-2.52336	24.1108	25.3695	25.6797	24.6202	24.9419	25.8321	26.218	25.3323	25.0079	29.7781	29.8869	29.8386	A0A180GAV6	1034735722	OAV89821.1	ATP-dependent RNA helicase uap56	Puccinia triticina 1-1 BBBD Race 1	Puccinia triticina 1-1 BBBD Race 1
	+	1.53608	-3.1663	tr|A0A180GB75|A0A180GB75_PUCT1;tr|A0A0C4F2X9|A0A0C4F2X9_PUCT1;A0A1D5YXR8;A0A1D5YFU6	tr|A0A180GB75|A0A180GB75_PUCT1;tr|A0A0C4F2X9|A0A0C4F2X9_PUCT1	tr|A0A180GB75|A0A180GB75_PUCT1 Uncharacterized protein OS=Puccinia triticina (isolate 1-1 / race 1 (BBBD)) GN=PTTG_07451 PE=4 SV=1;tr|A0A0C4F2X9|A0A0C4F2X9_PUCT1 Uncharacterized protein OS=Puccinia triticina (isolate 1-1 / race 1 (BBBD)) PE=4 SV=1	6	6	6	16.5	16.5	16.5	48.964	27.881	1256700000	25	3.15142	0.0142339	-2.7027	-1.5127	26.4207	26.1883	26.2687	24.9193	25.8935	25.3201	24.4997	25.734	24.2922	28.149	27.9891	28.1029	A0A180GB75	1024111483	KZW02645.1	putative nudC protein	Exidia glandulosa HHB12029	Exidia glandulosa HHB12029
	+	3.50727	-5.52522	tr|A0A180GBB6|A0A180GBB6_PUCT1;tr|A0A0C4ERD8|A0A0C4ERD8_PUCT1;CON__Q3ZBD7	tr|A0A180GBB6|A0A180GBB6_PUCT1;tr|A0A0C4ERD8|A0A0C4ERD8_PUCT1	tr|A0A180GBB6|A0A180GBB6_PUCT1 Glucose-6-phosphate isomerase OS=Puccinia triticina (isolate 1-1 / race 1 (BBBD)) GN=PTTG_03356 PE=3 SV=1;tr|A0A0C4ERD8|A0A0C4ERD8_PUCT1 Glucose-6-phosphate isomerase OS=Puccinia triticina (isolate 1-1 / race 1 (BBBD)) PE=3 S	10	10	10	25.2	25.2	25.2	71.16	46.711	758670000	21	2.24735	0.0459321	-2.07127	-1.10003	24.8055	25.584	25.1666	25.1608	25.2328	25.9543	26.4408	23.6014	25.9164	27.9651	27.6131	26.9835	A0A180GBB6	1034735657	OAV89757.1	glucose-6-phosphate isomerase	Puccinia triticina 1-1 BBBD Race 1	Puccinia triticina 1-1 BBBD Race 1
	+	4.44565	-4.25456	tr|A0A180GBK4|A0A180GBK4_PUCT1;tr|A0A0C4F0I4|A0A0C4F0I4_PUCT1	tr|A0A180GBK4|A0A180GBK4_PUCT1;tr|A0A0C4F0I4|A0A0C4F0I4_PUCT1	tr|A0A180GBK4|A0A180GBK4_PUCT1 Uroporphyrinogen decarboxylase OS=Puccinia triticina (isolate 1-1 / race 1 (BBBD)) GN=PTTG_06601 PE=3 SV=1;tr|A0A0C4F0I4|A0A0C4F0I4_PUCT1 Uncharacterized protein OS=Puccinia triticina (isolate 1-1 / race 1 (BBBD)) PE=4 SV=1	10	10	10	33	33	33	43.869	323.31	4638600000	44	2.92909	0.00550276	-4.65915	-2.25654	24.9029	25.7589	24.3796	24.5088	25.7509	26.3157	24.6674	23.6483	24.3766	29.8554	30.203	30.4944	A0A180GBK4	1034735975	OAV90067.1	uroporphyrinogen decarboxylase	Puccinia triticina 1-1 BBBD Race 1	Puccinia triticina 1-1 BBBD Race 1
	+	3.90211	-6.12769	tr|A0A180GBL8|A0A180GBL8_PUCT1;tr|A0A0C4F337|A0A0C4F337_PUCT1	tr|A0A180GBL8|A0A180GBL8_PUCT1;tr|A0A0C4F337|A0A0C4F337_PUCT1	tr|A0A180GBL8|A0A180GBL8_PUCT1 Uncharacterized protein OS=Puccinia triticina (isolate 1-1 / race 1 (BBBD)) GN=PTTG_07511 PE=3 SV=1;tr|A0A0C4F337|A0A0C4F337_PUCT1 Uncharacterized protein OS=Puccinia triticina (isolate 1-1 / race 1 (BBBD)) PE=3 SV=1	15	10	10	37.8	28	28	50.092	143.11	24204000000	118	5.14923	0	-8.38506	-4.71872	24.7969	25.2966	26.0501	24.217	23.7811	24.2817	24.4993	26.0867	25.2398	32.9158	32.3712	32.1479	A0A180GBL8	343791206	AEM61140.1	argonaute-like protein	Puccinia striiformis f. sp. tritici;Puccinia striiformis f. sp. tritici PST-78	Puccinia striiformis f. sp. tritici;Puccinia striiformis f. sp. tritici PST-78
	+	2.25626	-2.73492	tr|A0A180GBV1|A0A180GBV1_PUCT1	tr|A0A180GBV1|A0A180GBV1_PUCT1	tr|A0A180GBV1|A0A180GBV1_PUCT1 Uncharacterized protein OS=Puccinia triticina (isolate 1-1 / race 1 (BBBD)) GN=PTTG_12632 PE=4 SV=1	19	19	3	23.7	23.7	3.9	127.29	161.19	3142000000	64	3.92535	0.00409524	-4.62557	-2.55439	26.4644	26.6308	24.6846	24.6155	24.7357	25.5862	24.7456	24.5701	24.0996	29.5275	29.7169	29.5698	A0A180GBV1	1418867150	XP_025355832.1	putative myosin regulatory light chain cdc4, partial	Meira miltonrushii	Meira miltonrushii
	+	2.6049	-6.67156	tr|A0A180GC17|A0A180GC17_PUCT1;tr|A0A0C4F5G1|A0A0C4F5G1_PUCT1	tr|A0A180GC17|A0A180GC17_PUCT1;tr|A0A0C4F5G1|A0A0C4F5G1_PUCT1	tr|A0A180GC17|A0A180GC17_PUCT1 Pyruvate kinase OS=Puccinia triticina (isolate 1-1 / race 1 (BBBD)) GN=PTTG_08360 PE=3 SV=1;tr|A0A0C4F5G1|A0A0C4F5G1_PUCT1 Pyruvate kinase OS=Puccinia triticina (isolate 1-1 / race 1 (BBBD)) PE=3 SV=1	14	14	13	40	40	37.6	48.239	187.43	7609400000	78	2.86072	0.00468148	-5.52992	-2.51523	26.8701	24.1551	25.906	23.9271	25.6147	25.905	24.6121	24.1294	28.3928	31.3323	30.2968	30.4075	A0A180GC17	1034736082	OAV90171.1	pyruvate kinase	Puccinia triticina 1-1 BBBD Race 1	Puccinia triticina 1-1 BBBD Race 1
	+	2.36664	-2.53207	tr|A0A180GC26|A0A180GC26_PUCT1;tr|A0A0C4EXT1|A0A0C4EXT1_PUCT1	tr|A0A180GC26|A0A180GC26_PUCT1;tr|A0A0C4EXT1|A0A0C4EXT1_PUCT1	tr|A0A180GC26|A0A180GC26_PUCT1 Uncharacterized protein OS=Puccinia triticina (isolate 1-1 / race 1 (BBBD)) GN=PTTG_28501 PE=4 SV=1;tr|A0A0C4EXT1|A0A0C4EXT1_PUCT1 Uncharacterized protein OS=Puccinia triticina (isolate 1-1 / race 1 (BBBD)) PE=4 SV=1	5	5	5	38.1	38.1	38.1	22.298	11.158	912800000	18	1.53608	0.0225085	-3.1663	-1.29195	25.1097	25.4844	24.1896	25.8881	24.9593	23.135	24.4837	25.9864	24.8308	26.8292	28.2671	28.385	A0A180GC26	1183440598	ORY64774.1	SGS domain-domain-containing protein	Leucosporidium creatinivorum	Leucosporidium creatinivorum
	+	2.45935	-4.31506	tr|A0A180GC84|A0A180GC84_PUCT1	tr|A0A180GC84|A0A180GC84_PUCT1	tr|A0A180GC84|A0A180GC84_PUCT1 Uncharacterized protein OS=Puccinia triticina (isolate 1-1 / race 1 (BBBD)) GN=PTTG_12601 PE=4 SV=1	20	20	20	48	48	48	61.446	323.31	6400100000	77	3.50727	0.00292473	-5.52522	-2.79825	26.218	24.6212	25.7641	24.5961	26.053	24.7963	24.9084	24.8898	25.3222	30.6514	30.9116	30.458	A0A180GC84	1034736183	OAV90270.1	hypothetical protein PTTG_12601	Puccinia triticina 1-1 BBBD Race 1	Puccinia triticina 1-1 BBBD Race 1
	+	3.16031	-4.51421	tr|A0A180GCB3|A0A180GCB3_PUCT1;tr|A0A0C4F2L9|A0A0C4F2L9_PUCT1	tr|A0A180GCB3|A0A180GCB3_PUCT1;tr|A0A0C4F2L9|A0A0C4F2L9_PUCT1	tr|A0A180GCB3|A0A180GCB3_PUCT1 Lysine--tRNA ligase OS=Puccinia triticina (isolate 1-1 / race 1 (BBBD)) GN=PTTG_07340 PE=3 SV=1;tr|A0A0C4F2L9|A0A0C4F2L9_PUCT1 Lysine--tRNA ligase OS=Puccinia triticina (isolate 1-1 / race 1 (BBBD)) PE=3 SV=1	11	11	4	39.9	39.9	14.7	42.449	28.655	1765500000	34	4.44565	0.0044507	-4.25456	-2.48631	24.2466	25.5429	24.7375	24.8633	24.2038	24.4281	24.9071	23.8909	24.1694	28.5842	28.8373	28.8374	A0A180GCB3	913860378	KNZ53797.1	lysine--tRNA ligase	Puccinia sorghi	Puccinia sorghi
	+	4.54312	-6.27392	tr|A0A180GCE1|A0A180GCE1_PUCT1;tr|A0A0C4EMF5|A0A0C4EMF5_PUCT1	tr|A0A180GCE1|A0A180GCE1_PUCT1;tr|A0A0C4EMF5|A0A0C4EMF5_PUCT1	tr|A0A180GCE1|A0A180GCE1_PUCT1 Argininosuccinate synthase OS=Puccinia triticina (isolate 1-1 / race 1 (BBBD)) GN=PTTG_01945 PE=3 SV=1;tr|A0A0C4EMF5|A0A0C4EMF5_PUCT1 Uncharacterized protein OS=Puccinia triticina (isolate 1-1 / race 1 (BBBD)) PE=3 SV=1	30	30	30	44.6	44.6	44.6	96.942	323.31	14311000000	158	3.90211	0.00131034	-6.12769	-3.19582	25.3772	25.59	24.4461	26.3983	25.7763	24.9703	25.6692	24.9927	23.4447	31.749	31.9485	31.8304	A0A180GCE1	1034736038	OAV90128.1	argininosuccinate synthase	Puccinia triticina 1-1 BBBD Race 1	Puccinia triticina 1-1 BBBD Race 1
	+	3.31743	-2.65574	tr|A0A180GCL8|A0A180GCL8_PUCT1	tr|A0A180GCL8|A0A180GCL8_PUCT1	tr|A0A180GCL8|A0A180GCL8_PUCT1 Uncharacterized protein OS=Puccinia triticina (isolate 1-1 / race 1 (BBBD)) GN=PTTG_12430 PE=4 SV=1	5	5	5	45.8	45.8	45.8	15.228	31.909	981530000	12	2.25626	0.0191134	-2.73492	-1.36559	24.8858	27.2084	25.3226	25.2167	25.1095	25.2421	26.1444	26.8159	25.0308	28.301	28.5403	26.9317	A0A180GCL8	1034735560	OAV89663.1	hypothetical protein PTTG_12430	Puccinia triticina 1-1 BBBD Race 1	Puccinia triticina 1-1 BBBD Race 1
	+	3.37534	-3.72998	tr|A0A180GCN9|A0A180GCN9_PUCT1	tr|A0A180GCN9|A0A180GCN9_PUCT1	tr|A0A180GCN9|A0A180GCN9_PUCT1 Uncharacterized protein OS=Puccinia triticina (isolate 1-1 / race 1 (BBBD)) GN=PTTG_12726 PE=4 SV=1	24	24	24	58.5	58.5	58.5	57.623	323.31	17395000000	154	2.6049	0.00256604	-6.67156	-2.68425	25.6369	24.8239	25.6151	24.8092	24.0789	27.3289	24.8141	25.8776	24.1125	32.1661	32.0334	32.0322	A0A180GCN9	532166775	AGT80113.1	endoglucanase 4	Hemileia vastatrix	Hemileia vastatrix
	+	4.08695	-3.38993	tr|A0A180GCW1|A0A180GCW1_PUCT1;tr|A0A0C4F4S0|A0A0C4F4S0_PUCT1	tr|A0A180GCW1|A0A180GCW1_PUCT1;tr|A0A0C4F4S0|A0A0C4F4S0_PUCT1	tr|A0A180GCW1|A0A180GCW1_PUCT1 Proteasome subunit alpha type OS=Puccinia triticina (isolate 1-1 / race 1 (BBBD)) GN=PTTG_08110 PE=3 SV=1;tr|A0A0C4F4S0|A0A0C4F4S0_PUCT1 Proteasome endopeptidase complex OS=Puccinia triticina (isolate 1-1 / race 1 (BBBD)) PE=	5	5	5	25.6	25.6	25.6	25.511	11.169	868350000	21	2.36664	0.0201561	-2.53207	-1.30928	25.0622	24.6424	25.4733	24.6101	25.5956	25.8357	23.909	26.1542	24.7638	27.6144	28.3125	27.7107	A0A180GCW1	1034736456	OAV90537.1	20S proteasome subunit alpha 6	Puccinia triticina 1-1 BBBD Race 1	Puccinia triticina 1-1 BBBD Race 1
	+	4.05777	-8.09301	tr|A0A180GD88|A0A180GD88_PUCT1;tr|A0A0C4EYC7|A0A0C4EYC7_PUCT1	tr|A0A180GD88|A0A180GD88_PUCT1;tr|A0A0C4EYC7|A0A0C4EYC7_PUCT1	tr|A0A180GD88|A0A180GD88_PUCT1 Heat shock protein 60 OS=Puccinia triticina (isolate 1-1 / race 1 (BBBD)) GN=PTTG_05827 PE=3 SV=1;tr|A0A0C4EYC7|A0A0C4EYC7_PUCT1 Uncharacterized protein OS=Puccinia triticina (isolate 1-1 / race 1 (BBBD)) PE=3 SV=1	5	5	5	30.2	30.2	30.2	14.702	54.008	4027700000	33	2.45935	0.00821941	-4.31506	-1.96348	25.3668	26.0715	25.5987	26.1867	25.9469	24.3469	24.1755	24.4846	24.928	30.1467	30.251	29.0279	A0A180GD88	1034736599	OAV90677.1	heat shock protein 60	Puccinia triticina 1-1 BBBD Race 1	Puccinia triticina 1-1 BBBD Race 1
	+	4.03507	-3.46586	tr|A0A180GDI5|A0A180GDI5_PUCT1	tr|A0A180GDI5|A0A180GDI5_PUCT1	tr|A0A180GDI5|A0A180GDI5_PUCT1 Uncharacterized protein OS=Puccinia triticina (isolate 1-1 / race 1 (BBBD)) GN=PTTG_08080 PE=3 SV=1	22	22	21	39.7	39.7	38.5	74.184	156.01	5472900000	90	3.16031	0.00559551	-4.51421	-2.2842	24.9901	24.9801	24.5673	26.0674	26.6843	25.0667	25.4202	24.9004	24.7664	30.4896	30.5501	30.3213	A0A180GDI5	1173940176	OQR89677.1	glutathione S-transferase	Achlya hypogyna	Achlya hypogyna
	+	3.27289	-6.54661	tr|A0A180GDN1|A0A180GDN1_PUCT1;tr|A0A0C4F851|A0A0C4F851_PUCT1	tr|A0A180GDN1|A0A180GDN1_PUCT1;tr|A0A0C4F851|A0A0C4F851_PUCT1	tr|A0A180GDN1|A0A180GDN1_PUCT1 Uncharacterized protein OS=Puccinia triticina (isolate 1-1 / race 1 (BBBD)) GN=PTTG_09338 PE=4 SV=1;tr|A0A0C4F851|A0A0C4F851_PUCT1 Uncharacterized protein OS=Puccinia triticina (isolate 1-1 / race 1 (BBBD)) PE=4 SV=1	18	18	2	47.2	47.2	5.3	47.798	283.73	11289000000	83	4.54312	0	-6.27392	-3.49656	25.3614	25.9331	24.9371	25.3406	25.681	24.7267	24.7396	26.1162	25.0178	31.6782	31.5351	31.3567	A0A180GDN1	983146135	KWU44106.1	Creatinase/aminopeptidase, partial	Rhodotorula sp. JG-1b	Rhodotorula sp. JG-1b
	+	3.55553	-5.23791	tr|A0A180GDP3|A0A180GDP3_PUCT1;tr|A0A0C4F8U5|A0A0C4F8U5_PUCT1;tr|A0A0C4F0J0|A0A0C4F0J0_PUCT1;tr|A0A0C4EHE5|A0A0C4EHE5_PUCT1;tr|A0A180GYV3|A0A180GYV3_PUCT1;tr|A0A0C4F4B2|A0A0C4F4B2_PUCT1;tr|A0A180GBW8|A0A180GBW8_PUCT1;tr|A0A180GAT2|A0A180GAT2_PUCT1;tr|A0A0C4ETV8|A0A0C4ETV8_PUCT1	tr|A0A180GDP3|A0A180GDP3_PUCT1;tr|A0A0C4F8U5|A0A0C4F8U5_PUCT1;tr|A0A0C4F0J0|A0A0C4F0J0_PUCT1	tr|A0A180GDP3|A0A180GDP3_PUCT1 Uncharacterized protein OS=Puccinia triticina (isolate 1-1 / race 1 (BBBD)) GN=PTTG_09601 PE=4 SV=1;tr|A0A0C4F8U5|A0A0C4F8U5_PUCT1 Uncharacterized protein OS=Puccinia triticina (isolate 1-1 / race 1 (BBBD)) PE=4 SV=1;tr|A0A0C	3	3	3	21.8	21.8	21.8	14.831	6.9893	1193300000	17	3.31743	0.0142757	-2.65574	-1.51308	24.8434	25.1528	23.6548	26.0903	25.2914	25.532	25.7171	26.017	24.51	28.4784	28.2433	28.1592	A0A180GDP3	599389403	XP_007410265.1	prolyl endopeptidase	Melampsora larici-populina 98AG31	Melampsora larici-populina 98AG31
	+	3.02136	-2.22205	tr|A0A180GDR6|A0A180GDR6_PUCT1;tr|A0A0C4EP80|A0A0C4EP80_PUCT1	tr|A0A180GDR6|A0A180GDR6_PUCT1	tr|A0A180GDR6|A0A180GDR6_PUCT1 Protein arginine N-methyltransferase 1 OS=Puccinia triticina (isolate 1-1 / race 1 (BBBD)) GN=PTTG_02581 PE=3 SV=1	8	8	8	31.2	31.2	31.2	32.415	66.664	1957500000	20	3.37534	0.00761991	-3.72998	-2.02023	25.4364	25.5368	26.3422	25.5166	25.6164	24.6527	25.1719	26.4331	24.2904	28.6768	29.2164	29.0824	A0A180GDR6	1034736390	OAV90472.1	protein arginine N-methyltransferase 1	Puccinia triticina 1-1 BBBD Race 1	Puccinia triticina 1-1 BBBD Race 1
	+	3.25115	-5.07691	tr|A0A180GDU6|A0A180GDU6_PUCT1	tr|A0A180GDU6|A0A180GDU6_PUCT1	tr|A0A180GDU6|A0A180GDU6_PUCT1 Uncharacterized protein OS=Puccinia triticina (isolate 1-1 / race 1 (BBBD)) GN=PTTG_28217 PE=4 SV=1	9	9	9	41.5	41.5	41.5	28.077	62.825	2227000000	28	4.08695	0.00836052	-3.38993	-1.98555	25.7091	24.9092	25.6308	25.595	26.1443	25.6419	25.2096	24.7473	25.1439	29.1518	29.3879	29.0113	A0A180GDU6	913873663	KNZ60773.1	thioredoxin	Puccinia sorghi	Puccinia sorghi
	+	2.26741	-3.06736	tr|A0A180GE35|A0A180GE35_PUCT1;tr|A0A0C4EZ33|A0A0C4EZ33_PUCT1	tr|A0A180GE35|A0A180GE35_PUCT1;tr|A0A0C4EZ33|A0A0C4EZ33_PUCT1	tr|A0A180GE35|A0A180GE35_PUCT1 Uncharacterized protein OS=Puccinia triticina (isolate 1-1 / race 1 (BBBD)) GN=PTTG_06088 PE=4 SV=1;tr|A0A0C4EZ33|A0A0C4EZ33_PUCT1 Uncharacterized protein OS=Puccinia triticina (isolate 1-1 / race 1 (BBBD)) PE=4 SV=1	31	31	31	60.6	60.6	60.6	61.838	323.31	28991000000	229	4.05777	0	-8.09301	-4.03965	25.9003	24.9939	25.0194	23.7921	25.4532	24.944	24.572	25.3986	24.7158	32.7433	33.0393	32.6858	A0A180GE35	1405427568	SCZ92367.1	BZ3501_MvSof-1269-A2-R1_Chr2-1g04361	Microbotryum saponariae	Microbotryum saponariae
	+	3.62076	-6.37629	tr|A0A180GE43|A0A180GE43_PUCT1;tr|A0A0C4EW46|A0A0C4EW46_PUCT1;tr|A0A0C4EW47|A0A0C4EW47_PUCT1	tr|A0A180GE43|A0A180GE43_PUCT1;tr|A0A0C4EW46|A0A0C4EW46_PUCT1	tr|A0A180GE43|A0A180GE43_PUCT1 Thiamine thiazole synthase OS=Puccinia triticina (isolate 1-1 / race 1 (BBBD)) GN=PTTG_28269 PE=3 SV=1;tr|A0A0C4EW46|A0A0C4EW46_PUCT1 Uncharacterized protein OS=Puccinia triticina (isolate 1-1 / race 1 (BBBD)) PE=4 SV=1	6	6	1	36.4	36.4	9.7	23.167	23.321	2411600000	24	4.03507	0.00755157	-3.46586	-2.01685	26.2347	26.7393	24.8173	25.922	25.8164	25.4825	23.8656	24.8304	25.2621	28.9071	29.2026	29.5088	A0A180GE43	1034736522	OAV90602.1	thiazole biosynthetic enzyme, mitochondrial	Puccinia triticina 1-1 BBBD Race 1	Puccinia triticina 1-1 BBBD Race 1
	+	2.18347	-2.16126	tr|A0A180GEC1|A0A180GEC1_PUCT1;tr|A0A0C4EZ32|A0A0C4EZ32_PUCT1	tr|A0A180GEC1|A0A180GEC1_PUCT1;tr|A0A0C4EZ32|A0A0C4EZ32_PUCT1	tr|A0A180GEC1|A0A180GEC1_PUCT1 Carboxypeptidase OS=Puccinia triticina (isolate 1-1 / race 1 (BBBD)) GN=PTTG_06087 PE=3 SV=1;tr|A0A0C4EZ32|A0A0C4EZ32_PUCT1 Carboxypeptidase OS=Puccinia triticina (isolate 1-1 / race 1 (BBBD)) PE=3 SV=1	15	15	15	51.6	51.6	51.6	42.878	323.31	26366000000	169	3.27289	0.00107042	-6.54661	-3.05073	25.6508	24.5414	26.1565	27.3955	25.5468	25.4663	25.0261	23.0452	24.754	32.8018	32.847	32.3997	A0A180GEC1	1384681931	PVG01434.1	alpha/beta-hydrolase	Serendipita vermifera 'subsp. bescii'	Serendipita vermifera 'subsp. bescii'
	+	3.32181	-4.91944	tr|A0A180GER1|A0A180GER1_PUCT1;tr|A0A0C4DF54|A0A0C4DF54_PUCT1	tr|A0A180GER1|A0A180GER1_PUCT1;tr|A0A0C4DF54|A0A0C4DF54_PUCT1	tr|A0A180GER1|A0A180GER1_PUCT1 Uncharacterized protein OS=Puccinia triticina (isolate 1-1 / race 1 (BBBD)) GN=PTTG_05116 PE=4 SV=1;tr|A0A0C4DF54|A0A0C4DF54_PUCT1 Uncharacterized protein OS=Puccinia triticina (isolate 1-1 / race 1 (BBBD)) PE=4 SV=1	22	22	22	30.6	30.6	30.6	94.396	89.607	6549400000	74	3.55553	0.00266667	-5.23791	-2.70381	25.6032	25.6812	27.1438	26.2495	25.1465	24.8962	24.5919	24.9304	25.2216	30.4348	30.6672	30.904	A0A180GER1	814541740	CEQ40966.1	SPOSA6832_02652	Sporidiobolus salmonicolor	Sporidiobolus salmonicolor
	+	4.24163	-6.58511	tr|A0A180GEX3|A0A180GEX3_PUCT1;tr|A0A0C4FAD7|A0A0C4FAD7_PUCT1	tr|A0A180GEX3|A0A180GEX3_PUCT1;tr|A0A0C4FAD7|A0A0C4FAD7_PUCT1	tr|A0A180GEX3|A0A180GEX3_PUCT1 Uncharacterized protein OS=Puccinia triticina (isolate 1-1 / race 1 (BBBD)) GN=PTTG_10178 PE=4 SV=1;tr|A0A0C4FAD7|A0A0C4FAD7_PUCT1 Uncharacterized protein OS=Puccinia triticina (isolate 1-1 / race 1 (BBBD)) PE=4 SV=1	6	6	6	23.9	23.9	23.9	38.759	47.304	697860000	19	3.02136	0.0245634	-2.22205	-1.26628	25.7854	25.395	24.942	25.2805	25.4352	24.7794	26.1574	25.8928	25.459	27.6158	27.4677	27.0778	A0A180GEX3	972236596	CEL06012.1	Putative Small secreted protein	Aspergillus calidoustus	Aspergillus calidoustus
	+	3.00744	-3.66991	tr|A0A180GEX5|A0A180GEX5_PUCT1;tr|A0A0C4F123|A0A0C4F123_PUCT1	tr|A0A180GEX5|A0A180GEX5_PUCT1	tr|A0A180GEX5|A0A180GEX5_PUCT1 Uncharacterized protein OS=Puccinia triticina (isolate 1-1 / race 1 (BBBD)) GN=PTTG_06793 PE=3 SV=1	5	5	5	56.2	56.2	56.2	11.35	77.311	6849400000	31	3.25115	0.00489922	-5.07691	-2.52907	23.7329	25.6676	24.2744	26.463	25.5487	24.8853	23.6011	24.3613	25.0803	30.2697	30.9225	30.9355	A0A180GEX5	403164053	XP_003324136.2	X-Pro aminopeptidase	Puccinia graminis f. sp. tritici CRL 75-36-700-3	Puccinia graminis f. sp. tritici CRL 75-36-700-3
	+	3.66135	-2.79326	tr|A0A180GEZ5|A0A180GEZ5_PUCT1;tr|A0A0C4EP94|A0A0C4EP94_PUCT1	tr|A0A180GEZ5|A0A180GEZ5_PUCT1;tr|A0A0C4EP94|A0A0C4EP94_PUCT1	tr|A0A180GEZ5|A0A180GEZ5_PUCT1 Aminomethyltransferase OS=Puccinia triticina (isolate 1-1 / race 1 (BBBD)) GN=PTTG_02595 PE=3 SV=1;tr|A0A0C4EP94|A0A0C4EP94_PUCT1 Aminomethyltransferase OS=Puccinia triticina (isolate 1-1 / race 1 (BBBD)) PE=3 SV=1	7	7	7	18.5	18.5	18.5	57.814	18.368	974000000	20	2.26741	0.0145937	-3.06736	-1.48912	25.1885	26.1046	25.8658	24.6456	24.0253	25.8945	25.1627	25.0825	25.5873	27.799	28.1342	27.8344	A0A180GEZ5	1034736421	OAV90503.1	glycine cleavage system T protein	Puccinia triticina 1-1 BBBD Race 1	Puccinia triticina 1-1 BBBD Race 1
	+	3.64146	-3.13629	tr|A0A180GF33|A0A180GF33_PUCT1;tr|A0A0C4F358|A0A0C4F358_PUCT1	tr|A0A180GF33|A0A180GF33_PUCT1;tr|A0A0C4F358|A0A0C4F358_PUCT1	tr|A0A180GF33|A0A180GF33_PUCT1 Uncharacterized protein OS=Puccinia triticina (isolate 1-1 / race 1 (BBBD)) GN=PTTG_07532 PE=4 SV=1;tr|A0A0C4F358|A0A0C4F358_PUCT1 Uncharacterized protein OS=Puccinia triticina (isolate 1-1 / race 1 (BBBD)) PE=4 SV=1	15	15	15	49.4	49.4	49.4	35.768	221.17	23354000000	120	3.62076	0.00126667	-6.37629	-3.16879	24.9708	25.9182	26.1763	27.1187	25.5213	25.7046	25.0881	25.1369	24.6827	32.5355	32.6153	32.3227	A0A180GF33	403166009	XP_003325923.2	PiT family inorganic phosphate transporter	Puccinia graminis f. sp. tritici CRL 75-36-700-3	Puccinia graminis f. sp. tritici CRL 75-36-700-3
	+	2.63746	-4.06675	tr|A0A180GF72|A0A180GF72_PUCT1	tr|A0A180GF72|A0A180GF72_PUCT1	tr|A0A180GF72|A0A180GF72_PUCT1 Uncharacterized protein (Fragment) OS=Puccinia triticina (isolate 1-1 / race 1 (BBBD)) GN=PTTG_28026 PE=3 SV=1	6	6	6	16.3	16.3	16.3	67.313	17.816	549000000	15	2.18347	0.0396327	-2.16126	-1.12782	25.9048	27.2516	26.5523	24.649	25.7947	24.6745	24.269	24.1394	25.3514	26.8723	27.2597	27.47	A0A180GF72	331222999	XP_003324173.1	heat shock 70kDa protein 4	Puccinia graminis f. sp. tritici CRL 75-36-700-3	Puccinia graminis f. sp. tritici CRL 75-36-700-3
	+	4.27767	-7.14624	tr|A0A180GFE5|A0A180GFE5_PUCT1;tr|A0A0C4EV63|A0A0C4EV63_PUCT1	tr|A0A180GFE5|A0A180GFE5_PUCT1;tr|A0A0C4EV63|A0A0C4EV63_PUCT1	tr|A0A180GFE5|A0A180GFE5_PUCT1 Aminopeptidase OS=Puccinia triticina (isolate 1-1 / race 1 (BBBD)) GN=PTTG_04695 PE=3 SV=1;tr|A0A0C4EV63|A0A0C4EV63_PUCT1 Aminopeptidase OS=Puccinia triticina (isolate 1-1 / race 1 (BBBD)) PE=3 SV=1	10	10	10	34.5	34.5	34.5	42.822	50.147	4833200000	60	3.32181	0.00451429	-4.91944	-2.49531	26.0577	27.0867	24.3872	24.8167	26.1238	24.6591	24.9993	24.4321	24.3375	29.9548	30.1921	30.2111	A0A180GFE5	599360415	XP_007404988.1	alanyl aminopeptidase	Melampsora larici-populina 98AG31	Melampsora larici-populina 98AG31
	+	2.02926	-3.18209	tr|A0A180GFJ2|A0A180GFJ2_PUCT1;tr|A0A0C4EW94|A0A0C4EW94_PUCT1	tr|A0A180GFJ2|A0A180GFJ2_PUCT1;tr|A0A0C4EW94|A0A0C4EW94_PUCT1	tr|A0A180GFJ2|A0A180GFJ2_PUCT1 Uncharacterized protein OS=Puccinia triticina (isolate 1-1 / race 1 (BBBD)) GN=PTTG_27957 PE=3 SV=1;tr|A0A0C4EW94|A0A0C4EW94_PUCT1 Uncharacterized protein OS=Puccinia triticina (isolate 1-1 / race 1 (BBBD)) PE=3 SV=1	3	3	3	22.5	22.5	22.5	20.166	156.24	14202000000	30	4.24163	0	-6.58511	-3.5252	23.5098	25.3499	24.6887	25.6051	25.6522	24.5434	23.6603	25.897	24.962	31.7289	31.9563	31.8709	A0A180GFJ2	808367144	XP_012188992.1	phosphoserine aminotransferase	Pseudozyma hubeiensis SY62	Pseudozyma hubeiensis SY62
	+	3.17837	-3.20979	tr|A0A180GFJ3|A0A180GFJ3_PUCT1;tr|A0A0C4EW93|A0A0C4EW93_PUCT1	tr|A0A180GFJ3|A0A180GFJ3_PUCT1;tr|A0A0C4EW93|A0A0C4EW93_PUCT1	tr|A0A180GFJ3|A0A180GFJ3_PUCT1 Eukaryotic translation initiation factor 3 subunit G OS=Puccinia triticina (isolate 1-1 / race 1 (BBBD)) GN=TIF35 PE=3 SV=1;tr|A0A0C4EW93|A0A0C4EW93_PUCT1 Eukaryotic translation initiation factor 3 subunit G OS=Puccinia triti	13	13	13	24.4	24.4	24.4	79.281	129.48	1576300000	30	3.00744	0.00819048	-3.66991	-1.90712	25.8945	25.3291	25.525	25.4527	24.2685	25.1518	25.9123	24.9383	23.4497	28.1704	28.9233	28.789	A0A180GFJ3	913850622	KNZ49309.1	eukaryotic translation initiation factor 3 subunit G	Puccinia sorghi	Puccinia sorghi
	+	3.03342	-3.34116	tr|A0A180GG12|A0A180GG12_PUCT1;tr|A0A0C4ETG0|A0A0C4ETG0_PUCT1	tr|A0A180GG12|A0A180GG12_PUCT1;tr|A0A0C4ETG0|A0A0C4ETG0_PUCT1	tr|A0A180GG12|A0A180GG12_PUCT1 Uncharacterized protein OS=Puccinia triticina (isolate 1-1 / race 1 (BBBD)) GN=PTTG_04089 PE=4 SV=1;tr|A0A0C4ETG0|A0A0C4ETG0_PUCT1 Uncharacterized protein OS=Puccinia triticina (isolate 1-1 / race 1 (BBBD)) PE=4 SV=1	10	10	10	37.4	37.4	37.4	44.905	31.104	791090000	27	3.66135	0.0124728	-2.79326	-1.62484	24.9452	24.4107	24.3735	24.7841	24.613	24.9046	25.1925	24.38	25.9342	27.5017	27.9362	27.2435	A0A180GG12	914261899	KNZ76994.1	Chromatin structure-remodeling complex subunit rsc9	Termitomyces sp. J132	Termitomyces sp. J132
	+	3.12595	-3.83928	tr|A0A180GGD1|A0A180GGD1_PUCT1;tr|A0A0C4F0A2|A0A0C4F0A2_PUCT1	tr|A0A180GGD1|A0A180GGD1_PUCT1;tr|A0A0C4F0A2|A0A0C4F0A2_PUCT1	tr|A0A180GGD1|A0A180GGD1_PUCT1 Uncharacterized protein OS=Puccinia triticina (isolate 1-1 / race 1 (BBBD)) GN=PTTG_06518 PE=3 SV=1;tr|A0A0C4F0A2|A0A0C4F0A2_PUCT1 Uncharacterized protein OS=Puccinia triticina (isolate 1-1 / race 1 (BBBD)) PE=3 SV=1	10	10	10	19.6	19.6	19.6	62.819	89.979	1273000000	34	3.64146	0.0106667	-3.13629	-1.7933	25.6633	26.5889	25.4764	25.7128	25.1756	24.8675	25.995	25.5513	26.2324	28.4383	28.394	28.3325	A0A180GGD1	331232013	XP_003328669.1	adenine phosphoribosyltransferase	Puccinia graminis f. sp. tritici CRL 75-36-700-3	Puccinia graminis f. sp. tritici CRL 75-36-700-3
	+	3.06119	-3.67193	tr|A0A180GGF1|A0A180GGF1_PUCT1;tr|A0A0C4F7N0|A0A0C4F7N0_PUCT1	tr|A0A180GGF1|A0A180GGF1_PUCT1;tr|A0A0C4F7N0|A0A0C4F7N0_PUCT1	tr|A0A180GGF1|A0A180GGF1_PUCT1 Uncharacterized protein OS=Puccinia triticina (isolate 1-1 / race 1 (BBBD)) GN=PTTG_09164 PE=4 SV=1;tr|A0A0C4F7N0|A0A0C4F7N0_PUCT1 Uncharacterized protein OS=Puccinia triticina (isolate 1-1 / race 1 (BBBD)) PE=4 SV=1	35	3	3	53	3.5	3.5	81.969	7.8107	3078100000	15	2.63746	0.00818487	-4.06675	-1.94697	24.397	25.152	25.6397	25.4885	26.4674	24.5166	25.5958	25.3468	24.1171	29.6173	29.8207	29.2348	A0A180GGF1	1034736973	OAV91043.1	hypothetical protein PTTG_09164	Puccinia triticina 1-1 BBBD Race 1	Puccinia triticina 1-1 BBBD Race 1
	+	3.70661	-4.62609	tr|A0A180GGI7|A0A180GGI7_PUCT1;tr|A0A0C4ES54|A0A0C4ES54_PUCT1	tr|A0A180GGI7|A0A180GGI7_PUCT1;tr|A0A0C4ES54|A0A0C4ES54_PUCT1	tr|A0A180GGI7|A0A180GGI7_PUCT1 NAD-specific glutamate dehydrogenase OS=Puccinia triticina (isolate 1-1 / race 1 (BBBD)) GN=PTTG_03628 PE=3 SV=1;tr|A0A0C4ES54|A0A0C4ES54_PUCT1 NAD-specific glutamate dehydrogenase OS=Puccinia triticina (isolate 1-1 / race 1	34	34	34	44.5	44.5	44.5	101.23	323.31	17833000000	215	4.27767	0	-7.14624	-3.7789	24.8302	26.0004	24.793	24.2566	25.1418	25.5267	24.9687	24.1626	24.8299	31.9065	32.2188	32.2385	A0A180GGI7	331240138	XP_003332720.1	glutamate dehydrogenase	Puccinia graminis f. sp. tritici CRL 75-36-700-3	Puccinia graminis f. sp. tritici CRL 75-36-700-3
	+	4.49381	-3.4324	tr|A0A180GH18|A0A180GH18_PUCT1;tr|A0A0C4F2F4|A0A0C4F2F4_PUCT1	tr|A0A180GH18|A0A180GH18_PUCT1;tr|A0A0C4F2F4|A0A0C4F2F4_PUCT1	tr|A0A180GH18|A0A180GH18_PUCT1 Uncharacterized protein OS=Puccinia triticina (isolate 1-1 / race 1 (BBBD)) GN=PTTG_07275 PE=3 SV=1;tr|A0A0C4F2F4|A0A0C4F2F4_PUCT1 Uncharacterized protein OS=Puccinia triticina (isolate 1-1 / race 1 (BBBD)) PE=3 SV=1	7	7	7	19	19	19	45.188	37.071	980410000	23	2.02926	0.0152472	-3.18209	-1.4611	25.3573	25.9319	25.7316	23.5439	25.0895	25.6985	24.2733	25.6615	24.9585	28.2272	27.5236	28.1274	A0A180GH18	599389150	XP_007410228.1	Xaa-Pro dipeptidase	Melampsora larici-populina 98AG31	Melampsora larici-populina 98AG31
	+	3.55402	-7.06549	tr|A0A180GH43|A0A180GH43_PUCT1	tr|A0A180GH43|A0A180GH43_PUCT1	tr|A0A180GH43|A0A180GH43_PUCT1 Uncharacterized protein OS=Puccinia triticina (isolate 1-1 / race 1 (BBBD)) GN=PTTG_27844 PE=4 SV=1	8	8	8	42.3	42.3	42.3	32.386	66.663	1310900000	31	3.17837	0.0106901	-3.20979	-1.74918	24.3134	24.603	25.0828	25.5636	25.0328	24.728	24.5447	24.7954	25.0757	27.8758	28.4326	28.6453	A0A180GH43	1034737839	OAV91894.1	hypothetical protein PTTG_27844	Puccinia triticina 1-1 BBBD Race 1	Puccinia triticina 1-1 BBBD Race 1
	+	2.64569	-4.25199	tr|A0A180GHH2|A0A180GHH2_PUCT1;tr|A0A0C4F2U5|A0A0C4F2U5_PUCT1;tr|A0A180GY73|A0A180GY73_PUCT1	tr|A0A180GHH2|A0A180GHH2_PUCT1;tr|A0A0C4F2U5|A0A0C4F2U5_PUCT1	tr|A0A180GHH2|A0A180GHH2_PUCT1 6-phosphogluconolactonase OS=Puccinia triticina (isolate 1-1 / race 1 (BBBD)) GN=PTTG_07416 PE=4 SV=1;tr|A0A0C4F2U5|A0A0C4F2U5_PUCT1 Uncharacterized protein OS=Puccinia triticina (isolate 1-1 / race 1 (BBBD)) PE=4 SV=1	9	9	9	31.5	31.5	31.5	52.325	18.797	1312100000	17	3.03342	0.0104373	-3.34116	-1.7769	24.8677	26.2969	25.8138	25.6239	24.9905	24.5217	24.4725	24.8775	25.8556	28.7398	28.3955	28.0244	A0A180GHH2	1034737865	OAV91919.1	6-phosphogluconolactonase	Puccinia triticina 1-1 BBBD Race 1	Puccinia triticina 1-1 BBBD Race 1
	+	4.4457	-3.89497	tr|A0A180GI78|A0A180GI78_PUCT1;tr|A0A0C4EN76|A0A0C4EN76_PUCT1	tr|A0A180GI78|A0A180GI78_PUCT1;tr|A0A0C4EN76|A0A0C4EN76_PUCT1	tr|A0A180GI78|A0A180GI78_PUCT1 Uncharacterized protein OS=Puccinia triticina (isolate 1-1 / race 1 (BBBD)) GN=PTTG_02217 PE=4 SV=1;tr|A0A0C4EN76|A0A0C4EN76_PUCT1 Uncharacterized protein OS=Puccinia triticina (isolate 1-1 / race 1 (BBBD)) PE=4 SV=1	5	5	5	41.5	41.5	41.5	19.918	11.22	1715700000	18	3.12595	0.0080708	-3.83928	-2.00646	25.4188	25.3894	25.6274	23.9083	24.9794	25.2251	25.2841	25.4945	25.569	28.5855	28.6683	28.3768	A0A180GI78	757382426	KIR87772.1	cytoplasmic protein	Cryptococcus gattii VGIV IND107	Cryptococcus gattii VGIV IND107
	+	4.19184	-4.32956	tr|A0A180GIP7|A0A180GIP7_PUCT1;tr|A0A0C4ESY9|A0A0C4ESY9_PUCT1	tr|A0A180GIP7|A0A180GIP7_PUCT1;tr|A0A0C4ESY9|A0A0C4ESY9_PUCT1	tr|A0A180GIP7|A0A180GIP7_PUCT1 Uncharacterized protein OS=Puccinia triticina (isolate 1-1 / race 1 (BBBD)) GN=PTTG_03918 PE=3 SV=1;tr|A0A0C4ESY9|A0A0C4ESY9_PUCT1 Uncharacterized protein OS=Puccinia triticina (isolate 1-1 / race 1 (BBBD)) PE=3 SV=1	3	3	3	17.3	17.3	17.3	21.062	31.621	1537600000	18	3.06119	0.00845902	-3.67193	-1.9214	25.8838	25.2617	25.817	24.3375	24.8104	25.6299	23.4326	25.3307	24.1521	28.4402	28.9231	28.4304	A0A180GIP7	599427871	XP_007418334.1	metallopeptidase MepB	Melampsora larici-populina 98AG31	Melampsora larici-populina 98AG31
	+	2.40113	-4.0293	tr|A0A180GJJ1|A0A180GJJ1_PUCT1	tr|A0A180GJJ1|A0A180GJJ1_PUCT1	tr|A0A180GJJ1|A0A180GJJ1_PUCT1 Uncharacterized protein OS=Puccinia triticina (isolate 1-1 / race 1 (BBBD)) GN=PTTG_27503 PE=4 SV=1	26	26	26	38.3	38.3	38.3	116.98	221.85	4047500000	80	3.70661	0.00454676	-4.62609	-2.49607	25.5014	25.3195	26.9109	25.3235	26.0528	24.8784	25.742	24.618	24.6642	29.8799	30.0738	30.1793	A0A180GJJ1	331244927	XP_003335102.1	kinesin family member C1	Puccinia graminis f. sp. tritici CRL 75-36-700-3	Puccinia graminis f. sp. tritici CRL 75-36-700-3
	+	2.86995	-3.81677	tr|A0A180GJP5|A0A180GJP5_PUCT1;tr|A0A0C4EPN4|A0A0C4EPN4_PUCT1	tr|A0A180GJP5|A0A180GJP5_PUCT1;tr|A0A0C4EPN4|A0A0C4EPN4_PUCT1	tr|A0A180GJP5|A0A180GJP5_PUCT1 Glutamate synthase [NADPH] OS=Puccinia triticina (isolate 1-1 / race 1 (BBBD)) GN=PTTG_02737 PE=4 SV=1;tr|A0A0C4EPN4|A0A0C4EPN4_PUCT1 Uncharacterized protein OS=Puccinia triticina (isolate 1-1 / race 1 (BBBD)) PE=4 SV=1	8	8	8	25.7	25.7	25.7	52.254	81.154	1488400000	35	4.49381	0.00786916	-3.4324	-2.06065	25.5816	25.4222	25.2795	24.9142	25.3923	25.1659	25.0324	25.6287	24.3985	28.4072	28.6931	28.6694	A0A180GJP5	1034738856	OAV92895.1	glutamate synthase	Puccinia triticina 1-1 BBBD Race 1	Puccinia triticina 1-1 BBBD Race 1
	+	1.76581	-3.38789	tr|A0A180GK70|A0A180GK70_PUCT1;tr|A0A0C4EPK7|A0A0C4EPK7_PUCT1	tr|A0A180GK70|A0A180GK70_PUCT1;tr|A0A0C4EPK7|A0A0C4EPK7_PUCT1	tr|A0A180GK70|A0A180GK70_PUCT1 Uncharacterized protein OS=Puccinia triticina (isolate 1-1 / race 1 (BBBD)) GN=PTTG_02709 PE=4 SV=1;tr|A0A0C4EPK7|A0A0C4EPK7_PUCT1 Uncharacterized protein OS=Puccinia triticina (isolate 1-1 / race 1 (BBBD)) PE=4 SV=1	4	3	3	29.9	24.4	24.4	13.879	24.45	15725000000	63	3.55402	0	-7.06549	-3.3801	25.7311	25.4022	25.5161	24.3457	25.8948	24.5351	25.5747	25.1156	25.5518	32.4015	32.2378	31.3327	A0A180GK70	1022858099	XP_016271216.1	transformer-SR ribonucleoprotein	Rhodotorula toruloides;Rhodotorula toruloides NP11	Rhodotorula toruloides;Rhodotorula toruloides NP11
	+	3.12834	-6.60296	tr|A0A180GLK7|A0A180GLK7_PUCT1;tr|A0A0C4F0G1|A0A0C4F0G1_PUCT1	tr|A0A180GLK7|A0A180GLK7_PUCT1;tr|A0A0C4F0G1|A0A0C4F0G1_PUCT1	tr|A0A180GLK7|A0A180GLK7_PUCT1 Uncharacterized protein OS=Puccinia triticina (isolate 1-1 / race 1 (BBBD)) GN=PTTG_06577 PE=4 SV=1;tr|A0A0C4F0G1|A0A0C4F0G1_PUCT1 Uncharacterized protein OS=Puccinia triticina (isolate 1-1 / race 1 (BBBD)) PE=4 SV=1	8	8	8	48.9	48.9	48.9	28.993	20.665	1932200000	37	2.64569	0.00748444	-4.25199	-2.01281	26.2713	24.4193	24.7126	23.6793	25.6653	24.8355	25.0389	25.2711	25.568	28.9922	29.3329	28.611	A0A180GLK7	599416452	XP_007415250.1	secreted protein	Melampsora larici-populina 98AG31	Melampsora larici-populina 98AG31
	+	2.02469	-2.62823	tr|A0A180GLR4|A0A180GLR4_PUCT1;tr|A0A0C4EMR4|A0A0C4EMR4_PUCT1	tr|A0A180GLR4|A0A180GLR4_PUCT1;tr|A0A0C4EMR4|A0A0C4EMR4_PUCT1	tr|A0A180GLR4|A0A180GLR4_PUCT1 Eukaryotic translation initiation factor 3 subunit C OS=Puccinia triticina (isolate 1-1 / race 1 (BBBD)) GN=NIP1 PE=3 SV=1;tr|A0A0C4EMR4|A0A0C4EMR4_PUCT1 Eukaryotic translation initiation factor 3 subunit C OS=Puccinia tritic	12	12	12	48.1	48.1	48.1	35.489	63.457	2156500000	25	4.4457	0.00505747	-3.89497	-2.30017	24.9196	24.8984	25.0423	24.5183	24.6912	25.1308	25.5691	25.1849	25.317	28.6122	28.8036	28.6093	A0A180GLR4	403168004	XP_003327721.2	translation initiation factor eIF-3 subunit 8	Puccinia graminis f. sp. tritici CRL 75-36-700-3	Puccinia graminis f. sp. tritici CRL 75-36-700-3
	+	2.55965	-2.17489	tr|A0A180GLY5|A0A180GLY5_PUCT1;tr|A0A0C4F858|A0A0C4F858_PUCT1	tr|A0A180GLY5|A0A180GLY5_PUCT1	tr|A0A180GLY5|A0A180GLY5_PUCT1 Eukaryotic translation initiation factor 3 subunit E OS=Puccinia triticina (isolate 1-1 / race 1 (BBBD)) GN=INT6 PE=3 SV=1	18	18	18	36.7	36.7	36.7	78.226	59.552	2974500000	63	4.19184	0.00441958	-4.32956	-2.47534	25.7878	26.6807	25.0674	24.7418	25.3785	25.3803	24.2583	25.0377	25.1398	29.3676	29.7562	29.3655	A0A180GLY5	913857357	KNZ52204.1	eukaryotic translation initiation factor 3 subunit E, partial	Puccinia sorghi	Puccinia sorghi
	+	3.20354	-4.59765	tr|A0A180GM15|A0A180GM15_PUCT1;tr|A0A0C4EJB1|A0A0C4EJB1_PUCT1	tr|A0A180GM15|A0A180GM15_PUCT1;tr|A0A0C4EJB1|A0A0C4EJB1_PUCT1	tr|A0A180GM15|A0A180GM15_PUCT1 Serine hydroxymethyltransferase OS=Puccinia triticina (isolate 1-1 / race 1 (BBBD)) GN=PTTG_00829 PE=3 SV=1;tr|A0A0C4EJB1|A0A0C4EJB1_PUCT1 Serine hydroxymethyltransferase OS=Puccinia triticina (isolate 1-1 / race 1 (BBBD)) PE	6	6	6	16.9	16.9	16.9	51.837	12.791	411680000	12	2.18113	0.0410467	-2.14521	-1.12089	24.4754	25.6038	25.2616	24.1813	25.3671	24.0938	24.6966	25.8037	27.3851	26.5898	26.7529	26.7352	A0A180GM15	1034739477	OAV93509.1	serine hydroxymethyltransferase	Puccinia triticina 1-1 BBBD Race 1	Puccinia triticina 1-1 BBBD Race 1
	+	2.65604	-2.79614	tr|A0A180GMQ8|A0A180GMQ8_PUCT1	tr|A0A180GMQ8|A0A180GMQ8_PUCT1	tr|A0A180GMQ8|A0A180GMQ8_PUCT1 Uncharacterized protein OS=Puccinia triticina (isolate 1-1 / race 1 (BBBD)) GN=PTTG_12592 PE=4 SV=1	7	7	1	36	36	7.5	18.876	46.687	7510900000	38	2.40113	0.00983784	-4.0293	-1.85197	22.7403	25.392	25.0846	26.4262	25.3756	24.5115	24.8902	25.6851	25.1751	30.0935	29.5488	28.759	A0A180GMQ8	1405427236	SCZ91580.1	BZ3501_MvSof-1269-A2-R1_Chr2-1g04029	Microbotryum saponariae	Microbotryum saponariae
	+	2.4704	-2.61185	tr|A0A180GMS2|A0A180GMS2_PUCT1;tr|A0A0C4F105|A0A0C4F105_PUCT1	tr|A0A180GMS2|A0A180GMS2_PUCT1;tr|A0A0C4F105|A0A0C4F105_PUCT1	tr|A0A180GMS2|A0A180GMS2_PUCT1 Importin subunit alpha OS=Puccinia triticina (isolate 1-1 / race 1 (BBBD)) GN=PTTG_06775 PE=3 SV=1;tr|A0A0C4F105|A0A0C4F105_PUCT1 Importin subunit alpha OS=Puccinia triticina (isolate 1-1 / race 1 (BBBD)) PE=3 SV=1	25	24	24	16.5	15.7	15.7	233.86	86.145	3034600000	55	2.86995	0.00852893	-3.81677	-1.92818	25.4472	24.5632	25.4763	26.4675	25.107	24.9812	24.9741	26.0431	24.6115	29.3807	29.2185	29.4068	A0A180GMS2	913853711	KNZ50533.1	importin subunit alpha	Puccinia sorghi	Puccinia sorghi
	+	2.17303	-2.53537	tr|A0A180GMU7|A0A180GMU7_PUCT1;tr|A0A0C4F0X1|A0A0C4F0X1_PUCT1	tr|A0A180GMU7|A0A180GMU7_PUCT1;tr|A0A0C4F0X1|A0A0C4F0X1_PUCT1	tr|A0A180GMU7|A0A180GMU7_PUCT1 Uncharacterized protein OS=Puccinia triticina (isolate 1-1 / race 1 (BBBD)) GN=PTTG_06741 PE=3 SV=1;tr|A0A0C4F0X1|A0A0C4F0X1_PUCT1 Uncharacterized protein OS=Puccinia triticina (isolate 1-1 / race 1 (BBBD)) PE=3 SV=1	3	3	3	15.5	15.5	15.5	28.256	128.22	1471000000	12	1.76581	0.0172893	-3.38789	-1.43389	25.6113	24.1019	25.9928	26.5347	24.8787	24.0513	25.2453	24.6956	23.7721	29.0707	28.9306	27.627	A0A180GMU7	403176423	XP_003335072.2	glutathione reductase (NADPH)	Puccinia graminis f. sp. tritici CRL 75-36-700-3	Puccinia graminis f. sp. tritici CRL 75-36-700-3
	+	2.67457	-3.9565	tr|A0A180GN27|A0A180GN27_PUCT1;tr|A0A0C4EU12|A0A0C4EU12_PUCT1	tr|A0A180GN27|A0A180GN27_PUCT1;tr|A0A0C4EU12|A0A0C4EU12_PUCT1	tr|A0A180GN27|A0A180GN27_PUCT1 40S ribosomal protein S12 OS=Puccinia triticina (isolate 1-1 / race 1 (BBBD)) GN=PTTG_04291 PE=3 SV=1;tr|A0A0C4EU12|A0A0C4EU12_PUCT1 40S ribosomal protein S12 OS=Puccinia triticina (isolate 1-1 / race 1 (BBBD)) PE=3 SV=1	4	4	4	18.8	18.8	18.8	22.915	185.34	16708000000	68	3.12834	0.000987013	-6.60296	-2.98766	25.4414	25.9333	25.475	26.5127	24.4604	25.4069	26.6579	25.6393	24.99	31.2825	32.4787	32.4276	A0A180GN27	1034740095	OAV94120.1	small subunit ribosomal protein S12e	Puccinia triticina 1-1 BBBD Race 1	Puccinia triticina 1-1 BBBD Race 1
	+	2.80545	-2.3251	tr|A0A180GNN1|A0A180GNN1_PUCT1;tr|A0A0C4EUC6|A0A0C4EUC6_PUCT1	tr|A0A180GNN1|A0A180GNN1_PUCT1;tr|A0A0C4EUC6|A0A0C4EUC6_PUCT1	tr|A0A180GNN1|A0A180GNN1_PUCT1 Protein transporter SEC23 OS=Puccinia triticina (isolate 1-1 / race 1 (BBBD)) GN=PTTG_04405 PE=4 SV=1;tr|A0A0C4EUC6|A0A0C4EUC6_PUCT1 Uncharacterized protein OS=Puccinia triticina (isolate 1-1 / race 1 (BBBD)) PE=4 SV=1	14	14	14	20	20	20	99.553	36.437	1045500000	31	2.02469	0.0239048	-2.62823	-1.27486	25.2741	25.3651	24.0546	26.2691	25.0006	24.839	26.1143	25.7918	26.6998	28.6632	27.689	27.6411	A0A180GNN1	1034739885	OAV93912.1	protein transporter SEC23	Puccinia triticina 1-1 BBBD Race 1	Puccinia triticina 1-1 BBBD Race 1
	+	3.1509	-4.61831	tr|A0A180GP14|A0A180GP14_PUCT1	tr|A0A180GP14|A0A180GP14_PUCT1	tr|A0A180GP14|A0A180GP14_PUCT1 Uncharacterized protein (Fragment) OS=Puccinia triticina (isolate 1-1 / race 1 (BBBD)) GN=PTTG_11739 PE=4 SV=1	7	7	7	23.7	23.7	23.7	56.205	26.557	522330000	19	2.55965	0.0319912	-2.17489	-1.18823	24.9843	25.3579	25.7548	24.8686	25.1136	24.4087	24.1881	24.676	24.706	27.4352	26.936	26.5444	A0A180GP14	1034740174	OAV94198.1	hypothetical protein PTTG_11739, partial	Puccinia triticina 1-1 BBBD Race 1	Puccinia triticina 1-1 BBBD Race 1
	+	4.14131	-2.50556	tr|A0A180GPB2|A0A180GPB2_PUCT1;tr|A0A0C4EQG3|A0A0C4EQG3_PUCT1	tr|A0A180GPB2|A0A180GPB2_PUCT1;tr|A0A0C4EQG3|A0A0C4EQG3_PUCT1	tr|A0A180GPB2|A0A180GPB2_PUCT1 Uncharacterized protein OS=Puccinia triticina (isolate 1-1 / race 1 (BBBD)) GN=PTTG_03022 PE=4 SV=1;tr|A0A0C4EQG3|A0A0C4EQG3_PUCT1 Uncharacterized protein OS=Puccinia triticina (isolate 1-1 / race 1 (BBBD)) PE=4 SV=1	17	17	15	57.4	57.4	54	51.712	237.86	5475400000	66	3.20354	0.0052381	-4.59765	-2.3306	26.1155	26.0889	23.5344	25.7951	26.4471	25.0309	23.4883	24.6685	25.5145	29.9495	30.7691	30.3475	A0A180GPB2	1244195845	PBP20617.1	putative replication protein A 32 kDa subunit	Diplocarpon rosae	Diplocarpon rosae
	+	3.4425	-4.32596	tr|A0A180GQ53|A0A180GQ53_PUCT1;tr|A0A0C4ESJ8|A0A0C4ESJ8_PUCT1;tr|A0A180GQ10|A0A180GQ10_PUCT1	tr|A0A180GQ53|A0A180GQ53_PUCT1;tr|A0A0C4ESJ8|A0A0C4ESJ8_PUCT1	tr|A0A180GQ53|A0A180GQ53_PUCT1 Proteasome subunit alpha type OS=Puccinia triticina (isolate 1-1 / race 1 (BBBD)) GN=PTTG_03777 PE=3 SV=1;tr|A0A0C4ESJ8|A0A0C4ESJ8_PUCT1 Proteasome endopeptidase complex OS=Puccinia triticina (isolate 1-1 / race 1 (BBBD)) PE=	3	3	3	19.8	19.8	19.8	28.719	54.812	804410000	15	2.65604	0.0147159	-2.79614	-1.47149	24.7497	25.2957	26.5255	25.58	24.5258	24.6088	24.0632	24.4887	25.4616	27.2792	27.9709	27.8529	A0A180GQ53	1034740538	OAV94558.1	20S proteasome subunit alpha 7	Puccinia triticina 1-1 BBBD Race 1	Puccinia triticina 1-1 BBBD Race 1
	+	3.34912	-5.34375	tr|A0A180GQ89|A0A180GQ89_PUCT1;tr|A0A0C4EXF1|A0A0C4EXF1_PUCT1	tr|A0A180GQ89|A0A180GQ89_PUCT1;tr|A0A0C4EXF1|A0A0C4EXF1_PUCT1	tr|A0A180GQ89|A0A180GQ89_PUCT1 Uncharacterized protein OS=Puccinia triticina (isolate 1-1 / race 1 (BBBD)) GN=PTTG_05499 PE=4 SV=1;tr|A0A0C4EXF1|A0A0C4EXF1_PUCT1 Uncharacterized protein OS=Puccinia triticina (isolate 1-1 / race 1 (BBBD)) PE=4 SV=1	9	9	9	25.9	25.9	25.9	60.421	197.48	1797300000	35	2.4704	0.0190154	-2.61185	-1.36078	26.0194	25.0121	25.3062	25.8943	27.0125	25.7817	24.8119	25.7886	25.6722	29.0532	28.9116	28.5594	A0A180GQ89	331224519	XP_003324931.1	stress-induced-phosphoprotein 1	Puccinia graminis f. sp. tritici CRL 75-36-700-3	Puccinia graminis f. sp. tritici CRL 75-36-700-3
	+	2.97223	-4.82546	tr|A0A180GQE1|A0A180GQE1_PUCT1;tr|A0A0C4EWF3|A0A0C4EWF3_PUCT1;A0A1D6ALY2;A0A1D6B6V8;A0A1D6ALY3;A0A1D6ACB0;A0A1D6B6V6;A0A1D6ACB1	tr|A0A180GQE1|A0A180GQE1_PUCT1;tr|A0A0C4EWF3|A0A0C4EWF3_PUCT1	tr|A0A180GQE1|A0A180GQE1_PUCT1 Arginyl-tRNA synthetase OS=Puccinia triticina (isolate 1-1 / race 1 (BBBD)) GN=PTTG_05148 PE=3 SV=1;tr|A0A0C4EWF3|A0A0C4EWF3_PUCT1 Uncharacterized protein OS=Puccinia triticina (isolate 1-1 / race 1 (BBBD)) PE=3 SV=1	10	10	10	28.2	28.2	28.2	53.906	39.621	1397300000	25	2.17303	0.0237915	-2.53537	-1.27298	25.2403	24.6524	26.0269	25.974	25.1283	26.6779	24.3306	25.1537	25.4269	28.4639	28.8122	28.1102	A0A180GQE1	1034740628	OAV94648.1	arginyl-tRNA synthetase	Puccinia triticina 1-1 BBBD Race 1	Puccinia triticina 1-1 BBBD Race 1
	+	4.1266	-4.50834	tr|A0A180GQH9|A0A180GQH9_PUCT1;tr|A0A0C4ESX7|A0A0C4ESX7_PUCT1	tr|A0A180GQH9|A0A180GQH9_PUCT1;tr|A0A0C4ESX7|A0A0C4ESX7_PUCT1	tr|A0A180GQH9|A0A180GQH9_PUCT1 Carbonic anhydrase OS=Puccinia triticina (isolate 1-1 / race 1 (BBBD)) GN=PTTG_03906 PE=3 SV=1;tr|A0A0C4ESX7|A0A0C4ESX7_PUCT1 Carbonic anhydrase OS=Puccinia triticina (isolate 1-1 / race 1 (BBBD)) PE=3 SV=1	4	4	4	40.3	40.3	40.3	16.159	52.727	2725000000	22	2.67457	0.00839024	-3.9565	-1.92074	25.9213	24.1444	26.0518	25.0534	25.8008	24.9003	24.6723	24.543	25.3592	29.4818	29.8786	28.2636	A0A180GQH9	1021805427	KZO97673.1	carbonic anhydrase	Calocera viscosa TUFC12733	Calocera viscosa TUFC12733
	+	3.09463	-5.46961	tr|A0A180GQL8|A0A180GQL8_PUCT1;tr|A0A0C4EST7|A0A0C4EST7_PUCT1;tr|A0A180FWQ4|A0A180FWQ4_PUCT1	tr|A0A180GQL8|A0A180GQL8_PUCT1;tr|A0A0C4EST7|A0A0C4EST7_PUCT1	tr|A0A180GQL8|A0A180GQL8_PUCT1 Uncharacterized protein OS=Puccinia triticina (isolate 1-1 / race 1 (BBBD)) GN=PTTG_03866 PE=4 SV=1;tr|A0A0C4EST7|A0A0C4EST7_PUCT1 Uncharacterized protein OS=Puccinia triticina (isolate 1-1 / race 1 (BBBD)) PE=4 SV=1	11	11	11	23	23	23	84.851	55.564	884980000	24	2.80545	0.0224541	-2.3251	-1.28904	25.2515	25.2059	24.4972	25.8094	25.0489	25.6351	26.0334	24.8281	25.8694	28.1597	27.4728	27.8362	A0A180GQL8	599352838	XP_007403579.1	family 5 glycoside hydrolase	Melampsora larici-populina 98AG31	Melampsora larici-populina 98AG31
	+	2.05983	-2.83259	tr|A0A180GRJ3|A0A180GRJ3_PUCT1;tr|A0A180GSU6|A0A180GSU6_PUCT1;tr|A0A0C4EV08|A0A0C4EV08_PUCT1	tr|A0A180GRJ3|A0A180GRJ3_PUCT1;tr|A0A180GSU6|A0A180GSU6_PUCT1;tr|A0A0C4EV08|A0A0C4EV08_PUCT1	tr|A0A180GRJ3|A0A180GRJ3_PUCT1 Uncharacterized protein OS=Puccinia triticina (isolate 1-1 / race 1 (BBBD)) GN=PTTG_04640 PE=4 SV=1;tr|A0A180GSU6|A0A180GSU6_PUCT1 Uncharacterized protein OS=Puccinia triticina (isolate 1-1 / race 1 (BBBD)) GN=PTTG_04640 PE=4	1	1	1	11.6	11.6	11.6	16.378	66.904	4197500000	23	3.1509	0.0052071	-4.61831	-2.32076	25.5852	25.3731	23.8382	26.3965	24.89	24.9976	24.1253	24.1789	25.0221	30.0011	30.1803	29.9575	A0A180GRJ3	1139911648	GAW05166.1	rna annealing factor	shiitake mushroom	Lentinula edodes
	+	2.35891	-2.79445	tr|A0A180GSD9|A0A180GSD9_PUCT1;tr|A0A0C4EVK7|A0A0C4EVK7_PUCT1	tr|A0A180GSD9|A0A180GSD9_PUCT1;tr|A0A0C4EVK7|A0A0C4EVK7_PUCT1	tr|A0A180GSD9|A0A180GSD9_PUCT1 Carboxypeptidase OS=Puccinia triticina (isolate 1-1 / race 1 (BBBD)) GN=PTTG_04843 PE=3 SV=1;tr|A0A0C4EVK7|A0A0C4EVK7_PUCT1 Uncharacterized protein OS=Puccinia triticina (isolate 1-1 / race 1 (BBBD)) PE=3 SV=1	8	8	8	42.5	42.5	42.5	29.339	19.877	1243100000	19	4.14131	0.0139941	-2.50556	-1.51996	25.7859	26.214	24.1189	25.939	26.1248	25.669	24.0588	27.6464	24.5948	28.4983	28.4681	28.2831	A0A180GSD9	403160202	XP_003320755.2	carboxypeptidase C	Puccinia graminis f. sp. tritici CRL 75-36-700-3	Puccinia graminis f. sp. tritici CRL 75-36-700-3
	+	2.29175	-5.55962	tr|A0A180GSI0|A0A180GSI0_PUCT1;tr|A0A0C4EVJ7|A0A0C4EVJ7_PUCT1	tr|A0A180GSI0|A0A180GSI0_PUCT1;tr|A0A0C4EVJ7|A0A0C4EVJ7_PUCT1	tr|A0A180GSI0|A0A180GSI0_PUCT1 40S ribosomal protein S4 OS=Puccinia triticina (isolate 1-1 / race 1 (BBBD)) GN=PTTG_04832 PE=3 SV=1;tr|A0A0C4EVJ7|A0A0C4EVJ7_PUCT1 40S ribosomal protein S4 OS=Puccinia triticina (isolate 1-1 / race 1 (BBBD)) PE=3 SV=1	10	9	9	46.2	42.6	42.6	27.355	31.896	3192900000	34	3.4425	0.00502857	-4.32596	-2.29371	24.7535	25.2844	25.8372	25.3111	25.7127	24.7441	24.8079	24.9802	24.1284	29.7193	29.956	29.0705	A0A180GSI0	1034741702	OAV95710.1	40S ribosomal protein S4-A	Puccinia triticina 1-1 BBBD Race 1	Puccinia triticina 1-1 BBBD Race 1
	+	3.30949	-4.76161	tr|A0A180GSW6|A0A180GSW6_PUCT1;tr|A0A0C4ETP2|A0A0C4ETP2_PUCT1;tr|A0A180GS39|A0A180GS39_PUCT1;tr|A0A180GSE1|A0A180GSE1_PUCT1;tr|A0A0C4ETN8|A0A0C4ETN8_PUCT1	tr|A0A180GSW6|A0A180GSW6_PUCT1;tr|A0A0C4ETP2|A0A0C4ETP2_PUCT1	tr|A0A180GSW6|A0A180GSW6_PUCT1 Uncharacterized protein OS=Puccinia triticina (isolate 1-1 / race 1 (BBBD)) GN=PTTG_04171 PE=4 SV=1;tr|A0A0C4ETP2|A0A0C4ETP2_PUCT1 Uncharacterized protein OS=Puccinia triticina (isolate 1-1 / race 1 (BBBD)) PE=4 SV=1	14	14	14	45.1	45.1	45.1	38.284	83.523	5190900000	56	3.34912	0.00251852	-5.34375	-2.66665	23.7914	25.5644	26.9344	24.3262	24.903	25.9859	25.7585	24.7362	25.0067	30.6708	30.3415	30.2341	A0A180GSW6	403168093	XP_003327794.2	myo-inositol-1-phosphate synthase	Puccinia graminis f. sp. tritici CRL 75-36-700-3	Puccinia graminis f. sp. tritici CRL 75-36-700-3
	+	2.29331	-3.29595	tr|A0A180GSX8|A0A180GSX8_PUCT1;tr|A0A180GTJ0|A0A180GTJ0_PUCT1	tr|A0A180GSX8|A0A180GSX8_PUCT1;tr|A0A180GTJ0|A0A180GTJ0_PUCT1	tr|A0A180GSX8|A0A180GSX8_PUCT1 Uncharacterized protein OS=Puccinia triticina (isolate 1-1 / race 1 (BBBD)) GN=PTTG_12633 PE=4 SV=1;tr|A0A180GTJ0|A0A180GTJ0_PUCT1 Uncharacterized protein OS=Puccinia triticina (isolate 1-1 / race 1 (BBBD)) GN=PTTG_12633 PE=4	20	20	20	45	45	45	71.967	204.16	5771100000	54	2.97223	0.00526946	-4.82546	-2.33128	23.0513	26.8245	26.0704	25.428	26.3105	24.9882	24.4732	26.8919	24.2244	30.5431	31.0411	29.6189	A0A180GSX8	1358973177	PRQ73958.1	Activator of Hsp90 ATPase	Rhodotorula toruloides	Rhodotorula toruloides
	+	2.62866	-2.98953	tr|A0A180GT09|A0A180GT09_PUCT1	tr|A0A180GT09|A0A180GT09_PUCT1	tr|A0A180GT09|A0A180GT09_PUCT1 Uncharacterized protein OS=Puccinia triticina (isolate 1-1 / race 1 (BBBD)) GN=PTTG_26516 PE=4 SV=1	6	6	6	36.9	36.9	36.9	23.786	111.75	1693600000	22	4.1266	0.00406299	-4.50834	-2.54795	26.7685	25.7451	24.6321	24.5386	24.5418	23.755	26.4031	25.3958	25.281	28.7343	28.7124	28.9138	A0A180GT09	1034741941	OAV95947.1	hypothetical protein PTTG_26516	Puccinia triticina 1-1 BBBD Race 1	Puccinia triticina 1-1 BBBD Race 1
	+	4.11494	-4.6678	tr|A0A180GTY3|A0A180GTY3_PUCT1;tr|A0A0C4ENG7|A0A0C4ENG7_PUCT1	tr|A0A180GTY3|A0A180GTY3_PUCT1;tr|A0A0C4ENG7|A0A0C4ENG7_PUCT1	tr|A0A180GTY3|A0A180GTY3_PUCT1 Phosphotransferase OS=Puccinia triticina (isolate 1-1 / race 1 (BBBD)) GN=PTTG_02313 PE=3 SV=1;tr|A0A0C4ENG7|A0A0C4ENG7_PUCT1 Phosphotransferase OS=Puccinia triticina (isolate 1-1 / race 1 (BBBD)) PE=3 SV=1	13	13	13	31.9	31.9	31.9	56.258	136.2	7032800000	62	3.09463	0.00347368	-5.46961	-2.60435	23.8252	26.4076	26.1909	25.5098	25.9588	24.0993	26.3864	26.8152	25.2386	30.2837	31.0297	30.6633	A0A180GTY3	1034742007	OAV96011.1	hexokinase	Puccinia triticina 1-1 BBBD Race 1	Puccinia triticina 1-1 BBBD Race 1
	+	2.91151	-4.64023	tr|A0A180GU18|A0A180GU18_PUCT1;tr|A0A0C4EVQ7|A0A0C4EVQ7_PUCT1	tr|A0A180GU18|A0A180GU18_PUCT1;tr|A0A0C4EVQ7|A0A0C4EVQ7_PUCT1	tr|A0A180GU18|A0A180GU18_PUCT1 Eukaryotic translation initiation factor 5A OS=Puccinia triticina (isolate 1-1 / race 1 (BBBD)) GN=PTTG_04893 PE=3 SV=1;tr|A0A0C4EVQ7|A0A0C4EVQ7_PUCT1 Eukaryotic translation initiation factor 5A OS=Puccinia triticina (isolate	7	7	7	32	32	32	23.992	12.725	972170000	18	2.05983	0.0195204	-2.83259	-1.35441	23.4357	26.4415	24.9114	25.8152	24.0609	25.7114	24.6927	24.6238	24.8656	28.3164	28.0196	27.7493	A0A180GU18	1034741860	OAV95867.1	eukaryotic translation initiation factor 5A	Puccinia triticina 1-1 BBBD Race 1	Puccinia triticina 1-1 BBBD Race 1
	+	5.07402	-6.99588	tr|A0A180GUC2|A0A180GUC2_PUCT1;tr|A0A0C4F6K2|A0A0C4F6K2_PUCT1;tr|A0A0C4EW78|A0A0C4EW78_PUCT1	tr|A0A180GUC2|A0A180GUC2_PUCT1;tr|A0A0C4F6K2|A0A0C4F6K2_PUCT1	tr|A0A180GUC2|A0A180GUC2_PUCT1 Uncharacterized protein OS=Puccinia triticina (isolate 1-1 / race 1 (BBBD)) GN=PTTG_08772 PE=4 SV=1;tr|A0A0C4F6K2|A0A0C4F6K2_PUCT1 Uncharacterized protein OS=Puccinia triticina (isolate 1-1 / race 1 (BBBD)) PE=4 SV=1	8	8	8	25.6	25.6	25.6	58.13	35.577	1351800000	27	2.35891	0.0176108	-2.79445	-1.41045	23.4543	25.0661	26.4777	25.3468	26.3957	25.0084	25.8537	25.045	25.8914	28.7569	28.4417	27.9358	A0A180GUC2	673528429	CDI54720.1	related to GCY1-galactose-induced protein of aldo/keto reductase family	Melanopsichium pennsylvanicum 4	Melanopsichium pennsylvanicum 4
	+	5.29064	-6.99223	tr|A0A180GUJ4|A0A180GUJ4_PUCT1;tr|A0A0C4ERL0|A0A0C4ERL0_PUCT1	tr|A0A180GUJ4|A0A180GUJ4_PUCT1;tr|A0A0C4ERL0|A0A0C4ERL0_PUCT1	tr|A0A180GUJ4|A0A180GUJ4_PUCT1 Uncharacterized protein OS=Puccinia triticina (isolate 1-1 / race 1 (BBBD)) GN=PTTG_03429 PE=4 SV=1;tr|A0A0C4ERL0|A0A0C4ERL0_PUCT1 Uncharacterized protein OS=Puccinia triticina (isolate 1-1 / race 1 (BBBD)) PE=4 SV=1	10	10	10	36.6	36.6	36.6	29.839	49.232	6544100000	53	2.29175	0.00582199	-5.55962	-2.22465	24.2577	24.9205	25.3381	23.3669	26.7376	24.6327	25.2953	25.6122	24.0511	30.8272	30.2647	30.3242	A0A180GUJ4	331230998	XP_003328163.1	inorganic pyrophosphatase	Puccinia graminis f. sp. tritici CRL 75-36-700-3	Puccinia graminis f. sp. tritici CRL 75-36-700-3
	+	3.14227	-2.57108	tr|A0A180GUQ7|A0A180GUQ7_PUCT1;tr|A0A180GQ32|A0A180GQ32_PUCT1	tr|A0A180GUQ7|A0A180GUQ7_PUCT1;tr|A0A180GQ32|A0A180GQ32_PUCT1	tr|A0A180GUQ7|A0A180GUQ7_PUCT1 Proteasome subunit beta type OS=Puccinia triticina (isolate 1-1 / race 1 (BBBD)) GN=PTTG_03460 PE=3 SV=1;tr|A0A180GQ32|A0A180GQ32_PUCT1 Proteasome subunit beta type OS=Puccinia triticina (isolate 1-1 / race 1 (BBBD)) GN=PTTG_	13	13	13	41.1	41.1	41.1	63.045	113.83	3204800000	62	3.30949	0.00421333	-4.76161	-2.42977	25.0328	26.4568	26.1261	24.9312	25.6054	24.2052	25.6764	24.8608	26.1378	29.477	30.1125	29.4372	A0A180GUQ7	1034742251	OAV96254.1	proteasome component PUP3	Puccinia triticina 1-1 BBBD Race 1	Puccinia triticina 1-1 BBBD Race 1
	+	2.73262	-4.17125	tr|A0A180GUT5|A0A180GUT5_PUCT1;tr|A0A0C4EJT4|A0A0C4EJT4_PUCT1	tr|A0A180GUT5|A0A180GUT5_PUCT1;tr|A0A0C4EJT4|A0A0C4EJT4_PUCT1	tr|A0A180GUT5|A0A180GUT5_PUCT1 Uncharacterized protein OS=Puccinia triticina (isolate 1-1 / race 1 (BBBD)) GN=PTTG_01005 PE=3 SV=1;tr|A0A0C4EJT4|A0A0C4EJT4_PUCT1 Uncharacterized protein OS=Puccinia triticina (isolate 1-1 / race 1 (BBBD)) PE=4 SV=1	7	7	7	23.6	23.6	23.6	35.072	13.422	1606800000	19	2.29331	0.0132431	-3.29595	-1.57572	23.9002	24.7678	26.7261	25.0228	26.6106	24.7679	25.6405	25.2656	24.7797	29.0129	28.7197	28.5567	A0A180GUT5	403166235	XP_003326111.2	ubiquitin-activating enzyme E1	Puccinia graminis f. sp. tritici CRL 75-36-700-3	Puccinia graminis f. sp. tritici CRL 75-36-700-3
	+	3.15812	-4.68504	tr|A0A180GVA1|A0A180GVA1_PUCT1;tr|A0A0C4F3J2|A0A0C4F3J2_PUCT1	tr|A0A180GVA1|A0A180GVA1_PUCT1;tr|A0A0C4F3J2|A0A0C4F3J2_PUCT1	tr|A0A180GVA1|A0A180GVA1_PUCT1 Proteasome subunit alpha type OS=Puccinia triticina (isolate 1-1 / race 1 (BBBD)) GN=PTTG_07672 PE=3 SV=1;tr|A0A0C4F3J2|A0A0C4F3J2_PUCT1 Proteasome endopeptidase complex OS=Puccinia triticina (isolate 1-1 / race 1 (BBBD)) PE=	4	4	4	48.8	48.8	48.8	13.598	30.329	1548400000	25	2.62866	0.0131928	-2.98953	-1.54485	25.1366	24.5196	25.7263	25.7874	25.9957	24.7692	24.6681	25.8729	26.2608	28.9066	28.4398	28.1745	A0A180GVA1	1034742716	OAV96715.1	proteasome subunit alpha type-2	Puccinia triticina 1-1 BBBD Race 1	Puccinia triticina 1-1 BBBD Race 1
	+	2.5299	-4.36044	tr|A0A180GVT4|A0A180GVT4_PUCT1;tr|A0A0C4EMY6|A0A0C4EMY6_PUCT1;tr|A0A180FZW5|A0A180FZW5_PUCT1;tr|A0A180FZN9|A0A180FZN9_PUCT1	tr|A0A180GVT4|A0A180GVT4_PUCT1;tr|A0A0C4EMY6|A0A0C4EMY6_PUCT1	tr|A0A180GVT4|A0A180GVT4_PUCT1 ATP-citrate synthase OS=Puccinia triticina (isolate 1-1 / race 1 (BBBD)) GN=PTTG_02126 PE=3 SV=1;tr|A0A0C4EMY6|A0A0C4EMY6_PUCT1 Uncharacterized protein OS=Puccinia triticina (isolate 1-1 / race 1 (BBBD)) PE=4 SV=1	9	9	9	26.2	26.2	26.2	57.928	180.17	2770300000	29	4.11494	0.00356757	-4.6678	-2.62114	23.9055	26.009	25.8434	24.5442	25.26	24.5941	23.9449	25.0504	25.6219	29.7689	29.2235	29.4092	A0A180GVT4	1034742099	OAV96103.1	ATP citrate (Pro-S)-lyase	Puccinia triticina 1-1 BBBD Race 1	Puccinia triticina 1-1 BBBD Race 1
	+	4.34167	-6.46219	tr|A0A180GVV7|A0A180GVV7_PUCT1;tr|A0A0C4DF11|A0A0C4DF11_PUCT1	tr|A0A180GVV7|A0A180GVV7_PUCT1;tr|A0A0C4DF11|A0A0C4DF11_PUCT1	tr|A0A180GVV7|A0A180GVV7_PUCT1 Uncharacterized protein OS=Puccinia triticina (isolate 1-1 / race 1 (BBBD)) GN=PTTG_09847 PE=4 SV=1;tr|A0A0C4DF11|A0A0C4DF11_PUCT1 Uncharacterized protein OS=Puccinia triticina (isolate 1-1 / race 1 (BBBD)) PE=4 SV=1	8	8	8	52.8	52.8	52.8	17.31	194.49	3575600000	55	2.91151	0.00541304	-4.64023	-2.24334	24.931	26.2979	27.1115	25.0199	26.0585	24.2691	25.4977	24.6343	25.6682	30.0794	29.8834	29.3053	A0A180GVV7	331217596	XP_003321476.1	TdcF protein	Puccinia graminis f. sp. tritici CRL 75-36-700-3	Puccinia graminis f. sp. tritici CRL 75-36-700-3
	+	4.17361	-8.17386	tr|A0A180GW06|A0A180GW06_PUCT1;tr|A0A0C4EJS3|A0A0C4EJS3_PUCT1	tr|A0A180GW06|A0A180GW06_PUCT1;tr|A0A0C4EJS3|A0A0C4EJS3_PUCT1	tr|A0A180GW06|A0A180GW06_PUCT1 Elongation factor 2 OS=Puccinia triticina (isolate 1-1 / race 1 (BBBD)) GN=PTTG_00994 PE=4 SV=1;tr|A0A0C4EJS3|A0A0C4EJS3_PUCT1 Uncharacterized protein OS=Puccinia triticina (isolate 1-1 / race 1 (BBBD)) PE=4 SV=1	15	15	15	60.2	60.2	60.2	41.069	268.06	18833000000	118	5.07402	0	-6.99588	-4.01749	25.5052	25.5481	24.68	25.5806	25.4391	24.8053	26.292	25.316	24.1959	32.2049	32.3361	32.2717	A0A180GW06	1034742548	OAV96549.1	elongation factor 2	Puccinia triticina 1-1 BBBD Race 1	Puccinia triticina 1-1 BBBD Race 1
	+	3.62412	-6.46235	tr|A0A180GW39|A0A180GW39_PUCT1;tr|A0A0C4F024|A0A0C4F024_PUCT1	tr|A0A180GW39|A0A180GW39_PUCT1;tr|A0A0C4F024|A0A0C4F024_PUCT1	tr|A0A180GW39|A0A180GW39_PUCT1 Pyruvate carboxylase OS=Puccinia triticina (isolate 1-1 / race 1 (BBBD)) GN=PTTG_06440 PE=4 SV=1;tr|A0A0C4F024|A0A0C4F024_PUCT1 Pyruvate carboxylase OS=Puccinia triticina (isolate 1-1 / race 1 (BBBD)) PE=4 SV=1	4	4	4	19	19	19	43.784	6.5201	590450000	8	1.75555	0.0458406	-2.29259	-1.09798	25.4514	25.2806	26.0695	24.2098	26.1526	24.6636	25.9065	26.2475	25.0977	27.3576	27.3178	27.2284	A0A180GW39	1034743050	OAV97047.1	pyruvate carboxylase	Puccinia triticina 1-1 BBBD Race 1	Puccinia triticina 1-1 BBBD Race 1
	+	4.86346	-5.59811	tr|A0A180GW97|A0A180GW97_PUCT1;tr|A0A0C4F0K9|A0A0C4F0K9_PUCT1	tr|A0A180GW97|A0A180GW97_PUCT1;tr|A0A0C4F0K9|A0A0C4F0K9_PUCT1	tr|A0A180GW97|A0A180GW97_PUCT1 Uncharacterized protein OS=Puccinia triticina (isolate 1-1 / race 1 (BBBD)) GN=PTTG_06626 PE=4 SV=1;tr|A0A0C4F0K9|A0A0C4F0K9_PUCT1 Uncharacterized protein OS=Puccinia triticina (isolate 1-1 / race 1 (BBBD)) PE=4 SV=1	16	16	16	53.9	53.9	53.9	37.362	200.67	19494000000	144	5.29064	0	-6.99223	-4.0822	25.3722	26.4492	24.7832	24.9441	25.6023	25.2755	25.5913	25.4817	25.9465	32.2138	32.4523	32.1325	A0A180GW97	599356191	XP_007404190.1	La ribonucleoprotein	Melampsora larici-populina 98AG31	Melampsora larici-populina 98AG31
	+	1.43126	-2.71307	tr|A0A180GWF8|A0A180GWF8_PUCT1;tr|A0A0C4EY70|A0A0C4EY70_PUCT1	tr|A0A180GWF8|A0A180GWF8_PUCT1;tr|A0A0C4EY70|A0A0C4EY70_PUCT1	tr|A0A180GWF8|A0A180GWF8_PUCT1 Phosphoribosylformylglycinamidine synthase OS=Puccinia triticina (isolate 1-1 / race 1 (BBBD)) GN=PTTG_26269 PE=3 SV=1;tr|A0A0C4EY70|A0A0C4EY70_PUCT1 Uncharacterized protein OS=Puccinia triticina (isolate 1-1 / race 1 (BBBD))	4	4	2	27.9	27.9	11.3	22.499	40.397	1089800000	21	3.14227	0.0160782	-2.57108	-1.44915	25.1974	25.8902	25.5068	26.0342	25.2838	25.4685	24.093	26.5458	24.877	28.1682	28.4354	27.8962	A0A180GWF8	1034742855	OAV96854.1	phosphoribosylformylglycinamidine synthase	Puccinia triticina 1-1 BBBD Race 1	Puccinia triticina 1-1 BBBD Race 1
	+	4.70008	-2.94407	tr|A0A180GWJ5|A0A180GWJ5_PUCT1;tr|A0A0C4F9S5|A0A0C4F9S5_PUCT1	tr|A0A180GWJ5|A0A180GWJ5_PUCT1;tr|A0A0C4F9S5|A0A0C4F9S5_PUCT1	tr|A0A180GWJ5|A0A180GWJ5_PUCT1 Aspartate aminotransferase OS=Puccinia triticina (isolate 1-1 / race 1 (BBBD)) GN=PTTG_09958 PE=4 SV=1;tr|A0A0C4F9S5|A0A0C4F9S5_PUCT1 Aspartate aminotransferase OS=Puccinia triticina (isolate 1-1 / race 1 (BBBD)) PE=4 SV=1	20	20	20	29.7	29.7	29.7	116.86	184.11	3159800000	62	2.73262	0.00751786	-4.17125	-2.01543	24.9243	25.5154	24.6398	25.7446	24.2502	26.1116	26.9731	25.6729	23.1131	29.5054	29.5346	29.5802	A0A180GWJ5	1034742893	OAV96891.1	aspartate aminotransferase	Puccinia triticina 1-1 BBBD Race 1	Puccinia triticina 1-1 BBBD Race 1
	+	1.97133	-3.14472	tr|A0A180GWP0|A0A180GWP0_PUCT1;tr|A0A0C4ET96|A0A0C4ET96_PUCT1	tr|A0A180GWP0|A0A180GWP0_PUCT1	tr|A0A180GWP0|A0A180GWP0_PUCT1 Uncharacterized protein OS=Puccinia triticina (isolate 1-1 / race 1 (BBBD)) GN=PTTG_04025 PE=3 SV=1	11	11	11	55.6	55.6	55.6	26.894	322.31	3715200000	63	3.15812	0.0054321	-4.68504	-2.34846	25.585	26.0097	26.5276	25.3989	25.432	24.615	24.0614	25.4781	25.1886	30.5722	29.1297	29.7991	A0A180GWP0	331243834	XP_003334559.1	2-isopropylmalate synthase	Puccinia graminis f. sp. tritici CRL 75-36-700-3	Puccinia graminis f. sp. tritici CRL 75-36-700-3
	+	2.27363	-4.00716	tr|A0A180GX40|A0A180GX40_PUCT1	tr|A0A180GX40|A0A180GX40_PUCT1	tr|A0A180GX40|A0A180GX40_PUCT1 Uncharacterized protein OS=Puccinia triticina (isolate 1-1 / race 1 (BBBD)) GN=PTTG_26127 PE=4 SV=1	22	22	22	23.8	23.8	23.8	123.89	83.564	4351000000	51	2.5299	0.00803524	-4.36044	-2.0051	24.8148	25.414	24.1855	26.3408	24.8387	25.6234	25.822	24.719	24.5474	30.3155	30.6252	28.9435	A0A180GX40	599367078	XP_007406221.1	putative protease inhibitor	Melampsora larici-populina 98AG31	Melampsora larici-populina 98AG31
	+	4.10261	-6.3432	tr|A0A180GXF1|A0A180GXF1_PUCT1	tr|A0A180GXF1|A0A180GXF1_PUCT1	tr|A0A180GXF1|A0A180GXF1_PUCT1 Uncharacterized protein OS=Puccinia triticina (isolate 1-1 / race 1 (BBBD)) GN=PTTG_11646 PE=4 SV=1	5	5	5	26.3	26.3	26.3	19.266	187.52	7759800000	68	4.34167	0	-6.46219	-3.51064	23.6565	26.1992	25.584	24.4699	24.8796	23.8027	25.8004	24.306	25.0762	30.6359	31.0917	30.8111	A0A180GXF1	1034742954	OAV96952.1	hypothetical protein PTTG_11646	Puccinia triticina 1-1 BBBD Race 1	Puccinia triticina 1-1 BBBD Race 1
	+	4.06175	-8.31489	tr|A0A180GXH2|A0A180GXH2_PUCT1;tr|A0A0C4F5U9|A0A0C4F5U9_PUCT1	tr|A0A180GXH2|A0A180GXH2_PUCT1	tr|A0A180GXH2|A0A180GXH2_PUCT1 Uncharacterized protein OS=Puccinia triticina (isolate 1-1 / race 1 (BBBD)) GN=PTTG_08503 PE=4 SV=1	33	32	32	43.1	41.7	41.7	93.481	323.31	37278000000	195	4.17361	0	-8.17386	-4.13815	24.7819	24.1827	26.6697	25.241	25.7689	24.2292	25.1922	24.6471	25.4369	33.5251	33.2181	33.0174	A0A180GXH2	599421386	XP_007416582.1	Non-catalytic module family EXPN	Melampsora larici-populina 98AG31	Melampsora larici-populina 98AG31
	+	3.66557	-5.39943	tr|A0A180GXU5|A0A180GXU5_PUCT1	tr|A0A180GXU5|A0A180GXU5_PUCT1	tr|A0A180GXU5|A0A180GXU5_PUCT1 Threonyl-tRNA synthetase OS=Puccinia triticina (isolate 1-1 / race 1 (BBBD)) GN=PTTG_03528 PE=3 SV=1	35	35	6	39.9	39.9	7.6	132.11	323.31	9533700000	140	3.62412	0.00133333	-6.46235	-3.20218	25.1251	25.7112	25.071	24.5851	23.97	25.692	24.7242	24.1731	25.4867	31.2614	31.3913	30.9814	A0A180GXU5	1034742824	OAV96823.1	threonyl-tRNA synthetase	Puccinia triticina 1-1 BBBD Race 1	Puccinia triticina 1-1 BBBD Race 1
	+	4.16483	-2.99772	tr|A0A180GYA2|A0A180GYA2_PUCT1;tr|A0A0C4EKR0|A0A0C4EKR0_PUCT1	tr|A0A180GYA2|A0A180GYA2_PUCT1;tr|A0A0C4EKR0|A0A0C4EKR0_PUCT1	tr|A0A180GYA2|A0A180GYA2_PUCT1 Actin-like protein 3 OS=Puccinia triticina (isolate 1-1 / race 1 (BBBD)) GN=PTTG_01337 PE=3 SV=1;tr|A0A0C4EKR0|A0A0C4EKR0_PUCT1 Uncharacterized protein OS=Puccinia triticina (isolate 1-1 / race 1 (BBBD)) PE=3 SV=1	16	16	16	30.6	30.6	30.6	67.686	107.4	5433100000	56	4.86346	0	-5.59811	-3.25824	25.909	26.0419	26.3985	25.0136	24.5009	25.0898	25.2055	25.315	25.3158	30.3665	30.3351	30.697	A0A180GYA2	1034743813	OAV97805.1	actin-like protein 3	Puccinia triticina 1-1 BBBD Race 1	Puccinia triticina 1-1 BBBD Race 1
	+	3.68284	-4.20427	tr|A0A180GYE4|A0A180GYE4_PUCT1;tr|A0A0C4EYJ8|A0A0C4EYJ8_PUCT1	tr|A0A180GYE4|A0A180GYE4_PUCT1;tr|A0A0C4EYJ8|A0A0C4EYJ8_PUCT1	tr|A0A180GYE4|A0A180GYE4_PUCT1 Polyadenylate-binding protein OS=Puccinia triticina (isolate 1-1 / race 1 (BBBD)) GN=PTTG_05898 PE=3 SV=1;tr|A0A0C4EYJ8|A0A0C4EYJ8_PUCT1 Polyadenylate-binding protein OS=Puccinia triticina (isolate 1-1 / race 1 (BBBD)) PE=3 S	13	13	13	15.8	15.8	15.8	153.43	39.955	845680000	29	1.43126	0.0380124	-2.71307	-1.13909	23.7693	26.6346	25.3558	23.4349	25.3488	26.3257	25.4681	25.5808	26.2264	27.994	27.9816	27.273	A0A180GYE4	983148031	KWU45989.1	polyadenylate binding protein	Rhodotorula sp. JG-1b	Rhodotorula sp. JG-1b
	+	3.39867	-5.38401	tr|A0A180GYG9|A0A180GYG9_PUCT1	tr|A0A180GYG9|A0A180GYG9_PUCT1	tr|A0A180GYG9|A0A180GYG9_PUCT1 Uncharacterized protein OS=Puccinia triticina (isolate 1-1 / race 1 (BBBD)) GN=PTTG_12008 PE=4 SV=1	13	12	12	48.8	46.7	46.7	46.457	38.193	1589500000	29	4.70008	0.0104719	-2.94407	-1.81051	25.4149	25.545	24.396	25.7287	25.9357	25.5309	25.1157	25.2025	25.9872	28.642	28.6161	28.7694	A0A180GYG9	1335266216	PNY24149.1	Protein wos2	Tolypocladium capitatum	Tolypocladium capitatum
	+	3.93211	-4.32254	tr|A0A180GYT3|A0A180GYT3_PUCT1;tr|A0A0C4EHJ2|A0A0C4EHJ2_PUCT1	tr|A0A180GYT3|A0A180GYT3_PUCT1;tr|A0A0C4EHJ2|A0A0C4EHJ2_PUCT1	tr|A0A180GYT3|A0A180GYT3_PUCT1 Uncharacterized protein OS=Puccinia triticina (isolate 1-1 / race 1 (BBBD)) GN=PTTG_00208 PE=4 SV=1;tr|A0A0C4EHJ2|A0A0C4EHJ2_PUCT1 Uncharacterized protein OS=Puccinia triticina (isolate 1-1 / race 1 (BBBD)) PE=4 SV=1	11	11	11	28.2	28.2	28.2	68.933	98.291	1261200000	28	1.97133	0.0171475	-3.14472	-1.4319	25.7721	26.5979	24.8259	24.665	26.2839	24.1525	24.3866	23.9553	24.4981	28.5917	28.2691	27.6747	A0A180GYT3	1183450680	ORY74783.1	P-loop containing nucleoside triphosphate hydrolase protein	Leucosporidium creatinivorum	Leucosporidium creatinivorum
	+	2.24524	-4.04435	tr|A0A180GYX1|A0A180GYX1_PUCT1;tr|A0A0C4EK35|A0A0C4EK35_PUCT1	tr|A0A180GYX1|A0A180GYX1_PUCT1;tr|A0A0C4EK35|A0A0C4EK35_PUCT1	tr|A0A180GYX1|A0A180GYX1_PUCT1 Uncharacterized protein OS=Puccinia triticina (isolate 1-1 / race 1 (BBBD)) GN=PTTG_01108 PE=4 SV=1;tr|A0A0C4EK35|A0A0C4EK35_PUCT1 Uncharacterized protein OS=Puccinia triticina (isolate 1-1 / race 1 (BBBD)) PE=4 SV=1	5	5	5	29.1	29.1	29.1	17.757	28.811	2596900000	16	2.27363	0.0107454	-4.00716	-1.79816	25.0376	24.4671	25.743	24.9847	26.5217	24.047	25.0713	25.6655	24.5312	29.0022	29.3512	29.2215	A0A180GYX1	588259189	XP_006958748.1	DnaJ-domain-containing protein	Wallemia mellicola CBS 633.66	Wallemia mellicola CBS 633.66
	+	4.41785	-6.46379	tr|A0A180GZJ2|A0A180GZJ2_PUCT1	tr|A0A180GZJ2|A0A180GZJ2_PUCT1	tr|A0A180GZJ2|A0A180GZJ2_PUCT1 Uncharacterized protein OS=Puccinia triticina (isolate 1-1 / race 1 (BBBD)) GN=PTTG_03168 PE=4 SV=1	4	4	4	14.4	14.4	14.4	12.453	159.66	9358200000	57	4.10261	0	-6.3432	-3.36621	25.8051	24.7257	26.5681	24.2195	24.9108	25.2793	25.0634	24.2326	24.5075	30.8309	31.5853	31.023	A0A180GZJ2	1034743952	OAV97944.1	hypothetical protein PTTG_03168	Puccinia triticina 1-1 BBBD Race 1	Puccinia triticina 1-1 BBBD Race 1
	+	2.1341	-2.90937	tr|A0A180GZZ7|A0A180GZZ7_PUCT1;tr|A0A0C4EQS2|A0A0C4EQS2_PUCT1	tr|A0A180GZZ7|A0A180GZZ7_PUCT1;tr|A0A0C4EQS2|A0A0C4EQS2_PUCT1	tr|A0A180GZZ7|A0A180GZZ7_PUCT1 Uncharacterized protein OS=Puccinia triticina (isolate 1-1 / race 1 (BBBD)) GN=PTTG_03133 PE=4 SV=1;tr|A0A0C4EQS2|A0A0C4EQS2_PUCT1 Uncharacterized protein OS=Puccinia triticina (isolate 1-1 / race 1 (BBBD)) PE=4 SV=1	8	8	8	41.2	41.2	41.2	35.513	323.31	41625000000	157	4.06175	0	-8.31489	-4.12445	26.1895	27.5544	25.4902	24.3614	26.1092	24.9682	25.5465	27.9377	25.1779	33.4627	33.5664	33.3544	A0A180GZZ7	1022848202	XP_016273315.1	protein of carbohydrate kinase, FGGY type family	Rhodotorula toruloides;Rhodotorula toruloides NP11	Rhodotorula toruloides;Rhodotorula toruloides NP11
	+	3.36703	-3.894	tr|A0A180H029|A0A180H029_PUCT1;tr|A0A0C4DFB7|A0A0C4DFB7_PUCT1	tr|A0A180H029|A0A180H029_PUCT1;tr|A0A0C4DFB7|A0A0C4DFB7_PUCT1	tr|A0A180H029|A0A180H029_PUCT1 Uncharacterized protein OS=Puccinia triticina (isolate 1-1 / race 1 (BBBD)) GN=PTTG_01152 PE=4 SV=1;tr|A0A0C4DFB7|A0A0C4DFB7_PUCT1 Uncharacterized protein OS=Puccinia triticina (isolate 1-1 / race 1 (BBBD)) PE=4 SV=1	29	28	6	43.8	42.6	7.6	87.729	80.418	4645000000	79	3.66557	0.00298901	-5.39943	-2.80859	24.364	24.7611	23.5659	25.0104	24.0515	25.4851	24.4493	25.1456	25.2629	30.2041	30.2953	30.2459	A0A180H029	1405426998	SCZ91122.1	BZ3501_MvSof-1269-A2-R1_Chr2-1g03791	Microbotryum saponariae	Microbotryum saponariae
	+	2.92832	-5.41596	tr|A0A180H0M4|A0A180H0M4_PUCT1;tr|A0A0C4EKG2|A0A0C4EKG2_PUCT1	tr|A0A180H0M4|A0A180H0M4_PUCT1;tr|A0A0C4EKG2|A0A0C4EKG2_PUCT1	tr|A0A180H0M4|A0A180H0M4_PUCT1 Uncharacterized protein OS=Puccinia triticina (isolate 1-1 / race 1 (BBBD)) GN=PTTG_01237 PE=4 SV=1;tr|A0A0C4EKG2|A0A0C4EKG2_PUCT1 Uncharacterized protein OS=Puccinia triticina (isolate 1-1 / race 1 (BBBD)) PE=4 SV=1	10	10	10	32.7	32.7	32.7	49.016	39.566	1181800000	33	4.16483	0.0106277	-2.99772	-1.78948	23.3726	24.5811	24.9342	25.0997	25.0528	25.5501	25.1862	24.2889	25.6805	28.3615	28.2308	28.1034	A0A180H0M4	1183433781	ORY57998.1	Redoxin	Leucosporidium creatinivorum	Leucosporidium creatinivorum
	+	3.66862	-4.05663	tr|A0A180H0Y5|A0A180H0Y5_PUCT1	tr|A0A180H0Y5|A0A180H0Y5_PUCT1	tr|A0A180H0Y5|A0A180H0Y5_PUCT1 Uncharacterized protein OS=Puccinia triticina (isolate 1-1 / race 1 (BBBD)) GN=PTTG_11690 PE=4 SV=1	10	10	10	21.9	21.9	21.9	76.406	124.2	3435300000	36	3.68284	0.00511628	-4.20427	-2.30291	25.1191	26.6444	25.3934	25.1113	26.0116	25.3761	24.8137	24.7284	25.0197	29.3651	30.0073	29.7393	A0A180H0Y5	1034744279	OAV98269.1	hypothetical protein PTTG_11690	Puccinia triticina 1-1 BBBD Race 1	Puccinia triticina 1-1 BBBD Race 1
	+	2.48992	-3.65176	tr|A0A180H1L0|A0A180H1L0_PUCT1;tr|A0A0C4EYB1|A0A0C4EYB1_PUCT1	tr|A0A180H1L0|A0A180H1L0_PUCT1;tr|A0A0C4EYB1|A0A0C4EYB1_PUCT1	tr|A0A180H1L0|A0A180H1L0_PUCT1 Proteasome subunit beta type OS=Puccinia triticina (isolate 1-1 / race 1 (BBBD)) GN=PTTG_05810 PE=3 SV=1;tr|A0A0C4EYB1|A0A0C4EYB1_PUCT1 Uncharacterized protein OS=Puccinia triticina (isolate 1-1 / race 1 (BBBD)) PE=4 SV=1	9	9	9	42.9	42.9	42.9	26.3	189.97	6047900000	50	3.39867	0.00261538	-5.38401	-2.70142	26.2593	24.3332	25.7824	24.2483	25.8416	25.2955	25.3572	25.1289	25.0864	30.2283	30.7689	30.5403	A0A180H1L0	1034744919	OAV98906.1	20S proteasome subunit beta 1	Puccinia triticina 1-1 BBBD Race 1	Puccinia triticina 1-1 BBBD Race 1
	+	2.68554	-3.94399	tr|A0A180H1U7|A0A180H1U7_PUCT1	tr|A0A180H1U7|A0A180H1U7_PUCT1	tr|A0A180H1U7|A0A180H1U7_PUCT1 Guanine nucleotide-binding protein subunit beta-like protein OS=Puccinia triticina (isolate 1-1 / race 1 (BBBD)) GN=PTTG_00389 PE=4 SV=1	22	22	22	28.2	28.2	28.2	121.04	174.67	2532900000	63	3.93211	0.00407742	-4.32254	-2.41574	23.5831	24.8721	25.3703	24.4623	25.3502	25.0533	24.2914	25.5419	25.466	29.4924	29.0595	29.2815	A0A180H1U7	1034744353	OAV98343.1	guanine nucleotide-binding protein subunit beta-like protein	Puccinia triticina 1-1 BBBD Race 1	Puccinia triticina 1-1 BBBD Race 1
	+	1.88072	-2.33797	tr|A0A180H2L6|A0A180H2L6_PUCT1	tr|A0A180H2L6|A0A180H2L6_PUCT1	tr|A0A180H2L6|A0A180H2L6_PUCT1 Uncharacterized protein OS=Puccinia triticina (isolate 1-1 / race 1 (BBBD)) GN=PTTG_25534 PE=4 SV=1	6	6	6	14.7	14.7	14.7	57.73	14.91	580750000	11	2.80825	0.0450201	-1.93431	-1.10389	24.7762	24.9456	24.6219	24.9717	25.3309	25.5614	25.1355	23.2139	24.1827	27.5851	27.1032	26.9787	A0A180H2L6	1034744862	OAV98849.1	hypothetical protein PTTG_25534	Puccinia triticina 1-1 BBBD Race 1	Puccinia triticina 1-1 BBBD Race 1
	+	2.31164	-2.62021	tr|A0A180H2R4|A0A180H2R4_PUCT1;tr|A0A0C4F9Q2|A0A0C4F9Q2_PUCT1;tr|A0A180GUE5|A0A180GUE5_PUCT1;tr|A0A0C4ER01|A0A0C4ER01_PUCT1	tr|A0A180H2R4|A0A180H2R4_PUCT1;tr|A0A0C4F9Q2|A0A0C4F9Q2_PUCT1	tr|A0A180H2R4|A0A180H2R4_PUCT1 Eukaryotic translation initiation factor 2A OS=Puccinia triticina (isolate 1-1 / race 1 (BBBD)) GN=PTTG_09934 PE=3 SV=1;tr|A0A0C4F9Q2|A0A0C4F9Q2_PUCT1 Eukaryotic translation initiation factor 2A OS=Puccinia triticina (isolate	11	11	11	32.3	32.3	32.3	52.487	102.06	3178400000	42	2.24524	0.0107852	-4.04435	-1.79853	25	26.3017	25.3713	25.8751	26.6992	24.1908	25.7025	25.6801	25.3234	29.7694	29.3829	29.7459	A0A180H2R4	1216226163	SCV68746.1	BQ2448_867	Microbotryum intermedium	Microbotryum intermedium
	+	1.90884	-7.44081	tr|A0A180H2R5|A0A180H2R5_PUCT1;tr|A0A180H2T8|A0A180H2T8_PUCT1;tr|A0A0C4EYA2|A0A0C4EYA2_PUCT1	tr|A0A180H2R5|A0A180H2R5_PUCT1;tr|A0A180H2T8|A0A180H2T8_PUCT1;tr|A0A0C4EYA2|A0A0C4EYA2_PUCT1	tr|A0A180H2R5|A0A180H2R5_PUCT1 Protein BMH2 OS=Puccinia triticina (isolate 1-1 / race 1 (BBBD)) GN=PTTG_05801 PE=3 SV=1;tr|A0A180H2T8|A0A180H2T8_PUCT1 Protein BMH2, variant OS=Puccinia triticina (isolate 1-1 / race 1 (BBBD)) GN=PTTG_05801 PE=3 SV=1;tr|A0A0	3	3	3	20.3	20.3	20.3	25.695	50.675	10633000000	52	4.41785	0	-6.46379	-3.53971	24.2726	25.9067	24.2288	24.9575	25.0576	24.4723	26.0322	26.4203	24.8237	31.2245	30.8607	31.7934	A0A180H2R5	1034744931	OAV98918.1	protein BMH2	Puccinia triticina 1-1 BBBD Race 1	Puccinia triticina 1-1 BBBD Race 1
	+	4.05365	-7.0309	tr|A0A180H2Y5|A0A180H2Y5_PUCT1;tr|A0A0C4F6X2|A0A0C4F6X2_PUCT1	tr|A0A180H2Y5|A0A180H2Y5_PUCT1;tr|A0A0C4F6X2|A0A0C4F6X2_PUCT1	tr|A0A180H2Y5|A0A180H2Y5_PUCT1 Uncharacterized protein OS=Puccinia triticina (isolate 1-1 / race 1 (BBBD)) GN=PTTG_08896 PE=4 SV=1;tr|A0A0C4F6X2|A0A0C4F6X2_PUCT1 Uncharacterized protein OS=Puccinia triticina (isolate 1-1 / race 1 (BBBD)) PE=4 SV=1	15	15	15	35	35	35	65.426	44.944	2259100000	37	2.1341	0.0182979	-2.90937	-1.39966	23.2675	24.7636	25.2773	25.8329	27.4432	25.6836	24.7618	23.4294	25.9822	28.9859	29.2609	29.4409	A0A180H2Y5	403160932	XP_003321345.2	diazepam-binding inhibitor (GABA receptor modulator, acyl-CoA-binding protein)	Puccinia graminis f. sp. tritici CRL 75-36-700-3	Puccinia graminis f. sp. tritici CRL 75-36-700-3
	+	2.59869	-3.46259	tr|A0A180H347|A0A180H347_PUCT1;tr|A0A0C4EUM2|A0A0C4EUM2_PUCT1	tr|A0A180H347|A0A180H347_PUCT1;tr|A0A0C4EUM2|A0A0C4EUM2_PUCT1	tr|A0A180H347|A0A180H347_PUCT1 Uncharacterized protein OS=Puccinia triticina (isolate 1-1 / race 1 (BBBD)) GN=PTTG_04503 PE=3 SV=1;tr|A0A0C4EUM2|A0A0C4EUM2_PUCT1 Uncharacterized protein OS=Puccinia triticina (isolate 1-1 / race 1 (BBBD)) PE=3 SV=1	11	11	11	31.6	31.6	31.6	57.032	73.903	2474100000	39	3.36703	0.00765714	-3.894	-2.08981	25.4491	24.7965	23.0635	25.3146	26.0498	24.8057	24.9959	24.6852	24.5781	29.295	29.2096	29.3475	A0A180H347	331241053	XP_003333176.1	1-pyrroline-5-carboxylate dehydrogenase	Puccinia graminis f. sp. tritici CRL 75-36-700-3	Puccinia graminis f. sp. tritici CRL 75-36-700-3
	+	3.2681	-2.57198	tr|A0A180H352|A0A180H352_PUCT1;tr|A0A0C4EUN3|A0A0C4EUN3_PUCT1	tr|A0A180H352|A0A180H352_PUCT1;tr|A0A0C4EUN3|A0A0C4EUN3_PUCT1	tr|A0A180H352|A0A180H352_PUCT1 Uncharacterized protein OS=Puccinia triticina (isolate 1-1 / race 1 (BBBD)) GN=PTTG_04514 PE=4 SV=1;tr|A0A0C4EUN3|A0A0C4EUN3_PUCT1 Uncharacterized protein OS=Puccinia triticina (isolate 1-1 / race 1 (BBBD)) PE=4 SV=1	6	6	6	33.9	33.9	33.9	25.691	323.31	6673400000	61	2.92832	0.00461314	-5.41596	-2.51114	25.2757	25.0875	25.901	24.1057	26.2947	25.1303	24.4769	24.0771	25.7104	30.9441	30.3734	30.4611	A0A180H352	913861226	KNZ54268.1	ribose 5-phosphate isomerase A	Puccinia sorghi	Puccinia sorghi
	+	2.50101	-2.67365	tr|A0A180H359|A0A180H359_PUCT1	tr|A0A180H359|A0A180H359_PUCT1	tr|A0A180H359|A0A180H359_PUCT1 Uncharacterized protein OS=Puccinia triticina (isolate 1-1 / race 1 (BBBD)) GN=PTTG_25377 PE=4 SV=1	1	1	1	12.7	12.7	12.7	13.126	27.464	4128000000	22	3.66862	0.00591489	-4.05663	-2.2328	24.3981	25.1796	25.9513	26.3604	25.3561	25.7523	25.4501	25.217	22.9823	29.6602	29.8933	30.0851	A0A180H359	1034745445	OAV99430.1	hypothetical protein PTTG_25377	Puccinia triticina 1-1 BBBD Race 1	Puccinia triticina 1-1 BBBD Race 1
	+	5.2947	-5.86759	tr|A0A180H399|A0A180H399_PUCT1;tr|A0A0C4F0Q5|A0A0C4F0Q5_PUCT1	tr|A0A180H399|A0A180H399_PUCT1;tr|A0A0C4F0Q5|A0A0C4F0Q5_PUCT1	tr|A0A180H399|A0A180H399_PUCT1 Uncharacterized protein OS=Puccinia triticina (isolate 1-1 / race 1 (BBBD)) GN=PTTG_06672 PE=4 SV=1;tr|A0A0C4F0Q5|A0A0C4F0Q5_PUCT1 Uncharacterized protein OS=Puccinia triticina (isolate 1-1 / race 1 (BBBD)) PE=4 SV=1	6	6	6	28.8	28.8	28.8	23.711	15.247	2507600000	35	2.48992	0.0102898	-3.65176	-1.75628	25.9192	25.3263	24.5435	24.7706	25.6255	26.7167	25.0709	26.5174	25.5463	29.4739	29.0855	29.5087	A0A180H399	913862893	KNZ55232.1	large subunit ribosomal protein L14e	Puccinia sorghi	Puccinia sorghi
	+	2.2454	-2.42723	tr|A0A180H3N6|A0A180H3N6_PUCT1;tr|A0A0C4ENV3|A0A0C4ENV3_PUCT1	tr|A0A180H3N6|A0A180H3N6_PUCT1;tr|A0A0C4ENV3|A0A0C4ENV3_PUCT1	tr|A0A180H3N6|A0A180H3N6_PUCT1 Uncharacterized protein OS=Puccinia triticina (isolate 1-1 / race 1 (BBBD)) GN=PTTG_02450 PE=3 SV=1;tr|A0A0C4ENV3|A0A0C4ENV3_PUCT1 Uncharacterized protein OS=Puccinia triticina (isolate 1-1 / race 1 (BBBD)) PE=3 SV=1	9	9	1	40.6	40.6	5.1	34.726	230.12	2383300000	38	2.68554	0.00835628	-3.94399	-1.91981	25.1544	25.7141	24.4507	25.632	24.2699	25.9979	24.2483	24.2324	26.1824	29.4815	29.3498	28.9005	A0A180H3N6	599414743	XP_007414777.1	carboxypeptidase S1	Melampsora larici-populina 98AG31	Melampsora larici-populina 98AG31
	+	4.92465	-8.00611	tr|A0A180H3P2|A0A180H3P2_PUCT1;tr|A0A0C4EI59|A0A0C4EI59_PUCT1	tr|A0A180H3P2|A0A180H3P2_PUCT1;tr|A0A0C4EI59|A0A0C4EI59_PUCT1	tr|A0A180H3P2|A0A180H3P2_PUCT1 Peptidyl-prolyl cis-trans isomerase OS=Puccinia triticina (isolate 1-1 / race 1 (BBBD)) GN=PTTG_00425 PE=3 SV=1;tr|A0A0C4EI59|A0A0C4EI59_PUCT1 Peptidyl-prolyl cis-trans isomerase OS=Puccinia triticina (isolate 1-1 / race 1 (B	3	3	3	19.3	19.3	19.3	21.564	22.239	1043500000	16	1.88072	0.0376364	-2.33797	-1.14039	24.9534	25.2691	24.4996	25.9129	26.5032	24.8526	25.5166	26.0263	25.6254	27.9755	28.5984	27.7087	A0A180H3P2	1034745273	OAV99258.1	peptidyl-prolyl cis-trans isomerase	Puccinia triticina 1-1 BBBD Race 1	Puccinia triticina 1-1 BBBD Race 1
	+	3.05248	-3.44662	tr|A0A180H3P4|A0A180H3P4_PUCT1;tr|A0A0C4F182|A0A0C4F182_PUCT1	tr|A0A180H3P4|A0A180H3P4_PUCT1;tr|A0A0C4F182|A0A0C4F182_PUCT1	tr|A0A180H3P4|A0A180H3P4_PUCT1 Uncharacterized protein OS=Puccinia triticina (isolate 1-1 / race 1 (BBBD)) GN=PTTG_06852 PE=3 SV=1;tr|A0A0C4F182|A0A0C4F182_PUCT1 Uncharacterized protein OS=Puccinia triticina (isolate 1-1 / race 1 (BBBD)) PE=3 SV=1	10	10	10	22.2	22.2	22.2	70.046	30.3	838150000	22	2.31164	0.0208687	-2.62021	-1.33347	25.1297	25.0738	25.357	25.5357	25.3822	24.1061	26.7148	24.8067	25.6202	27.8086	27.6287	27.4473	A0A180H3P4	331215715	XP_003320537.1	saccharopepsin	Puccinia graminis f. sp. tritici CRL 75-36-700-3	Puccinia graminis f. sp. tritici CRL 75-36-700-3
	+	4.40614	-7.43196	tr|A0A180H3W6|A0A180H3W6_PUCT1;tr|A0A0C4EIF5|A0A0C4EIF5_PUCT1;tr|A0A0C4EIF6|A0A0C4EIF6_PUCT1	tr|A0A180H3W6|A0A180H3W6_PUCT1;tr|A0A0C4EIF5|A0A0C4EIF5_PUCT1;tr|A0A0C4EIF6|A0A0C4EIF6_PUCT1	tr|A0A180H3W6|A0A180H3W6_PUCT1 Uncharacterized protein OS=Puccinia triticina (isolate 1-1 / race 1 (BBBD)) GN=PTTG_00522 PE=4 SV=1;tr|A0A0C4EIF5|A0A0C4EIF5_PUCT1 Uncharacterized protein OS=Puccinia triticina (isolate 1-1 / race 1 (BBBD)) PE=4 SV=1;tr|A0A0C	23	19	16	72	66.7	55.7	29.33	323.31	80952000000	297	1.90884	0.00517647	-7.44081	-2.31235	31.2809	25.887	25.5286	24.3597	29.9124	25.4119	29.9017	29.8757	31.3441	33.7529	33.7992	34.4543	A0A180H3W6	599365444	XP_007405889.1	secreted protein	Melampsora larici-populina 98AG31	Melampsora larici-populina 98AG31
	+	5.62298	-8.76177	tr|A0A180H402|A0A180H402_PUCT1;tr|A0A0C4EI64|A0A0C4EI64_PUCT1	tr|A0A180H402|A0A180H402_PUCT1;tr|A0A0C4EI64|A0A0C4EI64_PUCT1	tr|A0A180H402|A0A180H402_PUCT1 Enolase OS=Puccinia triticina (isolate 1-1 / race 1 (BBBD)) GN=PTTG_00430 PE=3 SV=1;tr|A0A0C4EI64|A0A0C4EI64_PUCT1 Uncharacterized protein OS=Puccinia triticina (isolate 1-1 / race 1 (BBBD)) PE=3 SV=1	11	11	11	78.5	78.5	78.5	12.279	221.15	18899000000	86	4.05365	0	-7.0309	-3.6272	23.8633	25.5165	26.8516	25.7163	24.3855	25.5181	25.5431	24.9472	24.5849	32.0494	32.5173	32.146	A0A180H402	1034745277	OAV99262.1	enolase	Puccinia triticina 1-1 BBBD Race 1	Puccinia triticina 1-1 BBBD Race 1
	+	3.40371	-2.87895	tr|A0A180H475|A0A180H475_PUCT1;tr|A0A0C4EIM7|A0A0C4EIM7_PUCT1;tr|A0A0C4F8W0|A0A0C4F8W0_PUCT1	tr|A0A180H475|A0A180H475_PUCT1;tr|A0A0C4EIM7|A0A0C4EIM7_PUCT1	tr|A0A180H475|A0A180H475_PUCT1 Uncharacterized protein OS=Puccinia triticina (isolate 1-1 / race 1 (BBBD)) GN=PTTG_25220 PE=3 SV=1;tr|A0A0C4EIM7|A0A0C4EIM7_PUCT1 Uncharacterized protein OS=Puccinia triticina (isolate 1-1 / race 1 (BBBD)) PE=4 SV=1	12	12	2	24.7	24.7	3.6	60.304	27.246	1426800000	24	2.59869	0.0109066	-3.46259	-1.71976	23.8101	26.7401	26.9796	24.6195	24.6298	26.1364	25.7627	25.0647	24.6064	28.7867	28.5113	28.4756	A0A180H475	599115970	XP_007386031.1	glucooligosaccharide oxidase	Punctularia strigosozonata HHB-11173 SS5	Punctularia strigosozonata HHB-11173 SS5
	+	3.1232	-3.51554	tr|A0A180H4B6|A0A180H4B6_PUCT1	tr|A0A180H4B6|A0A180H4B6_PUCT1	tr|A0A180H4B6|A0A180H4B6_PUCT1 Uncharacterized protein OS=Puccinia triticina (isolate 1-1 / race 1 (BBBD)) GN=PTTG_11722 PE=4 SV=1	7	7	7	25.7	25.7	25.7	38.789	27.375	1048800000	16	3.2681	0.0150255	-2.57198	-1.46595	24.5951	27.2324	25.7241	25.2585	25.6927	25.3197	25.0864	25.9165	24.0271	27.6318	27.9781	28.377	A0A180H4B6	1034745667	OAV99651.1	hypothetical protein PTTG_11722	Puccinia triticina 1-1 BBBD Race 1	Puccinia triticina 1-1 BBBD Race 1
	+	3.50855	-5.21112	tr|A0A180H4G4|A0A180H4G4_PUCT1;tr|A0A0C4EL47|A0A0C4EL47_PUCT1	tr|A0A180H4G4|A0A180H4G4_PUCT1	tr|A0A180H4G4|A0A180H4G4_PUCT1 Proteasome subunit alpha type OS=Puccinia triticina (isolate 1-1 / race 1 (BBBD)) GN=PTTG_01480 PE=3 SV=1	1	1	1	20.4	20.4	20.4	10.335	116.52	1542000000	30	2.50101	0.0183622	-2.67365	-1.39167	26.6201	24.6898	24.8972	25.2787	25.8413	26.147	26.0908	24.4259	25.3787	28.7439	28.7859	27.7582	A0A180H4G4	1034745894	OAV99877.1	proteasome subunit alpha type-6	Puccinia triticina 1-1 BBBD Race 1	Puccinia triticina 1-1 BBBD Race 1
	+	2.03198	-2.5658	tr|A0A180H4R6|A0A180H4R6_PUCT1;tr|A0A0C4ET58|A0A0C4ET58_PUCT1	tr|A0A180H4R6|A0A180H4R6_PUCT1;tr|A0A0C4ET58|A0A0C4ET58_PUCT1	tr|A0A180H4R6|A0A180H4R6_PUCT1 Histidine biosynthesis trifunctional protein OS=Puccinia triticina (isolate 1-1 / race 1 (BBBD)) GN=PTTG_03987 PE=3 SV=1;tr|A0A0C4ET58|A0A0C4ET58_PUCT1 Uncharacterized protein OS=Puccinia triticina (isolate 1-1 / race 1 (BBBD	6	6	6	36.7	36.7	36.7	16.47	136.16	10408000000	40	5.2947	0	-5.86759	-3.49635	24.826	24.693	25.6486	25.3673	25.3899	25.3779	24.1151	25.4355	25.9269	30.9513	31.22	31.5666	A0A180H4R6	913868600	KNZ58575.1	histidinol dehydrogenase	Puccinia sorghi	Puccinia sorghi
	+	2.61584	-4.20527	tr|A0A180H4U5|A0A180H4U5_PUCT1;tr|A0A0C4F154|A0A0C4F154_PUCT1	tr|A0A180H4U5|A0A180H4U5_PUCT1;tr|A0A0C4F154|A0A0C4F154_PUCT1	tr|A0A180H4U5|A0A180H4U5_PUCT1 Uncharacterized protein OS=Puccinia triticina (isolate 1-1 / race 1 (BBBD)) GN=PTTG_06824 PE=3 SV=1;tr|A0A0C4F154|A0A0C4F154_PUCT1 Uncharacterized protein OS=Puccinia triticina (isolate 1-1 / race 1 (BBBD)) PE=3 SV=1	7	7	7	23.1	23.1	23.1	53.043	16.935	813770000	21	2.2454	0.0257829	-2.42723	-1.24519	24.1251	24.8096	26.1001	24.7839	26.1512	24.8651	24.7844	25.3295	25.2736	27.593	27.6464	27.8425	A0A180H4U5	403178353	XP_003336794.2	prolyl-tRNA synthetase	Puccinia graminis f. sp. tritici CRL 75-36-700-3	Puccinia graminis f. sp. tritici CRL 75-36-700-3
	+	3.41947	-6.7738	tr|A0A180H4V3|A0A180H4V3_PUCT1;tr|A0A0C4F9L5|A0A0C4F9L5_PUCT1;tr|A0A0C4EID9|A0A0C4EID9_PUCT1;tr|A0A0C4EID7|A0A0C4EID7_PUCT1;tr|A0A180G2W4|A0A180G2W4_PUCT1	tr|A0A180H4V3|A0A180H4V3_PUCT1;tr|A0A0C4F9L5|A0A0C4F9L5_PUCT1	tr|A0A180H4V3|A0A180H4V3_PUCT1 Uncharacterized protein OS=Puccinia triticina (isolate 1-1 / race 1 (BBBD)) GN=PTTG_25262 PE=4 SV=1;tr|A0A0C4F9L5|A0A0C4F9L5_PUCT1 Uncharacterized protein OS=Puccinia triticina (isolate 1-1 / race 1 (BBBD)) PE=4 SV=1	6	6	6	56	56	56	17.91	295.51	35898000000	116	4.92465	0	-8.00611	-4.44507	24.1823	25.0146	25.0407	25.0208	24.8498	25.253	27.977	24.6209	26.0113	32.4951	33.3722	33.2746	A0A180H4V3	31087954	AAP42832.1	chitinase	Puccinia triticina	Puccinia triticina
	+	1.94568	-3.71254	tr|A0A180H697|A0A180H697_PUCT1;tr|A0A0C4ELA7|A0A0C4ELA7_PUCT1	tr|A0A180H697|A0A180H697_PUCT1;tr|A0A0C4ELA7|A0A0C4ELA7_PUCT1	tr|A0A180H697|A0A180H697_PUCT1 Uncharacterized protein OS=Puccinia triticina (isolate 1-1 / race 1 (BBBD)) GN=PTTG_01541 PE=4 SV=1;tr|A0A0C4ELA7|A0A0C4ELA7_PUCT1 Uncharacterized protein OS=Puccinia triticina (isolate 1-1 / race 1 (BBBD)) PE=4 SV=1	7	7	7	25.8	25.8	25.8	46.722	174.7	1445300000	33	3.05248	0.0105909	-3.44662	-1.82567	25.7375	23.7537	25.1768	24.7822	24.7287	24.5401	26.2792	25.6628	24.5856	28.4457	28.573	27.3721	A0A180H697	1022861811	XP_016270626.1	translation initiation factor eIF-4B	Rhodotorula toruloides;Rhodotorula toruloides NP11	Rhodotorula toruloides;Rhodotorula toruloides NP11
	+	1.52448	-3.23855	W5GBB3;U5HTF2;Q4L1A3;W5ENW2;W5ECQ4;W5DVP9	W5GBB3;U5HTF2	tr|W5GBB3|W5GBB3_WHEAT Eukaryotic translation initiation factor 3 subunit G OS=Triticum aestivum PE=3 SV=1;tr|U5HTF2|U5HTF2_WHEAT Eukaryotic translation initiation factor 3 subunit G OS=Triticum aestivum GN=eIF3g PE=2 SV=1	8	8	1	34.4	34.4	11.9	24.825	180.42	31811000000	149	4.40614	0	-7.43196	-3.95848	23.8903	25.3798	24.882	25.5912	26.1315	24.9707	25.4685	25.7315	24.975	32.6746	33.2688	33.0459	W5GBB3	1149770867	XP_020149734.1	eukaryotic translation initiation factor 3 subunit G	bread wheat;Aegilops tauschii subsp. tauschii	Triticum aestivum;Aegilops tauschii subsp. tauschii
	+	1.57079	-2.81636	W4ZLL1;A0A1D5SHT8;A0A1D5RUX8	W4ZLL1;A0A1D5SHT8;A0A1D5RUX8	tr|W4ZLL1|W4ZLL1_WHEAT Uncharacterized protein OS=Triticum aestivum PE=4 SV=1;tr|A0A1D5SHT8|A0A1D5SHT8_WHEAT Uncharacterized protein OS=Triticum aestivum PE=4 SV=1;tr|A0A1D5RUX8|A0A1D5RUX8_WHEAT Uncharacterized protein OS=Triticum aestivum PE=4 SV=1	27	27	27	67.9	67.9	67.9	47.379	323.31	82518000000	344	5.62298	0	-8.76177	-5.09354	25.3587	25.2394	25.5467	25.2201	25.7833	25.4497	27.0092	27.1947	26.2073	34.5137	34.2196	34.005	W4ZLL1	1149722683	XP_020187242.1	probable prefoldin subunit 5	Aegilops tauschii subsp. tauschii	Aegilops tauschii subsp. tauschii
	+	1.78867	-3.22961	W4ZTR7	W4ZTR7	tr|W4ZTR7|W4ZTR7_WHEAT Proteasome subunit beta type OS=Triticum aestivum PE=3 SV=1	9	9	9	22.7	22.7	22.7	56.579	93.548	1409500000	21	3.40371	0.0122958	-2.87895	-1.63312	25.1744	25.8512	26.9374	25.5586	25.8942	25.0544	24.77	23.9911	24.4842	28.5063	28.4487	28.1891	W4ZTR7	1149706121	XP_020179175.1	proteasome subunit beta type-6-like	Aegilops tauschii subsp. tauschii	Aegilops tauschii subsp. tauschii
	+	3.61207	2.72762	W5A999	W5A999	tr|W5A999|W5A999_WHEAT Uncharacterized protein OS=Triticum aestivum PE=4 SV=1	4	4	4	26.7	26.7	26.7	21.657	9.808	1456000000	14	3.1232	0.00947287	-3.51554	-1.87074	24.0078	26.7439	26.5177	24.3785	25.2927	25.5651	24.1668	24.5846	25.8779	28.8369	28.5047	28.4413	W5A999	1149800563	XP_020160694.1	polygalacturonase inhibitor-like	Aegilops tauschii subsp. tauschii	Aegilops tauschii subsp. tauschii
	+	1.30932	-2.70291	W5AQY6;W5BDE0	W5AQY6;W5BDE0	tr|W5AQY6|W5AQY6_WHEAT Peroxidase OS=Triticum aestivum PE=3 SV=1;tr|W5BDE0|W5BDE0_WHEAT Peroxidase OS=Triticum aestivum PE=3 SV=1	11	10	10	48.6	44.9	44.9	27.06	153.8	4605800000	50	3.50855	0.00254206	-5.21112	-2.6762	25.4054	26.2387	24.998	24.8307	25.6201	24.2241	24.7779	25.9856	25.1481	30.3781	30.1955	29.7346	W5AQY6	1149836824	XP_020174746.1	peroxidase 2-like	Aegilops tauschii subsp. tauschii	Aegilops tauschii subsp. tauschii
	+	1.24623	-3.20359	W5ARU5	W5ARU5	tr|W5ARU5|W5ARU5_WHEAT Uncharacterized protein OS=Triticum aestivum PE=4 SV=1	12	12	12	26.7	26.7	26.7	90.49	32.056	726840000	26	2.03198	0.0256597	-2.5658	-1.2543	25.4857	25.6899	26.2872	24.1926	25.871	24.4513	24.8248	24.8374	25.0534	27.3664	27.6975	27.1484	W5ARU5	#N/A	#N/A	#N/A	#N/A	#N/A
	+	1.07455	-3.68948	W5ASW3	W5ASW3	tr|W5ASW3|W5ASW3_WHEAT Uncharacterized protein OS=Triticum aestivum PE=4 SV=1	18	18	18	37.1	37.1	37.1	74.249	109.63	3457100000	64	2.61584	0.0084329	-4.20527	-1.98645	25.8807	25.6158	25.2545	26.2715	26.0835	24.3375	25.1635	24.0759	25.1649	29.7781	29.8325	29.6977	W5ASW3	1149743266	XP_020195099.1	chitinase 5-like	bread wheat;Aegilops tauschii subsp. tauschii	Triticum aestivum;Aegilops tauschii subsp. tauschii
	+	2.27118	2.18481	W5BD97;A0A1D5TZW8;A0A1D5TCH5;W5AYW9;A0A1D5UGK2	W5BD97;A0A1D5TZW8	tr|W5BD97|W5BD97_WHEAT Uncharacterized protein OS=Triticum aestivum PE=3 SV=1;tr|A0A1D5TZW8|A0A1D5TZW8_WHEAT Uncharacterized protein OS=Triticum aestivum PE=4 SV=1	12	11	11	34.9	31.6	31.6	45.595	154.31	14271000000	79	3.41947	0.00135714	-6.7738	-3.20621	24.9146	26.1002	26.887	25.2632	25.806	23.7807	25.7864	25.2042	24.2554	31.5337	31.8307	31.807	W5BD97	1149755584	XP_020199715.1	(+)-neomenthol dehydrogenase-like	Aegilops tauschii subsp. tauschii	Aegilops tauschii subsp. tauschii
	+	1.29023	-3.56021	W5C1Y1	W5C1Y1	tr|W5C1Y1|W5C1Y1_WHEAT Uncharacterized protein OS=Triticum aestivum PE=4 SV=1	12	12	12	28.2	28.2	28.2	68.628	110.13	2624100000	43	1.94568	0.0133251	-3.71254	-1.58919	24.4605	24.6336	26.0307	24.316	27.0439	25.5799	25.0158	24.4666	26.1106	29.1745	29.9076	28.9955	W5C1Y1	1149767595	XP_020148557.1	mavicyanin-like	Aegilops tauschii subsp. tauschii	Aegilops tauschii subsp. tauschii
	+	1.42651	-2.94186	W5C8U5;C6ETB0	W5C8U5	tr|W5C8U5|W5C8U5_WHEAT Peroxidase OS=Triticum aestivum PE=3 SV=1	12	12	12	48.4	48.4	48.4	31.458	119.3	4637000000	63	1.52448	0.0206423	-3.23855	-1.30539	24.9891	27.2754	28.81	27.4012	25.2007	24.1222	29.951	28.4018	28.9496	28.9374	28.4647	29.0377	W5C8U5	1149715536	XP_020183803.1	peroxidase 1-like	Aegilops tauschii subsp. tauschii	Aegilops tauschii subsp. tauschii
	+	2.57897	2.88547	W5DRZ5	W5DRZ5	tr|W5DRZ5|W5DRZ5_WHEAT Uncharacterized protein OS=Triticum aestivum PE=4 SV=1	7	7	2	61.3	61.3	14	16.587	66.033	3529200000	64	1.57079	0.0285446	-2.81636	-1.21168	25.1682	26.6185	28.1737	24.3174	27.0873	25.1027	28.8939	28.0949	28.4147	28.3067	28.3014	28.3484	W5DRZ5	937940714	BAT15626.1	Os12g0117800, partial	Japanese rice	Oryza sativa Japonica Group
	+	1.27702	-2.85486	W5DYM3;W5EEZ1;A0A1D5VIL4;A0A1D5X9X0;A0A1D5VIL5	W5DYM3;W5EEZ1;A0A1D5VIL4;A0A1D5X9X0;A0A1D5VIL5	tr|W5DYM3|W5DYM3_WHEAT Uncharacterized protein OS=Triticum aestivum PE=4 SV=1;tr|W5EEZ1|W5EEZ1_WHEAT Uncharacterized protein OS=Triticum aestivum PE=4 SV=1;tr|A0A1D5VIL4|A0A1D5VIL4_WHEAT Uncharacterized protein OS=Triticum aestivum PE=4 SV=1;tr|A0A1D5X9X0|	13	2	0	57.4	4.5	0	26.093	3.9349	3157700000	21	1.78867	0.0182493	-3.22961	-1.39842	25.9977	25.4286	25.4774	23.1696	25.7137	25.1051	28.3846	28.6012	25.6775	27.3777	28.1957	28.1039	W5DYM3	1149804143	XP_020162096.1	ATP-dependent Clp protease ATP-binding subunit CLPT1, chloroplastic-like	Aegilops tauschii subsp. tauschii	Aegilops tauschii subsp. tauschii
	+	0.999659	-3.20651	W5EJS5;W5E1L2;A0A1D5Y013	W5EJS5;W5E1L2;A0A1D5Y013	tr|W5EJS5|W5EJS5_WHEAT Uncharacterized protein OS=Triticum aestivum PE=4 SV=1;tr|W5E1L2|W5E1L2_WHEAT Uncharacterized protein OS=Triticum aestivum PE=4 SV=1;tr|A0A1D5Y013|A0A1D5Y013_WHEAT Uncharacterized protein OS=Triticum aestivum PE=4 SV=1	4	3	3	16.3	14.2	14.2	35.895	114.31	16797000000	60	3.61207	0.013284	2.72762	1.58561	30.4539	30.2443	30.2015	31.2057	31.3164	31.3287	27.8627	29.8578	29.6657	28.741	28.8029	28.124	W5EJS5	#N/A	#N/A	#N/A	#N/A	#N/A
	+	2.49471	2.48974	W5EDP5;A0A1D5XPA5;A0A1D5XPA6	W5EDP5;A0A1D5XPA5;A0A1D5XPA6	tr|W5EDP5|W5EDP5_WHEAT Uncharacterized protein OS=Triticum aestivum PE=4 SV=1;tr|A0A1D5XPA5|A0A1D5XPA5_WHEAT Uncharacterized protein OS=Triticum aestivum PE=4 SV=1;tr|A0A1D5XPA6|A0A1D5XPA6_WHEAT Uncharacterized protein OS=Triticum aestivum PE=4 SV=1	7	7	1	38.1	38.1	8	34.043	233.38	34714000000	231	1.30932	0.0463651	-2.70291	-1.09562	28.7196	31.7068	29.4929	28.1019	30.0669	29.1873	29.6086	32.1016	30.1304	30.2798	32.3607	32.8242	W5EDP5	1149843040	XP_020177245.1	probable sucrose-phosphate synthase 5	bread wheat;Aegilops tauschii subsp. tauschii	Triticum aestivum;Aegilops tauschii subsp. tauschii
	+	1.82524	-3.65877	W5EGV6	W5EGV6	tr|W5EGV6|W5EGV6_WHEAT Uncharacterized protein OS=Triticum aestivum PE=4 SV=1	8	2	2	44.8	13.8	13.8	22.953	18.971	7825600000	55	1.24623	0.0325293	-3.20359	-1.18348	28.1988	28.9935	29.9879	24.9108	25.451	28.4768	28.0466	29.191	28.642	28.5894	30.2077	29.6523	W5EGV6	1149772153	XP_020150225.1	ABA-inducible protein PHV A1-like	Aegilops tauschii subsp. tauschii	Aegilops tauschii subsp. tauschii
	+	2.61208	-2.25905	W5EQC7	W5EQC7	tr|W5EQC7|W5EQC7_WHEAT Uncharacterized protein OS=Triticum aestivum PE=4 SV=1	6	6	3	39.1	39.1	24.8	24.78	323.31	66970000000	310	1.07455	0.0326	-3.68948	-1.18483	30.7529	30.686	30.4745	30.4396	25.4021	29.9354	34.4286	33.1009	32.94	32.648	31.9676	32.2299	W5EQC7	1149808216	XP_020163679.1	alpha-amylase/trypsin inhibitor-like	Aegilops tauschii subsp. tauschii	Aegilops tauschii subsp. tauschii
	+	2.15801	2.21308	W5ERP5	W5ERP5	tr|W5ERP5|W5ERP5_WHEAT Peroxidase OS=Triticum aestivum PE=3 SV=1	5	5	5	64	64	64	10.675	142.71	1732500000	44	2.23446	0.0474882	-2.0518	-1.08995	26.8642	26.7056	27.1774	25.227	26.1167	26.3714	26.56	26.3824	26.7362	28.115	28.1209	27.6346	W5ERP5	1149763186	XP_020146954.1	peroxidase 4-like	Aegilops tauschii subsp. tauschii	Aegilops tauschii subsp. tauschii
	+	1.52172	-3.53882	W5F5Y6	W5F5Y6	tr|W5F5Y6|W5F5Y6_WHEAT Peroxidase OS=Triticum aestivum PE=3 SV=1	10	10	10	41.2	41.2	41.2	33.438	26.178	2067000000	24	2.27118	0.035782	2.18481	1.15123	24.8472	25.6489	25.2971	27.6432	27.4789	26.6939	28.8631	25.3289	28.9296	25.4468	24.5604	25.2543	W5F5Y6	1149819545	XP_020168340.1	peroxidase 5-like	Aegilops tauschii subsp. tauschii	Aegilops tauschii subsp. tauschii
	+	2.19422	-2.2471	W5FDW8;A0A1D5ZJC0	W5FDW8;A0A1D5ZJC0	tr|W5FDW8|W5FDW8_WHEAT UDP-glucose 6-dehydrogenase OS=Triticum aestivum PE=3 SV=1;tr|A0A1D5ZJC0|A0A1D5ZJC0_WHEAT UDP-glucose 6-dehydrogenase OS=Triticum aestivum PE=3 SV=1	10	8	3	37.7	32.1	10.6	33.634	197.75	95963000000	350	2.09146	0.0484756	2.09064	1.08463	33.296	32.5121	32.4547	33.7529	33.3046	33.5852	30.0928	32.424	30.6324	30.6665	31.6832	32.0209	W5FDW8	1149832668	XP_020173165.1	UDP-glucose 6-dehydrogenase 4-like	Aegilops tauschii subsp. tauschii	Aegilops tauschii subsp. tauschii
	+	3.98039	-3.48577	W5FHS7;A0A1D6S4Z2;W5BJA2;A0A1D5TQQ3;A0A1D5UUN3	W5FHS7	tr|W5FHS7|W5FHS7_WHEAT Uncharacterized protein OS=Triticum aestivum PE=4 SV=1	2	2	1	14	14	6.4	17.375	12.663	6371000000	28	1.29023	0.023848	-3.56021	-1.27442	25.4619	25.6321	25.7349	24.3341	25.0004	24.8371	28.9287	29.696	28.905	25.8019	28.9974	30.053	W5FHS7	226500042	NP_001152099.1	carboxyl-terminal peptidase precursor	Zea mays	Zea mays
	+	1.59625	-4.72959	W5FN32	W5FN32	tr|W5FN32|W5FN32_WHEAT Uncharacterized protein OS=Triticum aestivum PE=4 SV=1	11	5	5	46.5	23.1	23.1	33.081	217.78	10492000000	91	1.42651	0.0307841	-2.94186	-1.19606	28.1229	25.0202	26.5665	27.9532	24.8897	26.9018	31.6937	31.3487	28.3964	30.1602	29.0165	29.3936	W5FN32	1149848101	XP_020192437.1	alpha-amylase/trypsin inhibitor-like	Aegilops tauschii subsp. tauschii	Aegilops tauschii subsp. tauschii
	+	1.72427	-2.87982	W5FNH7;A0A1D6CBS3	W5FNH7;A0A1D6CBS3	tr|W5FNH7|W5FNH7_WHEAT Uncharacterized protein OS=Triticum aestivum PE=4 SV=1;tr|A0A1D6CBS3|A0A1D6CBS3_WHEAT Uncharacterized protein OS=Triticum aestivum PE=4 SV=1	3	3	1	15.7	15.7	3.8	33.114	25.498	2437300000	41	2.57897	0.0146783	2.88547	1.49267	27.738	27.9878	27.7928	27.6507	27.7816	27.9928	25.6225	25.0643	26.1176	25.1431	25.5174	24.1081	W5FNH7	1149714934	XP_020183506.1	alpha-amylase/trypsin inhibitor-like	Aegilops tauschii subsp. tauschii	Aegilops tauschii subsp. tauschii
	+	1.83136	-2.92378	W5FPB3;A0A1D6A4N0;A0A1D6A4N1	W5FPB3;A0A1D6A4N0;A0A1D6A4N1	tr|W5FPB3|W5FPB3_WHEAT Uncharacterized protein OS=Triticum aestivum PE=4 SV=1;tr|A0A1D6A4N0|A0A1D6A4N0_WHEAT Uncharacterized protein OS=Triticum aestivum PE=4 SV=1;tr|A0A1D6A4N1|A0A1D6A4N1_WHEAT Uncharacterized protein OS=Triticum aestivum PE=4 SV=1	8	8	8	50.2	50.2	50.2	24.557	176.63	4396600000	55	1.27702	0.0411741	-2.85486	-1.12019	26.0288	25.9976	26.8292	24.6294	26.7491	25.5618	29.5574	29.381	29.065	26.8339	29.625	29.0461	W5FPB3	1149798948	XP_020160074.1	probable ureidoglycolate hydrolase	Aegilops tauschii subsp. tauschii	Aegilops tauschii subsp. tauschii
	+	1.45017	-3.9427	W5FV43	W5FV43	tr|W5FV43|W5FV43_WHEAT Uncharacterized protein OS=Triticum aestivum PE=4 SV=1	28	3	3	27.5	3.5	3.5	115.81	10.307	1804100000	30	2.49471	0.0203547	2.48974	1.31471	26.806	27.8388	27.8335	28.1095	27.4742	27.7069	23.7547	24.6325	27.7229	25.8303	25.3555	24.6356	W5FV43	474350477	EMS62968.1	hypothetical protein TRIUR3_17864	Triticum urartu	Triticum urartu
	+	3.40829	-5.67455	W5G0S8	W5G0S8	tr|W5G0S8|W5G0S8_WHEAT Uncharacterized protein OS=Triticum aestivum PE=3 SV=1	8	8	2	38.3	38.3	6.3	17.844	29.475	8060500000	82	1.82524	0.0134209	-3.65877	-1.52819	28.6138	28.1639	29.3448	27.0106	25.0392	24.8985	30.4011	29.8476	29.3877	29.2693	30.3292	28.3261	W5G0S8	1149758983	XP_020200985.1	pathogenesis-related protein 1-like	Aegilops tauschii subsp. tauschii	Aegilops tauschii subsp. tauschii
	+	1.52154	3.80165	W5GB84	W5GB84	tr|W5GB84|W5GB84_WHEAT Uncharacterized protein OS=Triticum aestivum PE=3 SV=1	1	1	1	8.9	8.9	8.9	24.424	195.9	34278000000	90	2.61208	0.0271746	-2.25905	-1.23297	29.7729	30.1646	29.1667	29.0578	29.5462	29.1441	32.854	32.0776	31.1521	31.1306	31.3023	32.0924	W5GB84	474089466	EMS54841.1	Germin-like protein 1-1	Triticum urartu	Triticum urartu
	+	1.30498	-2.97939	W5I4U0	W5I4U0	tr|W5I4U0|W5I4U0_WHEAT Uncharacterized protein OS=Triticum aestivum PE=4 SV=1	5	3	3	23.8	14.4	14.4	33.965	7.3551	906440000	18	2.15801	0.0364	2.21308	1.14468	26.3364	26.5647	26.4706	27.5841	27.0505	26.8208	24.7284	25.4887	26.3035	24.2807	24.9758	25.5598	W5I4U0	474302864	EMS61682.1	putative calcium-binding protein CML7	Triticum urartu	Triticum urartu

## Sheet: Additional Annotation
Hit Rank	Query ID	GI	Ref ID	Pipetide Identity	Length	Evalue	Subject Title	Common Name	Scientific Name
1	A0A0C4ERK3	1034742180	OAV96183.1	100	626	0	6-phosphogluconate dehydrogenase	Puccinia triticina 1-1 BBBD Race 1	Puccinia triticina 1-1 BBBD Race 1
0	A0A180FX95	1034722800	OAV85011.1	100	127	2.59e-88	hypothetical protein PTTG_12725	Puccinia triticina 1-1 BBBD Race 1	Puccinia triticina 1-1 BBBD Race 1
1	A0A180GG57	1034737668	OAV91726.1	100	660	0	glucose-regulated protein	Puccinia triticina 1-1 BBBD Race 1	Puccinia triticina 1-1 BBBD Race 1
1	A0A0C4DF31	1034737969	OAV92022.1	100	351	0	glycerol-3-phosphate dehydrogenase	Puccinia triticina 1-1 BBBD Race 1	Puccinia triticina 1-1 BBBD Race 1
1	A0A0C4DF71	1034738128	OAV92178.1	100	196	5.2e-140	40S ribosomal protein S7	Puccinia triticina 1-1 BBBD Race 1	Puccinia triticina 1-1 BBBD Race 1
6	A0A0C4DF98	403160142	XP_003320696.2	91.639	299	0	20S proteasome subunit alpha 3	Puccinia graminis f. sp. tritici CRL 75-36-700-3	Puccinia graminis f. sp. tritici CRL 75-36-700-3
1	A0A0C4DFB9	1034739912	OAV93939.1	100	379	0	3-isopropylmalate dehydrogenase	Puccinia triticina 1-1 BBBD Race 1	Puccinia triticina 1-1 BBBD Race 1
1	A0A0C4DFI4	1034737965	OAV92018.1	100	112	1.14e-77	cytochrome c	Puccinia triticina 1-1 BBBD Race 1	Puccinia triticina 1-1 BBBD Race 1
10	A0A0C4DFJ3	1317363681	PKY47709.1	68.807	109	8.1e-49	cytochrome b5	Rhizophagus irregularis	Rhizophagus irregularis
1	A0A0C4DFJ4	1034743313	OAV97309.1	100	150	1.27e-104	40S ribosomal protein S19-A	Puccinia triticina 1-1 BBBD Race 1	Puccinia triticina 1-1 BBBD Race 1
13	A0A0C4EH00	599400301	XP_007412216.1	65.478	533	0	subtilisin protease	Melampsora larici-populina 98AG31	Melampsora larici-populina 98AG31
1	A0A0C4EH25	1034736657	OAV90734.1	100	384	0	isocitrate dehydrogenase (NAD+)	Puccinia triticina 1-1 BBBD Race 1	Puccinia triticina 1-1 BBBD Race 1
1	A0A0C4EHC6	1034724239	OAV85110.1	100	172	7.86e-124	60S ribosomal protein L20	Puccinia triticina 1-1 BBBD Race 1	Puccinia triticina 1-1 BBBD Race 1
0	A0A0C4EHF8	1034743454	OAV97449.1	100	347	0	hypothetical protein PTTG_00174	Puccinia triticina 1-1 BBBD Race 1	Puccinia triticina 1-1 BBBD Race 1
2	A0A0C4EHJ6	331213433	XP_003319398.1	97.129	209	2.63e-146	60S ribosomal protein L13	Puccinia graminis f. sp. tritici CRL 75-36-700-3	Puccinia graminis f. sp. tritici CRL 75-36-700-3
7	A0A0C4EHP2	913869194	KNZ58955.1	60.197	407	3.29e-102	proliferating cell nuclear antigen (pcna)	Puccinia sorghi	Puccinia sorghi
1	A0A0C4EHW6	1034744299	OAV98289.1	96.89	611	0	dihydroxy-acid dehydratase	Puccinia triticina 1-1 BBBD Race 1	Puccinia triticina 1-1 BBBD Race 1
1	A0A0C4EI06	1034733290	OAV87609.1	100	523	0	glutathione synthetase	Puccinia triticina 1-1 BBBD Race 1	Puccinia triticina 1-1 BBBD Race 1
1	A0A0C4EI16	1034744346	OAV98336.1	100	190	1.4e-137	50S ribosomal protein L22	Puccinia triticina 1-1 BBBD Race 1	Puccinia triticina 1-1 BBBD Race 1
1	A0A0C4EI22	1034744352	OAV98342.1	100	165	3.99e-114	60S ribosomal protein L12	Puccinia triticina 1-1 BBBD Race 1	Puccinia triticina 1-1 BBBD Race 1
14	A0A0C4EI30	1394851996	PWY98809.1	60.494	81	7.56e-27	RNA-binding domain-containing protein	Testicularia cyperi	Testicularia cyperi
12	A0A0C4EIE4	1022852624	XP_016271995.1	43.133	517	2.28e-103	RAN protein binding protein	Rhodotorula toruloides;Rhodotorula toruloides NP11	Rhodotorula toruloides;Rhodotorula toruloides NP11
1	A0A0C4EIF4	1034745707	OAV99691.1	92.401	579	0	ATP synthase subunit alpha, mitochondrial	Puccinia triticina 1-1 BBBD Race 1	Puccinia triticina 1-1 BBBD Race 1
1	A0A0C4EIJ3	1034745647	OAV99631.1	100	154	3.28e-108	40S ribosomal protein S15	Puccinia triticina 1-1 BBBD Race 1	Puccinia triticina 1-1 BBBD Race 1
7	A0A0C4EIJ4	1488171317	RKP29054.1	63.793	116	2.01e-29	ribosomal protein P2 beta	Metschnikowia bicuspidata	Metschnikowia bicuspidata
7	A0A0C4EIL9	648209072	AIC33794.1	68.432	491	0	peptidase M17, partial	Puccinia cf. psidii AE-2014	Puccinia cf. psidii AE-2014
13	A0A0C4EIQ8	913877868	KNZ61609.1	87.579	475	0	fatty acid synthase subunit beta	Puccinia sorghi	Puccinia sorghi
1	A0A0C4EIT7	1034742330	OAV96332.1	100	363	0	CK1/CK1/CK1-D protein kinase	Puccinia triticina 1-1 BBBD Race 1	Puccinia triticina 1-1 BBBD Race 1
1	A0A0C4EIX2	1034734003	OAV88186.1	100	265	0	40S ribosomal protein S3	Puccinia triticina 1-1 BBBD Race 1	Puccinia triticina 1-1 BBBD Race 1
7	A0A0C4EIX9	814544033	CEQ38927.1	36.667	300	8.95e-21	SPOSA6832_00410, partial	Sporidiobolus salmonicolor	Sporidiobolus salmonicolor
10	A0A0C4EIY4	1394853699	PWZ00508.1	67.742	62	1.06e-24	putative cytochrome b5	Testicularia cyperi	Testicularia cyperi
13	A0A0C4EJ20	1418627110	XP_025351004.1	47.778	180	2.39e-55	acyl-CoA N-acyltransferase	Pseudomicrostroma glucosiphilum	Pseudomicrostroma glucosiphilum
1	A0A0C4EJ23	1034737643	OAV91701.1	100	186	1.87e-136	copper/zinc superoxide dismutase	Puccinia triticina 1-1 BBBD Race 1	Puccinia triticina 1-1 BBBD Race 1
2	A0A0C4EJA2	403161474	XP_003321810.2	93.811	614	0	asparagine synthase (glutamine-hydrolysing)	Puccinia graminis f. sp. tritici CRL 75-36-700-3	Puccinia graminis f. sp. tritici CRL 75-36-700-3
1	A0A0C4EJI8	1034739262	OAV93296.1	100	102	3.22e-70	6,7-dimethyl-8-ribityllumazine synthase	Puccinia triticina 1-1 BBBD Race 1	Puccinia triticina 1-1 BBBD Race 1
1	A0A0C4EJJ3	1034739269	OAV93303.1	100	115	5.94e-76	tubulin binding cofactor A	Puccinia triticina 1-1 BBBD Race 1	Puccinia triticina 1-1 BBBD Race 1
1	A0A0C4EJM3	331228448	XP_003326891.1	100	109	4.13e-71	60S ribosomal protein L30	Puccinia coronata var. avenae f. sp. avenae;Puccinia graminis f. sp. tritici CRL 75-36-700-3;Puccinia triticina 1-1 BBBD Race 1	Puccinia coronata var. avenae f. sp. avenae;Puccinia graminis f. sp. tritici CRL 75-36-700-3;Puccinia triticina 1-1 BBBD Race 1
2	A0A0C4EJM4	331219046	XP_003322200.1	91.35	474	0	D-3-phosphoglycerate dehydrogenase	Puccinia graminis f. sp. tritici CRL 75-36-700-3	Puccinia graminis f. sp. tritici CRL 75-36-700-3
2	A0A0C4EJR8	331226950	XP_003326144.1	100	97	1.61e-62	40S ribosomal protein S16	Puccinia coronata var. avenae f. sp. avenae;Puccinia graminis f. sp. tritici CRL 75-36-700-3	Puccinia coronata var. avenae f. sp. avenae;Puccinia graminis f. sp. tritici CRL 75-36-700-3
1	A0A0C4EK03	1034743783	OAV97776.1	100	677	0	hsp70-like protein	Puccinia triticina 1-1 BBBD Race 1	Puccinia triticina 1-1 BBBD Race 1
0	A0A0C4EK24	1034743756	OAV97749.1	100	219	2.78e-146	hypothetical protein PTTG_01097	Puccinia triticina 1-1 BBBD Race 1	Puccinia triticina 1-1 BBBD Race 1
2	A0A0C4EKB4	909599928	KNE90477.1	79.231	390	0	seryl-tRNA synthetase	Puccinia striiformis;Puccinia striiformis f. sp. tritici PST-78	Puccinia striiformis;Puccinia striiformis f. sp. tritici PST-78
12	A0A0C4EKE7	1022868175	XP_016269721.1	46.448	549	8.3e-132	protein of heat shock protein 70 family	Rhodotorula toruloides;Rhodotorula toruloides NP11	Rhodotorula toruloides;Rhodotorula toruloides NP11
1	A0A0C4EKH7	1034735168	OAV89283.1	100	346	0	protein NMT1	Puccinia triticina 1-1 BBBD Race 1	Puccinia triticina 1-1 BBBD Race 1
11	A0A0C4EKM7	599413465	XP_007414481.1	55.498	582	0	multi-copper oxidase laccase-like protein	Melampsora larici-populina 98AG31	Melampsora larici-populina 98AG31
1	A0A0C4EKV3	403175893	XP_003334642.2	88.889	396	0	L-iditol 2-dehydrogenase	Puccinia graminis f. sp. tritici CRL 75-36-700-3	Puccinia graminis f. sp. tritici CRL 75-36-700-3
15	A0A0C4EKV4	1183454026	ORY78099.1	47.502	1061	0	armadillo-type protein	Leucosporidium creatinivorum	Leucosporidium creatinivorum
1	A0A0C4EKX2	403162357	XP_003322588.2	100	155	2.09e-109	40S ribosomal protein S18	Puccinia striiformis;Puccinia coronata var. avenae f. sp. avenae;Puccinia graminis f. sp. tritici CRL 75-36-700-3;Puccinia triticina 1-1 BBBD Race 1	Puccinia striiformis;Puccinia coronata var. avenae f. sp. avenae;Puccinia graminis f. sp. tritici CRL 75-36-700-3;Puccinia triticina 1-1 BBBD Race 1
1	A0A0C4EKX5	1034746009	OAV99992.1	100	220	3.48e-163	60S ribosomal protein L10	Puccinia triticina 1-1 BBBD Race 1	Puccinia triticina 1-1 BBBD Race 1
17	A0A0C4EKZ1	630349795	XP_007864198.1	60.988	405	3.25e-164	FMN-linked oxidoreductase	Gloeophyllum trabeum ATCC 11539	Gloeophyllum trabeum ATCC 11539
8	A0A0C4EL00	1216219593	SCV74694.1	48.413	252	3.47e-77	BQ2448_7723	Microbotryum intermedium	Microbotryum intermedium
1	A0A0C4ELC9	1034746247	OAW00231.1	100	353	0	malate dehydrogenase, NAD-dependent	Puccinia triticina 1-1 BBBD Race 1	Puccinia triticina 1-1 BBBD Race 1
2	A0A0C4ELH6	331237484	XP_003331399.1	94.07	371	0	ubiquitin thiolesterase	Puccinia graminis f. sp. tritici CRL 75-36-700-3	Puccinia graminis f. sp. tritici CRL 75-36-700-3
1	A0A0C4ELI9	1034739438	OAV93471.1	100	821	0	cell division cycle protein 48	Puccinia triticina 1-1 BBBD Race 1	Puccinia triticina 1-1 BBBD Race 1
2	A0A0C4ELL4	331226946	XP_003326142.1	87.215	790	0	phosphoribosylamine-glycine ligase	Puccinia graminis f. sp. tritici CRL 75-36-700-3	Puccinia graminis f. sp. tritici CRL 75-36-700-3
10	A0A0C4ELN5	1062135886	ODN82605.1	58.333	192	4.99e-68	ran-specific GTPase-activating protein 1	Cryptococcus depauperatus CBS 7841	Cryptococcus depauperatus CBS 7841
2	A0A0C4ELP7	331238071	XP_003331691.1	81.015	453	0	pyruvate dehydrogenase E1 component subunit alpha	Puccinia graminis f. sp. tritici CRL 75-36-700-3	Puccinia graminis f. sp. tritici CRL 75-36-700-3
1	A0A0C4ELQ9	331222719	XP_003324033.1	99.527	634	0	heat shock protein SSB	Puccinia graminis f. sp. tritici CRL 75-36-700-3	Puccinia graminis f. sp. tritici CRL 75-36-700-3
2	A0A0C4ELS5	403171610	XP_003330811.2	98.246	228	3.93e-165	20S proteasome subunit beta 6	Puccinia graminis f. sp. tritici CRL 75-36-700-3	Puccinia graminis f. sp. tritici CRL 75-36-700-3
1	A0A0C4ELS7	1034743494	OAV97489.1	100	117	3.09e-80	FK506-binding protein 1	Puccinia triticina 1-1 BBBD Race 1	Puccinia triticina 1-1 BBBD Race 1
2	A0A0C4ELW0	403171926	XP_003331107.2	91.951	733	0	translation initiation factor eIF-3 subunit 9	Puccinia graminis f. sp. tritici CRL 75-36-700-3	Puccinia graminis f. sp. tritici CRL 75-36-700-3
1	A0A0C4ELW2	1034733550	OAV87809.1	94.159	428	0	aspartate aminotransferase, mitochondrial	Puccinia triticina 1-1 BBBD Race 1	Puccinia triticina 1-1 BBBD Race 1
3	A0A0C4EM26	331233853	XP_003329587.1	100	149	4.51e-102	calmodulin	bread wheat;Puccinia coronata var. avenae f. sp. avenae;Puccinia graminis f. sp. tritici CRL 75-36-700-3;Puccinia striiformis f. sp. tritici PST-78	Triticum aestivum;Puccinia coronata var. avenae f. sp. avenae;Puccinia graminis f. sp. tritici CRL 75-36-700-3;Puccinia striiformis f. sp. tritici PST-78
1	A0A0C4EM44	1034744536	OAV98524.1	100	332	0	malate dehydrogenase, NAD-dependent	Puccinia triticina 1-1 BBBD Race 1	Puccinia triticina 1-1 BBBD Race 1
1	A0A0C4EM51	1034744526	OAV98514.1	100	542	0	ATP synthase subunit beta, mitochondrial	Puccinia triticina 1-1 BBBD Race 1	Puccinia triticina 1-1 BBBD Race 1
1	A0A0C4EM80	1034735150	OAV89267.1	100	151	1.72e-108	nucleoside diphosphate kinase	Puccinia triticina 1-1 BBBD Race 1	Puccinia triticina 1-1 BBBD Race 1
1	A0A0C4EMK9	1034736819	OAV90893.1	93.75	160	8.12e-104	60S ribosomal protein L21-A	Puccinia triticina 1-1 BBBD Race 1	Puccinia triticina 1-1 BBBD Race 1
1	A0A0C4EML0	1034736820	OAV90894.1	100	192	3.14e-134	40S ribosomal protein S9-B	Puccinia triticina 1-1 BBBD Race 1	Puccinia triticina 1-1 BBBD Race 1
8	A0A0C4EML3	955494741	XP_014657677.1	74.771	436	0	DUF89-domain-containing protein	Moesziomyces antarcticus	Moesziomyces antarcticus
14	A0A0C4EMV0	1358969399	PRQ70192.1	34.632	231	4.32e-26	protein phosphatase 2A inhibitor 2	Rhodotorula toruloides	Rhodotorula toruloides
1	A0A0C4EMW3	1034742074	OAV96078.1	100	216	8.49e-161	GTP-binding nuclear protein spi1	Puccinia triticina 1-1 BBBD Race 1	Puccinia triticina 1-1 BBBD Race 1
1	A0A0C4EMY9	1034742102	OAV96106.1	100	193	2.89e-140	40S ribosomal protein S5	Puccinia triticina 1-1 BBBD Race 1	Puccinia triticina 1-1 BBBD Race 1
1	A0A0C4EN28	1034736739	OAV90814.1	100	561	0	phosphoglucomutase	Puccinia triticina 1-1 BBBD Race 1	Puccinia triticina 1-1 BBBD Race 1
1	A0A0C4EN78	1034738341	OAV92388.1	100	437	0	phosphomannose isomerase type I	Puccinia triticina 1-1 BBBD Race 1	Puccinia triticina 1-1 BBBD Race 1
1	A0A0C4EN92	1034738327	OAV92374.1	100	293	0	20S proteasome subunit beta 2	Puccinia triticina 1-1 BBBD Race 1	Puccinia triticina 1-1 BBBD Race 1
1	A0A0C4END7	1034742046	OAV96050.1	100	1177	0	carbamoyl-phosphate synthase arginine-specific large chain	Puccinia triticina 1-1 BBBD Race 1	Puccinia triticina 1-1 BBBD Race 1
24	A0A0C4ENM5	599396565	XP_007411584.1	40.506	237	2.98e-39	secreted protein	Melampsora larici-populina 98AG31	Melampsora larici-populina 98AG31
16	A0A0C4ENQ1	1216227252	SCV67269.1	50.98	153	2.49e-34	BQ2448_5915	Microbotryum intermedium	Microbotryum intermedium
1	A0A0C4ENR2	1034745066	OAV99052.1	100	375	0	60S ribosomal protein L4-A	Puccinia triticina 1-1 BBBD Race 1	Puccinia triticina 1-1 BBBD Race 1
9	A0A0C4ENT2	1488147788	RKP13852.1	59.783	92	1.27e-30	ubiquitin-related domain-containing protein	Piptocephalis cylindrospora	Piptocephalis cylindrospora
2	A0A0C4EP22	31087950	AAP42830.1	98.744	398	0	alcohol dehydrogenase	Puccinia triticina	Puccinia triticina
1	A0A0C4EP78	1034737898	OAV91952.1	100	782	0	aconitate hydratase, mitochondrial	Puccinia triticina 1-1 BBBD Race 1	Puccinia triticina 1-1 BBBD Race 1
7	A0A0C4EPJ4	154794904	ABS86488.1	63.69	168	2.08e-54	nascent polypeptide-associated complex subunit alpha, partial	Melampsora medusae f. sp. deltoidis	Melampsora medusae f. sp. deltoidis
2	A0A0C4EPP1	403174367	XP_003333348.2	90.859	2374	0	carbamoyl-phosphate synthase small subunit	Puccinia graminis f. sp. tritici CRL 75-36-700-3	Puccinia graminis f. sp. tritici CRL 75-36-700-3
20	A0A0C4EPP6	599400632	XP_007412275.1	63.604	283	5.23e-126	family 18 glycoside hydrolase	Melampsora larici-populina 98AG31	Melampsora larici-populina 98AG31
0	A0A0C4EPU2	1034738935	OAV92973.1	99.537	216	3.25e-156	hypothetical protein PTTG_02795	Puccinia triticina 1-1 BBBD Race 1	Puccinia triticina 1-1 BBBD Race 1
5	A0A0C4EQ20	913870274	KNZ59644.1	85.843	332	0	deoxyhypusine hydroxylase	Puccinia sorghi	Puccinia sorghi
1	A0A0C4EQ66	1034742697	OAV96697.1	100	552	0	2-methylcitrate dehydratase	Puccinia triticina 1-1 BBBD Race 1	Puccinia triticina 1-1 BBBD Race 1
11	A0A0C4EQ92	1023229225	KZT26022.1	39.738	458	1.46e-100	fructosyl amino acid oxidase	Neolentinus lepideus HHB14362 ss-1	Neolentinus lepideus HHB14362 ss-1
11	A0A0C4EQD0	1340877798	POY75467.1	51.56	609	0	putative Leukotriene-A(4) hydrolase	Rhodotorula taiwanensis	Rhodotorula taiwanensis
2	A0A0C4EQV1	403164814	XP_003324887.2	88.525	183	8.74e-117	glutathione peroxidase	Puccinia graminis f. sp. tritici CRL 75-36-700-3	Puccinia graminis f. sp. tritici CRL 75-36-700-3
1	A0A0C4EQW4	1034743961	OAV97953.1	97.065	511	0	eukaryotic translation initiation factor 2 subunit gamma	Puccinia triticina 1-1 BBBD Race 1	Puccinia triticina 1-1 BBBD Race 1
2	A0A0C4EQX0	331224400	XP_003324872.1	96.04	303	0	5'-methylthioadenosine phosphorylase	Puccinia graminis f. sp. tritici CRL 75-36-700-3	Puccinia graminis f. sp. tritici CRL 75-36-700-3
1	A0A0C4ERD6	1034735660	OAV89760.1	100	270	0	large subunit ribosomal protein L7Ae	Puccinia triticina 1-1 BBBD Race 1	Puccinia triticina 1-1 BBBD Race 1
7	A0A0C4ERE8	595778144	XP_007267615.1	48.718	195	2.49e-44	RNA-binding domain-containing protein	Fomitiporia mediterranea MF3/22	Fomitiporia mediterranea MF3/22
1	A0A0C4ERK3	1034742180	OAV96183.1	100	626	0	6-phosphogluconate dehydrogenase	Puccinia triticina 1-1 BBBD Race 1	Puccinia triticina 1-1 BBBD Race 1
1	A0A0C4ERN7	1034742245	OAV96248.1	100	439	0	carbamoyl-phosphate synthase, small subunit	Puccinia triticina 1-1 BBBD Race 1	Puccinia triticina 1-1 BBBD Race 1
1	A0A0C4ERQ8	1034742273	OAV96276.1	100	653	0	heat shock protein HSS1	Puccinia triticina 1-1 BBBD Race 1	Puccinia triticina 1-1 BBBD Race 1
1	A0A0C4ERS1	1034738481	OAV92526.1	99.512	205	2.4e-144	NAD(P)H:quinone oxidoreductase, type IV	Puccinia triticina 1-1 BBBD Race 1	Puccinia triticina 1-1 BBBD Race 1
2	A0A0C4ERS9	331212225	XP_003307382.1	91.518	224	7.07e-136	elongation factor EF-1 beta subunit	Puccinia graminis f. sp. tritici CRL 75-36-700-3	Puccinia graminis f. sp. tritici CRL 75-36-700-3
1	A0A0C4ERU7	331215087	XP_003320224.1	97.264	329	0	fructose-bisphosphate aldolase, class II	Puccinia graminis f. sp. tritici CRL 75-36-700-3	Puccinia graminis f. sp. tritici CRL 75-36-700-3
1	A0A0C4ERV1	1034742835	OAV96834.1	100	257	0	40S ribosomal protein S1	Puccinia triticina 1-1 BBBD Race 1	Puccinia triticina 1-1 BBBD Race 1
8	A0A0C4ERV4	1022854142	XP_016271904.1	64.179	201	7.1e-77	Rho GDP-dissociation inhibitor	Rhodotorula toruloides;Rhodotorula toruloides NP11	Rhodotorula toruloides;Rhodotorula toruloides NP11
1	A0A0C4ERW8	1034742814	OAV96813.1	100	262	0	proteasome subunit alpha type-5	Puccinia triticina 1-1 BBBD Race 1	Puccinia triticina 1-1 BBBD Race 1
19	A0A0C4ERX5	1216222388	SCV72162.1	44.507	355	5.53e-74	BQ2448_4856	Microbotryum intermedium	Microbotryum intermedium
17	A0A0C4ERX9	599428038	XP_007418383.1	45.804	286	1.16e-76	family 4 carbohydrate esterase	Melampsora larici-populina 98AG31	Melampsora larici-populina 98AG31
11	A0A0C4ES78	983149650	KWU47603.1	59.384	357	1.03e-142	Ribokinase-like protein	Rhodotorula sp. JG-1b	Rhodotorula sp. JG-1b
1	A0A0C4ES93	1034739542	OAV93573.1	99.747	396	0	UV excision repair protein Rad23	Puccinia triticina 1-1 BBBD Race 1	Puccinia triticina 1-1 BBBD Race 1
2	A0A0C4ESM9	331226000	XP_003325670.1	89.176	425	0	protein phosphatase	Puccinia graminis f. sp. tritici CRL 75-36-700-3	Puccinia graminis f. sp. tritici CRL 75-36-700-3
12	A0A0C4ESR3	403173614	XP_003332669.2	96.368	1542	0	acetyl-CoA carboxylase/biotin carboxylase	Puccinia graminis f. sp. tritici CRL 75-36-700-3	Puccinia graminis f. sp. tritici CRL 75-36-700-3
16	A0A0C4EST8	599352838	XP_007403579.1	62.02	495	0	family 5 glycoside hydrolase	Melampsora larici-populina 98AG31	Melampsora larici-populina 98AG31
0	A0A0C4ET28	1034736361	OAV90444.1	80.192	313	4.2e-147	hypothetical protein PTTG_28324	Puccinia triticina 1-1 BBBD Race 1	Puccinia triticina 1-1 BBBD Race 1
1	A0A0C4ETH1	1034735440	OAV89547.1	93.06	562	0	T-complex protein 1 subunit eta	Puccinia triticina 1-1 BBBD Race 1	Puccinia triticina 1-1 BBBD Race 1
39	A0A0C4ETI7	1173940176	OQR89677.1	41.872	203	1.71e-45	glutathione S-transferase	Achlya hypogyna	Achlya hypogyna
19	A0A0C4ETM9	1012303527	AMS24303.1	32.787	122	2.57e-13	CSEP-32, partial	Phakopsora pachyrhizi	Phakopsora pachyrhizi
1	A0A0C4EUC9	1034739888	OAV93915.1	100	324	0	hydroxyacylglutathione hydrolase	Puccinia triticina 1-1 BBBD Race 1	Puccinia triticina 1-1 BBBD Race 1
1	A0A0C4EUE7	1034741158	OAV95172.1	100	151	6.83e-106	40S ribosomal protein S13	Puccinia triticina 1-1 BBBD Race 1	Puccinia triticina 1-1 BBBD Race 1
8	A0A0C4EUH4	599105869	XP_007382709.1	52.907	172	9.36e-49	RNA-binding domain-containing protein	Punctularia strigosozonata HHB-11173 SS5	Punctularia strigosozonata HHB-11173 SS5
1	A0A0C4EUQ7	331231000	XP_003328164.1	100	129	5.23e-90	40S ribosomal protein S22	Puccinia striiformis;Puccinia coronata var. avenae f. sp. avenae;Puccinia graminis f. sp. tritici CRL 75-36-700-3;Puccinia triticina 1-1 BBBD Race 1	Puccinia striiformis;Puccinia coronata var. avenae f. sp. avenae;Puccinia graminis f. sp. tritici CRL 75-36-700-3;Puccinia triticina 1-1 BBBD Race 1
2	A0A0C4EUT5	331241671	XP_003333483.1	85.366	492	0	UDP-N-acetylglucosamine pyrophosphorylase	Puccinia graminis f. sp. tritici CRL 75-36-700-3	Puccinia graminis f. sp. tritici CRL 75-36-700-3
2	A0A0C4EUZ1	331215859	XP_003320609.1	86.502	526	0	3-oxoacid CoA-transferase subunit B	Puccinia graminis f. sp. tritici CRL 75-36-700-3	Puccinia graminis f. sp. tritici CRL 75-36-700-3
1	A0A0C4EWC1	1034737379	OAV91441.1	100	211	4.17e-153	40S ribosomal protein S8	Puccinia triticina 1-1 BBBD Race 1	Puccinia triticina 1-1 BBBD Race 1
1	A0A0C4EWG3	1034740609	OAV94629.1	100	138	6.88e-99	40S ribosomal protein S11	Puccinia triticina 1-1 BBBD Race 1	Puccinia triticina 1-1 BBBD Race 1
1	A0A0C4EWK6	1034741045	OAV95060.1	100	340	0	protein NMT1	Puccinia triticina 1-1 BBBD Race 1	Puccinia triticina 1-1 BBBD Race 1
39	A0A0C4EWV4	983143577	KWU41598.1	66.929	127	2.3e-46	ARM repeat-containing protein, partial	Rhodotorula sp. JG-1b	Rhodotorula sp. JG-1b
38	A0A0C4EX90	599386114	XP_007409614.1	37.405	917	0	subtilisin protease	Melampsora larici-populina 98AG31	Melampsora larici-populina 98AG31
1	A0A0C4EXA5	1034741391	OAV95402.1	100	361	0	glutamine synthetase	Puccinia triticina 1-1 BBBD Race 1	Puccinia triticina 1-1 BBBD Race 1
1	A0A0C4EXB9	1034732346	OAV86989.1	100	441	0	GTP-binding protein YchF	Puccinia triticina 1-1 BBBD Race 1	Puccinia triticina 1-1 BBBD Race 1
0	A0A0C4EXJ5	1034744435	OAV98424.1	100	276	0	hypothetical protein PTTG_05544	Puccinia triticina 1-1 BBBD Race 1	Puccinia triticina 1-1 BBBD Race 1
1	A0A0C4EXT6	1034735799	OAV89896.1	95.854	410	0	chorismate synthase	Puccinia triticina 1-1 BBBD Race 1	Puccinia triticina 1-1 BBBD Race 1
1	A0A0C4EXV9	1034733849	OAV88051.1	100	379	0	3-isopropylmalate dehydrogenase	Puccinia triticina 1-1 BBBD Race 1	Puccinia triticina 1-1 BBBD Race 1
1	A0A0C4EYC0	1034736604	OAV90682.1	100	192	1.67e-137	large subunit ribosomal protein L9e	Puccinia triticina 1-1 BBBD Race 1	Puccinia triticina 1-1 BBBD Race 1
2	A0A0C4EYC6	331243120	XP_003334204.1	99.029	103	1.06e-66	chaperonin GroS	Puccinia graminis f. sp. tritici CRL 75-36-700-3	Puccinia graminis f. sp. tritici CRL 75-36-700-3
18	A0A0C4EYL0	597971353	XP_007360923.1	55.435	184	1.44e-65	Osmotin thaumatin-like protein	Dichomitus squalens LYAD-421 SS1	Dichomitus squalens LYAD-421 SS1
20	A0A0C4EYL1	1418865284	XP_025354855.1	42.069	145	5.46e-27	secreted protein	Meira miltonrushii	Meira miltonrushii
2	A0A0C4EYL5	403171639	XP_003330839.2	91.304	138	3.68e-88	cofilin	Puccinia graminis f. sp. tritici CRL 75-36-700-3	Puccinia graminis f. sp. tritici CRL 75-36-700-3
0	A0A0C4EYQ4	1034746135	OAW00119.1	100	431	0	hypothetical protein PTTG_05956	Puccinia triticina 1-1 BBBD Race 1	Puccinia triticina 1-1 BBBD Race 1
3	A0A0C4EZ44	331228013	XP_003326674.1	74	100	4.42e-48	glutaredoxin 3	Puccinia graminis f. sp. tritici CRL 75-36-700-3	Puccinia graminis f. sp. tritici CRL 75-36-700-3
1	A0A0C4EZ56	1034735308	OAV89419.1	100	1056	0	elongation factor EF-3	Puccinia triticina 1-1 BBBD Race 1	Puccinia triticina 1-1 BBBD Race 1
8	A0A0C4EZA5	599387814	XP_007409974.1	69.628	349	4.52e-168	family 17 glycoside hydrolase	Melampsora larici-populina 98AG31	Melampsora larici-populina 98AG31
1	A0A0C4EZA7	1034735773	OAV89871.1	100	536	0	hydroxymethylglutaryl-CoA synthase	Puccinia triticina 1-1 BBBD Race 1	Puccinia triticina 1-1 BBBD Race 1
1	A0A0C4EZG4	1034732678	OAV87196.1	100	163	1.11e-115	glycine cleavage system H protein	Puccinia triticina 1-1 BBBD Race 1	Puccinia triticina 1-1 BBBD Race 1
11	A0A0C4EZI4	1139917464	GAV99593.1	60.811	148	1.31e-59	DUF757-domain-containing protein	shiitake mushroom	Lentinula edodes
8	A0A0C4EZL4	761924023	KIY45376.1	71.667	360	5e-176	polyadenylate-binding protein	Fistulina hepatica ATCC 64428	Fistulina hepatica ATCC 64428
66	A0A0C4EZR4	1405427389	SCZ91925.1	32.377	244	1.62e-26	BZ3501_MvSof-1269-A2-R1_Chr2-1g04182	Microbotryum saponariae	Microbotryum saponariae
1	A0A0C4EZX0	1034741527	OAV95537.1	100	770	0	5-methyltetrahydropteroyltriglutamate-homocysteine methyltransferase	Puccinia triticina 1-1 BBBD Race 1	Puccinia triticina 1-1 BBBD Race 1
21	A0A0C4F018	1022852384	XP_016272337.1	48.936	235	6.01e-75	macrofage activating glycoprotein	Rhodotorula toruloides;Rhodotorula toruloides NP11	Rhodotorula toruloides;Rhodotorula toruloides NP11
1	A0A0C4F058	31087954	AAP42832.1	99.048	420	0	chitinase	Puccinia triticina	Puccinia triticina
3	A0A0C4F080	403169133	XP_003328654.2	92.416	356	0	translation initiation factor eIF-3 subunit 7	Puccinia graminis f. sp. tritici CRL 75-36-700-3	Puccinia graminis f. sp. tritici CRL 75-36-700-3
1	A0A0C4F0D9	1034736621	OAV90699.1	100	265	0	14-3-3-like protein	Puccinia triticina 1-1 BBBD Race 1	Puccinia triticina 1-1 BBBD Race 1
3	A0A0C4F0Y7	331241623	XP_003333459.1	92.703	370	0	3-deoxy-7-phosphoheptulonate synthase	Puccinia graminis f. sp. tritici CRL 75-36-700-3	Puccinia graminis f. sp. tritici CRL 75-36-700-3
1	A0A0C4F107	1034739692	OAV93721.1	100	355	0	thioredoxin reductase (NADPH)	Puccinia triticina 1-1 BBBD Race 1	Puccinia triticina 1-1 BBBD Race 1
2	A0A0C4F117	331222999	XP_003324173.1	92.664	777	0	heat shock 70kDa protein 4	Puccinia graminis f. sp. tritici CRL 75-36-700-3	Puccinia graminis f. sp. tritici CRL 75-36-700-3
1	A0A0C4F163	1034733967	OAV88154.1	100	87	2.43e-57	40S ribosomal protein S21	Puccinia triticina 1-1 BBBD Race 1	Puccinia triticina 1-1 BBBD Race 1
1	A0A0C4F197	1034733893	OAV88091.1	100	704	0	heat shock protein 90-1	Puccinia triticina 1-1 BBBD Race 1	Puccinia triticina 1-1 BBBD Race 1
1	A0A0C4F1A2	1034740669	OAV94688.1	100	980	0	alanyl-tRNA synthetase	Puccinia triticina 1-1 BBBD Race 1	Puccinia triticina 1-1 BBBD Race 1
10	A0A0C4F1H2	1240232766	PAV16225.1	50.502	299	8.12e-95	periplasmic binding -like II	Pyrrhoderma noxium	Pyrrhoderma noxium
1	A0A0C4F1S9	331244023	XP_003334653.1	89.862	217	1.36e-134	histone chaperone ASF1	Puccinia graminis f. sp. tritici CRL 75-36-700-3	Puccinia graminis f. sp. tritici CRL 75-36-700-3
2	A0A0C4F1V6	331214129	XP_003319746.1	95.327	107	6.69e-68	60S ribosomal protein L22	Puccinia graminis f. sp. tritici CRL 75-36-700-3	Puccinia graminis f. sp. tritici CRL 75-36-700-3
3	A0A0C4F208	913847619	KNZ48236.1	94.904	157	4.73e-99	small subunit ribosomal protein S10e	Puccinia sorghi	Puccinia sorghi
1	A0A0C4F219	1034737174	OAV91240.1	100	286	0	glucose 1-dehydrogenase	Puccinia triticina 1-1 BBBD Race 1	Puccinia triticina 1-1 BBBD Race 1
11	A0A0C4F2A8	1358971994	PRQ72779.1	60.484	124	6.51e-44	Ribosome maturation protein SBDS	Rhodotorula toruloides	Rhodotorula toruloides
1	A0A0C4F2N4	1034736218	OAV90304.1	100	340	0	succinyl-CoA ligase subunit alpha	Puccinia triticina 1-1 BBBD Race 1	Puccinia triticina 1-1 BBBD Race 1
22	A0A0C4F2S7	599384037	XP_007409268.1	68.824	170	9.87e-82	thaumatin-like protein	Melampsora larici-populina 98AG31	Melampsora larici-populina 98AG31
1	A0A0C4F303	1034735077	OAV89196.1	100	401	0	pyruvate dehydrogenase E1 component subunit beta	Puccinia triticina 1-1 BBBD Race 1	Puccinia triticina 1-1 BBBD Race 1
2	A0A0C4F387	403177342	XP_003335888.2	90.552	815	0	glutamyl-tRNA synthetase	Puccinia graminis f. sp. tritici CRL 75-36-700-3	Puccinia graminis f. sp. tritici CRL 75-36-700-3
10	A0A0C4F3B5	1216221850	SCV72782.1	38.579	197	1.82e-30	BQ2448_4319	Microbotryum intermedium	Microbotryum intermedium
1	A0A0C4F3J9	1034742727	OAV96726.1	100	485	0	adenylosuccinate lyase	Puccinia triticina 1-1 BBBD Race 1	Puccinia triticina 1-1 BBBD Race 1
2	A0A0C4F3S8	331240883	XP_003333091.1	73.599	553	0	bleomycin hydrolase	Puccinia graminis f. sp. tritici CRL 75-36-700-3	Puccinia graminis f. sp. tritici CRL 75-36-700-3
1	A0A0C4F4L5	1034732886	OAV87331.1	100	553	0	GMP synthase	Puccinia triticina 1-1 BBBD Race 1	Puccinia triticina 1-1 BBBD Race 1
1	A0A0C4F4L6	1034746178	OAW00162.1	100	297	0	large subunit ribosomal protein L5e	Puccinia triticina 1-1 BBBD Race 1	Puccinia triticina 1-1 BBBD Race 1
2	A0A0C4F4Y8	331228121	XP_003326728.1	99.441	179	7.14e-126	nascent polypeptide-associated complex subunit beta	Puccinia graminis f. sp. tritici CRL 75-36-700-3	Puccinia graminis f. sp. tritici CRL 75-36-700-3
2	A0A0C4F552	403164006	XP_003324090.2	95.636	527	0	aldehyde dehydrogenase (NAD+)	Puccinia graminis f. sp. tritici CRL 75-36-700-3	Puccinia graminis f. sp. tritici CRL 75-36-700-3
1	A0A0C4F596	1034741798	OAV95805.1	99.701	334	0	glyceraldehyde-3-phosphate dehydrogenase	Puccinia triticina 1-1 BBBD Race 1	Puccinia triticina 1-1 BBBD Race 1
1	A0A0C4F5D7	1034739966	OAV93992.1	91.479	1244	0	coatomer protein complex, subunit alpha (xenin)	Puccinia triticina 1-1 BBBD Race 1	Puccinia triticina 1-1 BBBD Race 1
4	A0A0C4F5H5	403165403	XP_003890053.1	96.324	136	3.55e-89	dUTP pyrophosphatase	Puccinia graminis f. sp. tritici CRL 75-36-700-3	Puccinia graminis f. sp. tritici CRL 75-36-700-3
15	A0A0C4F5Q3	31087954	AAP42832.1	59.791	383	4.58e-173	chitinase	Puccinia triticina	Puccinia triticina
2	A0A0C4F5U7	331229858	XP_003327594.1	79.452	438	0	peptidylprolyl isomerase	Puccinia graminis f. sp. tritici CRL 75-36-700-3	Puccinia graminis f. sp. tritici CRL 75-36-700-3
12	A0A0C4F619	1021816616	KZP05649.1	61.111	306	9.39e-126	acid protease	Fibularhizoctonia sp. CBS 109695	Fibularhizoctonia sp. CBS 109695
1	A0A0C4F644	1034739914	OAV93941.1	100	255	0	guanylate kinase	Puccinia triticina 1-1 BBBD Race 1	Puccinia triticina 1-1 BBBD Race 1
2	A0A0C4F6G6	403170182	XP_003889576.1	94.535	1043	0	26S proteasome regulatory subunit N1	Puccinia graminis f. sp. tritici CRL 75-36-700-3	Puccinia graminis f. sp. tritici CRL 75-36-700-3
0	A0A0C4F6M4	1034738035	OAV92087.1	100	134	2.04e-95	hypothetical protein PTTG_08794	Puccinia triticina 1-1 BBBD Race 1	Puccinia triticina 1-1 BBBD Race 1
2	A0A0C4F7L0	331221599	XP_003323474.1	87.054	533	0	phosphoacetylglucosamine mutase	Puccinia graminis f. sp. tritici CRL 75-36-700-3	Puccinia graminis f. sp. tritici CRL 75-36-700-3
1	A0A0C4F7P6	1034733639	OAV87879.1	93.26	549	0	T-complex protein 1, theta subunit	Puccinia triticina 1-1 BBBD Race 1	Puccinia triticina 1-1 BBBD Race 1
8	A0A0C4F7R5	1183468878	ORY92805.1	56.303	238	6.69e-91	HAD-like domain-containing protein	Leucosporidium creatinivorum	Leucosporidium creatinivorum
9	A0A0C4F7Z5	647398397	CDR42256.1	63.128	358	4.81e-144	RHTO0S06e11760g1_1	Rhodotorula toruloides	Rhodotorula toruloides
1	A0A0C4F869	1034735074	OAV89193.1	100	166	1.28e-119	translationally-controlled tumor protein	Puccinia triticina 1-1 BBBD Race 1	Puccinia triticina 1-1 BBBD Race 1
1	A0A0C4F881	1034734777	OAV88907.1	100	330	0	pyridoxine biosynthesis protein PDX1	Puccinia triticina 1-1 BBBD Race 1	Puccinia triticina 1-1 BBBD Race 1
2	A0A0C4F8C0	331245381	XP_003335327.1	98.504	468	0	citrate synthase	Puccinia graminis f. sp. tritici CRL 75-36-700-3	Puccinia graminis f. sp. tritici CRL 75-36-700-3
11	A0A0C4F8L8	1405420462	SDA06229.1	56.174	413	4.73e-142	BZ3501_MvSof-1269-A2-R1_Chr10-1g02341	Microbotryum saponariae	Microbotryum saponariae
2	A0A0C4F8T8	331220978	XP_003323164.1	94.393	107	2.24e-65	high mobility group protein B1	Puccinia graminis f. sp. tritici CRL 75-36-700-3	Puccinia graminis f. sp. tritici CRL 75-36-700-3
11	A0A0C4F9B4	1023278350	KZT73199.1	71.674	639	0	Thiamin diphosphate-binding protein	Daedalea quercina L-15889	Daedalea quercina L-15889
130	A0A0C4F9C2	1216224047	SCV69985.1	37.845	362	1.94e-64	BQ2448_1379	Microbotryum intermedium	Microbotryum intermedium
4	A0A0C4F9E4	331217081	XP_003321219.1	98.4	250	6.1e-178	60S ribosomal protein L7	Puccinia graminis f. sp. tritici CRL 75-36-700-3	Puccinia graminis f. sp. tritici CRL 75-36-700-3
23	A0A0C4FAG0	1024101573	KZV92847.1	39.041	146	5.53e-14	Cupredoxin	Exidia glandulosa HHB12029	Exidia glandulosa HHB12029
1	A0A0C4FAR5	1034737088	OAV91155.1	100	344	0	geranyltranstransferase	Puccinia triticina 1-1 BBBD Race 1	Puccinia triticina 1-1 BBBD Race 1
1	A0A0C4FBG5	1034744206	OAV98196.1	92.898	352	0	UDP-glucose 4-epimerase	Puccinia triticina 1-1 BBBD Race 1	Puccinia triticina 1-1 BBBD Race 1
0	A0A0C4FBU2	1034733621	OAV87865.1	100	134	1.97e-95	hypothetical protein PTTG_10691	Puccinia triticina 1-1 BBBD Race 1	Puccinia triticina 1-1 BBBD Race 1
0	A0A180FX95	1034722800	OAV85011.1	100	127	2.59e-88	hypothetical protein PTTG_12725	Puccinia triticina 1-1 BBBD Race 1	Puccinia triticina 1-1 BBBD Race 1
1	A0A180G194	1034731266	OAV86417.1	100	299	0	20S proteasome subunit beta 5	Puccinia triticina 1-1 BBBD Race 1	Puccinia triticina 1-1 BBBD Race 1
1	A0A180G1J2	1034731412	OAV86484.1	100	350	0	transaldolase, partial	Puccinia triticina 1-1 BBBD Race 1	Puccinia triticina 1-1 BBBD Race 1
1	A0A180G1R1	1034731526	OAV86540.1	100	432	0	adenosylhomocysteinase	Puccinia triticina 1-1 BBBD Race 1	Puccinia triticina 1-1 BBBD Race 1
1	A0A180G1W2	1034731584	OAV86568.1	100	511	0	dihydrolipoyl dehydrogenase	Puccinia triticina 1-1 BBBD Race 1	Puccinia triticina 1-1 BBBD Race 1
1	A0A180G2E4	1034731637	OAV86592.1	100	553	0	aspartyl-tRNA synthetase	Puccinia triticina 1-1 BBBD Race 1	Puccinia triticina 1-1 BBBD Race 1
2	A0A180G2J0	403168995	XP_003328555.2	89.412	425	0	aminotransferase	Puccinia graminis f. sp. tritici CRL 75-36-700-3	Puccinia graminis f. sp. tritici CRL 75-36-700-3
1	A0A180G2M2	1034732185	OAV86897.1	100	1092	0	leucyl-tRNA synthetase	Puccinia triticina 1-1 BBBD Race 1	Puccinia triticina 1-1 BBBD Race 1
2	A0A180G2U7	403159882	XP_003320436.2	98.117	1115	0	ubiquitin thiolesterase	Puccinia graminis f. sp. tritici CRL 75-36-700-3	Puccinia graminis f. sp. tritici CRL 75-36-700-3
1	A0A180G327	1034732100	OAV86849.1	100	255	0	triosephosphate isomerase	Puccinia triticina 1-1 BBBD Race 1	Puccinia triticina 1-1 BBBD Race 1
0	A0A180G334	1034732539	OAV87106.1	100	471	0	hypothetical protein PTTG_07204	Puccinia triticina 1-1 BBBD Race 1	Puccinia triticina 1-1 BBBD Race 1
1	A0A180G360	1034732410	OAV87028.1	100	173	6.6e-123	60S ribosomal protein L11	Puccinia coronata var. avenae f. sp. avenae;Puccinia triticina 1-1 BBBD Race 1	Puccinia coronata var. avenae f. sp. avenae;Puccinia triticina 1-1 BBBD Race 1
24	A0A180G3A0	554906803	ESK88676.1	47.602	563	1.49e-153	coatomer subunit delta	Moniliophthora roreri MCA 2997	Moniliophthora roreri MCA 2997
6	A0A180G405	909605893	KNE96271.1	78.287	502	0	dihydrolipoyllysine-residue succinyltransferase, E2 component	Puccinia striiformis f. sp. tritici PST-78	Puccinia striiformis f. sp. tritici PST-78
2	A0A180G431	403173368	XP_003332445.2	98.316	297	0	translation initiation factor eIF-2 alpha subunit	Puccinia graminis f. sp. tritici CRL 75-36-700-3	Puccinia graminis f. sp. tritici CRL 75-36-700-3
0	A0A180G4N7	1034733236	OAV87568.1	100	135	2.03e-96	hypothetical protein PTTG_12514	Puccinia triticina 1-1 BBBD Race 1	Puccinia triticina 1-1 BBBD Race 1
9	A0A180G6E0	1022844790	XP_016274812.1	50	968	0	transcription factor (Snd1/p100)	Rhodotorula toruloides;Rhodotorula toruloides NP11	Rhodotorula toruloides;Rhodotorula toruloides NP11
2	A0A180G6E5	331226164	XP_003325752.1	94.73	759	0	spermidine synthase	Puccinia graminis f. sp. tritici CRL 75-36-700-3	Puccinia graminis f. sp. tritici CRL 75-36-700-3
15	A0A180G6H2	1023247311	KZT43068.1	50.602	249	3.29e-79	alpha/beta-hydrolase	Sistotremastrum suecicum HHB10207 ss-3	Sistotremastrum suecicum HHB10207 ss-3
1	A0A180G747	1034734282	OAV88440.1	100	124	3.89e-86	nuclear transport factor 2	Puccinia triticina 1-1 BBBD Race 1	Puccinia triticina 1-1 BBBD Race 1
59	A0A180G7A5	751693072	KIM43056.1	30.496	282	2.12e-24	glycoside hydrolase family 131 protein, partial	Hebeloma cylindrosporum h7	Hebeloma cylindrosporum h7
12	A0A180G7D3	1247167410	PCH41095.1	48.583	247	3.91e-77	pyrimidine 5-nucleotidase	Wolfiporia cocos MD-104 SS10	Wolfiporia cocos MD-104 SS10
48	A0A180G7E7	1240235410	PAV18866.1	28.283	297	6.65e-08	conserved fungal	Pyrrhoderma noxium	Pyrrhoderma noxium
2	A0A180G7H5	331212333	XP_003307436.1	94.068	354	0	urease accessory protein	Puccinia graminis f. sp. tritici CRL 75-36-700-3	Puccinia graminis f. sp. tritici CRL 75-36-700-3
2	A0A180G7X6	909610346	KNF00604.1	96.959	296	0	40S ribosomal protein S0	Puccinia striiformis f. sp. tritici PST-78	Puccinia striiformis f. sp. tritici PST-78
2	A0A180G7Z4	403178659	XP_003337064.2	93.382	272	0	20S proteasome subunit beta 7	Puccinia graminis f. sp. tritici CRL 75-36-700-3	Puccinia graminis f. sp. tritici CRL 75-36-700-3
1	A0A180G806	1034734462	OAV88609.1	100	475	0	homocitrate synthase, mitochondrial	Puccinia triticina 1-1 BBBD Race 1	Puccinia triticina 1-1 BBBD Race 1
0	A0A180G881	1034734775	OAV88905.1	100	121	5.79e-75	hypothetical protein PTTG_08247	Puccinia triticina 1-1 BBBD Race 1	Puccinia triticina 1-1 BBBD Race 1
67	A0A180G8A5	927749501	KPA35278.1	47.264	201	7.33e-50	cell wall mannoprotein	Fusarium langsethiae	Fusarium langsethiae
2	A0A180G8T3	403169093	XP_003889657.1	96.691	2750	0	fatty acid synthase subunit beta	Puccinia graminis f. sp. tritici CRL 75-36-700-3	Puccinia graminis f. sp. tritici CRL 75-36-700-3
2	A0A180G8W4	403158016	XP_003307367.2	96.028	428	0	histone-binding protein RBBP4	Puccinia graminis f. sp. tritici CRL 75-36-700-3	Puccinia graminis f. sp. tritici CRL 75-36-700-3
1	A0A180G972	1034735139	OAV89256.1	100	756	0	3-isopropylmalate dehydratase	Puccinia triticina 1-1 BBBD Race 1	Puccinia triticina 1-1 BBBD Race 1
27	A0A180G994	599354806	XP_007403937.1	40.238	589	7.76e-143	family 27 glycoside hydrolase	Melampsora larici-populina 98AG31	Melampsora larici-populina 98AG31
8	A0A180G9N6	1405418863	SDA07873.1	59.655	290	1.65e-122	BZ3501_MvSof-1269-A2-R1_Chr6-1g08310	Microbotryum saponariae	Microbotryum saponariae
2	A0A180GA04	331226650	XP_003325994.1	95.344	494	0	fumarate hydratase, mitochondrial	Puccinia graminis f. sp. tritici CRL 75-36-700-3	Puccinia graminis f. sp. tritici CRL 75-36-700-3
1	A0A180GA92	1034735125	OAV89242.1	100	400	0	ketol-acid reductoisomerase, mitochondrial	Puccinia triticina 1-1 BBBD Race 1	Puccinia triticina 1-1 BBBD Race 1
1	A0A180GA96	1034735521	OAV89625.1	100	460	0	elongation factor 1-alpha	Puccinia triticina 1-1 BBBD Race 1	Puccinia triticina 1-1 BBBD Race 1
10	A0A180GAB6	599424028	XP_007417205.1	65.41	1061	0	zinc metalloprotease	Melampsora larici-populina 98AG31	Melampsora larici-populina 98AG31
10	A0A180GAE6	1022841730	XP_016276148.1	45.276	254	1.47e-65	GDSL Lipase/Acylhydrolase family protein	Rhodotorula toruloides;Rhodotorula toruloides NP11	Rhodotorula toruloides;Rhodotorula toruloides NP11
1	A0A180GAV6	1034735722	OAV89821.1	100	433	0	ATP-dependent RNA helicase uap56	Puccinia triticina 1-1 BBBD Race 1	Puccinia triticina 1-1 BBBD Race 1
10	A0A180GB75	1024111483	KZW02645.1	72.775	191	1.66e-97	putative nudC protein	Exidia glandulosa HHB12029	Exidia glandulosa HHB12029
1	A0A180GBB6	1034735657	OAV89757.1	100	556	0	glucose-6-phosphate isomerase	Puccinia triticina 1-1 BBBD Race 1	Puccinia triticina 1-1 BBBD Race 1
1	A0A180GBK4	1034735975	OAV90067.1	100	381	0	uroporphyrinogen decarboxylase	Puccinia triticina 1-1 BBBD Race 1	Puccinia triticina 1-1 BBBD Race 1
4	A0A180GBL8	343791206	AEM61140.1	76.384	885	0	argonaute-like protein	Puccinia striiformis f. sp. tritici;Puccinia striiformis f. sp. tritici PST-78	Puccinia striiformis f. sp. tritici;Puccinia striiformis f. sp. tritici PST-78
9	A0A180GBV1	1418867150	XP_025355832.1	78.417	139	2.21e-75	putative myosin regulatory light chain cdc4, partial	Meira miltonrushii	Meira miltonrushii
1	A0A180GC17	1034736082	OAV90171.1	100	532	0	pyruvate kinase	Puccinia triticina 1-1 BBBD Race 1	Puccinia triticina 1-1 BBBD Race 1
10	A0A180GC26	1183440598	ORY64774.1	56.132	212	3.38e-73	SGS domain-domain-containing protein	Leucosporidium creatinivorum	Leucosporidium creatinivorum
1	A0A180GC38	1034736008	OAV90099.1	100	311	0	large subunit ribosomal protein LP0	Puccinia triticina 1-1 BBBD Race 1	Puccinia triticina 1-1 BBBD Race 1
0	A0A180GC84	1034736183	OAV90270.1	100	139	2.16e-94	hypothetical protein PTTG_12601	Puccinia triticina 1-1 BBBD Race 1	Puccinia triticina 1-1 BBBD Race 1
6	A0A180GCB3	913860378	KNZ53797.1	90.842	546	0	lysine--tRNA ligase	Puccinia sorghi	Puccinia sorghi
1	A0A180GCE1	1034736038	OAV90128.1	100	432	0	argininosuccinate synthase	Puccinia triticina 1-1 BBBD Race 1	Puccinia triticina 1-1 BBBD Race 1
9	A0A180GCI8	554904670	ESK86866.1	53.067	375	1.66e-103	translation initiation factor	Moniliophthora roreri;Moniliophthora roreri MCA 2997	Moniliophthora roreri;Moniliophthora roreri MCA 2997
0	A0A180GCL8	1034735560	OAV89663.1	100	133	1.3e-95	hypothetical protein PTTG_12430	Puccinia triticina 1-1 BBBD Race 1	Puccinia triticina 1-1 BBBD Race 1
18	A0A180GCN9	532166775	AGT80113.1	43.478	276	2.23e-66	endoglucanase 4	Hemileia vastatrix	Hemileia vastatrix
1	A0A180GCW1	1034736456	OAV90537.1	100	253	0	20S proteasome subunit alpha 6	Puccinia triticina 1-1 BBBD Race 1	Puccinia triticina 1-1 BBBD Race 1
1	A0A180GD88	1034736599	OAV90677.1	100	586	0	heat shock protein 60	Puccinia triticina 1-1 BBBD Race 1	Puccinia triticina 1-1 BBBD Race 1
41	A0A180GDI5	1173940176	OQR89677.1	36.765	204	5.53e-39	glutathione S-transferase	Achlya hypogyna	Achlya hypogyna
10	A0A180GDN1	983146135	KWU44106.1	52.688	372	1.96e-135	Creatinase/aminopeptidase, partial	Rhodotorula sp. JG-1b	Rhodotorula sp. JG-1b
14	A0A180GDP3	599389403	XP_007410265.1	63.077	780	0	prolyl endopeptidase	Melampsora larici-populina 98AG31	Melampsora larici-populina 98AG31
1	A0A180GDR6	1034736390	OAV90472.1	100	343	0	protein arginine N-methyltransferase 1	Puccinia triticina 1-1 BBBD Race 1	Puccinia triticina 1-1 BBBD Race 1
5	A0A180GDU6	913873663	KNZ60773.1	78.431	102	5.52e-51	thioredoxin	Puccinia sorghi	Puccinia sorghi
11	A0A180GE35	1405427568	SCZ92367.1	45.214	491	9.27e-125	BZ3501_MvSof-1269-A2-R1_Chr2-1g04361	Microbotryum saponariae	Microbotryum saponariae
1	A0A180GE43	1034736522	OAV90602.1	100	336	0	thiazole biosynthetic enzyme, mitochondrial	Puccinia triticina 1-1 BBBD Race 1	Puccinia triticina 1-1 BBBD Race 1
2	A0A180GE92	331240883	XP_003333091.1	81.076	539	0	bleomycin hydrolase	Puccinia graminis f. sp. tritici CRL 75-36-700-3	Puccinia graminis f. sp. tritici CRL 75-36-700-3
7	A0A180GEC1	1384681931	PVG01434.1	52.826	460	2.52e-171	alpha/beta-hydrolase	Serendipita vermifera 'subsp. bescii'	Serendipita vermifera 'subsp. bescii'
19	A0A180GER1	814541740	CEQ40966.1	30.925	346	1.74e-40	SPOSA6832_02652	Sporidiobolus salmonicolor	Sporidiobolus salmonicolor
18	A0A180GEX3	972236596	CEL06012.1	45.455	143	5.35e-26	Putative Small secreted protein	Aspergillus calidoustus	Aspergillus calidoustus
2	A0A180GEX5	403164053	XP_003324136.2	86.182	702	0	X-Pro aminopeptidase	Puccinia graminis f. sp. tritici CRL 75-36-700-3	Puccinia graminis f. sp. tritici CRL 75-36-700-3
1	A0A180GEZ5	1034736421	OAV90503.1	100	417	0	glycine cleavage system T protein	Puccinia triticina 1-1 BBBD Race 1	Puccinia triticina 1-1 BBBD Race 1
7	A0A180GF33	403166009	XP_003325923.2	85.536	560	0	PiT family inorganic phosphate transporter	Puccinia graminis f. sp. tritici CRL 75-36-700-3	Puccinia graminis f. sp. tritici CRL 75-36-700-3
2	A0A180GF72	331222999	XP_003324173.1	95.576	746	0	heat shock 70kDa protein 4	Puccinia graminis f. sp. tritici CRL 75-36-700-3	Puccinia graminis f. sp. tritici CRL 75-36-700-3
8	A0A180GFE5	599360415	XP_007404988.1	69.857	909	0	alanyl aminopeptidase	Melampsora larici-populina 98AG31	Melampsora larici-populina 98AG31
8	A0A180GFJ2	808367144	XP_012188992.1	53.237	417	4.95e-139	phosphoserine aminotransferase	Pseudozyma hubeiensis SY62	Pseudozyma hubeiensis SY62
6	A0A180GFJ3	913850622	KNZ49309.1	89.667	300	0	eukaryotic translation initiation factor 3 subunit G	Puccinia sorghi	Puccinia sorghi
9	A0A180GG12	914261899	KNZ76994.1	35	140	1.13e-11	Chromatin structure-remodeling complex subunit rsc9	Termitomyces sp. J132	Termitomyces sp. J132
2	A0A180GGD1	331232013	XP_003328669.1	87.432	183	1.24e-113	adenine phosphoribosyltransferase	Puccinia graminis f. sp. tritici CRL 75-36-700-3	Puccinia graminis f. sp. tritici CRL 75-36-700-3
0	A0A180GGF1	1034736973	OAV91043.1	100	197	1.12e-140	hypothetical protein PTTG_09164	Puccinia triticina 1-1 BBBD Race 1	Puccinia triticina 1-1 BBBD Race 1
2	A0A180GGI7	331240138	XP_003332720.1	97.992	1046	0	glutamate dehydrogenase	Puccinia graminis f. sp. tritici CRL 75-36-700-3	Puccinia graminis f. sp. tritici CRL 75-36-700-3
8	A0A180GH18	599389150	XP_007410228.1	55.672	476	0	Xaa-Pro dipeptidase	Melampsora larici-populina 98AG31	Melampsora larici-populina 98AG31
0	A0A180GH43	1034737839	OAV91894.1	100	127	1.56e-88	hypothetical protein PTTG_27844	Puccinia triticina 1-1 BBBD Race 1	Puccinia triticina 1-1 BBBD Race 1
1	A0A180GHH2	1034737865	OAV91919.1	100	264	0	6-phosphogluconolactonase	Puccinia triticina 1-1 BBBD Race 1	Puccinia triticina 1-1 BBBD Race 1
4	A0A180GHN1	403166987	XP_003326815.2	85.321	218	1.69e-132	peptidyl-prolyl cis-trans isomerase B (cyclophilin B)	Puccinia graminis f. sp. tritici CRL 75-36-700-3	Puccinia graminis f. sp. tritici CRL 75-36-700-3
7	A0A180GI78	757382426	KIR87772.1	52.121	330	2.04e-100	cytoplasmic protein	Cryptococcus gattii VGIV IND107	Cryptococcus gattii VGIV IND107
1	A0A180GIP3	1034738456	OAV92501.1	100	136	3.98e-93	60S ribosomal protein L27-B	Puccinia triticina 1-1 BBBD Race 1	Puccinia triticina 1-1 BBBD Race 1
11	A0A180GIP7	599427871	XP_007418334.1	67.013	673	0	metallopeptidase MepB	Melampsora larici-populina 98AG31	Melampsora larici-populina 98AG31
13	A0A180GJ22	1023215085	KZT12234.1	44.922	512	4.89e-122	ArfGap-domain-containing protein	Laetiporus sulphureus 93-53	Laetiporus sulphureus 93-53
12	A0A180GJG2	814539761	CEQ42884.1	55.665	406	1.32e-151	SPOSA6832_04744, partial	Sporidiobolus salmonicolor	Sporidiobolus salmonicolor
1	A0A180GJH8	1034738652	OAV92694.1	100	1045	0	valyl-tRNA synthetase	Puccinia triticina 1-1 BBBD Race 1	Puccinia triticina 1-1 BBBD Race 1
3	A0A180GJJ1	331244927	XP_003335102.1	93.789	161	9.79e-99	kinesin family member C1	Puccinia graminis f. sp. tritici CRL 75-36-700-3	Puccinia graminis f. sp. tritici CRL 75-36-700-3
1	A0A180GJP5	1034738856	OAV92895.1	100	2129	0	glutamate synthase	Puccinia triticina 1-1 BBBD Race 1	Puccinia triticina 1-1 BBBD Race 1
5	A0A180GJV9	913836365	KNZ44915.1	85.482	1109	0	eukaryotic translation initiation factor 3 subunit A	Puccinia sorghi	Puccinia sorghi
19	A0A180GK70	1022858099	XP_016271216.1	53.846	208	1.01e-46	transformer-SR ribonucleoprotein	Rhodotorula toruloides;Rhodotorula toruloides NP11	Rhodotorula toruloides;Rhodotorula toruloides NP11
9	A0A180GK88	1183461968	ORY85996.1	65.157	861	0	armadillo-type protein	Leucosporidium creatinivorum	Leucosporidium creatinivorum
28	A0A180GLK7	599416452	XP_007415250.1	36.321	212	1.66e-29	secreted protein	Melampsora larici-populina 98AG31	Melampsora larici-populina 98AG31
2	A0A180GLR4	403168004	XP_003327721.2	96.193	893	0	translation initiation factor eIF-3 subunit 8	Puccinia graminis f. sp. tritici CRL 75-36-700-3	Puccinia graminis f. sp. tritici CRL 75-36-700-3
5	A0A180GLY5	913857357	KNZ52204.1	91.145	463	0	eukaryotic translation initiation factor 3 subunit E, partial	Puccinia sorghi	Puccinia sorghi
1	A0A180GM15	1034739477	OAV93509.1	100	472	0	serine hydroxymethyltransferase	Puccinia triticina 1-1 BBBD Race 1	Puccinia triticina 1-1 BBBD Race 1
5	A0A180GMQ8	1405427236	SCZ91580.1	42.308	260	1.09e-54	BZ3501_MvSof-1269-A2-R1_Chr2-1g04029	Microbotryum saponariae	Microbotryum saponariae
8	A0A180GMS2	913853711	KNZ50533.1	79.768	603	0	importin subunit alpha	Puccinia sorghi	Puccinia sorghi
2	A0A180GMU7	403176423	XP_003335072.2	92.495	493	0	glutathione reductase (NADPH)	Puccinia graminis f. sp. tritici CRL 75-36-700-3	Puccinia graminis f. sp. tritici CRL 75-36-700-3
0	A0A180GMX7	1034739799	OAV93827.1	100	190	6.1e-137	hypothetical protein PTTG_01651	Puccinia triticina 1-1 BBBD Race 1	Puccinia triticina 1-1 BBBD Race 1
1	A0A180GN27	1034740095	OAV94120.1	100	149	5.67e-102	small subunit ribosomal protein S12e	Puccinia triticina 1-1 BBBD Race 1	Puccinia triticina 1-1 BBBD Race 1
1	A0A180GNN1	1034739885	OAV93912.1	100	762	0	protein transporter SEC23	Puccinia triticina 1-1 BBBD Race 1	Puccinia triticina 1-1 BBBD Race 1
0	A0A180GP14	1034740174	OAV94198.1	100	147	3.13e-104	hypothetical protein PTTG_11739, partial	Puccinia triticina 1-1 BBBD Race 1	Puccinia triticina 1-1 BBBD Race 1
11	A0A180GP31	1022850530	XP_016272658.1	56.554	1068	0	26S proteasome regulatory subunit	Rhodotorula toruloides;Rhodotorula toruloides NP11	Rhodotorula toruloides;Rhodotorula toruloides NP11
24	A0A180GP71	983146446	KWU44414.1	35.321	218	6.15e-15	Tudor/PWWP/MBT	Rhodotorula sp. JG-1b	Rhodotorula sp. JG-1b
8	A0A180GPB2	1244195845	PBP20617.1	34.538	249	7.92e-40	putative replication protein A 32 kDa subunit	Diplocarpon rosae	Diplocarpon rosae
1	A0A180GPE4	1034740668	OAV94687.1	100	266	0	small subunit ribosomal protein S2e	Puccinia triticina 1-1 BBBD Race 1	Puccinia triticina 1-1 BBBD Race 1
2	A0A180GPK0	403174925	XP_003333826.2	96.296	108	3.88e-36	60S acidic ribosomal protein P1	Puccinia graminis f. sp. tritici CRL 75-36-700-3	Puccinia graminis f. sp. tritici CRL 75-36-700-3
1	A0A180GPQ3	1034740259	OAV94282.1	100	257	0	phosphomannomutase	Puccinia triticina 1-1 BBBD Race 1	Puccinia triticina 1-1 BBBD Race 1
1	A0A180GQ53	1034740538	OAV94558.1	100	251	0	20S proteasome subunit alpha 7	Puccinia triticina 1-1 BBBD Race 1	Puccinia triticina 1-1 BBBD Race 1
3	A0A180GQ89	331224519	XP_003324931.1	95.252	337	0	stress-induced-phosphoprotein 1	Puccinia graminis f. sp. tritici CRL 75-36-700-3	Puccinia graminis f. sp. tritici CRL 75-36-700-3
1	A0A180GQE1	1034740628	OAV94648.1	100	640	0	arginyl-tRNA synthetase	Puccinia triticina 1-1 BBBD Race 1	Puccinia triticina 1-1 BBBD Race 1
12	A0A180GQH9	1021805427	KZO97673.1	40.58	207	1.65e-51	carbonic anhydrase	Calocera viscosa TUFC12733	Calocera viscosa TUFC12733
14	A0A180GQL8	599352838	XP_007403579.1	66.112	481	0	family 5 glycoside hydrolase	Melampsora larici-populina 98AG31	Melampsora larici-populina 98AG31
1	A0A180GR40	1034740842	OAV94859.1	100	309	0	ATP phosphoribosyltransferase	Puccinia triticina 1-1 BBBD Race 1	Puccinia triticina 1-1 BBBD Race 1
12	A0A180GR64	1419328152	AXA49211.1	40.602	266	9.7e-62	complement component 1 Q subcomponent-binding protein, mitochondrial	Malassezia restricta;Malassezia restricta CBS 7877	Malassezia restricta;Malassezia restricta CBS 7877
12	A0A180GRJ3	1139911648	GAW05166.1	49.767	215	1.83e-46	rna annealing factor	shiitake mushroom	Lentinula edodes
1	A0A180GRR4	1034741064	OAV95079.1	100	405	0	ATP-dependent RNA helicase eIF4A	Puccinia triticina 1-1 BBBD Race 1	Puccinia triticina 1-1 BBBD Race 1
2	A0A180GSD9	403160202	XP_003320755.2	92.366	524	0	carboxypeptidase C	Puccinia graminis f. sp. tritici CRL 75-36-700-3	Puccinia graminis f. sp. tritici CRL 75-36-700-3
1	A0A180GSI0	1034741702	OAV95710.1	100	265	0	40S ribosomal protein S4-A	Puccinia triticina 1-1 BBBD Race 1	Puccinia triticina 1-1 BBBD Race 1
2	A0A180GSW6	403168093	XP_003327794.2	93.924	576	0	myo-inositol-1-phosphate synthase	Puccinia graminis f. sp. tritici CRL 75-36-700-3	Puccinia graminis f. sp. tritici CRL 75-36-700-3
11	A0A180GSX8	1358973177	PRQ73958.1	51.064	329	4.25e-108	Activator of Hsp90 ATPase	Rhodotorula toruloides	Rhodotorula toruloides
0	A0A180GT09	1034741941	OAV95947.1	100	121	7.42e-85	hypothetical protein PTTG_26516	Puccinia triticina 1-1 BBBD Race 1	Puccinia triticina 1-1 BBBD Race 1
1	A0A180GTF4	1034742083	OAV96087.1	100	157	1.24e-114	lactoylglutathione lyase, variant	Puccinia triticina 1-1 BBBD Race 1	Puccinia triticina 1-1 BBBD Race 1
3	A0A180GTG9	331216383	XP_003320871.1	94.565	644	0	methylenetetrahydrofolate reductase (NADPH)	Puccinia graminis f. sp. tritici CRL 75-36-700-3	Puccinia graminis f. sp. tritici CRL 75-36-700-3
1	A0A180GTJ8	1034741701	OAV95709.1	100	152	2.07e-104	small subunit ribosomal protein S14e	Puccinia triticina 1-1 BBBD Race 1	Puccinia triticina 1-1 BBBD Race 1
14	A0A180GTK3	599396609	XP_007411589.1	45.438	559	2.25e-162	carboxylesterase	Melampsora larici-populina 98AG31	Melampsora larici-populina 98AG31
1	A0A180GTY3	1034742007	OAV96011.1	100	526	0	hexokinase	Puccinia triticina 1-1 BBBD Race 1	Puccinia triticina 1-1 BBBD Race 1
0	A0A180GU09	1034741862	OAV95869.1	100	193	8.22e-136	hypothetical protein PTTG_04892	Puccinia triticina 1-1 BBBD Race 1	Puccinia triticina 1-1 BBBD Race 1
1	A0A180GU18	1034741860	OAV95867.1	100	159	2.01e-115	eukaryotic translation initiation factor 5A	Puccinia triticina 1-1 BBBD Race 1	Puccinia triticina 1-1 BBBD Race 1
15	A0A180GUC2	673528429	CDI54720.1	56.637	339	1.14e-122	related to GCY1-galactose-induced protein of aldo/keto reductase family	Melanopsichium pennsylvanicum 4	Melanopsichium pennsylvanicum 4
11	A0A180GUD7	1384676899	PVF96770.1	56.049	405	2.95e-156	putative YDJ1-mitochondrial and ER import protein	Serendipita vermifera 'subsp. bescii'	Serendipita vermifera 'subsp. bescii'
4	A0A180GUJ4	331230998	XP_003328163.1	99.306	288	0	inorganic pyrophosphatase	Puccinia graminis f. sp. tritici CRL 75-36-700-3	Puccinia graminis f. sp. tritici CRL 75-36-700-3
1	A0A180GUQ7	1034742251	OAV96254.1	100	204	2.58e-150	proteasome component PUP3	Puccinia triticina 1-1 BBBD Race 1	Puccinia triticina 1-1 BBBD Race 1
1	A0A180GUS1	1034742125	OAV96129.1	100	538	0	asparaginyl-tRNA synthetase	Puccinia triticina 1-1 BBBD Race 1	Puccinia triticina 1-1 BBBD Race 1
2	A0A180GUT5	403166235	XP_003326111.2	93.359	1039	0	ubiquitin-activating enzyme E1	Puccinia graminis f. sp. tritici CRL 75-36-700-3	Puccinia graminis f. sp. tritici CRL 75-36-700-3
1	A0A180GUU2	1034742145	OAV96149.1	100	1100	0	isoleucyl-tRNA synthetase	Puccinia triticina 1-1 BBBD Race 1	Puccinia triticina 1-1 BBBD Race 1
1	A0A180GV23	331221577	XP_003323463.1	100	149	1.88e-106	protein mago nashi	Puccinia coronata var. avenae f. sp. avenae;Puccinia graminis f. sp. tritici CRL 75-36-700-3;Puccinia triticina 1-1 BBBD Race 1	Puccinia coronata var. avenae f. sp. avenae;Puccinia graminis f. sp. tritici CRL 75-36-700-3;Puccinia triticina 1-1 BBBD Race 1
1	A0A180GVA1	1034742716	OAV96715.1	100	250	0	proteasome subunit alpha type-2	Puccinia triticina 1-1 BBBD Race 1	Puccinia triticina 1-1 BBBD Race 1
1	A0A180GVT4	1034742099	OAV96103.1	100	1145	0	ATP citrate (Pro-S)-lyase	Puccinia triticina 1-1 BBBD Race 1	Puccinia triticina 1-1 BBBD Race 1
2	A0A180GVV7	331217596	XP_003321476.1	74.595	185	4.05e-91	TdcF protein	Puccinia graminis f. sp. tritici CRL 75-36-700-3	Puccinia graminis f. sp. tritici CRL 75-36-700-3
1	A0A180GW06	1034742548	OAV96549.1	100	842	0	elongation factor 2	Puccinia triticina 1-1 BBBD Race 1	Puccinia triticina 1-1 BBBD Race 1
1	A0A180GW39	1034743050	OAV97047.1	100	1208	0	pyruvate carboxylase	Puccinia triticina 1-1 BBBD Race 1	Puccinia triticina 1-1 BBBD Race 1
7	A0A180GW97	599356191	XP_007404190.1	51.789	587	0	La ribonucleoprotein	Melampsora larici-populina 98AG31	Melampsora larici-populina 98AG31
0	A0A180GWB2	1034742638	OAV96638.1	100	504	0	hypothetical protein PTTG_06625	Puccinia triticina 1-1 BBBD Race 1	Puccinia triticina 1-1 BBBD Race 1
1	A0A180GWF8	1034742855	OAV96854.1	100	1403	0	phosphoribosylformylglycinamidine synthase	Puccinia triticina 1-1 BBBD Race 1	Puccinia triticina 1-1 BBBD Race 1
1	A0A180GWJ5	1034742893	OAV96891.1	100	418	0	aspartate aminotransferase	Puccinia triticina 1-1 BBBD Race 1	Puccinia triticina 1-1 BBBD Race 1
2	A0A180GWP0	331243834	XP_003334559.1	95.008	621	0	2-isopropylmalate synthase	Puccinia graminis f. sp. tritici CRL 75-36-700-3	Puccinia graminis f. sp. tritici CRL 75-36-700-3
14	A0A180GX40	599367078	XP_007406221.1	41.176	68	1.69e-10	putative protease inhibitor	Melampsora larici-populina 98AG31	Melampsora larici-populina 98AG31
13	A0A180GXF0	1022846174	XP_016274249.1	34.701	1438	0	nucleoprotein TPR	Rhodotorula toruloides;Rhodotorula toruloides NP11	Rhodotorula toruloides;Rhodotorula toruloides NP11
0	A0A180GXF1	1034742954	OAV96952.1	100	118	1.39e-79	hypothetical protein PTTG_11646	Puccinia triticina 1-1 BBBD Race 1	Puccinia triticina 1-1 BBBD Race 1
33	A0A180GXH2	599421386	XP_007416582.1	40.807	223	1.08e-48	Non-catalytic module family EXPN	Melampsora larici-populina 98AG31	Melampsora larici-populina 98AG31
1	A0A180GXU5	1034742824	OAV96823.1	100	774	0	threonyl-tRNA synthetase	Puccinia triticina 1-1 BBBD Race 1	Puccinia triticina 1-1 BBBD Race 1
10	A0A180GXY5	820657658	CED84888.1	40	800	2.39e-162	CCR4-NOT transcriptional regulation complex, NOT5 subunit	Xanthophyllomyces dendrorhous	Xanthophyllomyces dendrorhous
8	A0A180GY84	1419330194	AXA51113.1	68.908	119	8.29e-54	translation initiation factor 1	Malassezia restricta;Malassezia restricta CBS 7877	Malassezia restricta;Malassezia restricta CBS 7877
1	A0A180GYA2	1034743813	OAV97805.1	100	441	0	actin-like protein 3	Puccinia triticina 1-1 BBBD Race 1	Puccinia triticina 1-1 BBBD Race 1
17	A0A180GYE4	983148031	KWU45989.1	61.89	656	0	polyadenylate binding protein	Rhodotorula sp. JG-1b	Rhodotorula sp. JG-1b
9	A0A180GYG9	1335266216	PNY24149.1	41.296	247	4.12e-36	Protein wos2	Tolypocladium capitatum	Tolypocladium capitatum
11	A0A180GYT3	1183450680	ORY74783.1	57.752	1103	0	P-loop containing nucleoside triphosphate hydrolase protein	Leucosporidium creatinivorum	Leucosporidium creatinivorum
13	A0A180GYV1	342320189	EGU12131.1	45.898	451	5.57e-114	Nuclear segregation protein Bfr1	Rhodotorula toruloides;Rhodotorula toruloides ATCC 204091	Rhodotorula toruloides;Rhodotorula toruloides ATCC 204091
10	A0A180GYX1	588259189	XP_006958748.1	48.712	466	3.2e-128	DnaJ-domain-containing protein	Wallemia mellicola CBS 633.66	Wallemia mellicola CBS 633.66
2	A0A180GYX2	403177241	XP_003335788.2	96.124	129	9.51e-85	E3 ubiquitin ligase complex SCF subunit sconC	Puccinia graminis f. sp. tritici CRL 75-36-700-3	Puccinia graminis f. sp. tritici CRL 75-36-700-3
0	A0A180GZJ2	1034743952	OAV97944.1	100	246	2.74e-177	hypothetical protein PTTG_03168	Puccinia triticina 1-1 BBBD Race 1	Puccinia triticina 1-1 BBBD Race 1
7	A0A180GZZ2	913874446	KNZ60918.1	89.442	1648	0	3-phosphoshikimate 1-carboxyvinyltransferase	Puccinia sorghi	Puccinia sorghi
13	A0A180GZZ7	1022848202	XP_016273315.1	65.772	596	0	protein of carbohydrate kinase, FGGY type family	Rhodotorula toruloides;Rhodotorula toruloides NP11	Rhodotorula toruloides;Rhodotorula toruloides NP11
12	A0A180H029	1405426998	SCZ91122.1	67.793	503	0	BZ3501_MvSof-1269-A2-R1_Chr2-1g03791	Microbotryum saponariae	Microbotryum saponariae
10	A0A180H0M4	1183433781	ORY57998.1	62.722	169	6.07e-71	Redoxin	Leucosporidium creatinivorum	Leucosporidium creatinivorum
3	A0A180H0N9	403163059	XP_003323191.2	91	200	5.45e-135	Fe-Mn family superoxide dismutase	Puccinia graminis f. sp. tritici CRL 75-36-700-3	Puccinia graminis f. sp. tritici CRL 75-36-700-3
0	A0A180H0Y5	1034744279	OAV98269.1	100	118	8.11e-83	hypothetical protein PTTG_11690	Puccinia triticina 1-1 BBBD Race 1	Puccinia triticina 1-1 BBBD Race 1
1	A0A180H104	1034744739	OAV98727.1	100	333	0	serine/threonine-protein phosphatase PP1	Puccinia triticina 1-1 BBBD Race 1	Puccinia triticina 1-1 BBBD Race 1
5	A0A180H165	403171616	XP_003330818.2	84.804	408	0	protein phosphatase	Puccinia graminis f. sp. tritici CRL 75-36-700-3	Puccinia graminis f. sp. tritici CRL 75-36-700-3
18	A0A180H194	353237093	CCA69074.1	47.835	485	1.91e-168	probable proteine disulfate isomerase	Serendipita indica DSM 11827	Serendipita indica DSM 11827
1	A0A180H1L0	1034744919	OAV98906.1	100	219	1.04e-162	20S proteasome subunit beta 1	Puccinia triticina 1-1 BBBD Race 1	Puccinia triticina 1-1 BBBD Race 1
1	A0A180H1M9	1034744939	OAV98926.1	100	392	0	aspartate-semialdehyde dehydrogenase	Puccinia triticina 1-1 BBBD Race 1	Puccinia triticina 1-1 BBBD Race 1
2	A0A180H1U0	1034745011	OAV98997.1	100	345	0	tubulin beta chain, partial	Puccinia triticina 1-1 BBBD Race 1	Puccinia triticina 1-1 BBBD Race 1
1	A0A180H1U7	1034744353	OAV98343.1	100	315	0	guanine nucleotide-binding protein subunit beta-like protein	Puccinia triticina 1-1 BBBD Race 1	Puccinia triticina 1-1 BBBD Race 1
1	A0A180H246	1034744574	OAV98562.1	100	465	0	argininosuccinate lyase	Puccinia triticina 1-1 BBBD Race 1	Puccinia triticina 1-1 BBBD Race 1
1	A0A180H2I0	403163180	XP_003890266.1	100	194	1.56e-143	20S proteasome subunit beta 4	Puccinia graminis f. sp. tritici CRL 75-36-700-3;Puccinia triticina 1-1 BBBD Race 1	Puccinia graminis f. sp. tritici CRL 75-36-700-3;Puccinia triticina 1-1 BBBD Race 1
0	A0A180H2L6	1034744862	OAV98849.1	100	202	1.5e-146	hypothetical protein PTTG_25534	Puccinia triticina 1-1 BBBD Race 1	Puccinia triticina 1-1 BBBD Race 1
11	A0A180H2R4	1216226163	SCV68746.1	55.449	624	0	BQ2448_867	Microbotryum intermedium	Microbotryum intermedium
1	A0A180H2R5	1034744931	OAV98918.1	100	264	0	protein BMH2	Puccinia triticina 1-1 BBBD Race 1	Puccinia triticina 1-1 BBBD Race 1
4	A0A180H2Y5	403160932	XP_003321345.2	68.868	106	5.98e-47	diazepam-binding inhibitor (GABA receptor modulator, acyl-CoA-binding protein)	Puccinia graminis f. sp. tritici CRL 75-36-700-3	Puccinia graminis f. sp. tritici CRL 75-36-700-3
3	A0A180H347	331241053	XP_003333176.1	97.645	552	0	1-pyrroline-5-carboxylate dehydrogenase	Puccinia graminis f. sp. tritici CRL 75-36-700-3	Puccinia graminis f. sp. tritici CRL 75-36-700-3
2	A0A180H352	913861226	KNZ54268.1	97.659	299	0	ribose 5-phosphate isomerase A	Puccinia sorghi	Puccinia sorghi
0	A0A180H359	1034745445	OAV99430.1	100	98	2.51e-66	hypothetical protein PTTG_25377	Puccinia triticina 1-1 BBBD Race 1	Puccinia triticina 1-1 BBBD Race 1
15	A0A180H391	1391633341	PWN46630.1	47.674	344	1.11e-97	putative ran GTPase activating protein 1	Violaceomyces palustris	Violaceomyces palustris
2	A0A180H399	913862893	KNZ55232.1	97.279	147	2.72e-99	large subunit ribosomal protein L14e	Puccinia sorghi	Puccinia sorghi
18	A0A180H3N6	599414743	XP_007414777.1	56.381	431	0	carboxypeptidase S1	Melampsora larici-populina 98AG31	Melampsora larici-populina 98AG31
1	A0A180H3P2	1034745273	OAV99258.1	100	166	2.23e-120	peptidyl-prolyl cis-trans isomerase	Puccinia triticina 1-1 BBBD Race 1	Puccinia triticina 1-1 BBBD Race 1
2	A0A180H3P4	331215715	XP_003320537.1	94.884	430	0	saccharopepsin	Puccinia graminis f. sp. tritici CRL 75-36-700-3	Puccinia graminis f. sp. tritici CRL 75-36-700-3
16	A0A180H3W6	599365444	XP_007405889.1	55.507	227	2.97e-80	secreted protein	Melampsora larici-populina 98AG31	Melampsora larici-populina 98AG31
1	A0A180H402	1034745277	OAV99262.1	100	446	0	enolase	Puccinia triticina 1-1 BBBD Race 1	Puccinia triticina 1-1 BBBD Race 1
38	A0A180H475	599115970	XP_007386031.1	52.846	492	8.38e-179	glucooligosaccharide oxidase	Punctularia strigosozonata HHB-11173 SS5	Punctularia strigosozonata HHB-11173 SS5
0	A0A180H4B6	1034745667	OAV99651.1	100	195	1.43e-143	hypothetical protein PTTG_11722	Puccinia triticina 1-1 BBBD Race 1	Puccinia triticina 1-1 BBBD Race 1
1	A0A180H4G4	1034745894	OAV99877.1	100	247	0	proteasome subunit alpha type-6	Puccinia triticina 1-1 BBBD Race 1	Puccinia triticina 1-1 BBBD Race 1
2	A0A180H4R6	913868600	KNZ58575.1	64.486	856	0	histidinol dehydrogenase	Puccinia sorghi	Puccinia sorghi
2	A0A180H4U5	403178353	XP_003336794.2	94.225	658	0	prolyl-tRNA synthetase	Puccinia graminis f. sp. tritici CRL 75-36-700-3	Puccinia graminis f. sp. tritici CRL 75-36-700-3
11	A0A180H4V3	31087954	AAP42832.1	65.632	419	0	chitinase	Puccinia triticina	Puccinia triticina
36	A0A180H5A4	599115970	XP_007386031.1	54.697	479	0	glucooligosaccharide oxidase	Punctularia strigosozonata HHB-11173 SS5	Punctularia strigosozonata HHB-11173 SS5
14	A0A180H697	1022861811	XP_016270626.1	38.979	431	2.34e-54	translation initiation factor eIF-4B	Rhodotorula toruloides;Rhodotorula toruloides NP11	Rhodotorula toruloides;Rhodotorula toruloides NP11
8	A0A0C4EPC6	913842926	KNZ46699.1	86.667	255	8.64e-156	large subunit ribosomal protein L6e	Puccinia sorghi	Puccinia sorghi
2	A0A077RVB3	1149699938	XP_020155394.1	99.438	356	0	UDP-arabinopyranose mutase 1-like	Aegilops tauschii subsp. tauschii	Aegilops tauschii subsp. tauschii
2	A0A077RX33	1149848137	XP_020192599.1	95.223	314	0	tuliposide A-converting enzyme 2, chloroplastic-like	Aegilops tauschii subsp. tauschii	Aegilops tauschii subsp. tauschii
2	A0A077RYU3	1149706666	XP_020179446.1	98.71	310	0	cytidine deaminase 1	Aegilops tauschii subsp. tauschii	Aegilops tauschii subsp. tauschii
2	A0A077S0N0	1149763711	XP_020147117.1	96.407	334	0	glucan endo-1,3-beta-glucosidase, acidic isoform-like	Aegilops tauschii subsp. tauschii	Aegilops tauschii subsp. tauschii
1	A0A0A7AC77	570339394	AHE76176.1	100	314	0	beta-1,3-endoglucanase, partial	bread wheat	Triticum aestivum
1	A0A0C4BK41	1149719848	XP_020185865.1	100	426	0	26S protease regulatory subunit 7A-like	Triticum urartu;Aegilops tauschii subsp. tauschii	Triticum urartu;Aegilops tauschii subsp. tauschii
1	A0A0C4BKA8	1149815022	XP_020166432.1	100	418	0	26S protease regulatory subunit 8 homolog A-like	domesticated barley;Aegilops tauschii subsp. tauschii	Hordeum vulgare subsp. vulgare;Aegilops tauschii subsp. tauschii
[truncated: 753 more rows]

## Sheet: Sheet4
QUERY
A0A023W4N4
A0A075TNZ7
A0A077RQU9
[truncated: 601 more rows]
