# Supplementary material for: Temporal Quantitative Changes in the Resistant and Susceptible Wheat Leaf Apoplastic Proteome During Infection by Wheat Leaf Rust (Puccinia triticina)
Source: Front Plant Sci. 2019 Oct 23;10:1291. doi: 10.3389/fpls.2019.01291 (PMC6819374; doi:10.3389/fpls.2019.01291)
Supplement: Table S4 — Low abundance Puccinia triticina proteins. [file Table_4.xlsx]

## Sheet: 24 h
Black	Th only		11		Table S4: Low abundance Puccinia proteins, see Tab for time-point.
Blue	Both		0
Green	Lr Only		21
Red	Also seen in Ctrl		14
	LFQ intensity Oil_Lr1_24_5	LFQ intensity Oil_TH_24_5	LFQ intensity Rust_Lr1_24_5	LFQ intensity Rust_TH_24_5	N: Peptides	N: Razor + unique peptides	N: Unique peptides	N: Sequence coverage [%]	N: Unique + razor sequence coverage [%]	N: Unique sequence coverage [%]	N: Mol. weight [kDa]	N: Q-value	N: Score	N: Intensity	N: MS/MS count	T: Protein IDs	T: Majority protein IDs	T: Fasta headers
5				28.7071	1	1	1	1.3	1.3	1.3	92.454	0.0036835	2.6001	3045100000	13	tr|A0A180G945|A0A180G945_PUCT1;tr|A0A0C4EM60|A0A0C4EM60_PUCT1	tr|A0A180G945|A0A180G945_PUCT1;tr|A0A0C4EM60|A0A0C4EM60_PUCT1	tr|A0A180G945|A0A180G945_PUCT1 uncharacterized protein OS=Puccinia triticina (isolate 1-1 / race 1 (BBBD)) GN=PTTG_01849 PE=4 SV=1;tr|A0A0C4EM60|A0A0C4EM60_PUCT1 uncharacterized protein OS=Puccinia triticina (isolate 1-1 / race 1 (BBBD)) PE=4 SV=1
6				26.9977	1	1	1	2.8	2.8	2.8	52.649	0.0084986	2.2366	2540600000	18	tr|A0A180H3X1|A0A180H3X1_PUCT1	tr|A0A180H3X1|A0A180H3X1_PUCT1	tr|A0A180H3X1|A0A180H3X1_PUCT1 uncharacterized protein OS=Puccinia triticina (isolate 1-1 / race 1 (BBBD)) GN=PTTG_25339 PE=4 SV=1
11				26.4998	1	1	1	1.9	1.9	1.9	88.407	0.0096856	2.1603	1263900000	4	tr|A0A180GMW6|A0A180GMW6_PUCT1	tr|A0A180GMW6|A0A180GMW6_PUCT1	tr|A0A180GMW6|A0A180GMW6_PUCT1 uncharacterized protein OS=Puccinia triticina (isolate 1-1 / race 1 (BBBD)) GN=PTTG_27122 PE=4 SV=1
16				25.7624	1	1	1	2.8	2.8	2.8	41.224	0.0020037	3.0049	631460000	9	tr|A0A180G3T5|A0A180G3T5_PUCT1	tr|A0A180G3T5|A0A180G3T5_PUCT1	tr|A0A180G3T5|A0A180G3T5_PUCT1 uncharacterized protein OS=Puccinia triticina (isolate 1-1 / race 1 (BBBD)) GN=PTTG_29486 PE=4 SV=1
19				24.4975	1	1	1	1.7	1.7	1.7	72.214	0.00032563	3.6026	365040000	16	tr|A0A0C4EWD5|A0A0C4EWD5_PUCT1;tr|A0A180GBQ8|A0A180GBQ8_PUCT1	tr|A0A0C4EWD5|A0A0C4EWD5_PUCT1;tr|A0A180GBQ8|A0A180GBQ8_PUCT1	tr|A0A0C4EWD5|A0A0C4EWD5_PUCT1 Acetyl-coenzyme A synthetase OS=Puccinia triticina (isolate 1-1 / race 1 (BBBD)) PE=3 SV=1;tr|A0A180GBQ8|A0A180GBQ8_PUCT1 Acetyl-coenzyme A synthetase OS=Puccinia triticina (isolate 1-1 / race 1 (BBBD)) GN=PTTG_05130 PE=3 SV=
21				25.1141	1	1	1	8.1	8.1	8.1	12.81	0.0050593	2.4056	282470000	12	tr|A0A0C4EHH1|A0A0C4EHH1_PUCT1	tr|A0A0C4EHH1|A0A0C4EHH1_PUCT1	tr|A0A0C4EHH1|A0A0C4EHH1_PUCT1 Small nuclear ribonucleoprotein Sm D2 OS=Puccinia triticina (isolate 1-1 / race 1 (BBBD)) GN=PTTG_00187 PE=4 SV=1
22				26.2431	1	1	1	15.7	15.7	15.7	9.1896	0	6.1404	245440000	2	tr|A0A180G971|A0A180G971_PUCT1;tr|A0A0C4F563|A0A0C4F563_PUCT1	tr|A0A180G971|A0A180G971_PUCT1;tr|A0A0C4F563|A0A0C4F563_PUCT1	tr|A0A180G971|A0A180G971_PUCT1 40S ribosomal protein S27 OS=Puccinia triticina (isolate 1-1 / race 1 (BBBD)) GN=PTTG_08260 PE=3 SV=1;tr|A0A0C4F563|A0A0C4F563_PUCT1 40S ribosomal protein S27 OS=Puccinia triticina (isolate 1-1 / race 1 (BBBD)) PE=3 SV=1
33				23.9653	5	2	2	5.7	3.9	3.9	70.758	0.00017173	4.4076	49641000	4	tr|A0A0C4F2G0|A0A0C4F2G0_PUCT1;tr|A0A180GG57|A0A180GG57_PUCT1	tr|A0A0C4F2G0|A0A0C4F2G0_PUCT1;tr|A0A180GG57|A0A180GG57_PUCT1	tr|A0A0C4F2G0|A0A0C4F2G0_PUCT1 uncharacterized protein OS=Puccinia triticina (isolate 1-1 / race 1 (BBBD)) PE=3 SV=1;tr|A0A180GG57|A0A180GG57_PUCT1 Glucose-regulated protein OS=Puccinia triticina (isolate 1-1 / race 1 (BBBD)) GN=PTTG_07281 PE=3 SV=1
38				23.5758	2	2	2	8.5	8.5	8.5	26.152	0.0085022	2.2382	34879000	4	tr|A0A180GEI4|A0A180GEI4_PUCT1;tr|A0A0C4EH19|A0A0C4EH19_PUCT1	tr|A0A180GEI4|A0A180GEI4_PUCT1;tr|A0A0C4EH19|A0A0C4EH19_PUCT1	tr|A0A180GEI4|A0A180GEI4_PUCT1 uncharacterized protein OS=Puccinia triticina (isolate 1-1 / race 1 (BBBD)) GN=PTTG_00035 PE=4 SV=1;tr|A0A0C4EH19|A0A0C4EH19_PUCT1 uncharacterized protein OS=Puccinia triticina (isolate 1-1 / race 1 (BBBD)) PE=4 SV=1
39				24.3281	1	1	1	3.7	3.7	3.7	33.191	0.0028653	2.8048	30556000	3	tr|A0A0C4F4B8|A0A0C4F4B8_PUCT1	tr|A0A0C4F4B8|A0A0C4F4B8_PUCT1	tr|A0A0C4F4B8|A0A0C4F4B8_PUCT1 uncharacterized protein OS=Puccinia triticina (isolate 1-1 / race 1 (BBBD)) GN=PTTG_07958 PE=4 SV=1
43				22.3164	1	1	1	2.3	2.3	2.3	56.102	0.0015623	3.1146	21401000	2	tr|A0A0C4EIL9|A0A0C4EIL9_PUCT1;tr|A0A180H3P5|A0A180H3P5_PUCT1	tr|A0A0C4EIL9|A0A0C4EIL9_PUCT1;tr|A0A180H3P5|A0A180H3P5_PUCT1	tr|A0A0C4EIL9|A0A0C4EIL9_PUCT1 uncharacterized protein OS=Puccinia triticina (isolate 1-1 / race 1 (BBBD)) PE=4 SV=1;tr|A0A180H3P5|A0A180H3P5_PUCT1 uncharacterized protein OS=Puccinia triticina (isolate 1-1 / race 1 (BBBD)) GN=PTTG_00586 PE=4 SV=1
1		30.2314	31.4484		1	1	1	2.1	2.1	2.1	46.841	0.0020149	3.045	32541000000	60	tr|A0A0C4ESP2|A0A0C4ESP2_PUCT1;tr|A0A180G1R1|A0A180G1R1_PUCT1	tr|A0A0C4ESP2|A0A0C4ESP2_PUCT1;tr|A0A180G1R1|A0A180G1R1_PUCT1	tr|A0A0C4ESP2|A0A0C4ESP2_PUCT1 Adenosylhomocysteinase OS=Puccinia triticina (isolate 1-1 / race 1 (BBBD)) PE=3 SV=1;tr|A0A180G1R1|A0A180G1R1_PUCT1 Adenosylhomocysteinase OS=Puccinia triticina (isolate 1-1 / race 1 (BBBD)) GN=PTTG_03821 PE=3 SV=1
2	29.5821	30.9119	28.9899	28.9969	1	1	1	6	6	6	27.889	0	78.552	14394000000	81	tr|A0A0C4EPC6|A0A0C4EPC6_PUCT1	tr|A0A0C4EPC6|A0A0C4EPC6_PUCT1	tr|A0A0C4EPC6|A0A0C4EPC6_PUCT1 uncharacterized protein OS=Puccinia triticina (isolate 1-1 / race 1 (BBBD)) GN=PTTG_02627 PE=4 SV=1
3	28.5131	29.2097	28.0788	28.1794	2	2	2	0.7	0.7	0.7	272.87	0.0028797	2.8483	6586700000	35	tr|A0A0C4EWN2|A0A0C4EWN2_PUCT1;tr|A0A180GQC3|A0A180GQC3_PUCT1	tr|A0A0C4EWN2|A0A0C4EWN2_PUCT1;tr|A0A180GQC3|A0A180GQC3_PUCT1	tr|A0A0C4EWN2|A0A0C4EWN2_PUCT1 uncharacterized protein OS=Puccinia triticina (isolate 1-1 / race 1 (BBBD)) PE=4 SV=1;tr|A0A180GQC3|A0A180GQC3_PUCT1 uncharacterized protein OS=Puccinia triticina (isolate 1-1 / race 1 (BBBD)) GN=PTTG_05227 PE=4 SV=1
4		28.5225			2	2	2	8.8	8.8	8.8	29.933	0.0067287	2.3197	3169800000	46	tr|A0A180GN03|A0A180GN03_PUCT1;tr|A0A0C4EUC8|A0A0C4EUC8_PUCT1	tr|A0A180GN03|A0A180GN03_PUCT1;tr|A0A0C4EUC8|A0A0C4EUC8_PUCT1	tr|A0A180GN03|A0A180GN03_PUCT1 uncharacterized protein OS=Puccinia triticina (isolate 1-1 / race 1 (BBBD)) GN=PTTG_04407 PE=4 SV=1;tr|A0A0C4EUC8|A0A0C4EUC8_PUCT1 uncharacterized protein OS=Puccinia triticina (isolate 1-1 / race 1 (BBBD)) PE=4 SV=1
7	27.3491	27.6597	26.5258	26.4764	4	3	3	2.1	1.3	1.3	232.53	0	16.377	1806300000	31	tr|A0A0C4EPN4|A0A0C4EPN4_PUCT1;tr|A0A180GJP5|A0A180GJP5_PUCT1	tr|A0A0C4EPN4|A0A0C4EPN4_PUCT1;tr|A0A180GJP5|A0A180GJP5_PUCT1	tr|A0A0C4EPN4|A0A0C4EPN4_PUCT1 uncharacterized protein OS=Puccinia triticina (isolate 1-1 / race 1 (BBBD)) PE=4 SV=1;tr|A0A180GJP5|A0A180GJP5_PUCT1 Glutamate synthase [NADPH] OS=Puccinia triticina (isolate 1-1 / race 1 (BBBD)) GN=PTTG_02737 PE=4 SV=1
8		26.6557		26.5714	2	2	2	5.7	5.7	5.7	50.731	0.002004	3.0064	1724700000	13	tr|A0A0C4ET18|A0A0C4ET18_PUCT1	tr|A0A0C4ET18|A0A0C4ET18_PUCT1	tr|A0A0C4ET18|A0A0C4ET18_PUCT1 Peptide hydrolase OS=Puccinia triticina (isolate 1-1 / race 1 (BBBD)) PE=3 SV=1
9	27.0196	26.7302	25.5052	26.5928	2	2	2	9.4	9.4	9.4	10.981	0	16.762	1591000000	60	tr|A0A180G7W2|A0A180G7W2_PUCT1;tr|A0A0C4F0S9|A0A0C4F0S9_PUCT1	tr|A0A180G7W2|A0A180G7W2_PUCT1;tr|A0A0C4F0S9|A0A0C4F0S9_PUCT1	tr|A0A180G7W2|A0A180G7W2_PUCT1 60S ribosomal protein L44 Q (Fragment) OS=Puccinia triticina (isolate 1-1 / race 1 (BBBD)) GN=PTTG_06699 PE=3 SV=1;tr|A0A0C4F0S9|A0A0C4F0S9_PUCT1 uncharacterized protein OS=Puccinia triticina (isolate 1-1 / race 1 (BBBD)) PE=
10	28.0994				2	2	2	1.1	1.1	1.1	278.68	0.0099426	2.1427	1441700000	26	tr|A0A180H541|A0A180H541_PUCT1;tr|A0A0C4F5L2|A0A0C4F5L2_PUCT1	tr|A0A180H541|A0A180H541_PUCT1;tr|A0A0C4F5L2|A0A0C4F5L2_PUCT1	tr|A0A180H541|A0A180H541_PUCT1 uncharacterized protein OS=Puccinia triticina (isolate 1-1 / race 1 (BBBD)) GN=PTTG_08412 PE=4 SV=1;tr|A0A0C4F5L2|A0A0C4F5L2_PUCT1 uncharacterized protein OS=Puccinia triticina (isolate 1-1 / race 1 (BBBD)) PE=4 SV=1
13		27.7416			1	1	1	1.2	1.2	1.2	77.253	0.00032857	3.7187	909320000	8	tr|A0A180H5X8|A0A180H5X8_PUCT1	tr|A0A180H5X8|A0A180H5X8_PUCT1	tr|A0A180H5X8|A0A180H5X8_PUCT1 uncharacterized protein OS=Puccinia triticina (isolate 1-1 / race 1 (BBBD)) GN=PTTG_25109 PE=4 SV=1
15	26.2569		26.1592		1	1	1	3.4	3.4	3.4	63.941	0.0075563	2.2845	660300000	11	tr|A0A180GRK3|A0A180GRK3_PUCT1;tr|A0A0C4EV38|A0A0C4EV38_PUCT1	tr|A0A180GRK3|A0A180GRK3_PUCT1;tr|A0A0C4EV38|A0A0C4EV38_PUCT1	tr|A0A180GRK3|A0A180GRK3_PUCT1 uncharacterized protein OS=Puccinia triticina (isolate 1-1 / race 1 (BBBD)) GN=PTTG_04670 PE=4 SV=1;tr|A0A0C4EV38|A0A0C4EV38_PUCT1 uncharacterized protein OS=Puccinia triticina (isolate 1-1 / race 1 (BBBD)) PE=4 SV=1
18	24.7914				3	3	3	7	7	7	43.701	0	6.1946	389780000	46	tr|A0A0C4EYI8|A0A0C4EYI8_PUCT1;tr|A0A180GXR5|A0A180GXR5_PUCT1;tr|A0A0C4FCF4|A0A0C4FCF4_PUCT1	tr|A0A0C4EYI8|A0A0C4EYI8_PUCT1;tr|A0A180GXR5|A0A180GXR5_PUCT1	tr|A0A0C4EYI8|A0A0C4EYI8_PUCT1 uncharacterized protein OS=Puccinia triticina (isolate 1-1 / race 1 (BBBD)) PE=3 SV=1;tr|A0A180GXR5|A0A180GXR5_PUCT1 60S ribosomal protein L3 OS=Puccinia triticina (isolate 1-1 / race 1 (BBBD)) GN=PTTG_05888 PE=3 SV=1
25		24.746			5	1	1	7.4	1.8	1.8	80.403	0.00017164	4.4042	109160000	3	tr|A0A0C4F197|A0A0C4F197_PUCT1;tr|A0A180G5Y9|A0A180G5Y9_PUCT1	tr|A0A0C4F197|A0A0C4F197_PUCT1;tr|A0A180G5Y9|A0A180G5Y9_PUCT1	tr|A0A0C4F197|A0A0C4F197_PUCT1 uncharacterized protein OS=Puccinia triticina (isolate 1-1 / race 1 (BBBD)) PE=3 SV=1;tr|A0A180G5Y9|A0A180G5Y9_PUCT1 Heat shock protein 90-1 OS=Puccinia triticina (isolate 1-1 / race 1 (BBBD)) GN=PTTG_06867 PE=3 SV=1
37		25.2668			2	2	2	15	15	15	20.692	0.0083712	2.2499	35343000	2	tr|A0A180GAN6|A0A180GAN6_PUCT1	tr|A0A180GAN6|A0A180GAN6_PUCT1	tr|A0A180GAN6|A0A180GAN6_PUCT1 uncharacterized protein (Fragment) OS=Puccinia triticina (isolate 1-1 / race 1 (BBBD)) GN=PTTG_12681 PE=4 SV=1
44	22.8083				1	1	1	3.8	3.8	3.8	43.047	0.0031371	2.7336	12751000	1	tr|A0A0C4EH83|A0A0C4EH83_PUCT1	tr|A0A0C4EH83|A0A0C4EH83_PUCT1	tr|A0A0C4EH83|A0A0C4EH83_PUCT1 Deoxyhypusine synthase OS=Puccinia triticina (isolate 1-1 / race 1 (BBBD)) GN=PTTG_00099 PE=4 SV=1
12			26.2791		1	1	1	5.9	5.9	5.9	27.672	0.00048309	3.4591	930270000	6	tr|A0A180G327|A0A180G327_PUCT1;tr|A0A0C4EPB2|A0A0C4EPB2_PUCT1	tr|A0A180G327|A0A180G327_PUCT1;tr|A0A0C4EPB2|A0A0C4EPB2_PUCT1	tr|A0A180G327|A0A180G327_PUCT1 Triosephosphate isomerase OS=Puccinia triticina (isolate 1-1 / race 1 (BBBD)) GN=PTTG_02613 PE=3 SV=1;tr|A0A0C4EPB2|A0A0C4EPB2_PUCT1 Triosephosphate isomerase OS=Puccinia triticina (isolate 1-1 / race 1 (BBBD)) PE=3 SV=1
14			27.0682		11	6	5	45.3	30.1	22.7	28.458	0	10.889	827360000	20	tr|A0A180H2T8|A0A180H2T8_PUCT1;tr|A0A180H2R5|A0A180H2R5_PUCT1;tr|A0A0C4EYA2|A0A0C4EYA2_PUCT1	tr|A0A180H2T8|A0A180H2T8_PUCT1;tr|A0A180H2R5|A0A180H2R5_PUCT1;tr|A0A0C4EYA2|A0A0C4EYA2_PUCT1	tr|A0A180H2T8|A0A180H2T8_PUCT1 Protein BMH2, variant OS=Puccinia triticina (isolate 1-1 / race 1 (BBBD)) GN=PTTG_05801 PE=3 SV=1;tr|A0A180H2R5|A0A180H2R5_PUCT1 Protein BMH2 OS=Puccinia triticina (isolate 1-1 / race 1 (BBBD)) GN=PTTG_05801 PE=3 SV=1;tr|A0A0
17			28.7542		6	6	6	19	19	19	33.847	0	10.34	391260000	7	tr|A0A0C4ENY3|A0A0C4ENY3_PUCT1;tr|A0A180G1J2|A0A180G1J2_PUCT1;tr|A0A0C4FCG7|A0A0C4FCG7_PUCT1	tr|A0A0C4ENY3|A0A0C4ENY3_PUCT1;tr|A0A180G1J2|A0A180G1J2_PUCT1;tr|A0A0C4FCG7|A0A0C4FCG7_PUCT1	tr|A0A0C4ENY3|A0A0C4ENY3_PUCT1 uncharacterized protein OS=Puccinia triticina (isolate 1-1 / race 1 (BBBD)) PE=4 SV=1;tr|A0A180G1J2|A0A180G1J2_PUCT1 Transaldolase (Fragment) OS=Puccinia triticina (isolate 1-1 / race 1 (BBBD)) GN=PTTG_29878 PE=3 SV=1;tr|A0A0
20			27.2226		9	9	9	29.6	29.6	29.6	47.379	0	82.112	317540000	11	tr|A0A180H402|A0A180H402_PUCT1;tr|A0A0C4EI64|A0A0C4EI64_PUCT1	tr|A0A180H402|A0A180H402_PUCT1;tr|A0A0C4EI64|A0A0C4EI64_PUCT1	tr|A0A180H402|A0A180H402_PUCT1 Enolase OS=Puccinia triticina (isolate 1-1 / race 1 (BBBD)) GN=PTTG_00430 PE=3 SV=1;tr|A0A0C4EI64|A0A0C4EI64_PUCT1 uncharacterized protein OS=Puccinia triticina (isolate 1-1 / race 1 (BBBD)) PE=3 SV=1
23			26.5306		2	2	2	18.1	18.1	18.1	13.919	0	9.1836	209360000	4	tr|A0A180FX95|A0A180FX95_PUCT1	tr|A0A180FX95|A0A180FX95_PUCT1	tr|A0A180FX95|A0A180FX95_PUCT1 uncharacterized protein OS=Puccinia triticina (isolate 1-1 / race 1 (BBBD)) GN=PTTG_12725 PE=4 SV=1
24			26.4137		4	4	4	8.6	8.6	8.6	69.861	0	8.237	110290000	6	tr|A0A0C4F9B4|A0A0C4F9B4_PUCT1	tr|A0A0C4F9B4|A0A0C4F9B4_PUCT1	tr|A0A0C4F9B4|A0A0C4F9B4_PUCT1 uncharacterized protein OS=Puccinia triticina (isolate 1-1 / race 1 (BBBD)) GN=PTTG_09784 PE=4 SV=1
26			26.2129		1	1	1	11.3	11.3	11.3	16.569	0	33.765	79976000	1	tr|A0A0C4EM80|A0A0C4EM80_PUCT1	tr|A0A0C4EM80|A0A0C4EM80_PUCT1	tr|A0A0C4EM80|A0A0C4EM80_PUCT1 Nucleoside diphosphate kinase OS=Puccinia triticina (isolate 1-1 / race 1 (BBBD)) GN=PTTG_01869 PE=3 SV=1
27			25.9347		2	2	2	3.7	3.7	3.7	85.149	0	11.578	77661000	4	tr|A0A0C4EP78|A0A0C4EP78_PUCT1	tr|A0A0C4EP78|A0A0C4EP78_PUCT1	tr|A0A0C4EP78|A0A0C4EP78_PUCT1 Aconitate hydratase, mitochondrial OS=Puccinia triticina (isolate 1-1 / race 1 (BBBD)) GN=PTTG_02579 PE=3 SV=1
28			26.6211		4	4	4	14.8	14.8	14.8	33.781	0.0028701	2.821	77367000	6	tr|A0A0C4ERL0|A0A0C4ERL0_PUCT1;tr|A0A180GUJ4|A0A180GUJ4_PUCT1	tr|A0A0C4ERL0|A0A0C4ERL0_PUCT1;tr|A0A180GUJ4|A0A180GUJ4_PUCT1	tr|A0A0C4ERL0|A0A0C4ERL0_PUCT1 uncharacterized protein OS=Puccinia triticina (isolate 1-1 / race 1 (BBBD)) PE=4 SV=1;tr|A0A180GUJ4|A0A180GUJ4_PUCT1 uncharacterized protein OS=Puccinia triticina (isolate 1-1 / race 1 (BBBD)) GN=PTTG_03429 PE=4 SV=1
29			26.0045		2	2	2	37	37	37	8.5913	0.00017556	4.7513	70202000	3	tr|A0A0C4EIJ7|A0A0C4EIJ7_PUCT1	tr|A0A0C4EIJ7|A0A0C4EIJ7_PUCT1	tr|A0A0C4EIJ7|A0A0C4EIJ7_PUCT1 uncharacterized protein OS=Puccinia triticina (isolate 1-1 / race 1 (BBBD)) GN=PTTG_25230 PE=4 SV=1
30			26.0163		9	2	2	16.5	5.4	5.4	70.902	0.0014182	3.2052	69761000	3	tr|A0A0C4ERQ8|A0A0C4ERQ8_PUCT1	tr|A0A0C4ERQ8|A0A0C4ERQ8_PUCT1	tr|A0A0C4ERQ8|A0A0C4ERQ8_PUCT1 Heat shock protein HSS1 OS=Puccinia triticina (isolate 1-1 / race 1 (BBBD)) GN=PTTG_03478 PE=3 SV=1
31			26.0555		2	2	2	3.9	3.9	3.9	60.694	0.00017109	4.3461	57313000	2	tr|A0A0C4EN28|A0A0C4EN28_PUCT1	tr|A0A0C4EN28|A0A0C4EN28_PUCT1	tr|A0A0C4EN28|A0A0C4EN28_PUCT1 Phosphoglucomutase OS=Puccinia triticina (isolate 1-1 / race 1 (BBBD)) GN=PTTG_02168 PE=3 SV=1
32			25.4645		2	2	2	3	3	3	85.501	0.00032557	3.6015	51168000	2	tr|A0A0C4EZX0|A0A0C4EZX0_PUCT1	tr|A0A0C4EZX0|A0A0C4EZX0_PUCT1	tr|A0A0C4EZX0|A0A0C4EZX0_PUCT1 5-methyltetrahydropteroyltriglutamate-homocysteine methyltransferase OS=Puccinia triticina (isolate 1-1 / race 1 (BBBD)) GN=PTTG_06381 PE=3 SV=1
34			25.0731		3	3	3	11.5	11.5	11.5	51.561	0.00017106	4.3442	48565000	3	tr|A0A0C4F8C0|A0A0C4F8C0_PUCT1	tr|A0A0C4F8C0|A0A0C4F8C0_PUCT1	tr|A0A0C4F8C0|A0A0C4F8C0_PUCT1 Citrate synthase OS=Puccinia triticina (isolate 1-1 / race 1 (BBBD)) GN=PTTG_09412 PE=3 SV=1
35			25.7771		1	1	1	20.4	20.4	20.4	10.335	0.0059001	2.3604	37524000	2	tr|A0A180H359|A0A180H359_PUCT1	tr|A0A180H359|A0A180H359_PUCT1	tr|A0A180H359|A0A180H359_PUCT1 uncharacterized protein OS=Puccinia triticina (isolate 1-1 / race 1 (BBBD)) GN=PTTG_25377 PE=4 SV=1
36			25.2237		2	2	2	9.1	9.1	9.1	37.971	0.0038174	2.5633	36435000	2	tr|A0A0C4DF31|A0A0C4DF31_PUCT1	tr|A0A0C4DF31|A0A0C4DF31_PUCT1	tr|A0A0C4DF31|A0A0C4DF31_PUCT1 Glycerol-3-phosphate dehydrogenase [NAD(+)] OS=Puccinia triticina (isolate 1-1 / race 1 (BBBD)) GN=PTTG_03574 PE=3 SV=1
40			24.9852		2	2	2	10.9	10.9	10.9	40.701	0	8.0626	30230000	6	tr|A0A0C4EKV3|A0A0C4EKV3_PUCT1;tr|A0A180GCC9|A0A180GCC9_PUCT1	tr|A0A0C4EKV3|A0A0C4EKV3_PUCT1;tr|A0A180GCC9|A0A180GCC9_PUCT1	tr|A0A0C4EKV3|A0A0C4EKV3_PUCT1 uncharacterized protein OS=Puccinia triticina (isolate 1-1 / race 1 (BBBD)) PE=3 SV=1;tr|A0A180GCC9|A0A180GCC9_PUCT1 uncharacterized protein OS=Puccinia triticina (isolate 1-1 / race 1 (BBBD)) GN=PTTG_01381 PE=3 SV=1
41			24.3624		2	2	2	12.6	12.6	12.6	38.006	0.001414	3.1647	29538000	2	tr|A0A0C4ES78|A0A0C4ES78_PUCT1	tr|A0A0C4ES78|A0A0C4ES78_PUCT1	tr|A0A0C4ES78|A0A0C4ES78_PUCT1 uncharacterized protein OS=Puccinia triticina (isolate 1-1 / race 1 (BBBD)) GN=PTTG_03652 PE=4 SV=1
42			23.5047		2	2	2	18.1	18.1	18.1	16.604	0	6.0841	27497000	2	tr|A0A0C4EI30|A0A0C4EI30_PUCT1;tr|A0A180GZS4|A0A180GZS4_PUCT1	tr|A0A0C4EI30|A0A0C4EI30_PUCT1;tr|A0A180GZS4|A0A180GZS4_PUCT1	tr|A0A0C4EI30|A0A0C4EI30_PUCT1 uncharacterized protein OS=Puccinia triticina (isolate 1-1 / race 1 (BBBD)) PE=4 SV=1;tr|A0A180GZS4|A0A180GZS4_PUCT1 uncharacterized protein OS=Puccinia triticina (isolate 1-1 / race 1 (BBBD)) GN=PTTG_00396 PE=4 SV=1
45			23.552		1	1	1	2.1	2.1	2.1	61.891	0.0065874	2.321	12322000	1	tr|A0A0C4F0U2|A0A0C4F0U2_PUCT1;tr|A0A180GN49|A0A180GN49_PUCT1	tr|A0A0C4F0U2|A0A0C4F0U2_PUCT1;tr|A0A180GN49|A0A180GN49_PUCT1	tr|A0A0C4F0U2|A0A0C4F0U2_PUCT1 uncharacterized protein OS=Puccinia triticina (isolate 1-1 / race 1 (BBBD)) PE=4 SV=1;tr|A0A180GN49|A0A180GN49_PUCT1 uncharacterized protein OS=Puccinia triticina (isolate 1-1 / race 1 (BBBD)) GN=PTTG_06712 PE=4 SV=1
46			23.1469		3	1	1	14.5	6.1	6.1	28.635	0.0011051	3.2378	10666000	1	tr|A0A0C4ERW8|A0A0C4ERW8_PUCT1	tr|A0A0C4ERW8|A0A0C4ERW8_PUCT1	tr|A0A0C4ERW8|A0A0C4ERW8_PUCT1 Proteasome subunit alpha type OS=Puccinia triticina (isolate 1-1 / race 1 (BBBD)) GN=PTTG_03538 PE=3 SV=1

## Sheet: 48 h
Black	Th only		14		Table S4: Low abundance Puccinia proteins, see Tab for time-point.
Blue	Both		3
Green	Lr Only		8
Red	Also seen in Ctrl		10
	LFQ intensity Oil_Lr1_24_5	LFQ intensity Oil_TH_24_5	LFQ intensity Rust_Lr1_24_5	LFQ intensity Rust_TH_24_5	N: Peptides	N: Razor + unique peptides	N: Unique peptides	N: Sequence coverage [%]	N: Unique + razor sequence coverage [%]	N: Unique sequence coverage [%]	N: Mol. weight [kDa]	N: Q-value	N: Score	N: Intensity	N: MS/MS count	T: Protein IDs	T: Majority protein IDs	T: Fasta headers
5				29.1722	2	2	2	6.1	6.1	6.1	50.337	0.0048294	2.8963	1422500000	8	tr|A0A180GUR3|A0A180GUR3_PUCT1;tr|A0A0C4FA89|A0A0C4FA89_PUCT1	tr|A0A180GUR3|A0A180GUR3_PUCT1;tr|A0A0C4FA89|A0A0C4FA89_PUCT1	tr|A0A180GUR3|A0A180GUR3_PUCT1 Uncharacterized protein OS=Puccinia triticina (isolate 1-1 / race 1 (BBBD)) GN=PTTG_26447 PE=4 SV=1;tr|A0A0C4FA89|A0A0C4FA89_PUCT1 Uncharacterized protein OS=Puccinia triticina (isolate 1-1 / race 1 (BBBD)) PE=4 SV=1
8				25.1994	1	1	1	1	1	1	146.8	0.0078444	2.6737	834830000	6	tr|A0A0C4F7G0|A0A0C4F7G0_PUCT1	tr|A0A0C4F7G0|A0A0C4F7G0_PUCT1	tr|A0A0C4F7G0|A0A0C4F7G0_PUCT1 Uncharacterized protein OS=Puccinia triticina (isolate 1-1 / race 1 (BBBD)) PE=4 SV=1
11				26.7717	2	2	2	4.3	4.3	4.3	50.827	0.0054235	2.8215	604450000	15	tr|A0A180H1X3|A0A180H1X3_PUCT1;tr|A0A0C4ELZ6|A0A0C4ELZ6_PUCT1	tr|A0A180H1X3|A0A180H1X3_PUCT1;tr|A0A0C4ELZ6|A0A0C4ELZ6_PUCT1	tr|A0A180H1X3|A0A180H1X3_PUCT1 Uncharacterized protein OS=Puccinia triticina (isolate 1-1 / race 1 (BBBD)) GN=PTTG_01785 PE=4 SV=1;tr|A0A0C4ELZ6|A0A0C4ELZ6_PUCT1 Uncharacterized protein OS=Puccinia triticina (isolate 1-1 / race 1 (BBBD)) PE=4 SV=1
12			27.3152		11	6	4	42.6	31.2	19.9	28.458	0	30.056	563620000	15	tr|A0A180H2T8|A0A180H2T8_PUCT1;tr|A0A180H2R5|A0A180H2R5_PUCT1;tr|A0A0C4EYA2|A0A0C4EYA2_PUCT1	tr|A0A180H2T8|A0A180H2T8_PUCT1;tr|A0A180H2R5|A0A180H2R5_PUCT1;tr|A0A0C4EYA2|A0A0C4EYA2_PUCT1	tr|A0A180H2T8|A0A180H2T8_PUCT1 Protein BMH2, variant OS=Puccinia triticina (isolate 1-1 / race 1 (BBBD)) GN=PTTG_05801 PE=3 SV=1;tr|A0A180H2R5|A0A180H2R5_PUCT1 Protein BMH2 OS=Puccinia triticina (isolate 1-1 / race 1 (BBBD)) GN=PTTG_05801 PE=3 SV=1;tr|A0A0
13				27.1946	1	1	1	5.9	5.9	5.9	27.672	0	5.0876	514640000	10	tr|A0A180G327|A0A180G327_PUCT1;tr|A0A0C4EPB2|A0A0C4EPB2_PUCT1	tr|A0A180G327|A0A180G327_PUCT1;tr|A0A0C4EPB2|A0A0C4EPB2_PUCT1	tr|A0A180G327|A0A180G327_PUCT1 Triosephosphate isomerase OS=Puccinia triticina (isolate 1-1 / race 1 (BBBD)) GN=PTTG_02613 PE=3 SV=1;tr|A0A0C4EPB2|A0A0C4EPB2_PUCT1 Triosephosphate isomerase OS=Puccinia triticina (isolate 1-1 / race 1 (BBBD)) PE=3 SV=1
14				27.5817	1	1	1	1.2	1.2	1.2	77.253	0.007837	2.6667	480850000	4	tr|A0A180H5X8|A0A180H5X8_PUCT1	tr|A0A180H5X8|A0A180H5X8_PUCT1	tr|A0A180H5X8|A0A180H5X8_PUCT1 Uncharacterized protein OS=Puccinia triticina (isolate 1-1 / race 1 (BBBD)) GN=PTTG_25109 PE=4 SV=1
15				25.6438	1	1	1	3.3	3.3	3.3	50.342	0.0086393	2.5225	473330000	10	tr|A0A180GBM1|A0A180GBM1_PUCT1;tr|A0A0C4F4V9|A0A0C4F4V9_PUCT1	tr|A0A180GBM1|A0A180GBM1_PUCT1;tr|A0A0C4F4V9|A0A0C4F4V9_PUCT1	tr|A0A180GBM1|A0A180GBM1_PUCT1 Uncharacterized protein OS=Puccinia triticina (isolate 1-1 / race 1 (BBBD)) GN=PTTG_08151 PE=4 SV=1;tr|A0A0C4F4V9|A0A0C4F4V9_PUCT1 Uncharacterized protein OS=Puccinia triticina (isolate 1-1 / race 1 (BBBD)) PE=4 SV=1
17				25.6171	2	2	2	0.7	0.7	0.7	270.96	0.0052749	2.8385	392820000	5	tr|A0A0C4F5D0|A0A0C4F5D0_PUCT1	tr|A0A0C4F5D0|A0A0C4F5D0_PUCT1	tr|A0A0C4F5D0|A0A0C4F5D0_PUCT1 Uncharacterized protein OS=Puccinia triticina (isolate 1-1 / race 1 (BBBD)) PE=4 SV=1
20				27.0234	3	3	3	6.8	6.8	6.8	50.258	0.0010438	3.7396	331580000	4	tr|A0A0C4F0U7|A0A0C4F0U7_PUCT1	tr|A0A0C4F0U7|A0A0C4F0U7_PUCT1	tr|A0A0C4F0U7|A0A0C4F0U7_PUCT1 Uncharacterized protein OS=Puccinia triticina (isolate 1-1 / race 1 (BBBD)) GN=PTTG_06717 PE=3 SV=1
21				25.7915	1	1	1	2.8	2.8	2.8	41.224	0.0063422	2.7679	222880000	4	tr|A0A180G3T5|A0A180G3T5_PUCT1	tr|A0A180G3T5|A0A180G3T5_PUCT1	tr|A0A180G3T5|A0A180G3T5_PUCT1 Uncharacterized protein OS=Puccinia triticina (isolate 1-1 / race 1 (BBBD)) GN=PTTG_29486 PE=4 SV=1
22				25.4898	2	2	2	1.7	1.7	1.7	155.17	0.0040843	3.053	162580000	5	tr|A0A180H0T5|A0A180H0T5_PUCT1;tr|A0A180H1W5|A0A180H1W5_PUCT1;tr|A0A0C4ELW8|A0A0C4ELW8_PUCT1	tr|A0A180H0T5|A0A180H0T5_PUCT1;tr|A0A180H1W5|A0A180H1W5_PUCT1;tr|A0A0C4ELW8|A0A0C4ELW8_PUCT1	tr|A0A180H0T5|A0A180H0T5_PUCT1 Uncharacterized protein OS=Puccinia triticina (isolate 1-1 / race 1 (BBBD)) GN=PTTG_01756 PE=4 SV=1;tr|A0A180H1W5|A0A180H1W5_PUCT1 Uncharacterized protein OS=Puccinia triticina (isolate 1-1 / race 1 (BBBD)) GN=PTTG_01756 PE=4
23				26.8644	2	2	2	2.8	2.8	2.8	68.906	0.0083604	2.5496	135140000	2	A0A1D5XS09;tr|A0A0C4EJR6|A0A0C4EJR6_PUCT1;A0A1D5XS10;B7U6L5;I6QQ39;B7U6L4;A0A1D5Y5R2;A0A1D5Y5R3;W5ECA4;W5EST8;A0A1D5X6G4;Q7DMU0	A0A1D5XS09;tr|A0A0C4EJR6|A0A0C4EJR6_PUCT1;A0A1D5XS10;B7U6L5;I6QQ39;B7U6L4;A0A1D5Y5R2;A0A1D5Y5R3;W5ECA4;W5EST8;A0A1D5X6G4;Q7DMU0	tr|A0A1D5XS09|A0A1D5XS09_WHEAT Uncharacterized protein OS=Triticum aestivum PE=4 SV=1;tr|A0A0C4EJR6|A0A0C4EJR6_PUCT1 Uncharacterized protein OS=Puccinia triticina (isolate 1-1 / race 1 (BBBD)) GN=PTTG_00987 PE=4 SV=1;tr|A0A1D5XS10|A0A1D5XS10_WHEAT Uncharac
28		23.8493			5	1	1	7.4	1.8	1.8	80.403	0.00087997	3.8623	92866000	7	tr|A0A0C4F197|A0A0C4F197_PUCT1;tr|A0A180G5Y9|A0A180G5Y9_PUCT1	tr|A0A0C4F197|A0A0C4F197_PUCT1;tr|A0A180G5Y9|A0A180G5Y9_PUCT1	tr|A0A0C4F197|A0A0C4F197_PUCT1 Uncharacterized protein OS=Puccinia triticina (isolate 1-1 / race 1 (BBBD)) PE=3 SV=1;tr|A0A180G5Y9|A0A180G5Y9_PUCT1 Heat shock protein 90-1 OS=Puccinia triticina (isolate 1-1 / race 1 (BBBD)) GN=PTTG_06867 PE=3 SV=1
31				24.1103	1	1	1	11.3	11.3	11.3	16.569	0	13.772	47131000	2	tr|A0A0C4EM80|A0A0C4EM80_PUCT1	tr|A0A0C4EM80|A0A0C4EM80_PUCT1	tr|A0A0C4EM80|A0A0C4EM80_PUCT1 Nucleoside diphosphate kinase OS=Puccinia triticina (isolate 1-1 / race 1 (BBBD)) GN=PTTG_01869 PE=3 SV=1
1			31.002	30.8679	4	4	4	13	13	13	47.054	0	6.93	29505000000	70	tr|A0A180G1R1|A0A180G1R1_PUCT1;tr|A0A0C4ESP2|A0A0C4ESP2_PUCT1	tr|A0A180G1R1|A0A180G1R1_PUCT1;tr|A0A0C4ESP2|A0A0C4ESP2_PUCT1	tr|A0A180G1R1|A0A180G1R1_PUCT1 Adenosylhomocysteinase OS=Puccinia triticina (isolate 1-1 / race 1 (BBBD)) GN=PTTG_03821 PE=3 SV=1;tr|A0A0C4ESP2|A0A0C4ESP2_PUCT1 Adenosylhomocysteinase OS=Puccinia triticina (isolate 1-1 / race 1 (BBBD)) PE=3 SV=1
16			26.567	24.8942	8	4	2	27.7	14.1	6.1	40.157	0	21.037	406970000	11	tr|A0A0C4ERA6|A0A0C4ERA6_PUCT1	tr|A0A0C4ERA6|A0A0C4ERA6_PUCT1	tr|A0A0C4ERA6|A0A0C4ERA6_PUCT1 Uncharacterized protein OS=Puccinia triticina (isolate 1-1 / race 1 (BBBD)) PE=3 SV=1
18			27.2099	26.1428	3	3	3	24.4	24.4	24.4	13.919	0	9.9553	383390000	18	tr|A0A180FX95|A0A180FX95_PUCT1	tr|A0A180FX95|A0A180FX95_PUCT1	tr|A0A180FX95|A0A180FX95_PUCT1 Uncharacterized protein OS=Puccinia triticina (isolate 1-1 / race 1 (BBBD)) GN=PTTG_12725 PE=4 SV=1
2	29.5169	30.1756	27.8817	27.4348	1	1	1	6	6	6	27.889	0	21.26	7643900000	47	tr|A0A0C4EPC6|A0A0C4EPC6_PUCT1	tr|A0A0C4EPC6|A0A0C4EPC6_PUCT1	tr|A0A0C4EPC6|A0A0C4EPC6_PUCT1 Uncharacterized protein OS=Puccinia triticina (isolate 1-1 / race 1 (BBBD)) GN=PTTG_02627 PE=4 SV=1
3	28.5106				1	1	1	1.3	1.3	1.3	92.454	0.0034653	3.1409	3545200000	17	tr|A0A180G945|A0A180G945_PUCT1;tr|A0A0C4EM60|A0A0C4EM60_PUCT1	tr|A0A180G945|A0A180G945_PUCT1;tr|A0A0C4EM60|A0A0C4EM60_PUCT1	tr|A0A180G945|A0A180G945_PUCT1 Uncharacterized protein OS=Puccinia triticina (isolate 1-1 / race 1 (BBBD)) GN=PTTG_01849 PE=4 SV=1;tr|A0A0C4EM60|A0A0C4EM60_PUCT1 Uncharacterized protein OS=Puccinia triticina (isolate 1-1 / race 1 (BBBD)) PE=4 SV=1
4	28.1665	28.042	27.1894		2	2	2	0.7	0.7	0.7	272.87	0.007985	2.6575	2454300000	20	tr|A0A0C4EWN2|A0A0C4EWN2_PUCT1;tr|A0A180GQC3|A0A180GQC3_PUCT1	tr|A0A0C4EWN2|A0A0C4EWN2_PUCT1;tr|A0A180GQC3|A0A180GQC3_PUCT1	tr|A0A0C4EWN2|A0A0C4EWN2_PUCT1 Uncharacterized protein OS=Puccinia triticina (isolate 1-1 / race 1 (BBBD)) PE=4 SV=1;tr|A0A180GQC3|A0A180GQC3_PUCT1 Uncharacterized protein OS=Puccinia triticina (isolate 1-1 / race 1 (BBBD)) GN=PTTG_05227 PE=4 SV=1
6	27.3856	26.8208			3	2	2	1.7	0.9	0.9	232.53	0	33.644	1315800000	22	tr|A0A0C4EPN4|A0A0C4EPN4_PUCT1;tr|A0A180GJP5|A0A180GJP5_PUCT1	tr|A0A0C4EPN4|A0A0C4EPN4_PUCT1;tr|A0A180GJP5|A0A180GJP5_PUCT1	tr|A0A0C4EPN4|A0A0C4EPN4_PUCT1 Uncharacterized protein OS=Puccinia triticina (isolate 1-1 / race 1 (BBBD)) PE=4 SV=1;tr|A0A180GJP5|A0A180GJP5_PUCT1 Glutamate synthase [NADPH] OS=Puccinia triticina (isolate 1-1 / race 1 (BBBD)) GN=PTTG_02737 PE=4 SV=1
7	24.766	25.9778	27.3062	27.0852	2	2	2	9.4	9.4	9.4	10.981	0	7.6635	986780000	35	tr|A0A180G7W2|A0A180G7W2_PUCT1;tr|A0A0C4F0S9|A0A0C4F0S9_PUCT1	tr|A0A180G7W2|A0A180G7W2_PUCT1;tr|A0A0C4F0S9|A0A0C4F0S9_PUCT1	tr|A0A180G7W2|A0A180G7W2_PUCT1 60S ribosomal protein L44 Q (Fragment) OS=Puccinia triticina (isolate 1-1 / race 1 (BBBD)) GN=PTTG_06699 PE=3 SV=1;tr|A0A0C4F0S9|A0A0C4F0S9_PUCT1 Uncharacterized protein OS=Puccinia triticina (isolate 1-1 / race 1 (BBBD)) PE=
9		25.9005			2	2	2	5.8	5.8	5.8	58.25	0.0099343	2.4483	765780000	25	tr|A0A0C4EJA7|A0A0C4EJA7_PUCT1;tr|A0A180GUY3|A0A180GUY3_PUCT1	tr|A0A0C4EJA7|A0A0C4EJA7_PUCT1;tr|A0A180GUY3|A0A180GUY3_PUCT1	tr|A0A0C4EJA7|A0A0C4EJA7_PUCT1 Uncharacterized protein OS=Puccinia triticina (isolate 1-1 / race 1 (BBBD)) PE=4 SV=1;tr|A0A180GUY3|A0A180GUY3_PUCT1 Uncharacterized protein (Fragment) OS=Puccinia triticina (isolate 1-1 / race 1 (BBBD)) GN=PTTG_00825 PE=4 SV
10	26.3012	26.506	25.3297	24.8071	2	2	2	2.1	2.1	2.1	106.18	0.0046964	2.9528	731640000	18	W5G157;REV__tr|A0A0C4ERZ9|A0A0C4ERZ9_PUCT1;REV__tr|A0A180G1I7|A0A180G1I7_PUCT1;W5FE90;REV__A0A1D6D8E2	W5G157;REV__tr|A0A0C4ERZ9|A0A0C4ERZ9_PUCT1;REV__tr|A0A180G1I7|A0A180G1I7_PUCT1;W5FE90;REV__A0A1D6D8E2	tr|W5G157|W5G157_WHEAT Uncharacterized protein OS=Triticum aestivum PE=4 SV=1;tr|A0A0C4ERZ9|A0A0C4ERZ9_PUCT1 Uncharacterized protein OS=Puccinia triticina (isolate 1-1 / race 1 (BBBD)) GN=PTTG_03569 PE=4 SV=1;tr|A0A180G1I7|A0A180G1I7_PUCT1 Uncharacterized
19	29.2561				1	1	1	2.1	2.1	2.1	43.701	0.0043952	3.0075	332860000	30	tr|A0A0C4EYI8|A0A0C4EYI8_PUCT1;tr|A0A180GXR5|A0A180GXR5_PUCT1	tr|A0A0C4EYI8|A0A0C4EYI8_PUCT1;tr|A0A180GXR5|A0A180GXR5_PUCT1	tr|A0A0C4EYI8|A0A0C4EYI8_PUCT1 Uncharacterized protein OS=Puccinia triticina (isolate 1-1 / race 1 (BBBD)) PE=3 SV=1;tr|A0A180GXR5|A0A180GXR5_PUCT1 60S ribosomal protein L3 OS=Puccinia triticina (isolate 1-1 / race 1 (BBBD)) GN=PTTG_05888 PE=3 SV=1
25		25.6093			3	3	3	1.6	1.6	1.6	185.49	0.0045491	2.9924	121330000	5	tr|A0A0C4EL12|A0A0C4EL12_PUCT1;tr|A0A180H5U5|A0A180H5U5_PUCT1;A0A1D5YTE9;A0A1D5YTE6;A0A1D5ZGC4;A0A1D5YTF0;A0A1D6SC64;A0A1D6S720;A0A1D5YTE7;A0A1D6SC67;A0A1D6CLY7;W5HZR1;W5H9P0;W5F3Z7	tr|A0A0C4EL12|A0A0C4EL12_PUCT1;tr|A0A180H5U5|A0A180H5U5_PUCT1	tr|A0A0C4EL12|A0A0C4EL12_PUCT1 Uncharacterized protein OS=Puccinia triticina (isolate 1-1 / race 1 (BBBD)) PE=4 SV=1;tr|A0A180H5U5|A0A180H5U5_PUCT1 Uncharacterized protein OS=Puccinia triticina (isolate 1-1 / race 1 (BBBD)) GN=PTTG_01445 PE=4 SV=1
27	26.0811				4	2	1	11.3	8.1	5.2	38.193	0	11.895	97840000	3	tr|A0A180H1U0|A0A180H1U0_PUCT1;tr|A0A0C4ENV7|A0A0C4ENV7_PUCT1;tr|A0A180FZA5|A0A180FZA5_PUCT1	tr|A0A180H1U0|A0A180H1U0_PUCT1;tr|A0A0C4ENV7|A0A0C4ENV7_PUCT1;tr|A0A180FZA5|A0A180FZA5_PUCT1	tr|A0A180H1U0|A0A180H1U0_PUCT1 Tubulin beta chain (Fragment) OS=Puccinia triticina (isolate 1-1 / race 1 (BBBD)) GN=PTTG_02454 PE=3 SV=1;tr|A0A0C4ENV7|A0A0C4ENV7_PUCT1 Tubulin beta chain OS=Puccinia triticina (isolate 1-1 / race 1 (BBBD)) PE=3 SV=1;tr|A0A1
24			24.5139		1	1	1	1.7	1.7	1.7	72.214	0.0015523	3.6376	124330000	9	tr|A0A0C4EWD5|A0A0C4EWD5_PUCT1;tr|A0A180GBQ8|A0A180GBQ8_PUCT1	tr|A0A0C4EWD5|A0A0C4EWD5_PUCT1;tr|A0A180GBQ8|A0A180GBQ8_PUCT1	tr|A0A0C4EWD5|A0A0C4EWD5_PUCT1 Acetyl-coenzyme A synthetase OS=Puccinia triticina (isolate 1-1 / race 1 (BBBD)) PE=3 SV=1;tr|A0A180GBQ8|A0A180GBQ8_PUCT1 Acetyl-coenzyme A synthetase OS=Puccinia triticina (isolate 1-1 / race 1 (BBBD)) GN=PTTG_05130 PE=3 SV=
26			26.0541		3	3	3	10.3	10.3	10.3	46.463	0	7.5456	102530000	7	tr|A0A0C4EI64|A0A0C4EI64_PUCT1;tr|A0A180H402|A0A180H402_PUCT1	tr|A0A0C4EI64|A0A0C4EI64_PUCT1;tr|A0A180H402|A0A180H402_PUCT1	tr|A0A0C4EI64|A0A0C4EI64_PUCT1 Uncharacterized protein OS=Puccinia triticina (isolate 1-1 / race 1 (BBBD)) PE=3 SV=1;tr|A0A180H402|A0A180H402_PUCT1 Enolase OS=Puccinia triticina (isolate 1-1 / race 1 (BBBD)) GN=PTTG_00430 PE=3 SV=1
29			26.3006		2	2	2	37	37	37	8.5913	0	13.17	75036000	4	tr|A0A0C4EIJ7|A0A0C4EIJ7_PUCT1	tr|A0A0C4EIJ7|A0A0C4EIJ7_PUCT1	tr|A0A0C4EIJ7|A0A0C4EIJ7_PUCT1 Uncharacterized protein OS=Puccinia triticina (isolate 1-1 / race 1 (BBBD)) GN=PTTG_25230 PE=4 SV=1
30			25.0908		2	2	2	30.6	30.6	30.6	10.335	0.00036095	4.2111	71237000	5	tr|A0A180H359|A0A180H359_PUCT1	tr|A0A180H359|A0A180H359_PUCT1	tr|A0A180H359|A0A180H359_PUCT1 Uncharacterized protein OS=Puccinia triticina (isolate 1-1 / race 1 (BBBD)) GN=PTTG_25377 PE=4 SV=1
32			26.0084		9	2	2	16.5	5.4	5.4	70.902	0.0080909	2.5995	45883000	2	tr|A0A0C4ERQ8|A0A0C4ERQ8_PUCT1	tr|A0A0C4ERQ8|A0A0C4ERQ8_PUCT1	tr|A0A0C4ERQ8|A0A0C4ERQ8_PUCT1 Heat shock protein HSS1 OS=Puccinia triticina (isolate 1-1 / race 1 (BBBD)) GN=PTTG_03478 PE=3 SV=1
33			25.5612		1	1	1	11.6	11.6	11.6	10.71	0.0026873	3.3302	44725000	1	tr|A0A0C4FCG7|A0A0C4FCG7_PUCT1;tr|A0A0C4ENY3|A0A0C4ENY3_PUCT1;tr|A0A180G1J2|A0A180G1J2_PUCT1	tr|A0A0C4FCG7|A0A0C4FCG7_PUCT1;tr|A0A0C4ENY3|A0A0C4ENY3_PUCT1;tr|A0A180G1J2|A0A180G1J2_PUCT1	tr|A0A0C4FCG7|A0A0C4FCG7_PUCT1 Uncharacterized protein OS=Puccinia triticina (isolate 1-1 / race 1 (BBBD)) PE=4 SV=1;tr|A0A0C4ENY3|A0A0C4ENY3_PUCT1 Uncharacterized protein OS=Puccinia triticina (isolate 1-1 / race 1 (BBBD)) PE=4 SV=1;tr|A0A180G1J2|A0A180G1
34			24.2117		2	2	2	32.4	32.4	32.4	7.379	0.00036232	4.2747	29044000	4	tr|A0A0C4F7Y7|A0A0C4F7Y7_PUCT1	tr|A0A0C4F7Y7|A0A0C4F7Y7_PUCT1	tr|A0A0C4F7Y7|A0A0C4F7Y7_PUCT1 Uncharacterized protein OS=Puccinia triticina (isolate 1-1 / race 1 (BBBD)) GN=PTTG_09273 PE=4 SV=1
35			24.4184		1	1	1	13.4	13.4	13.4	15.494	0.0099282	2.4444	17647000	1	tr|A0A0C4ELT6|A0A0C4ELT6_PUCT1	tr|A0A0C4ELT6|A0A0C4ELT6_PUCT1	tr|A0A0C4ELT6|A0A0C4ELT6_PUCT1 Uncharacterized protein OS=Puccinia triticina (isolate 1-1 / race 1 (BBBD)) GN=PTTG_01723 PE=4 SV=1

## Sheet: 72 h
Black	Th only		153		Table S4: Low abundance Puccinia proteins, see Tab for time-point.
Blue	Both		20
Green	Lr Only		5
Red	Also seen in Ctrl		3
	Average LFQ intensity Rust_Lr1_72_C	Average LFQ intensity Rust_TH_72_C	N: Peptides	N: Razor + unique peptides	N: Unique peptides	N: Sequence coverage [%]	N: Unique + razor sequence coverage [%]	N: Unique sequence coverage [%]	N: Mol. weight [kDa]	N: Q-value	N: Score	N: Intensity	N: MS/MS count	T: Protein IDs	T: Majority protein IDs	T: Fasta headers
		30.0679	23	23	23	50	50	50	61.838	0	87.695	2877500000	42	tr|A0A180GD88|A0A180GD88_PUCT1;tr|A0A0C4EYC7|A0A0C4EYC7_PUCT1	tr|A0A180GD88|A0A180GD88_PUCT1;tr|A0A0C4EYC7|A0A0C4EYC7_PUCT1	tr|A0A180GD88|A0A180GD88_PUCT1 Heat shock protein 60 OS=Puccinia triticina (isolate 1-1 / race 1 (BBBD)) GN=PTTG_05827 PE=3 SV=1;tr|A0A0C4EYC7|A0A0C4EYC7_PUCT1 Uncharacterized protein OS=Puccinia triticina (isolate 1-1 / race 1 (BBBD)) PE=3 SV=1
		29.9453	1	1	1	3	3	3	55.443	0.0071713	2.84	2072700000	1	tr|A0A0C4F2I9|A0A0C4F2I9_PUCT1;tr|A0A180GYF0|A0A180GYF0_PUCT1	tr|A0A0C4F2I9|A0A0C4F2I9_PUCT1;tr|A0A180GYF0|A0A180GYF0_PUCT1	tr|A0A0C4F2I9|A0A0C4F2I9_PUCT1 Uncharacterized protein OS=Puccinia triticina (isolate 1-1 / race 1 (BBBD)) PE=4 SV=1;tr|A0A180GYF0|A0A180GYF0_PUCT1 Uncharacterized protein OS=Puccinia triticina (isolate 1-1 / race 1 (BBBD)) GN=PTTG_07310 PE=4 SV=1
		29.1852	6	6	6	60.8	60.8	60.8	17.91	0	53.06	1550700000	13	tr|A0A180H3P2|A0A180H3P2_PUCT1;tr|A0A0C4EI59|A0A0C4EI59_PUCT1	tr|A0A180H3P2|A0A180H3P2_PUCT1;tr|A0A0C4EI59|A0A0C4EI59_PUCT1	tr|A0A180H3P2|A0A180H3P2_PUCT1 Peptidyl-prolyl cis-trans isomerase OS=Puccinia triticina (isolate 1-1 / race 1 (BBBD)) GN=PTTG_00425 PE=3 SV=1;tr|A0A0C4EI59|A0A0C4EI59_PUCT1 Peptidyl-prolyl cis-trans isomerase OS=Puccinia triticina (isolate 1-1 / race 1 (B
		28.6839	17	15	15	36.9	33	33	68.352	0	196.51	1143500000	25	tr|A0A180H2K3|A0A180H2K3_PUCT1;tr|A0A0C4ELQ9|A0A0C4ELQ9_PUCT1	tr|A0A180H2K3|A0A180H2K3_PUCT1;tr|A0A0C4ELQ9|A0A0C4ELQ9_PUCT1	tr|A0A180H2K3|A0A180H2K3_PUCT1 Heat shock protein SSB OS=Puccinia triticina (isolate 1-1 / race 1 (BBBD)) GN=PTTG_01696 PE=3 SV=1;tr|A0A0C4ELQ9|A0A0C4ELQ9_PUCT1 Uncharacterized protein OS=Puccinia triticina (isolate 1-1 / race 1 (BBBD)) PE=3 SV=1
		28.5806	15	15	15	29.7	29.7	29.7	81.969	0	39.369	932900000	30	tr|A0A180GF72|A0A180GF72_PUCT1;tr|A0A0C4F117|A0A0C4F117_PUCT1	tr|A0A180GF72|A0A180GF72_PUCT1;tr|A0A0C4F117|A0A0C4F117_PUCT1	tr|A0A180GF72|A0A180GF72_PUCT1 Uncharacterized protein (Fragment) OS=Puccinia triticina (isolate 1-1 / race 1 (BBBD)) GN=PTTG_28026 PE=3 SV=1;tr|A0A0C4F117|A0A0C4F117_PUCT1 Uncharacterized protein OS=Puccinia triticina (isolate 1-1 / race 1 (BBBD)) PE=3 SV
		28.3734	7	7	7	31.1	31.1	31.1	31.695	0	43.628	889650000	19	tr|A0A180G7X6|A0A180G7X6_PUCT1;tr|A0A0C4ELX0|A0A0C4ELX0_PUCT1	tr|A0A180G7X6|A0A180G7X6_PUCT1;tr|A0A0C4ELX0|A0A0C4ELX0_PUCT1	tr|A0A180G7X6|A0A180G7X6_PUCT1 40S ribosomal protein S0 OS=Puccinia triticina (isolate 1-1 / race 1 (BBBD)) GN=RPS0 PE=3 SV=1;tr|A0A0C4ELX0|A0A0C4ELX0_PUCT1 40S ribosomal protein S0 OS=Puccinia triticina (isolate 1-1 / race 1 (BBBD)) GN=RPS0 PE=3 SV=1
		28.9204	2	2	2	10.6	10.6	10.6	17.769	0.0017376	3.7373	884790000	3	tr|A0A180GYF6|A0A180GYF6_PUCT1	tr|A0A180GYF6|A0A180GYF6_PUCT1	tr|A0A180GYF6|A0A180GYF6_PUCT1 Uncharacterized protein OS=Puccinia triticina (isolate 1-1 / race 1 (BBBD)) GN=PTTG_12335 PE=4 SV=1
		27.3207	3	3	3	23.6	23.6	23.6	18.876	0	6.3307	760840000	7	tr|A0A180GJJ1|A0A180GJJ1_PUCT1;tr|A0A0C4EMS2|A0A0C4EMS2_PUCT1	tr|A0A180GJJ1|A0A180GJJ1_PUCT1;tr|A0A0C4EMS2|A0A0C4EMS2_PUCT1	tr|A0A180GJJ1|A0A180GJJ1_PUCT1 Uncharacterized protein OS=Puccinia triticina (isolate 1-1 / race 1 (BBBD)) GN=PTTG_27503 PE=4 SV=1;tr|A0A0C4EMS2|A0A0C4EMS2_PUCT1 Uncharacterized protein OS=Puccinia triticina (isolate 1-1 / race 1 (BBBD)) PE=4 SV=1
		27.9836	1	1	1	20.4	20.4	20.4	10.335	0	211.06	741930000	14	tr|A0A180H359|A0A180H359_PUCT1	tr|A0A180H359|A0A180H359_PUCT1	tr|A0A180H359|A0A180H359_PUCT1 Uncharacterized protein OS=Puccinia triticina (isolate 1-1 / race 1 (BBBD)) GN=PTTG_25377 PE=4 SV=1
		28.3151	5	5	5	22.1	22.1	22.1	34.039	0	34.916	725470000	14	tr|A0A0C4EMV0|A0A0C4EMV0_PUCT1	tr|A0A0C4EMV0|A0A0C4EMV0_PUCT1	tr|A0A0C4EMV0|A0A0C4EMV0_PUCT1 Uncharacterized protein OS=Puccinia triticina (isolate 1-1 / race 1 (BBBD)) GN=PTTG_02090 PE=3 SV=1
		27.3491	6	6	6	16.2	16.2	16.2	46.16	0	18.128	681860000	23	tr|A0A0C4F8L8|A0A0C4F8L8_PUCT1;tr|A0A180GZG6|A0A180GZG6_PUCT1	tr|A0A0C4F8L8|A0A0C4F8L8_PUCT1;tr|A0A180GZG6|A0A180GZG6_PUCT1	tr|A0A0C4F8L8|A0A0C4F8L8_PUCT1 Uncharacterized protein OS=Puccinia triticina (isolate 1-1 / race 1 (BBBD)) PE=4 SV=1;tr|A0A180GZG6|A0A180GZG6_PUCT1 Uncharacterized protein OS=Puccinia triticina (isolate 1-1 / race 1 (BBBD)) GN=PTTG_09516 PE=4 SV=1
		27.526	2	2	2	17.2	17.2	17.2	16.569	0	76.137	638260000	15	tr|A0A0C4EM80|A0A0C4EM80_PUCT1	tr|A0A0C4EM80|A0A0C4EM80_PUCT1	tr|A0A0C4EM80|A0A0C4EM80_PUCT1 Nucleoside diphosphate kinase OS=Puccinia triticina (isolate 1-1 / race 1 (BBBD)) GN=PTTG_01869 PE=3 SV=1
		27.7843	8	8	8	42.1	42.1	42.1	38.006	0	91.334	636600000	30	tr|A0A0C4ES78|A0A0C4ES78_PUCT1	tr|A0A0C4ES78|A0A0C4ES78_PUCT1	tr|A0A0C4ES78|A0A0C4ES78_PUCT1 Uncharacterized protein OS=Puccinia triticina (isolate 1-1 / race 1 (BBBD)) GN=PTTG_03652 PE=4 SV=1
		28.0416	8	8	7	26.9	26.9	23.6	45.846	0	22.232	595200000	13	tr|A0A0C4F058|A0A0C4F058_PUCT1;tr|A0A180GH01|A0A180GH01_PUCT1;tr|A0A0C4EID9|A0A0C4EID9_PUCT1	tr|A0A0C4F058|A0A0C4F058_PUCT1;tr|A0A180GH01|A0A180GH01_PUCT1	tr|A0A0C4F058|A0A0C4F058_PUCT1 Uncharacterized protein OS=Puccinia triticina (isolate 1-1 / race 1 (BBBD)) PE=4 SV=1;tr|A0A180GH01|A0A180GH01_PUCT1 Uncharacterized protein OS=Puccinia triticina (isolate 1-1 / race 1 (BBBD)) GN=PTTG_06474 PE=4 SV=1
		29.0053	7	7	7	23.5	23.5	23.5	33.781	0	13.542	573120000	13	tr|A0A0C4ERL0|A0A0C4ERL0_PUCT1;tr|A0A180GUJ4|A0A180GUJ4_PUCT1	tr|A0A0C4ERL0|A0A0C4ERL0_PUCT1;tr|A0A180GUJ4|A0A180GUJ4_PUCT1	tr|A0A0C4ERL0|A0A0C4ERL0_PUCT1 Uncharacterized protein OS=Puccinia triticina (isolate 1-1 / race 1 (BBBD)) PE=4 SV=1;tr|A0A180GUJ4|A0A180GUJ4_PUCT1 Uncharacterized protein OS=Puccinia triticina (isolate 1-1 / race 1 (BBBD)) GN=PTTG_03429 PE=4 SV=1
			1	1	1	3.4	3.4	3.4	31.783	0.0087829	2.698	568390000	12	tr|A0A0C4F0Z4|A0A0C4F0Z4_PUCT1	tr|A0A0C4F0Z4|A0A0C4F0Z4_PUCT1	tr|A0A0C4F0Z4|A0A0C4F0Z4_PUCT1 Uncharacterized protein OS=Puccinia triticina (isolate 1-1 / race 1 (BBBD)) GN=PTTG_06764 PE=4 SV=1
		29.2297	5	5	5	13.8	13.8	13.8	49.906	0	12.854	556380000	5	tr|A0A0C4EZL4|A0A0C4EZL4_PUCT1	tr|A0A0C4EZL4|A0A0C4EZL4_PUCT1	tr|A0A0C4EZL4|A0A0C4EZL4_PUCT1 Uncharacterized protein OS=Puccinia triticina (isolate 1-1 / race 1 (BBBD)) GN=PTTG_06273 PE=4 SV=1
		22.5418	2	2	2	6.7	6.7	6.7	28.539	0.0064113	2.9029	526950000	7	tr|A0A0C4EVJ7|A0A0C4EVJ7_PUCT1;tr|A0A180GSI0|A0A180GSI0_PUCT1	tr|A0A0C4EVJ7|A0A0C4EVJ7_PUCT1;tr|A0A180GSI0|A0A180GSI0_PUCT1	tr|A0A0C4EVJ7|A0A0C4EVJ7_PUCT1 40S ribosomal protein S4 OS=Puccinia triticina (isolate 1-1 / race 1 (BBBD)) PE=3 SV=1;tr|A0A180GSI0|A0A180GSI0_PUCT1 40S ribosomal protein S4 OS=Puccinia triticina (isolate 1-1 / race 1 (BBBD)) GN=PTTG_04832 PE=3 SV=1
		27.1704	11	11	11	25.8	25.8	25.8	69.861	0	23.576	458540000	17	tr|A0A0C4F9B4|A0A0C4F9B4_PUCT1	tr|A0A0C4F9B4|A0A0C4F9B4_PUCT1	tr|A0A0C4F9B4|A0A0C4F9B4_PUCT1 Uncharacterized protein OS=Puccinia triticina (isolate 1-1 / race 1 (BBBD)) GN=PTTG_09784 PE=4 SV=1
		27.4667	12	8	8	18.8	13.2	13.2	80.403	0	23.283	425520000	16	tr|A0A0C4F197|A0A0C4F197_PUCT1;tr|A0A180G5Y9|A0A180G5Y9_PUCT1	tr|A0A0C4F197|A0A0C4F197_PUCT1;tr|A0A180G5Y9|A0A180G5Y9_PUCT1	tr|A0A0C4F197|A0A0C4F197_PUCT1 Uncharacterized protein OS=Puccinia triticina (isolate 1-1 / race 1 (BBBD)) PE=3 SV=1;tr|A0A180G5Y9|A0A180G5Y9_PUCT1 Heat shock protein 90-1 OS=Puccinia triticina (isolate 1-1 / race 1 (BBBD)) GN=PTTG_06867 PE=3 SV=1
		27.3439	9	4	4	20.4	10	10	50.092	0	12.622	398100000	16	tr|A0A180GA96|A0A180GA96_PUCT1;tr|A0A0C4F6S8|A0A0C4F6S8_PUCT1	tr|A0A180GA96|A0A180GA96_PUCT1;tr|A0A0C4F6S8|A0A0C4F6S8_PUCT1	tr|A0A180GA96|A0A180GA96_PUCT1 Elongation factor 1-alpha OS=Puccinia triticina (isolate 1-1 / race 1 (BBBD)) GN=PTTG_08852 PE=3 SV=1;tr|A0A0C4F6S8|A0A0C4F6S8_PUCT1 Uncharacterized protein OS=Puccinia triticina (isolate 1-1 / race 1 (BBBD)) PE=4 SV=1
		27.0938	2	2	2	14.4	14.4	14.4	12.453	0	45.827	397820000	10	tr|A0A180GXF1|A0A180GXF1_PUCT1	tr|A0A180GXF1|A0A180GXF1_PUCT1	tr|A0A180GXF1|A0A180GXF1_PUCT1 Uncharacterized protein OS=Puccinia triticina (isolate 1-1 / race 1 (BBBD)) GN=PTTG_11646 PE=4 SV=1
		26.4983	5	5	5	9	9	9	96.942	0	8.4691	374590000	8	tr|A0A180GBL8|A0A180GBL8_PUCT1;tr|A0A0C4F337|A0A0C4F337_PUCT1	tr|A0A180GBL8|A0A180GBL8_PUCT1;tr|A0A0C4F337|A0A0C4F337_PUCT1	tr|A0A180GBL8|A0A180GBL8_PUCT1 Uncharacterized protein OS=Puccinia triticina (isolate 1-1 / race 1 (BBBD)) GN=PTTG_07511 PE=3 SV=1;tr|A0A0C4F337|A0A0C4F337_PUCT1 Uncharacterized protein OS=Puccinia triticina (isolate 1-1 / race 1 (BBBD)) PE=3 SV=1
		27.8824	2	2	2	11	11	11	25.695	0	7.4279	369600000	5	tr|A0A180GZJ2|A0A180GZJ2_PUCT1	tr|A0A180GZJ2|A0A180GZJ2_PUCT1	tr|A0A180GZJ2|A0A180GZJ2_PUCT1 Uncharacterized protein OS=Puccinia triticina (isolate 1-1 / race 1 (BBBD)) GN=PTTG_03168 PE=4 SV=1
		28.0413	3	3	3	26.4	26.4	26.4	14.882	0.00020088	6.0915	357440000	6	tr|A0A0C4ENQ1|A0A0C4ENQ1_PUCT1	tr|A0A0C4ENQ1|A0A0C4ENQ1_PUCT1	tr|A0A0C4ENQ1|A0A0C4ENQ1_PUCT1 Uncharacterized protein OS=Puccinia triticina (isolate 1-1 / race 1 (BBBD)) GN=PTTG_02398 PE=4 SV=1
		27.0945	5	5	5	49.1	49.1	49.1	12.341	0	6.9246	352090000	7	tr|A0A0C4EYC6|A0A0C4EYC6_PUCT1;tr|A0A180GE00|A0A180GE00_PUCT1	tr|A0A0C4EYC6|A0A0C4EYC6_PUCT1;tr|A0A180GE00|A0A180GE00_PUCT1	tr|A0A0C4EYC6|A0A0C4EYC6_PUCT1 Uncharacterized protein OS=Puccinia triticina (isolate 1-1 / race 1 (BBBD)) PE=3 SV=1;tr|A0A180GE00|A0A180GE00_PUCT1 Uncharacterized protein (Fragment) OS=Puccinia triticina (isolate 1-1 / race 1 (BBBD)) GN=PTTG_05826 PE=3 SV
		26.0967	5	5	5	38	38	38	18.505	0	16.885	348250000	13	tr|A0A0C4F869|A0A0C4F869_PUCT1	tr|A0A0C4F869|A0A0C4F869_PUCT1	tr|A0A0C4F869|A0A0C4F869_PUCT1 Translationally-controlled tumor protein OS=Puccinia triticina (isolate 1-1 / race 1 (BBBD)) GN=PTTG_09356 PE=3 SV=1
		27.1108	4	4	4	16.7	16.7	16.7	46.969	0	18.474	341780000	14	tr|A0A0C4F5U7|A0A0C4F5U7_PUCT1	tr|A0A0C4F5U7|A0A0C4F5U7_PUCT1	tr|A0A0C4F5U7|A0A0C4F5U7_PUCT1 FK506-binding protein OS=Puccinia triticina (isolate 1-1 / race 1 (BBBD)) GN=PTTG_08501 PE=3 SV=1
		27.4985	6	6	6	35.4	35.4	35.4	33.588	0	21.309	319000000	11	tr|A0A0C4F4L6|A0A0C4F4L6_PUCT1	tr|A0A0C4F4L6|A0A0C4F4L6_PUCT1	tr|A0A0C4F4L6|A0A0C4F4L6_PUCT1 Large subunit ribosomal protein L5e OS=Puccinia triticina (isolate 1-1 / race 1 (BBBD)) GN=PTTG_08056 PE=3 SV=1
		27.1011	5	5	5	34.7	34.7	34.7	16.718	0	10.667	312880000	10	tr|A0A0C4DFJ4|A0A0C4DFJ4_PUCT1	tr|A0A0C4DFJ4|A0A0C4DFJ4_PUCT1	tr|A0A0C4DFJ4|A0A0C4DFJ4_PUCT1 40S ribosomal protein S19-A OS=Puccinia triticina (isolate 1-1 / race 1 (BBBD)) GN=PTTG_05323 PE=4 SV=1
		26.7894	2	2	2	11.2	11.2	11.2	36.796	0	8.942	311110000	4	tr|A0A0C4EIX9|A0A0C4EIX9_PUCT1	tr|A0A0C4EIX9|A0A0C4EIX9_PUCT1	tr|A0A0C4EIX9|A0A0C4EIX9_PUCT1 Uncharacterized protein OS=Puccinia triticina (isolate 1-1 / race 1 (BBBD)) GN=PTTG_00696 PE=4 SV=1
		27.7816	5	5	5	15.8	15.8	15.8	29.309	0	10.989	310260000	8	tr|A0A180GYX2|A0A180GYX2_PUCT1;tr|A0A0C4EHG0|A0A0C4EHG0_PUCT1	tr|A0A180GYX2|A0A180GYX2_PUCT1;tr|A0A0C4EHG0|A0A0C4EHG0_PUCT1	tr|A0A180GYX2|A0A180GYX2_PUCT1 Uncharacterized protein OS=Puccinia triticina (isolate 1-1 / race 1 (BBBD)) GN=PTTG_00176 PE=3 SV=1;tr|A0A0C4EHG0|A0A0C4EHG0_PUCT1 Uncharacterized protein OS=Puccinia triticina (isolate 1-1 / race 1 (BBBD)) PE=3 SV=1
		27.1119	3	3	3	20.6	20.6	20.6	17.825	0	9.3306	297100000	5	tr|A0A0C4EKX2|A0A0C4EKX2_PUCT1	tr|A0A0C4EKX2|A0A0C4EKX2_PUCT1	tr|A0A0C4EKX2|A0A0C4EKX2_PUCT1 40S ribosomal protein S18 OS=Puccinia triticina (isolate 1-1 / race 1 (BBBD)) GN=PTTG_01401 PE=3 SV=1
		27.6788	3	3	3	20.9	20.9	20.9	25.691	0	15.462	288980000	10	tr|A0A180H0M4|A0A180H0M4_PUCT1;tr|A0A0C4EKG2|A0A0C4EKG2_PUCT1	tr|A0A180H0M4|A0A180H0M4_PUCT1;tr|A0A0C4EKG2|A0A0C4EKG2_PUCT1	tr|A0A180H0M4|A0A180H0M4_PUCT1 Uncharacterized protein OS=Puccinia triticina (isolate 1-1 / race 1 (BBBD)) GN=PTTG_01237 PE=4 SV=1;tr|A0A0C4EKG2|A0A0C4EKG2_PUCT1 Uncharacterized protein OS=Puccinia triticina (isolate 1-1 / race 1 (BBBD)) PE=4 SV=1
		24.1204	2	2	2	6.2	6.2	6.2	43.701	0.00038358	5.1925	283670000	37	tr|A0A0C4EYI8|A0A0C4EYI8_PUCT1;tr|A0A180GXR5|A0A180GXR5_PUCT1;tr|A0A0C4FCF4|A0A0C4FCF4_PUCT1	tr|A0A0C4EYI8|A0A0C4EYI8_PUCT1;tr|A0A180GXR5|A0A180GXR5_PUCT1;tr|A0A0C4FCF4|A0A0C4FCF4_PUCT1	tr|A0A0C4EYI8|A0A0C4EYI8_PUCT1 Uncharacterized protein OS=Puccinia triticina (isolate 1-1 / race 1 (BBBD)) PE=3 SV=1;tr|A0A180GXR5|A0A180GXR5_PUCT1 60S ribosomal protein L3 OS=Puccinia triticina (isolate 1-1 / race 1 (BBBD)) GN=PTTG_05888 PE=3 SV=1;tr|A0A0
		26.2324	5	5	5	11.3	11.3	11.3	68.734	0	12.949	273110000	12	tr|A0A0C4ERK3|A0A0C4ERK3_PUCT1;tr|A0A180G4K2|A0A180G4K2_PUCT1;tr|A0A0C4EHG7|A0A0C4EHG7_PUCT1	tr|A0A0C4ERK3|A0A0C4ERK3_PUCT1;tr|A0A180G4K2|A0A180G4K2_PUCT1;tr|A0A0C4EHG7|A0A0C4EHG7_PUCT1	tr|A0A0C4ERK3|A0A0C4ERK3_PUCT1 6-phosphogluconate dehydrogenase, decarboxylating OS=Puccinia triticina (isolate 1-1 / race 1 (BBBD)) GN=PTTG_03422 PE=3 SV=1;tr|A0A180G4K2|A0A180G4K2_PUCT1 6-phosphogluconate dehydrogenase, decarboxylating OS=Puccinia tritic
		26.7553	9	9	9	24.4	24.4	24.4	58.415	0	37.997	269030000	12	tr|A0A180H194|A0A180H194_PUCT1;tr|A0A0C4EM38|A0A0C4EM38_PUCT1	tr|A0A180H194|A0A180H194_PUCT1;tr|A0A0C4EM38|A0A0C4EM38_PUCT1	tr|A0A180H194|A0A180H194_PUCT1 Uncharacterized protein OS=Puccinia triticina (isolate 1-1 / race 1 (BBBD)) GN=PTTG_01827 PE=4 SV=1;tr|A0A0C4EM38|A0A0C4EM38_PUCT1 Uncharacterized protein OS=Puccinia triticina (isolate 1-1 / race 1 (BBBD)) PE=4 SV=1
		26.7592	2	2	2	11.1	11.1	11.1	25.98	0	6.7574	258160000	7	tr|A0A0C4ENM5|A0A0C4ENM5_PUCT1	tr|A0A0C4ENM5|A0A0C4ENM5_PUCT1	tr|A0A0C4ENM5|A0A0C4ENM5_PUCT1 Uncharacterized protein OS=Puccinia triticina (isolate 1-1 / race 1 (BBBD)) GN=PTTG_02372 PE=4 SV=1
		26.9319	2	2	2	14.4	14.4	14.4	23.664	0	6.4081	250700000	6	tr|A0A0C4EHJ6|A0A0C4EHJ6_PUCT1	tr|A0A0C4EHJ6|A0A0C4EHJ6_PUCT1	tr|A0A0C4EHJ6|A0A0C4EHJ6_PUCT1 Uncharacterized protein OS=Puccinia triticina (isolate 1-1 / race 1 (BBBD)) GN=PTTG_00212 PE=4 SV=1
		27.3613	5	5	5	20.9	20.9	20.9	37.84	0	34.592	250000000	11	tr|A0A0C4ERX5|A0A0C4ERX5_PUCT1	tr|A0A0C4ERX5|A0A0C4ERX5_PUCT1	tr|A0A0C4ERX5|A0A0C4ERX5_PUCT1 Uncharacterized protein OS=Puccinia triticina (isolate 1-1 / race 1 (BBBD)) GN=PTTG_03545 PE=4 SV=1
		24.4827	2	2	2	4.3	4.3	4.3	72.214	0.0054936	2.9812	244700000	10	tr|A0A0C4EWD5|A0A0C4EWD5_PUCT1;tr|A0A180GBQ8|A0A180GBQ8_PUCT1	tr|A0A0C4EWD5|A0A0C4EWD5_PUCT1;tr|A0A180GBQ8|A0A180GBQ8_PUCT1	tr|A0A0C4EWD5|A0A0C4EWD5_PUCT1 Acetyl-coenzyme A synthetase OS=Puccinia triticina (isolate 1-1 / race 1 (BBBD)) PE=3 SV=1;tr|A0A180GBQ8|A0A180GBQ8_PUCT1 Acetyl-coenzyme A synthetase OS=Puccinia triticina (isolate 1-1 / race 1 (BBBD)) GN=PTTG_05130 PE=3 SV=
		27.2919	4	4	4	33.3	33.3	33.3	22.292	0	33.688	242150000	7	tr|A0A180H0N9|A0A180H0N9_PUCT1;tr|A0A0C4DEZ9|A0A0C4DEZ9_PUCT1	tr|A0A180H0N9|A0A180H0N9_PUCT1;tr|A0A0C4DEZ9|A0A0C4DEZ9_PUCT1	tr|A0A180H0N9|A0A180H0N9_PUCT1 Superoxide dismutase OS=Puccinia triticina (isolate 1-1 / race 1 (BBBD)) GN=PTTG_09275 PE=3 SV=1;tr|A0A0C4DEZ9|A0A0C4DEZ9_PUCT1 Superoxide dismutase OS=Puccinia triticina (isolate 1-1 / race 1 (BBBD)) GN=PTTG_09275 PE=3 SV=1
		26.3215	7	7	7	10.2	10.2	10.2	85.149	0	33.011	234000000	16	tr|A0A0C4EP78|A0A0C4EP78_PUCT1	tr|A0A0C4EP78|A0A0C4EP78_PUCT1	tr|A0A0C4EP78|A0A0C4EP78_PUCT1 Aconitate hydratase, mitochondrial OS=Puccinia triticina (isolate 1-1 / race 1 (BBBD)) GN=PTTG_02579 PE=3 SV=1
		23.8718	3	3	3	5.6	5.6	5.6	76.406	0	6.6792	230160000	4	tr|A0A180GYE4|A0A180GYE4_PUCT1;tr|A0A0C4EYJ8|A0A0C4EYJ8_PUCT1	tr|A0A180GYE4|A0A180GYE4_PUCT1	tr|A0A180GYE4|A0A180GYE4_PUCT1 Polyadenylate-binding protein OS=Puccinia triticina (isolate 1-1 / race 1 (BBBD)) GN=PTTG_05898 PE=3 SV=1
		26.8794	9	9	9	42	42	42	35.997	0	18.011	228410000	9	tr|A0A0C4ERU7|A0A0C4ERU7_PUCT1;tr|A0A180GVP8|A0A180GVP8_PUCT1;tr|A0A0C4EWJ4|A0A0C4EWJ4_PUCT1;tr|A0A180GPS3|A0A180GPS3_PUCT1	tr|A0A0C4ERU7|A0A0C4ERU7_PUCT1;tr|A0A180GVP8|A0A180GVP8_PUCT1;tr|A0A0C4EWJ4|A0A0C4EWJ4_PUCT1;tr|A0A180GPS3|A0A180GPS3_PUCT1	tr|A0A0C4ERU7|A0A0C4ERU7_PUCT1 Uncharacterized protein OS=Puccinia triticina (isolate 1-1 / race 1 (BBBD)) PE=4 SV=1;tr|A0A180GVP8|A0A180GVP8_PUCT1 Fructose-bisphosphate aldolase, class II OS=Puccinia triticina (isolate 1-1 / race 1 (BBBD)) GN=PTTG_03517 P
		26.627	5	5	5	28.4	28.4	28.4	25.292	0	18.075	227520000	6	tr|A0A0C4F1S9|A0A0C4F1S9_PUCT1;tr|A0A180G4T9|A0A180G4T9_PUCT1	tr|A0A0C4F1S9|A0A0C4F1S9_PUCT1;tr|A0A180G4T9|A0A180G4T9_PUCT1	tr|A0A0C4F1S9|A0A0C4F1S9_PUCT1 Uncharacterized protein OS=Puccinia triticina (isolate 1-1 / race 1 (BBBD)) PE=4 SV=1;tr|A0A180G4T9|A0A180G4T9_PUCT1 Uncharacterized protein OS=Puccinia triticina (isolate 1-1 / race 1 (BBBD)) GN=PTTG_07050 PE=4 SV=1
		26.3176	7	6	6	19.6	17.3	17.3	58.362	0	18.97	215550000	9	tr|A0A0C4EM51|A0A0C4EM51_PUCT1	tr|A0A0C4EM51|A0A0C4EM51_PUCT1	tr|A0A0C4EM51|A0A0C4EM51_PUCT1 ATP synthase subunit beta OS=Puccinia triticina (isolate 1-1 / race 1 (BBBD)) GN=PTTG_01840 PE=3 SV=1
		26.6259	6	6	6	13.7	13.7	13.7	56.102	0	12.565	214030000	10	tr|A0A0C4EIL9|A0A0C4EIL9_PUCT1;tr|A0A180H3P5|A0A180H3P5_PUCT1	tr|A0A0C4EIL9|A0A0C4EIL9_PUCT1;tr|A0A180H3P5|A0A180H3P5_PUCT1	tr|A0A0C4EIL9|A0A0C4EIL9_PUCT1 Uncharacterized protein OS=Puccinia triticina (isolate 1-1 / race 1 (BBBD)) PE=4 SV=1;tr|A0A180H3P5|A0A180H3P5_PUCT1 Uncharacterized protein OS=Puccinia triticina (isolate 1-1 / race 1 (BBBD)) GN=PTTG_00586 PE=4 SV=1
		27.5953	12	6	5	21.7	11.9	10.5	90.185	0	20.298	213570000	10	tr|A0A0C4ELI9|A0A0C4ELI9_PUCT1;tr|A0A0C4F8Q5|A0A0C4F8Q5_PUCT1	tr|A0A0C4ELI9|A0A0C4ELI9_PUCT1	tr|A0A0C4ELI9|A0A0C4ELI9_PUCT1 Cell division cycle protein 48 OS=Puccinia triticina (isolate 1-1 / race 1 (BBBD)) GN=PTTG_01623 PE=3 SV=1
		26.369	4	3	3	38.4	32.1	32.1	12.236	0.00019539	5.5613	207540000	5	tr|A0A0C4DFI4|A0A0C4DFI4_PUCT1	tr|A0A0C4DFI4|A0A0C4DFI4_PUCT1	tr|A0A0C4DFI4|A0A0C4DFI4_PUCT1 Cytochrome c OS=Puccinia triticina (isolate 1-1 / race 1 (BBBD)) GN=PTTG_03577 PE=3 SV=1
		26.4183	4	4	4	14.7	14.7	14.7	41.238	0	15.081	201900000	8	tr|A0A0C4ENR2|A0A0C4ENR2_PUCT1	tr|A0A0C4ENR2|A0A0C4ENR2_PUCT1	tr|A0A0C4ENR2|A0A0C4ENR2_PUCT1 60S ribosomal protein L4-A OS=Puccinia triticina (isolate 1-1 / race 1 (BBBD)) GN=PTTG_02409 PE=4 SV=1
		26.6523	5	5	5	26.3	26.3	26.3	19.266	0	12.684	199310000	12	tr|A0A180GVV7|A0A180GVV7_PUCT1;tr|A0A0C4DF11|A0A0C4DF11_PUCT1	tr|A0A180GVV7|A0A180GVV7_PUCT1;tr|A0A0C4DF11|A0A0C4DF11_PUCT1	tr|A0A180GVV7|A0A180GVV7_PUCT1 Uncharacterized protein OS=Puccinia triticina (isolate 1-1 / race 1 (BBBD)) GN=PTTG_09847 PE=4 SV=1;tr|A0A0C4DF11|A0A0C4DF11_PUCT1 Uncharacterized protein OS=Puccinia triticina (isolate 1-1 / race 1 (BBBD)) PE=4 SV=1
		25.7835	8	8	8	16.1	16.1	16.1	83.639	0	19.606	194710000	14	tr|A0A180G6E5|A0A180G6E5_PUCT1;tr|A0A0C4F9A0|A0A0C4F9A0_PUCT1;tr|A0A0C4F489|A0A0C4F489_PUCT1	tr|A0A180G6E5|A0A180G6E5_PUCT1;tr|A0A0C4F9A0|A0A0C4F9A0_PUCT1	tr|A0A180G6E5|A0A180G6E5_PUCT1 Uncharacterized protein OS=Puccinia triticina (isolate 1-1 / race 1 (BBBD)) GN=PTTG_29181 PE=3 SV=1;tr|A0A0C4F9A0|A0A0C4F9A0_PUCT1 Uncharacterized protein OS=Puccinia triticina (isolate 1-1 / race 1 (BBBD)) PE=4 SV=1
		25.8792	4	3	3	33.3	27.9	27.9	17.639	0	16.375	188410000	6	tr|A0A0C4EI22|A0A0C4EI22_PUCT1	tr|A0A0C4EI22|A0A0C4EI22_PUCT1	tr|A0A0C4EI22|A0A0C4EI22_PUCT1 60S ribosomal protein L12 OS=Puccinia triticina (isolate 1-1 / race 1 (BBBD)) GN=PTTG_00388 PE=3 SV=1
		26.7982	4	3	3	29.9	24.4	24.4	13.879	0	7.8683	166310000	11	tr|A0A180GH43|A0A180GH43_PUCT1	tr|A0A180GH43|A0A180GH43_PUCT1	tr|A0A180GH43|A0A180GH43_PUCT1 Uncharacterized protein OS=Puccinia triticina (isolate 1-1 / race 1 (BBBD)) GN=PTTG_27844 PE=4 SV=1
		25.7134	3	3	3	19.1	19.1	19.1	23.91	0	33.533	162110000	7	tr|A0A0C4ERS9|A0A0C4ERS9_PUCT1;tr|A0A180GVL7|A0A180GVL7_PUCT1;tr|A0A0C4F9W0|A0A0C4F9W0_PUCT1;tr|A0A180FZ47|A0A180FZ47_PUCT1	tr|A0A0C4ERS9|A0A0C4ERS9_PUCT1;tr|A0A180GVL7|A0A180GVL7_PUCT1;tr|A0A0C4F9W0|A0A0C4F9W0_PUCT1;tr|A0A180FZ47|A0A180FZ47_PUCT1	tr|A0A0C4ERS9|A0A0C4ERS9_PUCT1 Uncharacterized protein OS=Puccinia triticina (isolate 1-1 / race 1 (BBBD)) PE=3 SV=1;tr|A0A180GVL7|A0A180GVL7_PUCT1 Uncharacterized protein OS=Puccinia triticina (isolate 1-1 / race 1 (BBBD)) GN=PTTG_03499 PE=3 SV=1;tr|A0A0C
		26.8877	5	5	5	16	16	16	46.937	0	11.42	157290000	10	tr|A0A0C4F7Z5|A0A0C4F7Z5_PUCT1;tr|A0A180GM64|A0A180GM64_PUCT1	tr|A0A0C4F7Z5|A0A0C4F7Z5_PUCT1;tr|A0A180GM64|A0A180GM64_PUCT1	tr|A0A0C4F7Z5|A0A0C4F7Z5_PUCT1 Uncharacterized protein OS=Puccinia triticina (isolate 1-1 / race 1 (BBBD)) PE=3 SV=1;tr|A0A180GM64|A0A180GM64_PUCT1 Uncharacterized protein OS=Puccinia triticina (isolate 1-1 / race 1 (BBBD)) GN=PTTG_09282 PE=3 SV=1
		27.176	5	4	4	17.7	15.6	15.6	35.546	0	8.3351	154020000	5	tr|A0A0C4F596|A0A0C4F596_PUCT1;tr|A0A180GST9|A0A180GST9_PUCT1;tr|A0A180GV89|A0A180GV89_PUCT1	tr|A0A0C4F596|A0A0C4F596_PUCT1;tr|A0A180GST9|A0A180GST9_PUCT1	tr|A0A0C4F596|A0A0C4F596_PUCT1 Glyceraldehyde-3-phosphate dehydrogenase OS=Puccinia triticina (isolate 1-1 / race 1 (BBBD)) PE=3 SV=1;tr|A0A180GST9|A0A180GST9_PUCT1 Glyceraldehyde-3-phosphate dehydrogenase OS=Puccinia triticina (isolate 1-1 / race 1 (BBBD)
		25.7516	6	6	6	10.8	10.8	10.8	84.231	0	12.312	150120000	11	tr|A0A180GIJ7|A0A180GIJ7_PUCT1;tr|A0A180GHN9|A0A180GHN9_PUCT1;tr|A0A0C4EKV4|A0A0C4EKV4_PUCT1	tr|A0A180GIJ7|A0A180GIJ7_PUCT1;tr|A0A180GHN9|A0A180GHN9_PUCT1;tr|A0A0C4EKV4|A0A0C4EKV4_PUCT1	tr|A0A180GIJ7|A0A180GIJ7_PUCT1 Uncharacterized protein OS=Puccinia triticina (isolate 1-1 / race 1 (BBBD)) GN=PTTG_27677 PE=4 SV=1;tr|A0A180GHN9|A0A180GHN9_PUCT1 Uncharacterized protein OS=Puccinia triticina (isolate 1-1 / race 1 (BBBD)) GN=PTTG_27677 PE=4
		27.0905	2	2	2	14.7	14.7	14.7	26.3	0.000379	4.9763	148660000	5	tr|A0A180GYG9|A0A180GYG9_PUCT1	tr|A0A180GYG9|A0A180GYG9_PUCT1	tr|A0A180GYG9|A0A180GYG9_PUCT1 Uncharacterized protein OS=Puccinia triticina (isolate 1-1 / race 1 (BBBD)) GN=PTTG_12008 PE=4 SV=1
		26.6174	5	4	4	26	23.4	23.4	29.312	0	8.2449	142710000	5	tr|A0A0C4EIX2|A0A0C4EIX2_PUCT1	tr|A0A0C4EIX2|A0A0C4EIX2_PUCT1	tr|A0A0C4EIX2|A0A0C4EIX2_PUCT1 40S ribosomal protein S3 OS=Puccinia triticina (isolate 1-1 / race 1 (BBBD)) GN=PTTG_00689 PE=4 SV=1
		25.9871	4	4	4	8.3	8.3	8.3	67.686	0	9.6952	133020000	8	tr|A0A180GW97|A0A180GW97_PUCT1;tr|A0A0C4F0K9|A0A0C4F0K9_PUCT1	tr|A0A180GW97|A0A180GW97_PUCT1;tr|A0A0C4F0K9|A0A0C4F0K9_PUCT1	tr|A0A180GW97|A0A180GW97_PUCT1 Uncharacterized protein OS=Puccinia triticina (isolate 1-1 / race 1 (BBBD)) GN=PTTG_06626 PE=4 SV=1;tr|A0A0C4F0K9|A0A0C4F0K9_PUCT1 Uncharacterized protein OS=Puccinia triticina (isolate 1-1 / race 1 (BBBD)) PE=4 SV=1
		26.4539	4	4	4	9.3	9.3	9.3	34.312	0.00019782	5.7923	129560000	5	tr|A0A0C4EXF1|A0A0C4EXF1_PUCT1;tr|A0A180GQ89|A0A180GQ89_PUCT1	tr|A0A0C4EXF1|A0A0C4EXF1_PUCT1;tr|A0A180GQ89|A0A180GQ89_PUCT1	tr|A0A0C4EXF1|A0A0C4EXF1_PUCT1 Uncharacterized protein OS=Puccinia triticina (isolate 1-1 / race 1 (BBBD)) PE=4 SV=1;tr|A0A180GQ89|A0A180GQ89_PUCT1 Uncharacterized protein OS=Puccinia triticina (isolate 1-1 / race 1 (BBBD)) GN=PTTG_05499 PE=4 SV=1
		26.0706	3	3	3	13.7	13.7	13.7	30.023	0.00054446	4.3031	125270000	4	tr|A0A0C4ERD6|A0A0C4ERD6_PUCT1	tr|A0A0C4ERD6|A0A0C4ERD6_PUCT1	tr|A0A0C4ERD6|A0A0C4ERD6_PUCT1 Large subunit ribosomal protein L7Ae OS=Puccinia triticina (isolate 1-1 / race 1 (BBBD)) GN=PTTG_03354 PE=4 SV=1
		26.1492	6	6	6	30.1	30.1	30.1	29.96	0.00020182	6.1799	121850000	7	tr|A0A180GR64|A0A180GR64_PUCT1;tr|A0A0C4EX69|A0A0C4EX69_PUCT1;tr|A0A180GS16|A0A180GS16_PUCT1	tr|A0A180GR64|A0A180GR64_PUCT1;tr|A0A0C4EX69|A0A0C4EX69_PUCT1;tr|A0A180GS16|A0A180GS16_PUCT1	tr|A0A180GR64|A0A180GR64_PUCT1 Uncharacterized protein OS=Puccinia triticina (isolate 1-1 / race 1 (BBBD)) GN=PTTG_05417 PE=4 SV=1;tr|A0A0C4EX69|A0A0C4EX69_PUCT1 Uncharacterized protein OS=Puccinia triticina (isolate 1-1 / race 1 (BBBD)) PE=4 SV=1;tr|A0A18
		25.968	2	2	2	7.7	7.7	7.7	33.282	0	32.623	120360000	5	tr|A0A180GC38|A0A180GC38_PUCT1;tr|A0A0C4ER72|A0A0C4ER72_PUCT1	tr|A0A180GC38|A0A180GC38_PUCT1;tr|A0A0C4ER72|A0A0C4ER72_PUCT1	tr|A0A180GC38|A0A180GC38_PUCT1 60S acidic ribosomal protein P0 OS=Puccinia triticina (isolate 1-1 / race 1 (BBBD)) GN=PTTG_03284 PE=3 SV=1;tr|A0A0C4ER72|A0A0C4ER72_PUCT1 60S acidic ribosomal protein P0 OS=Puccinia triticina (isolate 1-1 / race 1 (BBBD)) PE
		26.4323	3	3	3	11.2	11.2	11.2	35.732	0	6.4665	113820000	6	tr|A0A0C4F2N4|A0A0C4F2N4_PUCT1	tr|A0A0C4F2N4|A0A0C4F2N4_PUCT1	tr|A0A0C4F2N4|A0A0C4F2N4_PUCT1 Succinate--CoA ligase [ADP-forming] subunit alpha, mitochondrial OS=Puccinia triticina (isolate 1-1 / race 1 (BBBD)) GN=PTTG_07355 PE=3 SV=1
		26.4511	4	4	4	18.8	18.8	18.8	35.768	0	7.2942	113330000	4	tr|A0A180GE43|A0A180GE43_PUCT1;tr|A0A0C4EW47|A0A0C4EW47_PUCT1;tr|A0A0C4EW46|A0A0C4EW46_PUCT1	tr|A0A180GE43|A0A180GE43_PUCT1;tr|A0A0C4EW47|A0A0C4EW47_PUCT1	tr|A0A180GE43|A0A180GE43_PUCT1 Thiamine thiazole synthase OS=Puccinia triticina (isolate 1-1 / race 1 (BBBD)) GN=PTTG_28269 PE=3 SV=1;tr|A0A0C4EW47|A0A0C4EW47_PUCT1 Uncharacterized protein OS=Puccinia triticina (isolate 1-1 / race 1 (BBBD)) PE=4 SV=1
		25.6079	6	5	5	11.5	10.3	10.3	73.625	0	11.435	112960000	5	tr|A0A0C4EK03|A0A0C4EK03_PUCT1	tr|A0A0C4EK03|A0A0C4EK03_PUCT1	tr|A0A0C4EK03|A0A0C4EK03_PUCT1 Hsp70-like protein OS=Puccinia triticina (isolate 1-1 / race 1 (BBBD)) GN=PTTG_01076 PE=3 SV=1
		24.6493	7	7	7	23.4	23.4	23.4	40.564	0	10.069	107030000	11	tr|A0A0C4F0Y7|A0A0C4F0Y7_PUCT1;tr|A0A180H2N2|A0A180H2N2_PUCT1;tr|A0A180GM11|A0A180GM11_PUCT1;tr|A0A0C4ELL0|A0A0C4ELL0_PUCT1	tr|A0A0C4F0Y7|A0A0C4F0Y7_PUCT1;tr|A0A180H2N2|A0A180H2N2_PUCT1	tr|A0A0C4F0Y7|A0A0C4F0Y7_PUCT1 Phospho-2-dehydro-3-deoxyheptonate aldolase OS=Puccinia triticina (isolate 1-1 / race 1 (BBBD)) PE=3 SV=1;tr|A0A180H2N2|A0A180H2N2_PUCT1 Uncharacterized protein OS=Puccinia triticina (isolate 1-1 / race 1 (BBBD)) GN=PTTG_0675
		26.2201	3	3	3	19.6	19.6	19.6	36.391	0	6.3897	103050000	7	tr|A0A0C4F1H2|A0A0C4F1H2_PUCT1	tr|A0A0C4F1H2|A0A0C4F1H2_PUCT1	tr|A0A0C4F1H2|A0A0C4F1H2_PUCT1 Uncharacterized protein OS=Puccinia triticina (isolate 1-1 / race 1 (BBBD)) GN=PTTG_06943 PE=4 SV=1
		25.3011	3	3	3	14.3	14.3	14.3	22.566	0.00038256	5.1434	99339000	8	tr|A0A0C4DF71|A0A0C4DF71_PUCT1;tr|A0A0C4ERM5|A0A0C4ERM5_PUCT1	tr|A0A0C4DF71|A0A0C4DF71_PUCT1	tr|A0A0C4DF71|A0A0C4DF71_PUCT1 40S ribosomal protein S7 OS=Puccinia triticina (isolate 1-1 / race 1 (BBBD)) GN=PTTG_03711 PE=4 SV=1
		23.8407	1	1	1	8.5	8.5	8.5	18.987	0	8.6486	96277000	4	tr|A0A0C4F0G9|A0A0C4F0G9_PUCT1;tr|A0A180G360|A0A180G360_PUCT1	tr|A0A0C4F0G9|A0A0C4F0G9_PUCT1;tr|A0A180G360|A0A180G360_PUCT1	tr|A0A0C4F0G9|A0A0C4F0G9_PUCT1 Uncharacterized protein OS=Puccinia triticina (isolate 1-1 / race 1 (BBBD)) PE=3 SV=1;tr|A0A180G360|A0A180G360_PUCT1 60S ribosomal protein L11 OS=Puccinia triticina (isolate 1-1 / race 1 (BBBD)) GN=PTTG_06586 PE=3 SV=1
		26.0272	4	4	4	5.2	5.2	5.2	99.355	0	7.6259	95529000	4	tr|A0A0C4EV63|A0A0C4EV63_PUCT1;tr|A0A180GFE5|A0A180GFE5_PUCT1	tr|A0A0C4EV63|A0A0C4EV63_PUCT1;tr|A0A180GFE5|A0A180GFE5_PUCT1	tr|A0A0C4EV63|A0A0C4EV63_PUCT1 Aminopeptidase OS=Puccinia triticina (isolate 1-1 / race 1 (BBBD)) PE=3 SV=1;tr|A0A180GFE5|A0A180GFE5_PUCT1 Aminopeptidase OS=Puccinia triticina (isolate 1-1 / race 1 (BBBD)) GN=PTTG_04695 PE=3 SV=1
		22.2475	2	2	2	8.2	8.2	8.2	29.518	0.00020004	6.0094	95184000	3	tr|A0A0C4F018|A0A0C4F018_PUCT1	tr|A0A0C4F018|A0A0C4F018_PUCT1	tr|A0A0C4F018|A0A0C4F018_PUCT1 Uncharacterized protein OS=Puccinia triticina (isolate 1-1 / race 1 (BBBD)) GN=PTTG_06434 PE=4 SV=1
		26.1005	5	5	5	12.8	12.8	12.8	57.623	0	10.881	94939000	9	tr|A0A180GC17|A0A180GC17_PUCT1;tr|A0A0C4F5G1|A0A0C4F5G1_PUCT1	tr|A0A180GC17|A0A180GC17_PUCT1;tr|A0A0C4F5G1|A0A0C4F5G1_PUCT1	tr|A0A180GC17|A0A180GC17_PUCT1 Pyruvate kinase OS=Puccinia triticina (isolate 1-1 / race 1 (BBBD)) GN=PTTG_08360 PE=3 SV=1;tr|A0A0C4F5G1|A0A0C4F5G1_PUCT1 Pyruvate kinase OS=Puccinia triticina (isolate 1-1 / race 1 (BBBD)) PE=3 SV=1
		25.6963	4	2	2	28.5	16.5	16.5	17.731	0.00037306	4.7116	94876000	2	tr|A0A180GHK7|A0A180GHK7_PUCT1	tr|A0A180GHK7|A0A180GHK7_PUCT1	tr|A0A180GHK7|A0A180GHK7_PUCT1 60S ribosomal protein L25 OS=Puccinia triticina (isolate 1-1 / race 1 (BBBD)) GN=PTTG_27852 PE=3 SV=1
		25.6047	3	3	3	16.2	16.2	16.2	28.82	0	7.8431	92853000	4	tr|A0A180GPE4|A0A180GPE4_PUCT1;tr|A0A0C4F1A3|A0A0C4F1A3_PUCT1	tr|A0A180GPE4|A0A180GPE4_PUCT1;tr|A0A0C4F1A3|A0A0C4F1A3_PUCT1	tr|A0A180GPE4|A0A180GPE4_PUCT1 Small subunit ribosomal protein S2e OS=Puccinia triticina (isolate 1-1 / race 1 (BBBD)) GN=PTTG_06873 PE=3 SV=1;tr|A0A0C4F1A3|A0A0C4F1A3_PUCT1 Uncharacterized protein OS=Puccinia triticina (isolate 1-1 / race 1 (BBBD)) PE=3 S
		25.9266	4	4	4	19.1	19.1	19.1	24.838	0.00019627	5.6574	92216000	5	tr|A0A0C4EKX5|A0A0C4EKX5_PUCT1	tr|A0A0C4EKX5|A0A0C4EKX5_PUCT1	tr|A0A0C4EKX5|A0A0C4EKX5_PUCT1 60S ribosomal protein L10 OS=Puccinia triticina (isolate 1-1 / race 1 (BBBD)) GN=PTTG_01404 PE=4 SV=1
		26.8534	2	2	2	6.3	6.3	6.3	66.43	0	8.4631	92083000	3	tr|A0A0C4EKE7|A0A0C4EKE7_PUCT1	tr|A0A0C4EKE7|A0A0C4EKE7_PUCT1	tr|A0A0C4EKE7|A0A0C4EKE7_PUCT1 Uncharacterized protein OS=Puccinia triticina (isolate 1-1 / race 1 (BBBD)) GN=PTTG_01222 PE=3 SV=1
		25.9699	3	3	3	7.8	7.8	7.8	52.487	0.00019928	5.9284	86677000	4	tr|A0A180GYX1|A0A180GYX1_PUCT1;tr|A0A0C4EK35|A0A0C4EK35_PUCT1	tr|A0A180GYX1|A0A180GYX1_PUCT1	tr|A0A180GYX1|A0A180GYX1_PUCT1 Uncharacterized protein OS=Puccinia triticina (isolate 1-1 / race 1 (BBBD)) GN=PTTG_01108 PE=4 SV=1
		26.1233	2	2	2	6.5	6.5	6.5	37.53	0	6.949	80825000	3	tr|A0A0C4EWK6|A0A0C4EWK6_PUCT1;tr|A0A0C4EKH7|A0A0C4EKH7_PUCT1	tr|A0A0C4EWK6|A0A0C4EWK6_PUCT1;tr|A0A0C4EKH7|A0A0C4EKH7_PUCT1	tr|A0A0C4EWK6|A0A0C4EWK6_PUCT1 Protein NMT1 OS=Puccinia triticina (isolate 1-1 / race 1 (BBBD)) GN=PTTG_05201 PE=4 SV=1;tr|A0A0C4EKH7|A0A0C4EKH7_PUCT1 Protein NMT1 OS=Puccinia triticina (isolate 1-1 / race 1 (BBBD)) GN=PTTG_01252 PE=4 SV=1
		24.2757	4	3	2	17.8	14.2	8.9	27.06	0.0017352	3.7221	80496000	3	tr|A0A180H4G4|A0A180H4G4_PUCT1	tr|A0A180H4G4|A0A180H4G4_PUCT1	tr|A0A180H4G4|A0A180H4G4_PUCT1 Proteasome subunit alpha type OS=Puccinia triticina (isolate 1-1 / race 1 (BBBD)) GN=PTTG_01480 PE=3 SV=1
		24.9901	1	1	1	19.8	19.8	19.8	11.146	0.0003841	5.2069	78546000	2	tr|A0A0C4FA56|A0A0C4FA56_PUCT1;tr|A0A180GZD9|A0A180GZD9_PUCT1	tr|A0A0C4FA56|A0A0C4FA56_PUCT1;tr|A0A180GZD9|A0A180GZD9_PUCT1	tr|A0A0C4FA56|A0A0C4FA56_PUCT1 Uncharacterized protein OS=Puccinia triticina (isolate 1-1 / race 1 (BBBD)) PE=4 SV=1;tr|A0A180GZD9|A0A180GZD9_PUCT1 Uncharacterized protein OS=Puccinia triticina (isolate 1-1 / race 1 (BBBD)) GN=PTTG_10097 PE=4 SV=1
		25.3646	4	4	4	23.2	23.2	23.2	28.816	0	11.08	77883000	7	tr|A0A0C4F9E4|A0A0C4F9E4_PUCT1	tr|A0A0C4F9E4|A0A0C4F9E4_PUCT1	tr|A0A0C4F9E4|A0A0C4F9E4_PUCT1 Uncharacterized protein OS=Puccinia triticina (isolate 1-1 / race 1 (BBBD)) GN=PTTG_09820 PE=4 SV=1
		26.4252	2	2	2	23.4	23.4	23.4	12.214	0.00088652	3.9858	77577000	2	tr|A0A0C4ENT2|A0A0C4ENT2_PUCT1	tr|A0A0C4ENT2|A0A0C4ENT2_PUCT1	tr|A0A0C4ENT2|A0A0C4ENT2_PUCT1 Uncharacterized protein OS=Puccinia triticina (isolate 1-1 / race 1 (BBBD)) GN=PTTG_02429 PE=4 SV=1
		26.4586	2	2	2	18.7	18.7	18.7	14.702	0.0098765	2.5684	73964000	3	tr|A0A180GC84|A0A180GC84_PUCT1	tr|A0A180GC84|A0A180GC84_PUCT1	tr|A0A180GC84|A0A180GC84_PUCT1 Uncharacterized protein OS=Puccinia triticina (isolate 1-1 / race 1 (BBBD)) GN=PTTG_12601 PE=4 SV=1
		25.3151	3	3	3	12	12	12	41.069	0.0033801	3.4206	73717000	2	tr|A0A180GUC2|A0A180GUC2_PUCT1;tr|A0A0C4F6K2|A0A0C4F6K2_PUCT1;tr|A0A0C4EW78|A0A0C4EW78_PUCT1	tr|A0A180GUC2|A0A180GUC2_PUCT1;tr|A0A0C4F6K2|A0A0C4F6K2_PUCT1	tr|A0A180GUC2|A0A180GUC2_PUCT1 Uncharacterized protein OS=Puccinia triticina (isolate 1-1 / race 1 (BBBD)) GN=PTTG_08772 PE=4 SV=1;tr|A0A0C4F6K2|A0A0C4F6K2_PUCT1 Uncharacterized protein OS=Puccinia triticina (isolate 1-1 / race 1 (BBBD)) PE=4 SV=1
		25.5415	1	1	1	6.7	6.7	6.7	27.463	0.0030706	3.5294	72723000	3	tr|A0A0C4F225|A0A0C4F225_PUCT1	tr|A0A0C4F225|A0A0C4F225_PUCT1	tr|A0A0C4F225|A0A0C4F225_PUCT1 60S ribosomal protein L8 OS=Puccinia triticina (isolate 1-1 / race 1 (BBBD)) GN=PTTG_07146 PE=4 SV=1
		23.2348	1	1	1	3.7	3.7	3.7	58.634	0.0041343	3.2235	69563000	2	tr|A0A0C4EPP6|A0A0C4EPP6_PUCT1	tr|A0A0C4EPP6|A0A0C4EPP6_PUCT1	tr|A0A0C4EPP6|A0A0C4EPP6_PUCT1 Uncharacterized protein OS=Puccinia triticina (isolate 1-1 / race 1 (BBBD)) GN=PTTG_02749 PE=4 SV=1
		25.158	2	2	2	13.7	13.7	13.7	21.637	0	6.8437	66922000	2	tr|A0A0C4F3B5|A0A0C4F3B5_PUCT1	tr|A0A0C4F3B5|A0A0C4F3B5_PUCT1	tr|A0A0C4F3B5|A0A0C4F3B5_PUCT1 Uncharacterized protein OS=Puccinia triticina (isolate 1-1 / race 1 (BBBD)) GN=PTTG_07592 PE=4 SV=1
		23.4859	1	1	1	9.5	9.5	9.5	29.956	0	28.212	65032000	6	tr|A0A0C4EZR4|A0A0C4EZR4_PUCT1	tr|A0A0C4EZR4|A0A0C4EZR4_PUCT1	tr|A0A0C4EZR4|A0A0C4EZR4_PUCT1 Uncharacterized protein OS=Puccinia triticina (isolate 1-1 / race 1 (BBBD)) GN=PTTG_06324 PE=4 SV=1
		25.3227	2	2	2	6.7	6.7	6.7	36.184	0.00071378	4.0798	64570000	2	tr|A0A0C4ERX9|A0A0C4ERX9_PUCT1	tr|A0A0C4ERX9|A0A0C4ERX9_PUCT1	tr|A0A0C4ERX9|A0A0C4ERX9_PUCT1 Uncharacterized protein OS=Puccinia triticina (isolate 1-1 / race 1 (BBBD)) GN=PTTG_03549 PE=4 SV=1
		24.9783	4	2	2	24.3	15.1	15.1	16.174	0	6.7221	62916000	3	tr|A0A180GTJ8|A0A180GTJ8_PUCT1;tr|A0A0C4EVJ6|A0A0C4EVJ6_PUCT1	tr|A0A180GTJ8|A0A180GTJ8_PUCT1;tr|A0A0C4EVJ6|A0A0C4EVJ6_PUCT1	tr|A0A180GTJ8|A0A180GTJ8_PUCT1 Small subunit ribosomal protein S14e OS=Puccinia triticina (isolate 1-1 / race 1 (BBBD)) GN=PTTG_04831 PE=3 SV=1;tr|A0A0C4EVJ6|A0A0C4EVJ6_PUCT1 Uncharacterized protein OS=Puccinia triticina (isolate 1-1 / race 1 (BBBD)) PE=3
		24.0077	3	1	1	14.5	6.1	6.1	28.635	0.00037209	4.6798	61685000	5	tr|A0A0C4ERW8|A0A0C4ERW8_PUCT1	tr|A0A0C4ERW8|A0A0C4ERW8_PUCT1	tr|A0A0C4ERW8|A0A0C4ERW8_PUCT1 Proteasome subunit alpha type OS=Puccinia triticina (isolate 1-1 / race 1 (BBBD)) GN=PTTG_03538 PE=3 SV=1
		24.8532	3	3	3	7.9	7.9	7.9	61.446	0.00019489	5.496	61435000	4	tr|A0A180GBB6|A0A180GBB6_PUCT1;tr|A0A0C4ERD8|A0A0C4ERD8_PUCT1	tr|A0A180GBB6|A0A180GBB6_PUCT1;tr|A0A0C4ERD8|A0A0C4ERD8_PUCT1	tr|A0A180GBB6|A0A180GBB6_PUCT1 Glucose-6-phosphate isomerase OS=Puccinia triticina (isolate 1-1 / race 1 (BBBD)) GN=PTTG_03356 PE=3 SV=1;tr|A0A0C4ERD8|A0A0C4ERD8_PUCT1 Glucose-6-phosphate isomerase OS=Puccinia triticina (isolate 1-1 / race 1 (BBBD)) PE=3 S
		25.4464	2	2	2	15.9	15.9	15.9	17.114	0.0035247	3.3633	61375000	2	tr|A0A0C4EUE7|A0A0C4EUE7_PUCT1	tr|A0A0C4EUE7|A0A0C4EUE7_PUCT1	tr|A0A0C4EUE7|A0A0C4EUE7_PUCT1 40S ribosomal protein S13 OS=Puccinia triticina (isolate 1-1 / race 1 (BBBD)) GN=PTTG_04426 PE=3 SV=1
		24.2189	1	1	1	7.5	7.5	7.5	20.097	0.0087816	2.6976	57702000	4	tr|A0A0C4EJ23|A0A0C4EJ23_PUCT1	tr|A0A0C4EJ23|A0A0C4EJ23_PUCT1	tr|A0A0C4EJ23|A0A0C4EJ23_PUCT1 Copper/zinc superoxide dismutase OS=Puccinia triticina (isolate 1-1 / race 1 (BBBD)) GN=PTTG_00740 PE=4 SV=1
		24.7705	3	2	2	16.3	11.9	11.9	22.221	0.0055105	3.009	56636000	2	tr|A0A0C4EMY9|A0A0C4EMY9_PUCT1;tr|A0A180GTH7|A0A180GTH7_PUCT1;tr|A0A180GPF2|A0A180GPF2_PUCT1;tr|A0A0C4EHA7|A0A0C4EHA7_PUCT1	tr|A0A0C4EMY9|A0A0C4EMY9_PUCT1;tr|A0A180GTH7|A0A180GTH7_PUCT1;tr|A0A180GPF2|A0A180GPF2_PUCT1;tr|A0A0C4EHA7|A0A0C4EHA7_PUCT1	tr|A0A0C4EMY9|A0A0C4EMY9_PUCT1 Uncharacterized protein OS=Puccinia triticina (isolate 1-1 / race 1 (BBBD)) PE=3 SV=1;tr|A0A180GTH7|A0A180GTH7_PUCT1 40S ribosomal protein S5 OS=Puccinia triticina (isolate 1-1 / race 1 (BBBD)) GN=PTTG_02129 PE=3 SV=1;tr|A0A1
		24.7958	2	2	2	5.5	5.5	5.5	57.498	0.0008881	4.0082	56490000	2	tr|A0A180G405|A0A180G405_PUCT1;tr|A0A0C4F963|A0A0C4F963_PUCT1	tr|A0A180G405|A0A180G405_PUCT1;tr|A0A0C4F963|A0A0C4F963_PUCT1	tr|A0A180G405|A0A180G405_PUCT1 Uncharacterized protein OS=Puccinia triticina (isolate 1-1 / race 1 (BBBD)) GN=PTTG_09731 PE=4 SV=1;tr|A0A0C4F963|A0A0C4F963_PUCT1 Dihydrolipoamide acetyltransferase component of pyruvate dehydrogenase complex OS=Puccinia tri
		24.9109	2	2	2	16.7	16.7	16.7	21.634	0.0017394	3.7465	53753000	2	tr|A0A0C4EYC0|A0A0C4EYC0_PUCT1	tr|A0A0C4EYC0|A0A0C4EYC0_PUCT1	tr|A0A0C4EYC0|A0A0C4EYC0_PUCT1 Large subunit ribosomal protein L9e OS=Puccinia triticina (isolate 1-1 / race 1 (BBBD)) GN=PTTG_05820 PE=4 SV=1
		24.0801	2	2	2	10.9	10.9	10.9	24.363	0.0033772	3.4131	53656000	4	tr|A0A0C4F001|A0A0C4F001_PUCT1;tr|A0A180G6H2|A0A180G6H2_PUCT1	tr|A0A0C4F001|A0A0C4F001_PUCT1;tr|A0A180G6H2|A0A180G6H2_PUCT1	tr|A0A0C4F001|A0A0C4F001_PUCT1 Uncharacterized protein OS=Puccinia triticina (isolate 1-1 / race 1 (BBBD)) PE=4 SV=1;tr|A0A180G6H2|A0A180G6H2_PUCT1 Uncharacterized protein OS=Puccinia triticina (isolate 1-1 / race 1 (BBBD)) GN=PTTG_06415 PE=4 SV=1
		25.4456	3	3	3	10.5	10.5	10.5	43.589	0.0055079	3.0072	52488000	2	tr|A0A180H165|A0A180H165_PUCT1;tr|A0A180H0H3|A0A180H0H3_PUCT1;tr|A0A0C4F210|A0A0C4F210_PUCT1	tr|A0A180H165|A0A180H165_PUCT1;tr|A0A180H0H3|A0A180H0H3_PUCT1;tr|A0A0C4F210|A0A0C4F210_PUCT1	tr|A0A180H165|A0A180H165_PUCT1 Uncharacterized protein OS=Puccinia triticina (isolate 1-1 / race 1 (BBBD)) GN=PTTG_07131 PE=3 SV=1;tr|A0A180H0H3|A0A180H0H3_PUCT1 Uncharacterized protein OS=Puccinia triticina (isolate 1-1 / race 1 (BBBD)) GN=PTTG_07131 PE=3
		25.0453	3	3	3	20	20	20	26.894	0	7.1259	51894000	4	tr|A0A180GVA1|A0A180GVA1_PUCT1;tr|A0A0C4F3J2|A0A0C4F3J2_PUCT1	tr|A0A180GVA1|A0A180GVA1_PUCT1;tr|A0A0C4F3J2|A0A0C4F3J2_PUCT1	tr|A0A180GVA1|A0A180GVA1_PUCT1 Proteasome subunit alpha type OS=Puccinia triticina (isolate 1-1 / race 1 (BBBD)) GN=PTTG_07672 PE=3 SV=1;tr|A0A0C4F3J2|A0A0C4F3J2_PUCT1 Proteasome endopeptidase complex OS=Puccinia triticina (isolate 1-1 / race 1 (BBBD)) PE=
		24.9386	4	4	4	18.8	18.8	18.8	31.44	0	6.6209	49781000	5	tr|A0A0C4ELS5|A0A0C4ELS5_PUCT1	tr|A0A0C4ELS5|A0A0C4ELS5_PUCT1	tr|A0A0C4ELS5|A0A0C4ELS5_PUCT1 Uncharacterized protein OS=Puccinia triticina (isolate 1-1 / race 1 (BBBD)) GN=PTTG_01712 PE=4 SV=1
		24.596	1	1	1	12.7	12.7	12.7	13.558	0.0057943	2.9434	49725000	1	tr|A0A0C4F1V6|A0A0C4F1V6_PUCT1	tr|A0A0C4F1V6|A0A0C4F1V6_PUCT1	tr|A0A0C4F1V6|A0A0C4F1V6_PUCT1 Uncharacterized protein OS=Puccinia triticina (isolate 1-1 / race 1 (BBBD)) GN=PTTG_07077 PE=4 SV=1
		25.3295	1	1	1	13	13	13	12.353	0.00088921	4.0214	49093000	2	tr|A0A0C4ET29|A0A0C4ET29_PUCT1;tr|A0A180GCM9|A0A180GCM9_PUCT1	tr|A0A0C4ET29|A0A0C4ET29_PUCT1;tr|A0A180GCM9|A0A180GCM9_PUCT1	tr|A0A0C4ET29|A0A0C4ET29_PUCT1 Uncharacterized protein OS=Puccinia triticina (isolate 1-1 / race 1 (BBBD)) PE=4 SV=1;tr|A0A180GCM9|A0A180GCM9_PUCT1 Uncharacterized protein (Fragment) OS=Puccinia triticina (isolate 1-1 / race 1 (BBBD)) GN=PTTG_03958 PE=4 SV
		25.1422	2	2	2	8.2	8.2	8.2	26.901	0	6.2053	48929000	5	tr|A0A0C4ELN5|A0A0C4ELN5_PUCT1	tr|A0A0C4ELN5|A0A0C4ELN5_PUCT1	tr|A0A0C4ELN5|A0A0C4ELN5_PUCT1 Uncharacterized protein OS=Puccinia triticina (isolate 1-1 / race 1 (BBBD)) GN=PTTG_01669 PE=4 SV=1
		24.122	3	3	3	23.5	23.5	23.5	16.057	0.00019889	5.9007	48365000	8	tr|A0A0C4F5H5|A0A0C4F5H5_PUCT1	tr|A0A0C4F5H5|A0A0C4F5H5_PUCT1	tr|A0A0C4F5H5|A0A0C4F5H5_PUCT1 Uncharacterized protein OS=Puccinia triticina (isolate 1-1 / race 1 (BBBD)) GN=PTTG_08374 PE=4 SV=1
		24.855	2	2	2	3.5	3.5	3.5	76.896	0.0040027	3.3006	47312000	2	tr|A0A0C4F0J0|A0A0C4F0J0_PUCT1;tr|A0A0C4F8U5|A0A0C4F8U5_PUCT1;tr|A0A180GDP3|A0A180GDP3_PUCT1	tr|A0A0C4F0J0|A0A0C4F0J0_PUCT1;tr|A0A0C4F8U5|A0A0C4F8U5_PUCT1;tr|A0A180GDP3|A0A180GDP3_PUCT1	tr|A0A0C4F0J0|A0A0C4F0J0_PUCT1 Uncharacterized protein OS=Puccinia triticina (isolate 1-1 / race 1 (BBBD)) PE=4 SV=1;tr|A0A0C4F8U5|A0A0C4F8U5_PUCT1 Uncharacterized protein OS=Puccinia triticina (isolate 1-1 / race 1 (BBBD)) PE=4 SV=1;tr|A0A180GDP3|A0A180GD
		25.3591	7	7	7	18.7	18.7	18.7	60.694	0	10.006	46417000	6	tr|A0A0C4EN28|A0A0C4EN28_PUCT1	tr|A0A0C4EN28|A0A0C4EN28_PUCT1	tr|A0A0C4EN28|A0A0C4EN28_PUCT1 Phosphoglucomutase OS=Puccinia triticina (isolate 1-1 / race 1 (BBBD)) GN=PTTG_02168 PE=3 SV=1
		23.7527	4	4	4	13.9	13.9	13.9	46.851	0	8.3535	45915000	6	tr|A0A0C4F538|A0A0C4F538_PUCT1;tr|A0A0C4EMF5|A0A0C4EMF5_PUCT1;tr|A0A180GFV9|A0A180GFV9_PUCT1;tr|A0A180GCE1|A0A180GCE1_PUCT1;tr|A0A0C4F566|A0A0C4F566_PUCT1;tr|A0A180FZ45|A0A180FZ45_PUCT1;tr|A0A180G8T4|A0A180G8T4_PUCT1	tr|A0A0C4F538|A0A0C4F538_PUCT1;tr|A0A0C4EMF5|A0A0C4EMF5_PUCT1;tr|A0A180GFV9|A0A180GFV9_PUCT1;tr|A0A180GCE1|A0A180GCE1_PUCT1	tr|A0A0C4F538|A0A0C4F538_PUCT1 Uncharacterized protein OS=Puccinia triticina (isolate 1-1 / race 1 (BBBD)) PE=3 SV=1;tr|A0A0C4EMF5|A0A0C4EMF5_PUCT1 Uncharacterized protein OS=Puccinia triticina (isolate 1-1 / race 1 (BBBD)) PE=3 SV=1;tr|A0A180GFV9|A0A180GF
		25.0062	3	2	2	9.9	6.5	6.5	43.823	0.0013986	3.8022	44173000	2	tr|A0A0C4F9L5|A0A0C4F9L5_PUCT1;tr|A0A180H4V3|A0A180H4V3_PUCT1;tr|A0A0C4EID7|A0A0C4EID7_PUCT1;tr|A0A180G2W4|A0A180G2W4_PUCT1	tr|A0A0C4F9L5|A0A0C4F9L5_PUCT1;tr|A0A180H4V3|A0A180H4V3_PUCT1	tr|A0A0C4F9L5|A0A0C4F9L5_PUCT1 Uncharacterized protein OS=Puccinia triticina (isolate 1-1 / race 1 (BBBD)) PE=4 SV=1;tr|A0A180H4V3|A0A180H4V3_PUCT1 Uncharacterized protein OS=Puccinia triticina (isolate 1-1 / race 1 (BBBD)) GN=PTTG_25262 PE=4 SV=1
		24.7783	2	2	2	16.3	16.3	16.3	21.313	0.0005533	4.5447	43908000	5	tr|A0A180GMX7|A0A180GMX7_PUCT1;tr|A0A0C4ELL7|A0A0C4ELL7_PUCT1	tr|A0A180GMX7|A0A180GMX7_PUCT1;tr|A0A0C4ELL7|A0A0C4ELL7_PUCT1	tr|A0A180GMX7|A0A180GMX7_PUCT1 Uncharacterized protein OS=Puccinia triticina (isolate 1-1 / race 1 (BBBD)) GN=PTTG_01651 PE=4 SV=1;tr|A0A0C4ELL7|A0A0C4ELL7_PUCT1 Uncharacterized protein OS=Puccinia triticina (isolate 1-1 / race 1 (BBBD)) PE=4 SV=1
		24.6052	2	2	2	9.5	9.5	9.5	52.252	0.0001952	5.5417	43421000	2	tr|A0A180H246|A0A180H246_PUCT1;tr|A0A0C4EM19|A0A0C4EM19_PUCT1	tr|A0A180H246|A0A180H246_PUCT1;tr|A0A0C4EM19|A0A0C4EM19_PUCT1	tr|A0A180H246|A0A180H246_PUCT1 Argininosuccinate lyase OS=Puccinia triticina (isolate 1-1 / race 1 (BBBD)) GN=PTTG_01808 PE=3 SV=1;tr|A0A0C4EM19|A0A0C4EM19_PUCT1 Uncharacterized protein OS=Puccinia triticina (isolate 1-1 / race 1 (BBBD)) PE=3 SV=1
		24.7565	2	2	2	5.8	5.8	5.8	29.435	0.0017397	3.7474	42521000	2	tr|A0A0C4ERV1|A0A0C4ERV1_PUCT1	tr|A0A0C4ERV1|A0A0C4ERV1_PUCT1	tr|A0A0C4ERV1|A0A0C4ERV1_PUCT1 40S ribosomal protein S1 OS=Puccinia triticina (isolate 1-1 / race 1 (BBBD)) GN=RPS1 PE=3 SV=1
		23.6032	1	1	1	14.9	14.9	14.9	12.431	0.00088778	4.0066	37682000	3	tr|A0A0C4DFJ3|A0A0C4DFJ3_PUCT1	tr|A0A0C4DFJ3|A0A0C4DFJ3_PUCT1	tr|A0A0C4DFJ3|A0A0C4DFJ3_PUCT1 Uncharacterized protein OS=Puccinia triticina (isolate 1-1 / race 1 (BBBD)) GN=PTTG_08898 PE=3 SV=1
		24.5793	1	1	1	18.7	18.7	18.7	12.279	0.0071485	2.8185	37608000	1	tr|A0A180H2Y5|A0A180H2Y5_PUCT1;tr|A0A0C4F6X2|A0A0C4F6X2_PUCT1	tr|A0A180H2Y5|A0A180H2Y5_PUCT1;tr|A0A0C4F6X2|A0A0C4F6X2_PUCT1	tr|A0A180H2Y5|A0A180H2Y5_PUCT1 Uncharacterized protein OS=Puccinia triticina (isolate 1-1 / race 1 (BBBD)) GN=PTTG_08896 PE=4 SV=1;tr|A0A0C4F6X2|A0A0C4F6X2_PUCT1 Uncharacterized protein OS=Puccinia triticina (isolate 1-1 / race 1 (BBBD)) PE=4 SV=1
		25.5495	2	2	2	21.2	21.2	21.2	20.393	0	12.279	37283000	3	tr|A0A180GU09|A0A180GU09_PUCT1;tr|A0A0C4EVQ6|A0A0C4EVQ6_PUCT1	tr|A0A180GU09|A0A180GU09_PUCT1;tr|A0A0C4EVQ6|A0A0C4EVQ6_PUCT1	tr|A0A180GU09|A0A180GU09_PUCT1 Uncharacterized protein OS=Puccinia triticina (isolate 1-1 / race 1 (BBBD)) GN=PTTG_04892 PE=4 SV=1;tr|A0A0C4EVQ6|A0A0C4EVQ6_PUCT1 Uncharacterized protein OS=Puccinia triticina (isolate 1-1 / race 1 (BBBD)) PE=4 SV=1
		24.8173	1	1	1	9.7	9.7	9.7	14.522	0.0039987	3.2903	36463000	2	tr|A0A0C4FBU2|A0A0C4FBU2_PUCT1;tr|A0A0C4F6M4|A0A0C4F6M4_PUCT1	tr|A0A0C4FBU2|A0A0C4FBU2_PUCT1;tr|A0A0C4F6M4|A0A0C4F6M4_PUCT1	tr|A0A0C4FBU2|A0A0C4FBU2_PUCT1 Uncharacterized protein OS=Puccinia triticina (isolate 1-1 / race 1 (BBBD)) GN=PTTG_10691 PE=4 SV=1;tr|A0A0C4F6M4|A0A0C4F6M4_PUCT1 Uncharacterized protein OS=Puccinia triticina (isolate 1-1 / race 1 (BBBD)) GN=PTTG_08794 PE=4
		24.848	3	3	3	4.5	4.5	4.5	114.27	0.0036839	3.3399	36187000	3	tr|A0A0C4EWV4|A0A0C4EWV4_PUCT1;tr|A0A180H2Q3|A0A180H2Q3_PUCT1	tr|A0A0C4EWV4|A0A0C4EWV4_PUCT1;tr|A0A180H2Q3|A0A180H2Q3_PUCT1	tr|A0A0C4EWV4|A0A0C4EWV4_PUCT1 Uncharacterized protein OS=Puccinia triticina (isolate 1-1 / race 1 (BBBD)) PE=4 SV=1;tr|A0A180H2Q3|A0A180H2Q3_PUCT1 Uncharacterized protein OS=Puccinia triticina (isolate 1-1 / race 1 (BBBD)) GN=PTTG_25543 PE=4 SV=1
		23.3416	2	2	2	24.2	24.2	24.2	15.494	0.00088449	3.944	35252000	2	tr|A0A0C4ELT6|A0A0C4ELT6_PUCT1	tr|A0A0C4ELT6|A0A0C4ELT6_PUCT1	tr|A0A0C4ELT6|A0A0C4ELT6_PUCT1 Uncharacterized protein OS=Puccinia triticina (isolate 1-1 / race 1 (BBBD)) GN=PTTG_01723 PE=4 SV=1
		24.4717	1	1	1	5.2	5.2	5.2	43.869	0	11.105	34903000	1	tr|A0A180GA92|A0A180GA92_PUCT1;tr|A0A0C4EM69|A0A0C4EM69_PUCT1	tr|A0A180GA92|A0A180GA92_PUCT1;tr|A0A0C4EM69|A0A0C4EM69_PUCT1	tr|A0A180GA92|A0A180GA92_PUCT1 Ketol-acid reductoisomerase, mitochondrial OS=Puccinia triticina (isolate 1-1 / race 1 (BBBD)) GN=PTTG_01858 PE=3 SV=1;tr|A0A0C4EM69|A0A0C4EM69_PUCT1 Ketol-acid reductoisomerase, mitochondrial OS=Puccinia triticina (isolate 1
		24.4452	1	1	1	7.1	7.1	7.1	24.074	0.00054083	4.2279	34271000	1	tr|A0A0C4EWC1|A0A0C4EWC1_PUCT1	tr|A0A0C4EWC1|A0A0C4EWC1_PUCT1	tr|A0A0C4EWC1|A0A0C4EWC1_PUCT1 40S ribosomal protein S8 OS=Puccinia triticina (isolate 1-1 / race 1 (BBBD)) GN=PTTG_05114 PE=3 SV=1
		24.7896	10	3	3	37.4	10.9	10.9	29.481	0.00054645	4.3582	31238000	3	tr|A0A0C4F0D9|A0A0C4F0D9_PUCT1	tr|A0A0C4F0D9|A0A0C4F0D9_PUCT1	tr|A0A0C4F0D9|A0A0C4F0D9_PUCT1 14-3-3-like protein OS=Puccinia triticina (isolate 1-1 / race 1 (BBBD)) GN=PTTG_06555 PE=3 SV=1
		24.571	2	2	2	12.7	12.7	12.7	28.256	0.0039933	3.2755	28383000	1	tr|A0A180GK70|A0A180GK70_PUCT1;tr|A0A0C4EPK7|A0A0C4EPK7_PUCT1	tr|A0A180GK70|A0A180GK70_PUCT1;tr|A0A0C4EPK7|A0A0C4EPK7_PUCT1	tr|A0A180GK70|A0A180GK70_PUCT1 Uncharacterized protein OS=Puccinia triticina (isolate 1-1 / race 1 (BBBD)) GN=PTTG_02709 PE=4 SV=1;tr|A0A0C4EPK7|A0A0C4EPK7_PUCT1 Uncharacterized protein OS=Puccinia triticina (isolate 1-1 / race 1 (BBBD)) PE=4 SV=1
		23.6839	1	1	1	18.1	18.1	18.1	9.1896	0	16.404	26424000	2	tr|A0A180G971|A0A180G971_PUCT1;tr|A0A0C4F563|A0A0C4F563_PUCT1	tr|A0A180G971|A0A180G971_PUCT1;tr|A0A0C4F563|A0A0C4F563_PUCT1	tr|A0A180G971|A0A180G971_PUCT1 40S ribosomal protein S27 OS=Puccinia triticina (isolate 1-1 / race 1 (BBBD)) GN=PTTG_08260 PE=3 SV=1;tr|A0A0C4F563|A0A0C4F563_PUCT1 40S ribosomal protein S27 OS=Puccinia triticina (isolate 1-1 / race 1 (BBBD)) PE=3 SV=1
		23.9765	2	2	1	1.1	1.1	0.7	235.44	0.0052236	3.084	26319000	2	tr|A0A0C4ESR3|A0A0C4ESR3_PUCT1;tr|A0A180GRY9|A0A180GRY9_PUCT1;tr|A0A180GSN0|A0A180GSN0_PUCT1;tr|A0A0C4EWH8|A0A0C4EWH8_PUCT1;tr|A0A180G5V7|A0A180G5V7_PUCT1;tr|A0A0C4F1I0|A0A0C4F1I0_PUCT1	tr|A0A0C4ESR3|A0A0C4ESR3_PUCT1;tr|A0A180GRY9|A0A180GRY9_PUCT1;tr|A0A180GSN0|A0A180GSN0_PUCT1;tr|A0A0C4EWH8|A0A0C4EWH8_PUCT1;tr|A0A180G5V7|A0A180G5V7_PUCT1;tr|A0A0C4F1I0|A0A0C4F1I0_PUCT1	tr|A0A0C4ESR3|A0A0C4ESR3_PUCT1 Uncharacterized protein OS=Puccinia triticina (isolate 1-1 / race 1 (BBBD)) PE=4 SV=1;tr|A0A180GRY9|A0A180GRY9_PUCT1 Uncharacterized protein OS=Puccinia triticina (isolate 1-1 / race 1 (BBBD)) GN=PTTG_03842 PE=4 SV=1;tr|A0A18
		24.6148	2	2	2	4.2	4.2	4.2	60.565	0.0071747	2.842	25511000	2	tr|A0A0C4ETP2|A0A0C4ETP2_PUCT1;tr|A0A180GSW6|A0A180GSW6_PUCT1	tr|A0A0C4ETP2|A0A0C4ETP2_PUCT1;tr|A0A180GSW6|A0A180GSW6_PUCT1	tr|A0A0C4ETP2|A0A0C4ETP2_PUCT1 Uncharacterized protein OS=Puccinia triticina (isolate 1-1 / race 1 (BBBD)) PE=4 SV=1;tr|A0A180GSW6|A0A180GSW6_PUCT1 Uncharacterized protein OS=Puccinia triticina (isolate 1-1 / race 1 (BBBD)) GN=PTTG_04171 PE=4 SV=1
		22.8832	1	1	1	1.2	1.2	1.2	130.13	0.0053632	3.0363	25277000	2	tr|A0A0C4END7|A0A0C4END7_PUCT1	tr|A0A0C4END7|A0A0C4END7_PUCT1	tr|A0A0C4END7|A0A0C4END7_PUCT1 Carbamoyl-phosphate synthase arginine-specific large chain OS=Puccinia triticina (isolate 1-1 / race 1 (BBBD)) GN=PTTG_02278 PE=4 SV=1
		24.4676	2	2	2	32.2	32.2	32.2	9.5035	0	21.75	24289000	3	tr|A0A0C4F163|A0A0C4F163_PUCT1	tr|A0A0C4F163|A0A0C4F163_PUCT1	tr|A0A0C4F163|A0A0C4F163_PUCT1 40S ribosomal protein S21 OS=Puccinia triticina (isolate 1-1 / race 1 (BBBD)) GN=PTTG_06833 PE=3 SV=1
		24.3114	3	3	3	10	10	10	46.08	0.0018979	3.6354	23520000	3	tr|A0A0C4F283|A0A0C4F283_PUCT1;tr|A0A180G334|A0A180G334_PUCT1	tr|A0A0C4F283|A0A0C4F283_PUCT1;tr|A0A180G334|A0A180G334_PUCT1	tr|A0A0C4F283|A0A0C4F283_PUCT1 Uncharacterized protein OS=Puccinia triticina (isolate 1-1 / race 1 (BBBD)) PE=4 SV=1;tr|A0A180G334|A0A180G334_PUCT1 Uncharacterized protein OS=Puccinia triticina (isolate 1-1 / race 1 (BBBD)) GN=PTTG_07204 PE=4 SV=1
		23.746	4	1	1	15.7	6.5	6.5	24.155	0.0050712	3.1055	20950000	2	tr|A0A0C4EMW3|A0A0C4EMW3_PUCT1	tr|A0A0C4EMW3|A0A0C4EMW3_PUCT1	tr|A0A0C4EMW3|A0A0C4EMW3_PUCT1 GTP-binding nuclear protein OS=Puccinia triticina (isolate 1-1 / race 1 (BBBD)) GN=PTTG_02103 PE=3 SV=1
		24.1257	2	2	2	22.4	22.4	22.4	20.034	0.00037994	5.0136	20217000	1	tr|A0A0C4EK82|A0A0C4EK82_PUCT1	tr|A0A0C4EK82|A0A0C4EK82_PUCT1	tr|A0A0C4EK82|A0A0C4EK82_PUCT1 Uncharacterized protein OS=Puccinia triticina (isolate 1-1 / race 1 (BBBD)) GN=PTTG_01156 PE=4 SV=1
		24.5926	2	1	1	4.3	2.9	2.9	54.474	0.00038782	5.375	19908000	1	tr|A0A180G1W2|A0A180G1W2_PUCT1;tr|A0A0C4EKU1|A0A0C4EKU1_PUCT1	tr|A0A180G1W2|A0A180G1W2_PUCT1;tr|A0A0C4EKU1|A0A0C4EKU1_PUCT1	tr|A0A180G1W2|A0A180G1W2_PUCT1 Dihydrolipoyl dehydrogenase OS=Puccinia triticina (isolate 1-1 / race 1 (BBBD)) GN=PTTG_01369 PE=3 SV=1;tr|A0A0C4EKU1|A0A0C4EKU1_PUCT1 Dihydrolipoyl dehydrogenase OS=Puccinia triticina (isolate 1-1 / race 1 (BBBD)) PE=3 SV=1
		24.6741	1	1	1	16.1	16.1	16.1	13.937	0	8.2601	17978000	1	tr|A0A180G747|A0A180G747_PUCT1;tr|A0A0C4F2D2|A0A0C4F2D2_PUCT1	tr|A0A180G747|A0A180G747_PUCT1;tr|A0A0C4F2D2|A0A0C4F2D2_PUCT1	tr|A0A180G747|A0A180G747_PUCT1 Nuclear transport factor 2 OS=Puccinia triticina (isolate 1-1 / race 1 (BBBD)) GN=PTTG_07253 PE=4 SV=1;tr|A0A0C4F2D2|A0A0C4F2D2_PUCT1 Uncharacterized protein OS=Puccinia triticina (isolate 1-1 / race 1 (BBBD)) PE=4 SV=1
		24.2732	2	2	2	8	8	8	57.814	0.0030748	3.5501	17313000	3	tr|A0A180GE35|A0A180GE35_PUCT1;tr|A0A0C4EZ33|A0A0C4EZ33_PUCT1	tr|A0A180GE35|A0A180GE35_PUCT1;tr|A0A0C4EZ33|A0A0C4EZ33_PUCT1	tr|A0A180GE35|A0A180GE35_PUCT1 Uncharacterized protein OS=Puccinia triticina (isolate 1-1 / race 1 (BBBD)) GN=PTTG_06088 PE=4 SV=1;tr|A0A0C4EZ33|A0A0C4EZ33_PUCT1 Uncharacterized protein OS=Puccinia triticina (isolate 1-1 / race 1 (BBBD)) PE=4 SV=1
		21.4803	1	1	1	9	9	9	15.048	0.0089049	2.6562	14136000	2	tr|A0A0C4EN47|A0A0C4EN47_PUCT1;tr|A0A180GET8|A0A180GET8_PUCT1	tr|A0A0C4EN47|A0A0C4EN47_PUCT1;tr|A0A180GET8|A0A180GET8_PUCT1	tr|A0A0C4EN47|A0A0C4EN47_PUCT1 Uncharacterized protein OS=Puccinia triticina (isolate 1-1 / race 1 (BBBD)) PE=4 SV=1;tr|A0A180GET8|A0A180GET8_PUCT1 Uncharacterized protein OS=Puccinia triticina (isolate 1-1 / race 1 (BBBD)) GN=PTTG_02187 PE=4 SV=1
		23.1059	2	2	2	1.9	1.9	1.9	111.19	0.0087692	2.6831	12446000	2	tr|A0A0C4EHJ2|A0A0C4EHJ2_PUCT1;tr|A0A180GYT3|A0A180GYT3_PUCT1	tr|A0A0C4EHJ2|A0A0C4EHJ2_PUCT1;tr|A0A180GYT3|A0A180GYT3_PUCT1	tr|A0A0C4EHJ2|A0A0C4EHJ2_PUCT1 Uncharacterized protein OS=Puccinia triticina (isolate 1-1 / race 1 (BBBD)) PE=4 SV=1;tr|A0A180GYT3|A0A180GYT3_PUCT1 Uncharacterized protein OS=Puccinia triticina (isolate 1-1 / race 1 (BBBD)) GN=PTTG_00208 PE=4 SV=1
		23.3629	1	1	1	11.3	11.3	11.3	23.786	0	8.1731	11915000	1	tr|A0A180GQH9|A0A180GQH9_PUCT1	tr|A0A180GQH9|A0A180GQH9_PUCT1	tr|A0A180GQH9|A0A180GQH9_PUCT1 Carbonic anhydrase OS=Puccinia triticina (isolate 1-1 / race 1 (BBBD)) GN=PTTG_03906 PE=3 SV=1
		23.1783	4	2	2	7.7	4.9	4.9	67.895	0.00054348	4.2886	10810000	2	tr|A0A0C4F2L9|A0A0C4F2L9_PUCT1;tr|A0A180GCB3|A0A180GCB3_PUCT1	tr|A0A0C4F2L9|A0A0C4F2L9_PUCT1;tr|A0A180GCB3|A0A180GCB3_PUCT1	tr|A0A0C4F2L9|A0A0C4F2L9_PUCT1 Lysine--tRNA ligase OS=Puccinia triticina (isolate 1-1 / race 1 (BBBD)) PE=3 SV=1;tr|A0A180GCB3|A0A180GCB3_PUCT1 Lysine--tRNA ligase OS=Puccinia triticina (isolate 1-1 / race 1 (BBBD)) GN=PTTG_07340 PE=3 SV=1
		22.2163	1	1	1	9	9	9	15.823	0.0068811	2.8791	7934700	2	tr|A0A180G771|A0A180G771_PUCT1;tr|A0A0C4F4G2|A0A0C4F4G2_PUCT1	tr|A0A180G771|A0A180G771_PUCT1;tr|A0A0C4F4G2|A0A0C4F4G2_PUCT1	tr|A0A180G771|A0A180G771_PUCT1 40S ribosomal protein S23 OS=Puccinia triticina (isolate 1-1 / race 1 (BBBD)) GN=PTTG_08002 PE=3 SV=1;tr|A0A0C4F4G2|A0A0C4F4G2_PUCT1 Uncharacterized protein OS=Puccinia triticina (isolate 1-1 / race 1 (BBBD)) PE=3 SV=1
		22.7738	1	1	1	8.3	8.3	8.3	25.638	0.0027379	3.5682	7508300	1	tr|A0A180H137|A0A180H137_PUCT1	tr|A0A180H137|A0A180H137_PUCT1	tr|A0A180H137|A0A180H137_PUCT1 Uncharacterized protein OS=Puccinia triticina (isolate 1-1 / race 1 (BBBD)) GN=PTTG_25676 PE=4 SV=1
		22.585	1	1	1	20.5	20.5	20.5	19.189	0.0015721	3.7939	7165100	1	tr|A0A180GJV3|A0A180GJV3_PUCT1	tr|A0A180GJV3|A0A180GJV3_PUCT1	tr|A0A180GJV3|A0A180GJV3_PUCT1 Ubiquitin-conjugating enzyme E2 G1 OS=Puccinia triticina (isolate 1-1 / race 1 (BBBD)) GN=PTTG_27488 PE=3 SV=1
		21.9337	2	2	2	9.9	9.9	9.9	28.077	0.0050786	3.1145	5964900	2	tr|A0A180GCW1|A0A180GCW1_PUCT1;tr|A0A0C4F4S0|A0A0C4F4S0_PUCT1	tr|A0A180GCW1|A0A180GCW1_PUCT1;tr|A0A0C4F4S0|A0A0C4F4S0_PUCT1	tr|A0A180GCW1|A0A180GCW1_PUCT1 Proteasome subunit alpha type OS=Puccinia triticina (isolate 1-1 / race 1 (BBBD)) GN=PTTG_08110 PE=3 SV=1;tr|A0A0C4F4S0|A0A0C4F4S0_PUCT1 Proteasome endopeptidase complex OS=Puccinia triticina (isolate 1-1 / race 1 (BBBD)) PE=
			1	1	1	12.7	12.7	12.7	13.126	0.0040053	3.3079	0	0	tr|A0A180H0Y5|A0A180H0Y5_PUCT1	tr|A0A180H0Y5|A0A180H0Y5_PUCT1	tr|A0A180H0Y5|A0A180H0Y5_PUCT1 Uncharacterized protein OS=Puccinia triticina (isolate 1-1 / race 1 (BBBD)) GN=PTTG_11690 PE=4 SV=1
			1	1	1	10	10	10	15.956	0.0089007	2.6508	0	0	tr|A0A0C4EWG3|A0A0C4EWG3_PUCT1;tr|A0A180GQG3|A0A180GQG3_PUCT1	tr|A0A0C4EWG3|A0A0C4EWG3_PUCT1;tr|A0A180GQG3|A0A180GQG3_PUCT1	tr|A0A0C4EWG3|A0A0C4EWG3_PUCT1 Uncharacterized protein OS=Puccinia triticina (isolate 1-1 / race 1 (BBBD)) PE=3 SV=1;tr|A0A180GQG3|A0A180GQG3_PUCT1 40S ribosomal protein S11 OS=Puccinia triticina (isolate 1-1 / race 1 (BBBD)) GN=PTTG_05158 PE=3 SV=1
			1	1	1	11.6	11.6	11.6	16.378	0	59.677	0	0	tr|A0A180GP14|A0A180GP14_PUCT1	tr|A0A180GP14|A0A180GP14_PUCT1	tr|A0A180GP14|A0A180GP14_PUCT1 Uncharacterized protein (Fragment) OS=Puccinia triticina (isolate 1-1 / race 1 (BBBD)) GN=PTTG_11739 PE=4 SV=1
			1	1	1	10.5	10.5	10.5	25.779	0.0071542	2.8279	0	0	tr|A0A0C4EMA8|A0A0C4EMA8_PUCT1	tr|A0A0C4EMA8|A0A0C4EMA8_PUCT1	tr|A0A0C4EMA8|A0A0C4EMA8_PUCT1 Uncharacterized protein OS=Puccinia triticina (isolate 1-1 / race 1 (BBBD)) GN=PTTG_01898 PE=4 SV=1
			1	1	1	8.7	8.7	8.7	27.473	0.0041288	3.2028	0	0	tr|A0A0C4F7M2|A0A0C4F7M2_PUCT1	tr|A0A0C4F7M2|A0A0C4F7M2_PUCT1	tr|A0A0C4F7M2|A0A0C4F7M2_PUCT1 Uncharacterized protein OS=Puccinia triticina (isolate 1-1 / race 1 (BBBD)) GN=PTTG_09156 PE=4 SV=1
			1	1	1	2.1	2.1	2.1	54.017	0.00055289	4.5292	0	0	tr|A0A180GZT1|A0A180GZT1_PUCT1	tr|A0A180GZT1|A0A180GZT1_PUCT1	tr|A0A180GZT1|A0A180GZT1_PUCT1 Uncharacterized protein OS=Puccinia triticina (isolate 1-1 / race 1 (BBBD)) GN=PTTG_25860 PE=4 SV=1
			1	1	1	2.1	2.1	2.1	92.083	0.0033738	3.4032	0	0	tr|A0A180GAI1|A0A180GAI1_PUCT1	tr|A0A180GAI1|A0A180GAI1_PUCT1	tr|A0A180GAI1|A0A180GAI1_PUCT1 Uncharacterized protein OS=Puccinia triticina (isolate 1-1 / race 1 (BBBD)) GN=PTTG_28618 PE=4 SV=1
			2	2	2	1.9	1.9	1.9	133.76	0.00019912	5.9106	0	0	tr|A0A0C4F6L5|A0A0C4F6L5_PUCT1;tr|A0A0C4EKS9|A0A0C4EKS9_PUCT1;tr|A0A180G866|A0A180G866_PUCT1	tr|A0A0C4F6L5|A0A0C4F6L5_PUCT1;tr|A0A0C4EKS9|A0A0C4EKS9_PUCT1;tr|A0A180G866|A0A180G866_PUCT1	tr|A0A0C4F6L5|A0A0C4F6L5_PUCT1 Uncharacterized protein OS=Puccinia triticina (isolate 1-1 / race 1 (BBBD)) PE=4 SV=1;tr|A0A0C4EKS9|A0A0C4EKS9_PUCT1 Uncharacterized protein OS=Puccinia triticina (isolate 1-1 / race 1 (BBBD)) PE=4 SV=1;tr|A0A180G866|A0A180G8
	30.0895	30.8823	9	9	9	29.7	29.7	29.7	46.841	0	41.759	26315000000	77	tr|A0A0C4ESP2|A0A0C4ESP2_PUCT1;tr|A0A180G1R1|A0A180G1R1_PUCT1	tr|A0A0C4ESP2|A0A0C4ESP2_PUCT1;tr|A0A180G1R1|A0A180G1R1_PUCT1	tr|A0A0C4ESP2|A0A0C4ESP2_PUCT1 Adenosylhomocysteinase OS=Puccinia triticina (isolate 1-1 / race 1 (BBBD)) PE=3 SV=1;tr|A0A180G1R1|A0A180G1R1_PUCT1 Adenosylhomocysteinase OS=Puccinia triticina (isolate 1-1 / race 1 (BBBD)) GN=PTTG_03821 PE=3 SV=1
	28.3256	29.6956	2	2	2	10.8	10.8	10.8	27.889	0	70.662	11739000000	84	tr|A0A0C4EPC6|A0A0C4EPC6_PUCT1;tr|A0A0C4ERW2|A0A0C4ERW2_PUCT1;tr|A0A180G5L8|A0A180G5L8_PUCT1	tr|A0A0C4EPC6|A0A0C4EPC6_PUCT1;tr|A0A0C4ERW2|A0A0C4ERW2_PUCT1;tr|A0A180G5L8|A0A180G5L8_PUCT1	tr|A0A0C4EPC6|A0A0C4EPC6_PUCT1 Uncharacterized protein OS=Puccinia triticina (isolate 1-1 / race 1 (BBBD)) GN=PTTG_02627 PE=4 SV=1;tr|A0A0C4ERW2|A0A0C4ERW2_PUCT1 Uncharacterized protein OS=Puccinia triticina (isolate 1-1 / race 1 (BBBD)) PE=4 SV=1;tr|A0A18
	27.5006	29.5335	6	6	5	32.3	32.3	26.8	13.919	0	42.763	3482400000	53	tr|A0A180FX95|A0A180FX95_PUCT1	tr|A0A180FX95|A0A180FX95_PUCT1	tr|A0A180FX95|A0A180FX95_PUCT1 Uncharacterized protein OS=Puccinia triticina (isolate 1-1 / race 1 (BBBD)) GN=PTTG_12725 PE=4 SV=1
	26.1726	30.1041	26	17	17	45.2	32	32	70.902	0	179.23	3135600000	56	tr|A0A0C4ERQ8|A0A0C4ERQ8_PUCT1	tr|A0A0C4ERQ8|A0A0C4ERQ8_PUCT1	tr|A0A0C4ERQ8|A0A0C4ERQ8_PUCT1 Heat shock protein HSS1 OS=Puccinia triticina (isolate 1-1 / race 1 (BBBD)) GN=PTTG_03478 PE=3 SV=1
	27.5204	29.912	20	20	20	63	63	63	47.379	0	279.84	2876400000	71	tr|A0A180H402|A0A180H402_PUCT1;tr|A0A0C4EI64|A0A0C4EI64_PUCT1	tr|A0A180H402|A0A180H402_PUCT1;tr|A0A0C4EI64|A0A0C4EI64_PUCT1	tr|A0A180H402|A0A180H402_PUCT1 Enolase OS=Puccinia triticina (isolate 1-1 / race 1 (BBBD)) GN=PTTG_00430 PE=3 SV=1;tr|A0A0C4EI64|A0A0C4EI64_PUCT1 Uncharacterized protein OS=Puccinia triticina (isolate 1-1 / race 1 (BBBD)) PE=3 SV=1
	28.2077	29.8687	17	12	10	64	56.1	45.1	29.33	0	119.04	2716400000	48	tr|A0A180H2R5|A0A180H2R5_PUCT1;tr|A0A180H2T8|A0A180H2T8_PUCT1;tr|A0A0C4EYA2|A0A0C4EYA2_PUCT1	tr|A0A180H2R5|A0A180H2R5_PUCT1;tr|A0A180H2T8|A0A180H2T8_PUCT1;tr|A0A0C4EYA2|A0A0C4EYA2_PUCT1	tr|A0A180H2R5|A0A180H2R5_PUCT1 Protein BMH2 OS=Puccinia triticina (isolate 1-1 / race 1 (BBBD)) GN=PTTG_05801 PE=3 SV=1;tr|A0A180H2T8|A0A180H2T8_PUCT1 Protein BMH2, variant OS=Puccinia triticina (isolate 1-1 / race 1 (BBBD)) GN=PTTG_05801 PE=3 SV=1;tr|A0A0
	25.5022	29.4748	24	22	21	37.6	35.9	33.3	72.295	0	128.84	1952200000	43	tr|A0A180GG57|A0A180GG57_PUCT1;tr|A0A0C4F2G0|A0A0C4F2G0_PUCT1	tr|A0A180GG57|A0A180GG57_PUCT1;tr|A0A0C4F2G0|A0A0C4F2G0_PUCT1	tr|A0A180GG57|A0A180GG57_PUCT1 Glucose-regulated protein OS=Puccinia triticina (isolate 1-1 / race 1 (BBBD)) GN=PTTG_07281 PE=3 SV=1;tr|A0A0C4F2G0|A0A0C4F2G0_PUCT1 Uncharacterized protein OS=Puccinia triticina (isolate 1-1 / race 1 (BBBD)) PE=3 SV=1
	27.4892	29.1092	18	18	18	32.9	32.9	32.9	85.501	0	169.84	1853800000	48	tr|A0A0C4EZX0|A0A0C4EZX0_PUCT1	tr|A0A0C4EZX0|A0A0C4EZX0_PUCT1	tr|A0A0C4EZX0|A0A0C4EZX0_PUCT1 5-methyltetrahydropteroyltriglutamate-homocysteine methyltransferase OS=Puccinia triticina (isolate 1-1 / race 1 (BBBD)) GN=PTTG_06381 PE=3 SV=1
	27.6816	27.4375	2	2	2	1.5	1.5	1.5	121.33	0.0053659	3.0381	1084500000	13	tr|A0A180GQ25|A0A180GQ25_PUCT1	tr|A0A180GQ25|A0A180GQ25_PUCT1	tr|A0A180GQ25|A0A180GQ25_PUCT1 Uncharacterized protein OS=Puccinia triticina (isolate 1-1 / race 1 (BBBD)) GN=PTTG_26845 PE=4 SV=1
	26.1449	26.1792	2	2	2	9.4	9.4	9.4	10.981	0	7.4879	983670000	43	tr|A0A180G7W2|A0A180G7W2_PUCT1;tr|A0A0C4F0S9|A0A0C4F0S9_PUCT1	tr|A0A180G7W2|A0A180G7W2_PUCT1;tr|A0A0C4F0S9|A0A0C4F0S9_PUCT1	tr|A0A180G7W2|A0A180G7W2_PUCT1 60S ribosomal protein L44 Q (Fragment) OS=Puccinia triticina (isolate 1-1 / race 1 (BBBD)) GN=PTTG_06699 PE=3 SV=1;tr|A0A0C4F0S9|A0A0C4F0S9_PUCT1 Uncharacterized protein OS=Puccinia triticina (isolate 1-1 / race 1 (BBBD)) PE=
	25.3131	28.4376	7	7	7	31.6	31.6	31.6	39.515	0	41.825	850510000	29	tr|A0A180G7H5|A0A180G7H5_PUCT1;tr|A0A0C4EVB3|A0A0C4EVB3_PUCT1	tr|A0A180G7H5|A0A180G7H5_PUCT1	tr|A0A180G7H5|A0A180G7H5_PUCT1 Uncharacterized protein OS=Puccinia triticina (isolate 1-1 / race 1 (BBBD)) GN=PTTG_04746 PE=4 SV=1
	26.1357	27.2962	4	4	4	20	20	20	27.672	0	11.119	799410000	15	tr|A0A180G327|A0A180G327_PUCT1;tr|A0A0C4EPB2|A0A0C4EPB2_PUCT1	tr|A0A180G327|A0A180G327_PUCT1;tr|A0A0C4EPB2|A0A0C4EPB2_PUCT1	tr|A0A180G327|A0A180G327_PUCT1 Triosephosphate isomerase OS=Puccinia triticina (isolate 1-1 / race 1 (BBBD)) GN=PTTG_02613 PE=3 SV=1;tr|A0A0C4EPB2|A0A0C4EPB2_PUCT1 Triosephosphate isomerase OS=Puccinia triticina (isolate 1-1 / race 1 (BBBD)) PE=3 SV=1
	26.0195	27.8702	8	8	8	26.1	26.1	26.1	42.878	0	21.899	762910000	21	tr|A0A180GDN1|A0A180GDN1_PUCT1;tr|A0A0C4F851|A0A0C4F851_PUCT1	tr|A0A180GDN1|A0A180GDN1_PUCT1;tr|A0A0C4F851|A0A0C4F851_PUCT1	tr|A0A180GDN1|A0A180GDN1_PUCT1 Uncharacterized protein OS=Puccinia triticina (isolate 1-1 / race 1 (BBBD)) GN=PTTG_09338 PE=4 SV=1;tr|A0A0C4F851|A0A0C4F851_PUCT1 Uncharacterized protein OS=Puccinia triticina (isolate 1-1 / race 1 (BBBD)) PE=4 SV=1
	26.7551	27.6111	10	9	9	14	12.6	12.6	93.481	0	23.372	730670000	22	tr|A0A180GW06|A0A180GW06_PUCT1;tr|A0A0C4EJS3|A0A0C4EJS3_PUCT1	tr|A0A180GW06|A0A180GW06_PUCT1;tr|A0A0C4EJS3|A0A0C4EJS3_PUCT1	tr|A0A180GW06|A0A180GW06_PUCT1 Elongation factor 2 OS=Puccinia triticina (isolate 1-1 / race 1 (BBBD)) GN=PTTG_00994 PE=4 SV=1;tr|A0A0C4EJS3|A0A0C4EJS3_PUCT1 Uncharacterized protein OS=Puccinia triticina (isolate 1-1 / race 1 (BBBD)) PE=4 SV=1
	25.5145	26.5693	8	8	8	24.6	24.6	24.6	38.772	0	37.511	495010000	15	tr|A0A180G1J2|A0A180G1J2_PUCT1;tr|A0A0C4ENY3|A0A0C4ENY3_PUCT1;tr|A0A0C4FCG7|A0A0C4FCG7_PUCT1	tr|A0A180G1J2|A0A180G1J2_PUCT1;tr|A0A0C4ENY3|A0A0C4ENY3_PUCT1	tr|A0A180G1J2|A0A180G1J2_PUCT1 Transaldolase (Fragment) OS=Puccinia triticina (isolate 1-1 / race 1 (BBBD)) GN=PTTG_29878 PE=3 SV=1;tr|A0A0C4ENY3|A0A0C4ENY3_PUCT1 Uncharacterized protein OS=Puccinia triticina (isolate 1-1 / race 1 (BBBD)) PE=4 SV=1
	25.3187	27.2024	6	6	6	18.8	18.8	18.8	51.561	0	24.013	473980000	18	tr|A0A0C4F8C0|A0A0C4F8C0_PUCT1	tr|A0A0C4F8C0|A0A0C4F8C0_PUCT1	tr|A0A0C4F8C0|A0A0C4F8C0_PUCT1 Citrate synthase OS=Puccinia triticina (isolate 1-1 / race 1 (BBBD)) GN=PTTG_09412 PE=3 SV=1
	24.2116	27.2683	5	5	5	45	45	45	16.604	0	102.3	447760000	10	tr|A0A0C4EI30|A0A0C4EI30_PUCT1;tr|A0A180GZS4|A0A180GZS4_PUCT1	tr|A0A0C4EI30|A0A0C4EI30_PUCT1;tr|A0A180GZS4|A0A180GZS4_PUCT1	tr|A0A0C4EI30|A0A0C4EI30_PUCT1 Uncharacterized protein OS=Puccinia triticina (isolate 1-1 / race 1 (BBBD)) PE=4 SV=1;tr|A0A180GZS4|A0A180GZS4_PUCT1 Uncharacterized protein OS=Puccinia triticina (isolate 1-1 / race 1 (BBBD)) GN=PTTG_00396 PE=4 SV=1
	25.6959	26.715	3	3	3	27.9	27.9	27.9	14.817	0	12.863	244850000	6	tr|A0A0C4EUQ7|A0A0C4EUQ7_PUCT1	tr|A0A0C4EUQ7|A0A0C4EUQ7_PUCT1	tr|A0A0C4EUQ7|A0A0C4EUQ7_PUCT1 40S ribosomal protein S22 OS=Puccinia triticina (isolate 1-1 / race 1 (BBBD)) GN=PTTG_04538 PE=3 SV=1
	25.166	26.0782	10	10	10	14.1	14.1	14.1	116.02	0	22.929	225120000	21	tr|A0A0C4EZ56|A0A0C4EZ56_PUCT1	tr|A0A0C4EZ56|A0A0C4EZ56_PUCT1	tr|A0A0C4EZ56|A0A0C4EZ56_PUCT1 Elongation factor EF-3 OS=Puccinia triticina (isolate 1-1 / race 1 (BBBD)) GN=PTTG_06112 PE=4 SV=1
	24.5667	24.6262	2	2	2	10.9	10.9	10.9	40.701	0	12.209	115460000	15	tr|A0A0C4EKV3|A0A0C4EKV3_PUCT1;tr|A0A180GCC9|A0A180GCC9_PUCT1	tr|A0A0C4EKV3|A0A0C4EKV3_PUCT1;tr|A0A180GCC9|A0A180GCC9_PUCT1	tr|A0A0C4EKV3|A0A0C4EKV3_PUCT1 Uncharacterized protein OS=Puccinia triticina (isolate 1-1 / race 1 (BBBD)) PE=3 SV=1;tr|A0A180GCC9|A0A180GCC9_PUCT1 Uncharacterized protein OS=Puccinia triticina (isolate 1-1 / race 1 (BBBD)) GN=PTTG_01381 PE=3 SV=1
	27.6624	28.1182	2	2	2	0.7	0.7	0.7	272.87	0.003527	3.3716	2759200000	26	tr|A0A0C4EWN2|A0A0C4EWN2_PUCT1;tr|A0A180GQC3|A0A180GQC3_PUCT1	tr|A0A0C4EWN2|A0A0C4EWN2_PUCT1;tr|A0A180GQC3|A0A180GQC3_PUCT1	tr|A0A0C4EWN2|A0A0C4EWN2_PUCT1 Uncharacterized protein OS=Puccinia triticina (isolate 1-1 / race 1 (BBBD)) PE=4 SV=1;tr|A0A180GQC3|A0A180GQC3_PUCT1 Uncharacterized protein OS=Puccinia triticina (isolate 1-1 / race 1 (BBBD)) GN=PTTG_05227 PE=4 SV=1
			5	4	4	2.5	1.7	1.7	232.53	0	11.023	1436000000	30	tr|A0A0C4EPN4|A0A0C4EPN4_PUCT1;tr|A0A180GJP5|A0A180GJP5_PUCT1	tr|A0A0C4EPN4|A0A0C4EPN4_PUCT1;tr|A0A180GJP5|A0A180GJP5_PUCT1	tr|A0A0C4EPN4|A0A0C4EPN4_PUCT1 Uncharacterized protein OS=Puccinia triticina (isolate 1-1 / race 1 (BBBD)) PE=4 SV=1;tr|A0A180GJP5|A0A180GJP5_PUCT1 Glutamate synthase [NADPH] OS=Puccinia triticina (isolate 1-1 / race 1 (BBBD)) GN=PTTG_02737 PE=4 SV=1
			2	2	2	2.2	2.2	2.2	79.442	0.0094515	2.5942	910380000	15	tr|A0A180GA70|A0A180GA70_PUCT1;tr|A0A180GBP3|A0A180GBP3_PUCT1	tr|A0A180GA70|A0A180GA70_PUCT1;tr|A0A180GBP3|A0A180GBP3_PUCT1	tr|A0A180GA70|A0A180GA70_PUCT1 Uncharacterized protein OS=Puccinia triticina (isolate 1-1 / race 1 (BBBD)) GN=PTTG_03985 PE=4 SV=1;tr|A0A180GBP3|A0A180GBP3_PUCT1 Uncharacterized protein OS=Puccinia triticina (isolate 1-1 / race 1 (BBBD)) GN=PTTG_03346 PE=4
	28.4994		1	1	1	1.3	1.3	1.3	92.454	0.005798	2.9477	3101600000	16	tr|A0A180G945|A0A180G945_PUCT1;tr|A0A0C4EM60|A0A0C4EM60_PUCT1	tr|A0A180G945|A0A180G945_PUCT1;tr|A0A0C4EM60|A0A0C4EM60_PUCT1	tr|A0A180G945|A0A180G945_PUCT1 Uncharacterized protein OS=Puccinia triticina (isolate 1-1 / race 1 (BBBD)) GN=PTTG_01849 PE=4 SV=1;tr|A0A0C4EM60|A0A0C4EM60_PUCT1 Uncharacterized protein OS=Puccinia triticina (isolate 1-1 / race 1 (BBBD)) PE=4 SV=1
	26.3257		1	1	1	1.2	1.2	1.2	77.253	0.0071463	2.8142	598040000	4	tr|A0A180H5X8|A0A180H5X8_PUCT1	tr|A0A180H5X8|A0A180H5X8_PUCT1	tr|A0A180H5X8|A0A180H5X8_PUCT1 Uncharacterized protein OS=Puccinia triticina (isolate 1-1 / race 1 (BBBD)) GN=PTTG_25109 PE=4 SV=1
	26.5921		2	2	2	13.7	13.7	13.7	16.713	0.0041487	3.2522	322340000	5	tr|A0A180GBI9|A0A180GBI9_PUCT1;tr|A0A180H5W9|A0A180H5W9_PUCT1;tr|A0A0C4F4L3|A0A0C4F4L3_PUCT1	tr|A0A180GBI9|A0A180GBI9_PUCT1;tr|A0A180H5W9|A0A180H5W9_PUCT1;tr|A0A0C4F4L3|A0A0C4F4L3_PUCT1	tr|A0A180GBI9|A0A180GBI9_PUCT1 Uncharacterized protein OS=Puccinia triticina (isolate 1-1 / race 1 (BBBD)) GN=PTTG_28590 PE=4 SV=1;tr|A0A180H5W9|A0A180H5W9_PUCT1 Uncharacterized protein OS=Puccinia triticina (isolate 1-1 / race 1 (BBBD)) GN=PTTG_25184 PE=4
	25.5818		2	2	2	33.8	33.8	33.8	7.379	0.00019573	5.5855	49798000	3	tr|A0A0C4F7Y7|A0A0C4F7Y7_PUCT1	tr|A0A0C4F7Y7|A0A0C4F7Y7_PUCT1	tr|A0A0C4F7Y7|A0A0C4F7Y7_PUCT1 Uncharacterized protein OS=Puccinia triticina (isolate 1-1 / race 1 (BBBD)) GN=PTTG_09273 PE=4 SV=1
	24.5277		2	2	2	37	37	37	8.5913	0	15.538	28907000	2	tr|A0A0C4EIJ7|A0A0C4EIJ7_PUCT1	tr|A0A0C4EIJ7|A0A0C4EIJ7_PUCT1	tr|A0A0C4EIJ7|A0A0C4EIJ7_PUCT1 Uncharacterized protein OS=Puccinia triticina (isolate 1-1 / race 1 (BBBD)) GN=PTTG_25230 PE=4 SV=1
